# Supplementary material for: Molecular evolution of the reactive oxygen-generating NADPH oxidase (Nox/Duox) family of enzymes
Source: Springer Nature journal article supplement (doi:10.1186/1471-2148-7-109), 2007-07-06

A

| species                |               | Nox1 | Nox2 | Nox3 | Nox4         | Nox5         | Duox | NOXA | NOXB | NOXC | NOXD | At-rboh |
|------------------------|---------------|------|------|------|--------------|--------------|------|------|------|------|------|---------|
| <i>H. sapiens</i>      | tetrapod      | 1    | 1    | 1    | 1            | 1            | 2    |      |      |      |      |         |
| <i>C. familiaris</i>   | tetrapod      | 1    | 1    | 1    | 1            | 1            | 2    |      |      |      |      |         |
| <i>R. norvegicus</i>   | tetrapod      | 1    | 1    | 1    | 1            |              | 2    |      |      |      |      |         |
| <i>M. musculus</i>     | tetrapod      | 1    | 1    | 1    | 1            |              | 2    |      |      |      |      |         |
| <i>G. gallus</i>       | tetrapod      | 1    | 1    | 1    | 1            | 1            | 1    |      |      |      |      |         |
| <i>X. tropicalis</i>   | tetrapod      | 1    | 1    |      | 1            | 1            | 2    |      |      |      |      |         |
| <i>T. nigroviridis</i> | teleost fish  | 1    | 1    |      | <sup>a</sup> | <sup>c</sup> | 1    |      |      |      |      |         |
| <i>T. rubripes</i>     | teleost fish  | 1    | 1    |      |              | <sup>d</sup> | 1    |      |      |      |      |         |
| <i>D. rerio</i>        | teleost fish  | 1    | 1    |      | <sup>b</sup> | <sup>d</sup> | 1    |      |      |      |      |         |
| <i>O. latipes</i>      | teleost fish  | 1    | 1    |      | 1            | 1            | 1    |      |      |      |      |         |
| <i>C. intestinalis</i> | urochordate   |      | 1    |      | 1            |              | 4    |      |      |      |      |         |
| <i>S. purpuratus</i>   | echinodermata |      | 2    |      |              |              | 1    |      |      |      |      |         |
| <i>D. melanogaster</i> | insect        |      |      |      |              | 1            | 1    |      |      |      |      |         |
| <i>A. gambiae</i>      | insect        |      |      |      |              | 1            | 1    |      |      |      |      |         |
| <i>A. mellifera</i>    | insect        |      |      |      |              | 1            | 1    |      |      |      |      |         |
| <i>C. elegans</i>      | nematode      |      |      |      |              |              | 2    |      |      |      |      |         |
| <i>P. anserine</i>     | fungus        |      |      |      |              |              |      | 1    | 1    |      |      |         |
| <i>A. nidulans</i>     | fungus        |      |      |      |              |              |      | 1    |      |      |      |         |
| <i>M. grisea</i>       | fungus        |      |      |      |              |              |      | 1    | 1    |      | 1    |         |
| <i>F. graminearum</i>  | fungus        |      |      |      |              |              |      | 1    | 1    |      | 1    |         |
| <i>D. discoideum</i>   | amoeba        |      |      |      |              |              |      | 1    | 1    |      | 1    |         |
| <i>A. thaliana</i>     | green plant   |      |      |      |              |              |      |      |      |      |      |         |
| <i>C. crispus</i>      | red alga      |      |      |      |              |              |      |      |      |      |      | 1       |
| <i>P. yezeensis</i>    | red alga      |      |      |      |              |              |      |      |      |      |      | 1       |

10

B

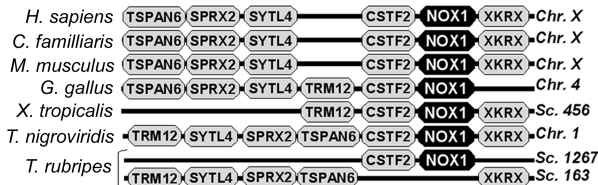

C

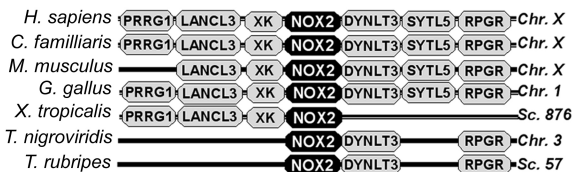

D

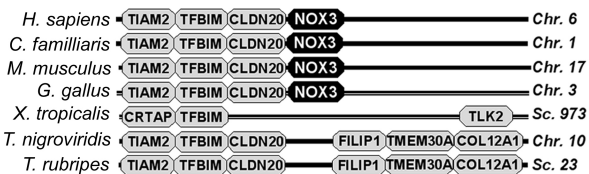

E

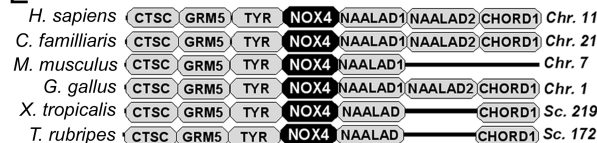

F

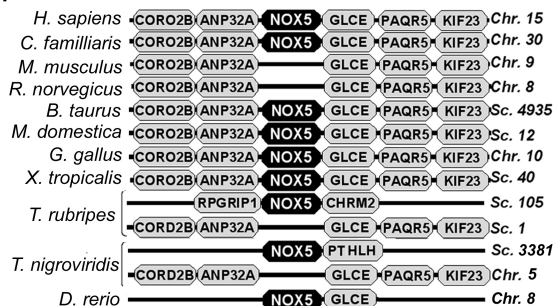

G

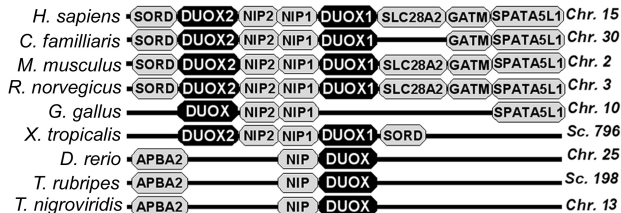

Supplement: 12862_2007_403_MOESM15_ESM.pdf [file 12862_2007_403_MOESM15_ESM.pdf]
