# Supplementary material for: Molecular evolution of the reactive oxygen-generating NADPH oxidase (Nox/Duox) family of enzymes
Source: Springer Nature journal article supplement (doi:10.1186/1471-2148-7-109), 2007-07-06
Supplement: 12862_2007_403_MOESM2_ESM.pdf [file 12862_2007_403_MOESM2_ESM.pdf]

## Additional file 2

### Supplemental Figure S2. Sequences of EF-hand motifs in Nox5, Duox, plant Nox, and NoxC

The original alignment data are shown in Additional file 8. EF (I) to EF (IV) represent four EF-hands of Nox5. Each EF-hand domain contains a twelve residue loop that is involved in calcium-binding. The letters X, Y, Z, -Y, -X, and -Z indicate the six residues that directly participate in calcium-binding, and these six residues correspond to positions 1, 3, 5, 7, 9 and 12. The consensus sequences of these six positions are: D at position 1, D/N/S at position 3, D/E/N/S/T/G at position 5, G/P at position 7, D/E/N/Q/S/T/A/G/C at position 9, and D/E at position 12 (PROSITE documentation number PDOC00018), and the most conserved positions are 1, 3, and 12. *Asterisks* indicate atypical EF-hand motif that is not consistent with the consensus sequences at positions 1, 3, or 12. Predicted *T. rubripes* (Tr)-Nox5 sequence was not a complete sequence; therefore the 1<sup>st</sup> EF-hand motif sequence was not shown. The *arrows* indicate motifs that have 17 to 23 additional amino acids inserted in the indicated position. Abbreviations of species are as in Figure 2.

|                        | <u>EF-I</u>   | <u>EF-II</u>  | <u>EF-III</u> | <u>EF-IV</u>   |
|------------------------|---------------|---------------|---------------|----------------|
|                        | X Y Z-Y-X-Z   | X Y Z-Y-X -Z  | X Y Z-Y-X -Z  | X Y Z-Y-X -Z   |
| human-Hs-Nox5 $\alpha$ | AG-EDGEISLQE* | DSDRSGTITLQE  | DIDGSGSIDPDE  | DADNGAITFEE    |
| dog-Cf-Nox5            | AE-KDREINLQQ* | DSDGSGTITLQE  | DVDGSGSIDADE  | DKDCNGAITFDE   |
| cow-Bt-Nox5            | AG-EDGEINLQD* | DSDGSGTITLQE  | DVDGSGSIDADE  | DKDCSGTITFEE   |
| chicken-Gg-Nox5        | AG-HDEEIGLEE* | DVDGSGTISLAE  | DVDGSGSIDAAE  | DQDNGSITFQE    |
| frog-Xt-Nox5           | AG-DDKEIDLEE* | DSDGSGSISLDE  | DVDGSGSIDPSE  | DKDHSGSITFQE   |
| opossum-Md-Nox5        | AG-EDREIDLQE* | DSDGSGTITLQE  | DVDGNGSIDPDE  | DKDHSGSITFEE   |
| fugu-Tr-Nox5           | -----         | DSDGSSSISLDE  | DVDGSGSIDPDE  | DKDHSGSITFEE   |
| medaka-OI-Nox5         | AG-DDKEINLCE* | DSDGSGSISLDE  | DVDGSGSIDPDE* | DTDNSGSITFEE   |
| sea urchin-Sp-Nox5A    | AG-EDRQIDEDE* | DQDGSYISLDE   | DVDGNGAIDHEE  | DTDGSGAIFSEE   |
| sea urchin-Sp-Nox5B    | AG-DDNLIDLDE* | DTDGSGSISLKE  | DVDGSGFIDFDE  | DVDGDGEVSFEE   |
| fruit fly-Dm-Nox5      | VG-NEQEIRREE* | DKDNSGSISLQE  | DIDGDGLIQHKE  | DPHNSGEITYEA*  |
| mosquito-Ag-Nox5       | VG-NEKEIRREE* | DKDNSGSISLQE  | DLDDGLIQHRE   | DKYNRGAITYEA*  |
| honeybee-Am-Nox5       | VG-NEKEIRREE* | DKDNSGTISLQE  | DIDGDGLIQLRE  | DQSNRGAITFEE*  |
| fungus-Mg-NoxC         | -----         | -----         | DHDGDCIDYSE   | -----          |
| fungus-Fg-NoxC         | -----         | -----         | DHDNDGHINYEE  | -----          |
| At-rbohF               | -----         | -----         | DKNEDGRITEEE  | DPERLGYIELWQ*  |
| At-rbohI               | -----         | -----         | CYQLSSNLVKHI* | APDGLYYIELKD*  |
| At-rbohC               | -----         | -----         | DKDADGRLTEDE  | DPDNIGYIMLES*  |
| At-rbohG               | -----         | -----         | DKDSDGRLTEDE  | DPDHMGYIMMES*  |
| At-rbohA               | -----         | -----         | DKDSDGRLNEAE  | DPYHYGYIMIEN*  |
| At-rbohD               | -----         | -----         | DKDEDGRVTEEE  | DPDNAGFIEMIEN* |
| At-rbohB               | -----         | -----         | DKNLDGRITGDE  | DRDNLGYIELHN*  |
| At-rbohE               | -----         | -----         | DSNEDGKITREE  | DPENFGYIELWQ*  |
| At-rbohH               | -----         | -----         | DKNGDGKLTTEE  | DPDHKGYIEMWQ*  |
| At-rbohJ               | -----         | -----         | DKDGDGKLTTEE  | DPNEQGYIEMWQ*  |
| amoeba-Dd-NoxC         | -----         | -----         | DIYDKGFSRDD*  | DKNMDGYIDFEE   |
| mouse-Mm-Duox1         | -----         | DKDGNGLSFRE   | DFDGNGLISKDE  | -----          |
| mouse-Mm-Duox2         | -----         | DKDGNGYISFRE  | DLDGNGLFSKDE  | -----          |
| dog-Cf-Duox1           | -----         | DKDGNGLSFRE   | DFDGNGLISKDE  | -----          |
| dog-Cf-Duox1           | -----         | DKDGNGLSFRE   | DLDANGFLSKDE  | -----          |
| human-Hs-Duox1         | -----         | DKDGNGLSFRE   | DFDGNGLISKDE  | -----          |
| human-Hs-Duox2         | -----         | DKDGNGLSFRE   | DLDENGFLSKDE  | -----          |
| rat-Rn-Duox1           | -----         | DKDGNGLSFRE   | DFDGNGLISKDE  | -----          |
| rat-Rn-Duox2           | -----         | DKDGNGYISFRE  | DLDGNGLFSKDE  | -----          |
| chicken-Gg-Duox        | -----         | DKDGNGYISFRE  | DIDENGFLSKDE  | -----          |
| frog-Xt-Duox1          | -----         | DKDHNGYLSFEE  | DVNGNGLPKEE   | -----          |
| frog-Xt-Duox2          | -----         | DEDNGYLSFRE   | DVDGNGLFSKDE  | -----          |
| fugu-Tr-Duox           | -----         | DKDGNGLSFQE   | DIGGTGSLSKGE* | -----          |
| tetraodon-Tn-Duox      | -----         | DKDGNGLSFQE   | -----         | -----          |
| zebrafish-Dr-Duox      | -----         | DKDGNGLSFQE   | DIKGDGFLSKEE* | -----          |
| medaka-OI-Duox         | -----         | DTDHSGYLSFQE  | DVCGNGYLSKEE  | -----          |
| ascidian-Ci-Duox-B     | -----         | DTDHSGYLSFRE  | DVDHSGEINREE  | -----          |
| ascidian-Ci-Duox-A     | -----         | DSDGSGAISFRE  | DLDKSGELSKKE  | -----          |
| ascidian-Ci-Duox-C     | -----         | DSEDEGTISFRE  | DLDKSGELSKKE  | -----          |
| ascidian-Ci-Duox-D     | -----         | DEDQDGFISFHD  | DLNQNGSLTKQQ* | -----          |
| sea urchin-Sp-Duox     | -----         | DQDNSGSISFRE  | DIDRSGHLSREE  | -----          |
| fruit fly-Dm-Duox      | -----         | DKDQDGRISFQE  | DNDNRNGVIDKGE | -----          |
| mosquito-Ag-Duox       | -----         | DKDKDGRISFQE  | DNDNRNGVIDKGE | -----          |
| honeybee-Am-Duox       | -----         | DKDRDGRISFQE  | DKDCNGVIDKEE  | -----          |
| nematode-Ce-Duox1      | -----         | AKHNEDSLSFNE* | DLEGGKVKLRKD* | -----          |
| nematode-Ce-Duox2      | -----         | AKHNEDSLSFNE* | DLEGGKVKLRKD* | -----          |
