# Supplementary material for: Molecular evolution of the reactive oxygen-generating NADPH oxidase (Nox/Duox) family of enzymes
Source: Springer Nature journal article supplement (doi:10.1186/1471-2148-7-109), 2007-07-06
Supplement: 12862_2007_403_MOESM3_ESM.pdf [file 12862_2007_403_MOESM3_ESM.pdf]

### **Additional file 3**

#### **Supplemental Figure S3. Substitution rates of vertebrate Nox/Duox and Nox regulatory proteins**

The amino acid substitution rates per site of vertebrate Noxes (*A*) and of their regulatory proteins (*B*) are shown. Rate 1 (R1) indicates substitution rate per site between species A and B. Rate 2 (R2) indicates substitution rate per site, per  $10^9$  years. Myr means  $10^6$  years.

A

| species A                          | species B                   | Nox1 |                             | Nox2 |                             | Nox3 |                             | Nox4 |                             | Nox5 |                             | Duox |                             |      |
|------------------------------------|-----------------------------|------|-----------------------------|------|-----------------------------|------|-----------------------------|------|-----------------------------|------|-----------------------------|------|-----------------------------|------|
|                                    |                             | Myr  | substitutions per site (R1) | R2   | substitutions per site (R1) | R2   | substitutions per site (R1) | R2   | substitutions per site (R1) | R2   | substitutions per site (R1) | R2   | substitutions per site (R1) | R2   |
| <i>C. famiariis</i> (dog)          | <i>H. sapiens</i> (human)   | 83   | 0.065                       | 0.78 | 0.040                       | 0.48 | 0.065                       | 0.78 | 0.070                       | 0.84 | 0.065                       | 0.78 | 0.030                       | 0.36 |
| <i>M. musculus</i> (mouse)         | <i>H. sapiens</i> (human)   | 91   | 0.080                       | 0.88 | 0.035                       | 0.38 | 0.100                       | 1.10 | 0.050                       | 0.55 |                             |      | 0.020                       | 0.22 |
| <i>R. norvegicus</i> (rat)         | <i>H. sapiens</i> (human)   | 91   | 0.090                       | 0.99 | 0.035                       | 0.38 | 0.095                       | 1.04 | 0.055                       | 0.60 |                             |      | 0.025                       | 0.27 |
| <i>G. gallus</i> (chicken)         | <i>H. sapiens</i> (human)   | 310  | 0.165                       | 0.53 | 0.080                       | 0.26 | 0.135                       | 0.44 | 0.115                       | 0.37 | 0.195                       | 0.63 | 0.105                       | 0.34 |
| <i>G. gallus</i> (chicken)         | <i>M. musculus</i> (mouse)  | 310  | 0.175                       | 0.56 | 0.085                       | 0.27 | 0.160                       | 0.52 | 0.130                       | 0.42 |                             |      | 0.105                       | 0.34 |
| <i>G. gallus</i> (chicken)         | <i>R. norvegicus</i> (rat)  | 310  | 0.170                       | 0.55 | 0.085                       | 0.27 | 0.160                       | 0.52 | 0.130                       | 0.42 |                             |      | 0.110                       | 0.35 |
| <i>X. tropicalis</i> (frog)        | <i>H. sapiens</i> (human)   | 360  | 0.180                       | 0.50 | 0.100                       | 0.28 |                             |      | 0.175                       | 0.49 | 0.170                       | 0.47 | 0.130                       | 0.36 |
| <i>X. tropicalis</i> (frog)        | <i>M. musculus</i> (mouse)  | 360  | 0.195                       | 0.54 | 0.100                       | 0.28 |                             |      | 0.175                       | 0.49 |                             |      |                             |      |
| <i>X. tropicalis</i> (frog)        | <i>R. norvegicus</i> (rat)  | 360  | 0.190                       | 0.53 | 0.100                       | 0.28 |                             |      | 0.175                       | 0.49 |                             |      |                             |      |
| <i>D. rerio</i> (zebrafish)        | <i>H. sapiens</i> (human)   | 450  | 0.205                       | 0.46 | 0.160                       | 0.36 |                             |      |                             |      |                             |      | 0.140                       | 0.31 |
| <i>T. rubripes</i> (fugu)          | <i>H. sapiens</i> (human)   | 450  | 0.210                       | 0.47 | 0.160                       | 0.36 |                             |      | 0.205                       | 0.46 | 0.170                       | 0.38 | 0.145                       | 0.32 |
| <i>T. nigroviridis</i> (tetraodon) | <i>H. sapiens</i> (human)   | 450  | 0.215                       | 0.48 | 0.160                       | 0.36 |                             |      |                             |      |                             |      |                             |      |
| <i>D. rerio</i> (zebrafish)        | <i>X. tropicalis</i> (frog) | 450  | 0.210                       | 0.47 | 0.170                       | 0.38 |                             |      |                             |      |                             |      | 0.150                       | 0.33 |
| <i>T. rubripes</i> (fugu)          | <i>X. tropicalis</i> (frog) | 450  | 0.205                       | 0.46 | 0.170                       | 0.38 |                             |      | 0.205                       | 0.46 |                             |      | 0.150                       | 0.33 |
| <i>T. nigroviridis</i> (tetraodon) | <i>X. tropicalis</i> (frog) | 450  | 0.205                       | 0.46 | 0.170                       | 0.38 |                             |      |                             |      |                             |      |                             |      |
| <i>D. rerio</i> (zebrafish)        | <i>G. gallus</i> (chicken)  | 450  | 0.210                       | 0.47 | 0.160                       | 0.36 |                             |      |                             |      |                             |      | 0.150                       | 0.33 |
| <i>T. rubripes</i> (fugu)          | <i>G. gallus</i> (chicken)  | 450  | 0.210                       | 0.47 | 0.150                       | 0.33 |                             |      | 0.220                       | 0.49 |                             |      |                             |      |
| <i>T. nigroviridis</i> (tetraodon) | <i>G. gallus</i> (chicken)  | 450  | 0.210                       | 0.47 | 0.155                       | 0.34 |                             |      |                             |      |                             |      |                             |      |
| <i>B. taurus</i> (cow)*            | <i>H. sapiens</i> (human)   | 92   |                             |      |                             |      |                             |      |                             |      | 0.065                       | 0.71 |                             |      |
| <i>B. taurus</i> (cow)*            | <i>C. famiariis</i> (dog)   | 83   |                             |      |                             |      |                             |      |                             |      | 0.050                       | 0.60 |                             |      |

B

| species A                          | species B                   | p47phox |                             | NOXO1 |                             | p67phox |                             | NOXA1 |                             | p22phox |                             |      |
|------------------------------------|-----------------------------|---------|-----------------------------|-------|-----------------------------|---------|-----------------------------|-------|-----------------------------|---------|-----------------------------|------|
|                                    |                             | Myr     | substitutions per site (R1) | R2    | substitutions per site (R1) | R2      | substitutions per site (R1) | R2    | substitutions per site (R1) | R2      | substitutions per site (R1) | R2   |
| <i>C. famiariis</i> (dog)          | <i>H. sapiens</i> (human)   | 83      | 0.070                       | 0.84  | 0.125                       | 1.51    | 0.070                       | 0.84  | 0.165                       | 1.99    | 0.075                       | 0.90 |
| <i>M. musculus</i> (mouse)         | <i>H. sapiens</i> (human)   | 91      | 0.080                       | 0.88  | 0.135                       | 1.48    | 0.080                       | 0.88  | 0.190                       | 2.09    | 0.060                       | 0.66 |
| <i>R. norvegicus</i> (rat)         | <i>H. sapiens</i> (human)   | 91      | 0.085                       | 0.93  | 0.135                       | 1.48    | 0.135                       | 1.48  | 0.185                       | 2.03    | 0.050                       | 0.55 |
| <i>G. gallus</i> (chicken)         | <i>H. sapiens</i> (human)   | 310     | 0.140                       | 0.45  | 0.320                       | 1.03    | 0.185                       | 0.60  | 0.360                       | 1.16    |                             |      |
| <i>G. gallus</i> (chicken)         | <i>M. musculus</i> (mouse)  | 310     | 0.135                       | 0.44  | 0.330                       | 1.06    | 0.200                       | 0.65  | 0.375                       | 1.21    |                             |      |
| <i>G. gallus</i> (chicken)         | <i>R. norvegicus</i> (rat)  | 310     | 0.145                       | 0.47  | 0.325                       | 1.05    | 0.240                       | 0.77  | 0.365                       | 1.18    |                             |      |
| <i>X. tropicalis</i> (frog)        | <i>H. sapiens</i> (human)   | 360     | 0.170                       | 0.47  | 0.315                       | 0.88    | 0.230                       | 0.64  | 0.330                       | 0.92    | 0.145                       | 0.40 |
| <i>X. tropicalis</i> (frog)        | <i>M. musculus</i> (mouse)  | 360     | 0.165                       | 0.46  | 0.310                       | 0.86    | 0.235                       | 0.65  | 0.340                       | 0.94    | 0.130                       | 0.36 |
| <i>X. tropicalis</i> (frog)        | <i>R. norvegicus</i> (rat)  | 360     | 0.160                       | 0.44  | 0.310                       | 0.86    | 0.270                       | 0.75  | 0.340                       | 0.94    | 0.130                       | 0.36 |
| <i>D. rerio</i> (zebrafish)        | <i>H. sapiens</i> (human)   | 450     | 0.205                       | 0.46  | 0.340                       | 0.76    | 0.270                       | 0.60  | 0.340                       | 0.76    | 0.215                       | 0.48 |
| <i>T. rubripes</i> (fugu)          | <i>H. sapiens</i> (human)   | 450     | 0.205                       | 0.46  |                             |         | 0.290                       | 0.64  |                             |         | 0.205                       | 0.46 |
| <i>T. nigroviridis</i> (tetraodon) | <i>H. sapiens</i> (human)   | 450     | 0.210                       | 0.47  | 0.345                       | 0.77    | 0.290                       | 0.64  |                             |         | 0.190                       | 0.42 |
| <i>D. rerio</i> (zebrafish)        | <i>X. tropicalis</i> (frog) | 450     | 0.210                       | 0.47  | 0.275                       | 0.61    | 0.280                       | 0.62  | 0.315                       | 0.70    | 0.185                       | 0.41 |
| <i>T. rubripes</i> (fugu)          | <i>X. tropicalis</i> (frog) | 450     | 0.185                       | 0.41  |                             |         | 0.295                       | 0.66  |                             |         | 0.195                       | 0.43 |
| <i>T. nigroviridis</i> (tetraodon) | <i>X. tropicalis</i> (frog) | 450     | 0.185                       | 0.41  | 0.300                       | 0.67    | 0.295                       | 0.66  |                             |         | 0.175                       | 0.39 |
| <i>D. rerio</i> (zebrafish)        | <i>G. gallus</i> (chicken)  | 450     | 0.195                       | 0.43  | 0.290                       | 0.64    | 0.255                       | 0.57  | 0.345                       | 0.77    |                             |      |
| <i>T. rubripes</i> (fugu)          | <i>G. gallus</i> (chicken)  | 450     | 0.195                       | 0.43  |                             |         | 0.280                       | 0.62  |                             |         |                             |      |
| <i>T. nigroviridis</i> (tetraodon) | <i>G. gallus</i> (chicken)  | 450     | 0.200                       | 0.44  | 0.300                       | 0.67    | 0.280                       | 0.62  |                             |         |                             |      |
