# Supplementary material for: Molecular evolution of the reactive oxygen-generating NADPH oxidase (Nox/Duox) family of enzymes
Source: Springer Nature journal article supplement (doi:10.1186/1471-2148-7-109), 2007-07-06
Supplement: 12862_2007_403_MOESM4_ESM.pdf [file 12862_2007_403_MOESM4_ESM.pdf]

Additional file 4

### **Amino acid sequences of Nox and Duox proteins**

To describe sequences from different species, we used the following naming: human-Hs (as *H. sapiens*), cow-Bt (*B. taurus*), dog-Cf (*C. familiaris*), rat-Rn (*R. norvegicus*), mouse-Mm (*M. musculus*), chicken-Gg (*G. gallus*), opossum-Md (*M. domestica*), armadillo-Dn (*D. novemcinctus*), rabbit-Oc (*O. cuniculus*), frog-Xt (*X. tropicalis*), zebrafish-Dr (*D. rerio*), fugu-Tr (*T. rubripes*), tetraodon-Tn (*T. nigroviridis*), medaka-Ol (*O. latipes*), ascidian-Ci (*C. intestinalis*), sea urchin-Sp (*S. purpuratus*), fruit fly-Dm (*D. melanogaster*), mosquito-Ag (*A. gambiae*), mosquito-Ae (*A. aegypti*), honeybee-Am (*A. mellifera*), nematode-Ce (*C. elegans*), At (*A. thaliana*), amoeba-Dd (*D. discoideum*), fungus-Pa (*P. anserina*), fungus-An (*A. nidulans*), fungus-Mg (*M. grisea*), fungus-Fg (*F. graminearum*), alga-Cc (*C. crispus*) and alga-Py (*P. yezoensis*). Sequences are available from the indicated servers: <http://www.ncbi.nlm.nih.gov/> (GenBank™ numbering genes), <http://www.ddbj.nig.ac.jp/searches-e.html>. (DDBJ number gene) or <http://www.ensembl.org>. (ensembl numbering genes), and <http://flybase.net/> (FlyBase accession number sequences). Genome locations of vertebrate Nox genes are shown in Figure 3, and those of *C. intestinalis* genes are described herein, following accession numbers. The insertion containing 4 additional predicted transmembrane regions

(TM7-TM10) of the algal Nox orthologs that were trimmed prior to phylogenetic analyses is underlined.

> human-Hs-Nox1: GenBank™ accession No. NM\_007052

MGNWVVNHWFVSVLFLVWVWGLNVFLFVDAFLKYEKADKYYYTRKILGSTLACARASALCLNFNST  
LILLPVCRNLLSFLRGTCFSCSRTRLRKQLDHNLTFFHKLVAYMICLHTAIHIIAHLNFDCYSRSRQAT  
DGSLASILSSLSHDEKKGGSWLNPIQSRNTTVEYVTFSTIAGLTGVIMTIALILMVTSATEFIRRSYFE  
VFWYTHHLFIFYILGLGIHGIGGIVRGQTEESMNESHPRKCAESFEMWDDRDSDHCRRPKFEHPP  
ESWKWILAPVILYICERILRFYRSQQKVVITKVVMMHPSKVLELQMNKRGFSMEVGQYIFVNCPSISL  
LEWHPFTLTSAPEEDFFSIHRAAGDWTENLIRAFEQQYSPIPIEVDGPFGTASEDFVQYEVAVLVG  
AGIGVTPFASILKSIWYKFQCADHNLKTKKIYFYWICRETGAFSWFNNLLTSLEQEMEELGKVGFL  
NYRFLFTGWDSNIVGHAALNFDKATDIVTGLKQKTSFGRPMWDNEFSTIATSHPKSVVGVFLCGPR  
TLAKSLRKCCCHRYSSLDPRKVQFYFNKENF

> mouse-Mm-Nox1: GenBank™ No. NM\_172203

MGNWLVNHWLSVLFVSWLGLNIFLVVYAFLNYEKSDKYYYTREILGTALALARASALCLNFNSM  
MILIPVCRNLLSFLRGTCFSCNRTLRLKPLDHNLTFFHKLVAYMICIFTVIHIIAHLNFERYRRSQAM  
DGSLASVLSLSHPEKEDSWLNPIQSPNMTVMYAAFTSIAGLTGVVATVALVLMVTSAMEFIRRNYP  
ELFWYTHHLFVYIICLGIHGLGGIVRGQTEESLGHESHPHNCSHSFHEWDDHKGSCRHPHFAGHPP  
ESWKWILAPIAFYIFERILRFYRSQQKVVITKVVMMHPSNVLELQMRKRGFSMEVGQYIFVNCPSISF  
LEWHPFTLTSAPEEEFFSVHRAAGDWTNRLRTFEQQHSPMPRIEVDGPFGTSEDVQYEVAVL  
VGAGIGVTPFASILKSIWYKFQRADNKLKTQKIYFYWICRETGAFAWFNNLLNSLEQEMEELGKMD  
FLNYRFLFTGWDSNIAGHAALNFDRTDILTGLKQKTSFGRPMWDNEFSRIATAHPSAVGVFLCG  
PRTLAKSLRKRCQRYSSLDPRKVQFYFNKETF

> rat-Rn-Nox1: GenBank™ No. NM\_053683

MGNWLVNHWLSVLFVSWLGLNIFLVVYVFLNYEKSDKYYYTREILGTALALARASALCLNFNSM  
VILIPVCRNLLSFLRGTCFSCNHTLRKPLDHNLTFFHKLVAYMICIFTAIHIIAHLNFERYRSRQAM  
DGSLASVLSLSLHPEKEDSWLNPIQSPNVTVMYAAFTSIAGLTGVVATVALVLMVTSAMEFIRRNYP  
ELFWYTHHLFIIYIICLGIHGLGGIVRGQTEESMSHPRNCSYSFHEWDKYERSCRSPHFVGGPPE  
SWKWILAPIAFYIFERILRFYRSRQKVVITKVVMMHPCKVLELQMRKRGFTMGIGQYIFVNCPSISFL  
EWHPFTLTSAPEEEFFSIHRAAGDWTENLRTFEQQHSPMPRIEVDGPFGTSEDVQYEVAVLVG  
AGIGVTPFASFLKSIWYKFQRAHNKLKTQKIYFYWICRETGAFAWFNNLLNSLEQEMDELGKPDFL  
NYRFLFTGWDSNIAGHAALNFDRTDVLTLGLKQKTSFGRPMWDNEFSRIATAHPSVGVFLCGP  
PTLAKSLRKCCRRYSSLDPRKVQFYFNKETF

> dog-Cf-Nox1: GenBank™ No. XM\_549136

MGNWVVNHWFVSVLFLATWLGLNVFLFVHAFLSYEKADKYYYYTREILGSTLAWARASARCLNFNS  
MLILLPVCRNLLSFLRGTCFRCRRTLRLKQLDHNLTFFHKLVAYMICLHTAIHIIAHLNFERYRSRQA  
TDGSLASILSTLSHQKEEDSWLNPMQSPNMTVEYVTFSTIAGLTGVIITIALVLMVTSAMEFIRRSY  
FEVFWYTHHIFIIYFIGLGIHGIGGIVRGQTEESLNESHPHRCAESFKQWDDHDSHCKHPRFEGPLA  
ESWKWILAPGVLYILERILRFYRSQQKVVTIKVVMHPSKVLELQMIKRGFSMEVGQYIFVNCPSVSY  
LEWHPFTLTSAPPEEDFFSVHIRAVGDWTENLIRAFEQQCSPIPRIEVDGPFGTVSEDVFQYEVVVLV  
GAGIGVTPFASILKSIWYKFRHEDHNLKTQTIYFYWICRETGAFAWFNDLLASLECEMEELGKVDF  
LNYRFLFTGWDSNIASHATLNFDKATDILTGLKQKTSFGRPMWDNEFSTIANAHPRSVVGVFLCGP  
QTLAKSLKCCCQYSSLDPRKVQFYFNKENF

> chicken-Gg-Nox1: DDBJ™ No. BR000265

MGNWLVNHWFSAAVLAAWLGINIFLFTYYFLFFDRDERYFYTRAILGSALAWARASAKCLNFNSML  
ILLPVCRNLLSFLRGSFSCCRRTLRLKQLDHNLTFFHKLVAALALLTAVHTIAHLNLERYNHSQQAN  
DGS LHAVLSKMHLQDSNKWLNPIHSNQTTVEYVAFTTIPGLTGVIITLALILMVTSSTEFIRRNIFEV  
FWYTHHLFIIYFIGLVIHGAVGLVRGQTEESMKEVHPQSCAEFLVNKSKECRHQCCKEPEFGSIPAE  
VGMGVGLQESRLLHTPGCCXSSHTGTLPASQVVMHPAKVLELQMCKKGRMEVGQYIFVNCPAV  
SLEWHPFTLTSAPPEEDFFSIHIRAAGDWTEHIIDTFQQQKLEMPRIKVDGPFGTASEDVFLYEAM  
LVGAGIGVTPFASILKSIWYRFQQNDQTLKTKKIYFYWLCRDTGAFTWFNDLLASLEQKMAESGKA  
DFTYRFLFTGWDTSIANNAALHFDTVTDVTGLRQKTIFGRPRWDTEFSAVATAHPRSVVGVFLC  
GPEALAKVLRRSCHQHSSLDPRKVQFYFNKENF

> frog-Xt-Nox1: Ensembl No. ENSXETP00000021243

MGNWIANNWFVSVVVLATWLGLNIFIFINFFMIFEKGDSSYSYTRELLGSALAWARGSAACLNFNCLL  
ILLPVCRNLLSFLRGTCCTCVQRSMRKQLDNLAFHKLVGTYIALMTAIIHTIAHLNVERYCDAAQK  
KTDTLPGELSSIGEDGTWLNVPVRSPTVTPPYFAFTTIAGLTGVVITLALILMITSSTEFIRRCYFEVFW  
YTHHLFVIFFIGLVFHGAGRIVRGQTSDSMETNNEYEKCHNSFTQWQNSKSSNRDDDDHHNDKCT  
VPAFQGNPEGVRYKLMYFETRQKRKTHAIKPNHTTMGHPSKVLEIQMQKRGFKMEVGQYIFINC  
PSVSALEWHPFTLTSAPPEEDCFVHIRSAGDWTDNLIKVFQEQAENPPRLEVDGPFGTASEDVVFQY  
EVSMLVGAGIGVTPFASILKSIWYKFQRDDQRLKTKKIYFYWICRETGSFAWFADLLRSLEQEMICS  
GKDGFLNYRFLFTSWDSKIAGHVVIDFDHATDVTGLRQKTSYGRPIWENEFKVAEWHPKSTVG  
VFLCGPQALGKTLKQCCHQYSSLDPRKVQFYFNKENF

> tetraodon-Tn-Nox1: DDBJ™ No. BR000267

MGNWIVNHGLTSFILVVMGINIFLVWFYLFYDLGDQFFYTRHLLGSALAWARAPAAVLNFNCM  
LILLPVCRNLLSLLRGSFVCCGRSMRKQLDKNLSFHKLVAYMIALMTAVHTVAHLLNVEWYNNRQ  
GVYDELSTALSKLDDANGTTYLNPIRITDLIPTYFAFTTIAGLTGVIITLSLILITSSMEVIRRSYFEV  
WYTHHLFIIFFAGLVFHGAGRIVRSQQTTNPPHNTSYCKDHPDDWGHIPCEPIPFAGGFPQWTM  
WVIAPMFLYVCERLIRFVRYMQTVRYRRIVMRPSKVLELQLVKSGFKMEVGQYVFLNCPAISQLEW  
HPFTMTSAPEEDFFSVHIRSAGDWTDKLIDIMQKLPEGAQGPCKMGVDGPFGTASEDVFDYEVSM

VGAGIGVTPFASILKSIWYKFKESNPCLRTRKIIFYWLCRETHAFEFWFADLLQVLEKEMDERGMG  
DFLTYKLYLTKWDQSHADHIMVHSDQDIDVVTGLRQKTYTGRPAWDKEFEQVRKENPTS SVVGTFL  
CGPEALAEVLEKKCVKYSDVDPRKTKFYFNKENF

> zebrafish-Dr-Nox1: DDBJ™ No. BR000266

MGNWIINHGLSAFIVVWMAINIALFVHFYLFYDQGERFEYTRELLGSALAWARAPAAVLNFCML  
ILLPVCRNLLSLRGSFVCCGRTVRKQLDKNLTFHKLVAIYALMTAVHTIAHLFNAERYNSLEGE  
DGDALAFELSLLDSSSELNTTYLNPFPNSSTTPMIFVFTSIAGLTGVVITLALILMITSSMEVIRRSYFE  
VFWYTHHLFIVFFAGLVFVHGAGRVRGQVTTDPPHNNSFCEDQPDNWGKIPECPIQFAGGSPQT  
WMYVIGPMIYICERLLRFIRYMQPVTYRKIVIRPSKVLELQLVKPGFSMDVGQYVFLNCPAISQLEW  
HPFTLTSAPPEEDFFSVHIRSVGDWTEKLLKVENLPEGGQGPKYVLLWIFTITSRMGVDGPFGTAS  
EDVFHYEVSMLVGAGIGVTPFASILKSIWYKFKSDPKLRTRKIIFYWLCRETHAFEFWFADLLQVL  
EREMEERGMRDFLTYKLYLTKWDQSHADHAMVHFDKDTDIITGLKQKTHYGRPNWDKEFEQVR  
QENPSSVVGTFCLCGPQALAKDLEKKCVKYSDVDPRRTKPHYFNKENF

> medaka-Ol-Nox1: Ensembl No. ENSORLP0000001741

MANWIINNGFPAVMVLVWMTINTFLVWYLYQYDRDDDFYYTRHLLGSALAWARAPAAVLNFCML  
LILLPVCRNLLSLRGSFVCCSRTMRKQLDKNLSFHKLVAIYALMTAVHTVAHLLNLEWLNNL  
GVYGLSTALSNEDEGNETFLNPLQHIEADPQQKPIKFAFTSIAGLTGVVITLALILITSSMEVIR  
SYFEVFWYIHLFIVFFVGLVFGHYGRIVRSQFNTDDHNATFCKDRPDDWGKIPECPIQFQGGEP  
MTWKWVIGPMIYVCERVLRFIRYMQAVQYRKIVIHPSKVLELQLRKKGFKMEVGQYVFLNCP  
QLEWHPFMTSAPEEDFFSVHIRSAGDWTDLIDTMQKLPEGAQGPKMVGDPFGTASEDVF  
EVSMLVGAGIGVTPFASIMKSIWYKFKECDPKLRTRKIIFYWLCRETNAFEWFADLLQVLEKEMEE  
RNLGDFLTYKLYLTKWDQGHDTQVIVHFDDEDTDVVTGLKQKTHYGRPNWDKEFDQVRKENPAS  
VGTFLCGPAALAKVLQKKCAKYSDVDPRKTKPHYFNKENF

> fugu-Tr-Nox1: DDBJ™ No. BR000268

MGNWIINHGLTAFILVWVWGINIFLVWFYLFYDLGERFFYTRHLLGSALAWARAPAAVLNFCML  
ILLPVCRNLLSLRGSFVCCGRSMRKQLDKNLSFHKLVAIYALMTAVHMAHLLNVEWYNNRSRQ  
GVYDKLSTALSNEDETKNTTYLNPISPTLSTYFVFTTIAGLTGVVITLALILITSSMEVIRRSYFEV  
WYTHHLFIFFAGLVFVHGAGRIVRSQNSEPAHDATFCKDRTEDWGKIPECPIQFSGGFPQTM  
GPMVLYLCERLIRFIRYMQTVRYRKIVMRPSKVLELQLMKRGFKMEVGQYVFLNCPAISQLEW  
HPFTLTSAPPEEDFFSVHIRSAGDWTDLKIEIMQQLPEGAQGPKMVGDPFGTASEDVF  
DYEVSMVVGAGIGVTPFASILKSIWYKFKESNPCLRTRKIIFYWLCRETHAFEFWFADLLQVLEKEM  
DERGMVDFLT YKLYLTKWDDGHVNHKIVYPTDMDVMTGLRQQNTNYGRPNWDKEFEQVRKENPTS  
SVVGTFLCGPEALAEVLEKKCVKYSDVDPRKTKPHYFNKENF

> human-Hs-Nox2: GenBank™ No. NM\_000397

MGNWAVNEGLSIFVILVWLGLNVFLVWYRVDIPPKFFYTRKLLGSALALARAPAAVLNFCML  
ILLPVCRNLLSLRGSFVCCSTRVRRQLDRNLTFFHKMVAIYALHSAIHTIAHLFNVEWCVNARVN

NSDPYSVALSELGDRQNESYLNFAKRIKNPEGGLYLAVTLLAGITGVVITLCLILIITSSTKTIRRSYF  
EVFWYTHHLFVIFFIGLAIHGAERIVRGQTAESLAVHNITVCEQKISEWKGKICEPIQFAGNPPMT  
WKWIVGPMFLYLCELRVRFWRSQQKVVITKVVTHPFTKIELQMKKKGFKMEVGQYIFVKCPKVS  
LEWHPFTLTSAPPEEDFFSIHIRIVGDWTEGLFNACGCDKQEFQDAWKLPKIAVDGPFGTASEDVFS  
YEVVMLVGAGIGVTPFASILKSVWYKYCNNATNLKLLKKIYFYWLCRDTHAFEFADLLQLLESQM  
QERNNAGFLSYNIYLTGWDESQANHFVHHDEEKDVITGLKQKTLYGRPNWDNEFKTIASQHPNT  
RIGVFLCGPEALAEATLSKQSSISNSESGPRGVHFIFNKENF

> mouse-Mm-Nox2: GenBank™ No. NM\_007807

MGNWAVNEGLSIFVILVWLGLNVFLFINYYKVYDDGPKYNYTRKLLGSALALARAPAAACLNFCM  
LILLPVCRNLLSFLRGSSACCSTRIRRLDRNLTFHKMVAWMIALHTAIHTIAHLFNVEWCVNARVG  
ISDRYSIALSDIGDNENEEYLNFAREKIKNPEGGLYVAVTRLAGITGIVITLCLILIITSSTKTIRRSYFE  
VFWYTHHLFVIFFIGLAIHGAERIVRGQTAESLEEHNLDICADKIEEWGKICEPVPKIFAGNPPMT  
WKWIVGPMFLYLCELRVRFWRSQQKVVITKVVTHPFTKIELQMKKKGFKMEVGQYIFVKCPKVS  
LEWHPFTLTSAPPEEDFFSIHIRIVGDWTEGLFNACGCDKQEFQDAWKLPKIAVDGPFGTASEDVFS  
YEVVMLVGAGIGVTPFASILKSVWYKYCDNATSLKLLKKIYFYWLCRDTHAFEFADLLQLLETQM  
QERNNANFLSYNIYLTGWDESQANHFVHHDEEKDVITGLKQKTLYGRPNWDNEFKTIASEHPNT  
TIGVFLCGPEALAEATLSKQSSISNSESGPRGVHFIFNKENF

> rat-Rn-Nox2: GenBank™ No. NM\_023965

MGNWAVNEGLSIFVILVWLGLNVFLFVKYYKVYDDEPKYNYTRKLLGSALALARAPAAACLNFCM  
LILLPVCRNLLSFLRGSSACCSTRIRRLDRNLTFHKMVAWMIALHTAIHTIAHLFNVEWCVNARVG  
TSDPYSVALSNIGDKENEEYLNFAREKIKNPEGGLYVAVTRLAGITGIVITLCLILIITSSTKTIRRSYF  
EVFWYTHHLFVIFFIGLAIHGAERIVRGQTSDSLKEHNLDVCADKIKEWGKICEPVPKIFAGNPPM  
TWKWIVGPMFLYLCELRVRFWRSQQKVVITKVVTHPFTKIELQMKKKGFKMEVGQYIFVKCPQVS  
KLEWHPFTLTSAPPEEDFFSIHIRIVGDWTEGLFNACGCDKQEFQDAWKLPKIAVDGPFGTASEDVFS  
SYEVVMLVGAGIGVTPFASILKSVWYKYCDNATSLRLKKIYFYWLCRDTHAFEFADLLQLLETQMQ  
ERNNANFLSYNIYLTGWDESQANHFVHHDEEKDVITGLKQKTLYGRPNWDNEFKTIASQHPNTR  
IGVFLCGPEALAKTLSKQSSISNSESGPRGVHFIFNKENF

> dog-Cf-Nox2: DDBJ™ No. BR000269

MGNWIENEGLSIFVILVWLGLNVFLFIWFYGVYNNGEFFYTRKLLGFALPLARAPAAACLNFCML  
ILLPVCRNLLSFLRGSSACCSTRIRRLDRNLTFHKLVAWMIALHTAIHTIAHLFNVEWCVNARVNN  
SDVYSIALSNLGDNPGESYLNFAARRIKNPEGGLYVAVTLLAGITGIVITLCLILIITSSTKTIRRSYFEV  
FWYTHHLFVIFFIGLAIHGAERIVRGQTAASRLEHNYKVCADNISQWGKIPDCPIQFSGNPPMTW  
KWIVGPMFLYLCELRVRFWRSQQKVVITKVVTHPFTKIELQMKKKGFKMEVGQYIFVKCPKVS  
EWHPFTLTSAPPEEDFFSIHIRIVGDWTEGLFNACGCDKQEFQDAWKLPKIAVDGPFGTASEDVFSY  
EVVMLVGAGIGVTPFASILKSVWYKYCNNATNLRLKKIYFYWLCRDTHAFEFADLLQLLETQMQ  
ERNNAGFLSYNIYLTGWDESQANHFVHHDEEKDVITGLKQKTLYGRPNWDNEFKTIASQHPNTR

IGVFLLCGPEALAETLSKQCISNSESGPRGVHFIFNKENF

> chicken-Gg-Nox2: DDBJ™ No. BR000270

MGNWVENEGLSIFVVLVWLGLNVFLFWWFYLAYDLPQNFYTRVLLGRALALARAPAAACLNFNCLL  
MLILLPVCRNLLSFLRGSSACCSTRVRRQLDRNLTFHKMVAWMIALHTAIHTIAHLFNVEWSVHAR  
VEEEGTAAVLSRLGDSFNESYINFYRQTIPNPVGGLYVAFTYLAGLTGVITLALILITSSSTKIIRRSY  
FEVFWYTHHLFVIFFIGLVIHGAGRIVRGQTAVSLAEHIPEVCSKNFTDWGKKGACVPPQFAGNPP  
MTWKWVVGPMFLYFCERLVRFRWSQQKVVITKVVVHPFKTIELQMMKKGFKMEVGQYIFVKCPAVS  
SKLEWHPFTLTSAPEDYFSIHVRIVGDWTEGLFNACGCDKQEFQEAWKLPKIAVDGPFGTASEDVF  
FSYETVMLVGAGIGVTPFASVLKSVWYKYCHDATNLKLLKIIYFYWLCRDTAFEFWFADLLQSLET  
QMQRNNAEFLSYNIYLTGWDETQATHFVMHHEEEKDVTGLKQKTLYGRPNWENEFKTIARQH  
PGSRIGVFLCGPEGLADTLNKQSSISNSEADPRGVHFIFNKENF

> frog-Xt-Nox2: GenBank™ No. NM\_001030518

MGNWIVNEGLSIAVHIVWLGLNGYLFWNFYLVYDEGEKYFYSRKLYGSALAWARAPAAACLNFNCLL  
ILLPVCRNLLSFLRGSSACCGRSLRRQLDRNLTFHKMVAWMIALHTAIHTGAHLFNVERLVDARVE  
ANGTIQAALTDLDREGESEYLNFRVSRVNPPIGGINVAFTFLAGLTGVVITLALILITSSSTKTIRRSYF  
EVFWYTHHLFVIFFIGLVIHGAGKIVRGQTDKSLEKHNSTECEDKFTWGNITSCPIPPQFAGNEPM  
TWKVVVAPMVLYVFERLVRFRWSQQKVVITKVVVTHPFKTIELQMKMKGFKMEVGQYIFVQCPAVS  
KLEWHPFTLTSAPEDFFSIHIRIVGDWTEGLFKACGCDKTEFQDAWKMPKIAVDGPFGTASEDVF  
SYEVAMLVGAGIGVTPFASVLKSVWYRYVNDASTLRLKIIYFYWLCRDTQAFEFWFADLLQSLETQM  
QERDNANFLVYNIYLTGWDESQATAFSLHHDQEKDVTGLKQKTLYGRPNWENEFKTIANAHNTSS  
RVGVFLCGPESLAETLNKQSIANSTVDPRGVHFIFNKENF

> tetraodon-Tn-Nox2: DDBJ™ No. BR000271

MGNFAANEGLSVFVILVWLGINAFLVHFYMAFLVERWFYTRVLLGHALSWARAPAAACLNFNCLL  
ILLPVCRNLLSFLRGSIQCCSRTAARQLDRNLTFHKLVAVMIAFHTAVHIVAHLNFEEFFMDAQLNR  
NSSYLPFILSEIGTGDNASFLNPIRTNETNPTIVMFTTIAGLTGVAITLALILITSSMEVIRRSYFEV  
WYTHHLFVIFFIGLVLHGFGRIVRGQTAASLTKNKEVCADRFEWGRNGSDCAVPEFAGNPPMT  
WKWVVGPMILYVCERIVRFYRSHQKVVITKVVVHPSKTLELRMKRKGFKHMEVGQYVFIQCPSVSR  
LEWHPFTLTSAPEDYFSAHIRIVGDWTQALYEACGGDRSEPPQEAWKLPKVAIDGPFGTASEDVF  
YEVVMLVGAGIGVTPFASILKSVWYKHIQKNQEVFTKKIYFYWLCPETEAFEFWFADLLQSLEGQMA  
DKGMTDFLSYNIYLTWKEKEAAHFRVHHEAENDPITGLKQKTLYGKPNWDHEFASIASQHPRSK  
VGVFLCGPPKLGQSLQKQCLSYSGADVFKIFNKENF

> fugu-Tr-Nox2: GenBank™ No. AB099894

MGNFAANEGLSTFVILVWLGINAFLVHFYMAFLVDRWFYTRVLLGHALSWARAPAAACLNFNCLL  
ILLPVCRNLLSFLRGSIQCCSRTAARQLDRNITFHKLVAYMIAFHTAVHIVAHLNFEEFFMDAQLNR  
NSSYLPFILSEIGTGDNASFLNPIRTNETNPTIVMFTTIAGLTGVAITLALILITSSMEVIRRSYFEV  
WYTHHLFIIFFIGLVLHGFGRIVRGQTPASLKSNDPTVCADQFEDWGRNGSNCAVPEFAGNPPMTW

KWVVGPMLYVLCERLVRFYRSHQKVVITKVVMMHPSKTLELQMKRKGFRMEVGQYVFIQCPSVSRL  
EWHPFTLTSAPPEEDYFSAHIRIVGDWTQALYEACGGDKSEPQEAWKLPKVAIDGPFGTASEDVFRY  
EVMMLVGAGIGVTPFASILKSVWYKHIQNNQEVFTKKIYFYWLCPETEAFEFWFADLLQSLEGQMTE  
KGMTDFLSYNIYLTRWKEKEAAHFRVHHEAENDPITGLKQKTLYGKPNWDNEFTNIASKHPGSKV  
GVFLCGPPQLGKSLQKQCLSHSEADV KFIFNKENF

>zebrafish-Dr-Nox2: GenBank™ No. NM\_200414.1

MGNFAANEGLSVFVILVWLGINVFLFVYFYLAFLIDKYYYTRVILGHALSWARAPAAACLNFCMLIL  
LPVCRNLLSFLRGSIQCCSRTAARQLDRNITFHKLVAYMIAFHTAVHIIAHLNFERFMDSQLMINSS  
HLPYVLSQIGNNDNRSYLNPIRSNDTNPTIVMFTTVAGLTGVVITLALILITSSMEVIRRSYFEVFWF  
THHLFIVFFIGLVLHGIGRIVRGQTDADLQVHDPTICHSKFEKWGNVTDCPVPIFAGNPPKTWKW  
VVGPMFLYVLCERLVRFYRSQQKVVITKVVTHPSKTLELQMKKKGFKMEVGQYIFMMCPSISQLEW  
HPFTLTSAPPEEDHFSVHIRIVGDWTQALYSACGGDKTAVLDAWTLPKMAVDGPFGTASEDVFRYEA  
VMLVGAGIGVTPFASVLKSVWYKHVQENQNVFTKKIYFYWLCPETQAFEFWFADLLQSLEKQMSDK  
NMSDFLSYNIYLTRWKDAEAAHLRVQYEAEDDPITGLKQKTRYGKPNWDNEFSLIASQHPGTKVG  
VFLCGPTALGKALSKQCLSHTEGGTEFIFNKENF

>medaka-Ol-Nox2: Ensembl No. ENSORLP00000002049

MGNFVANEGLSIFVILVWLGINAYLVQFYMNFLVERWFYTRVLLGHALSWARAPAAACLNFCMLI  
LLPVCRNLLSFLRGSIQCCSRTAARQLDRNLTFHKLVAYMIAFHTAVHIIAHLNFEYFMDAQLNRN  
HSHLPFILSEIGNDENVSFLNPIRSNETKSPTIVMFTTIAGLTGVVITLALILITSSMEVIRRSYFEV  
WYTHHLFVIFFIGLVFVHGFGRIVRGQTSRSLSDNDPDVCA DRFEDWGKNESGCAVPAFAGNPPMT  
WKWVVGPMLYVLCERLVRIRYRSHQKVVITKVVMMHPSKTLELQMKKKGFHMEVGQYVFIQCPSISR  
LEWHPFTLTSAPPEEDYFVSVHVRIVGDWTQALYEACGGNKSELQEAWKLPKVAIDGPFGTASEDVFR  
YEVVMLVGAGIGVTPFASILKSVWYKHIQNNQEVFTKKVRYIRLLRMSSSYLLFTLMVQKKIIRAWD  
RHRGNWLATPVARFGQLKNQAAHLRVHHEDENDPITGLKQKTLYGKPNWDNEFTNIASHPGSK  
VGVFLCGPPMLGKSLEKESISHTEAGVKFIFNKENF

>ascidian-Ci-Nox2: DDBJ™ No. BR000272 (Chromosome 6q: 1.91 M)

MNARLNGFLVNEFPKYIVFLLWLGFLNGFLFGYYNFFYNTKKTFFYTRVLLGPALALARAPAAACLN  
NCLLVLLPVCRNLLSLFRKACMCCPRRIRRVLDKNIKFHRMCAYMIVLMTLIHYFAHCFNVDFFTS  
AYQSKILATDTPAIQKQKLIKLIQIGNNGNETYLNPIRKS VFSVGAVFLTGGWTGVITLSLFFMV  
TSSLEFIRRSYFEVFWFTHHLFIVFYGFLVHGHISMQVRGQTPQSLTVHDPIRCSTIDPATWSQNNC  
PTPVFAGSPPM TWKVVIA PMVLYVIERIIRLVRFNQQVEVLKVIKHPSRVLEIQMRKNGFFAEVGGY  
VFIMCPQLSLEWHPFTLTSAPPEEDYFSIHVRIVGDWTTGLSKVLGADEAGNEVQPSWKMPRLAID  
GPFGTASEDVFNYPVAICVGSIGVTPFASLLKSVWYKNLNPEHEMVLKKVYFFWICPETHAFEFW  
GDLLKYLERQLTEIGRQDLIEYHIYLRGWDHKQAKAIYAHEEDTHDVITGLEQKTNYGRPNWDEI  
FSKTARDYPNTHIGVFFCGVAALS AKLHKMSNKHSGGGVYFHYNKENF

>sea urchin-Sp-Nox2A: GenBank™ No. AY704915 (initially termed Nox-U1)

MGDKFLNEGLKYFFLLWLAANVAYWVVTFLVYEQGPQYFYIRRITGVGLSIKAAGAALNLSMII  
LLPICRNLISFFRGSCATNTLCRRSVRRQLDKNLTFHKT VAYMIVVWTIVHVVAHAFNFRNLNHYR  
CVTTDNDELCEGISAIGRKFKA KPEDNWL NPIQGAKTLPAGLGLIEQALIPIAGW SGAVLTLALILM  
FSSATEFIRRSYFETFWITHHLFIVYFAMLLAHGVGGIIRSQTNLDRHDVVFCSENLDVWGPTSAQC  
EDPVFKDGSAAASYKWVSGPLFIYLLERTIRFWRSCQTVTLTKVVKHQSKVIELQMKKKGFKMEAG  
QYIFLKCP SISHVQWHPFTLTSAPEEDHFSVHIRVVDWTRDLFKAMGADKPEQQSQDELARVAVD  
GPFGTASIDIFKYQVAICVGAGIGVTPFASILKSIWLKSVNNSASLKLK VYFFWICPDTNAFEWFST  
LLDSIDTHFTEQKPDFLKYIYLSRGWNNTQAKNIYLQEEQEIDAITGLRQKTHYGRPKWDSNFK  
MIAEENPGRVSSVFFCGPKALSSVLHENANKFTSLTPDGAKFFYNKENF

>sea urchin-Sp-Nox2B: GenBank™ No. XM\_001180659

AAWAIVNLIHWLVTFKYM DNANYIYTKYLMKNGLPVARASAA CLNFNSMLILFPVCRNMISYLRGS  
CESTKFSRRNLRRQLDKNITFHKLIAAIGFFVILHVGAHCFNLQNL YNGRKATSEDDWLANRLSQ  
PSFDLNPFKTIRSSDVSGLVIGPGLSLLAGWTGAVLALTYILMFTSATEFIRYYFETFWLTHHLFVI  
YYAMLMTHGMGGVVKYQTNVDEHDPVECMVDEETF DQCVIDNPPLFAGTPGASWKWCVTPLCV  
YFLERILRMIRTWPDVTIVQVQH QSKVIELRMKKQGFKMLPGQYIFLKCSISKVQWHPFTLTSAP  
EEDYFSLHIRVGDWTEDELAVKMGADQAEPLSITQLPRVQVDGPFGT SCTDIFDYDVVMCVSAGIG  
VTPYASTLKSIWISSRQNFCTLHLKRMFYFYWICRDTHAFEFVVELLSLELILRQIDKEHLLSYSIYL  
TRGWDTYQAKNIFMQEDREIDAVTGLRQKTHYGRPKWDSNFSYIAEKNPRVSRIWNATIGVFFCGP  
KSLSTILHQSCNKHTSDESDGTRFVYYKENF

> human-Hs-Nox3: GenBank™ No. NM\_015718

MMGCWILNEGLSTILVLSWLGINFYLFIDTFYWYEEEE SFHYTRVILGSTLAWARASALCLNFNCM  
LILIPVSRNLISFIRGTSICCRGPWRRQLDKNLRFHKL VAYGIAVNATIHI VAHFFNLERYHWSQSEEA  
QGLLAALS KLGNTPNESYLN PVRTFPTNTTTELLRTIAGVTGLVISLALV LIMTSSTEFIRQASYELF  
WYTHHV FIVFFLSLAIHGTGRIVRGQTQDSL SLHNITFCRDRYA EWQTVAQCPVPQFSGKEPSAWK  
WILGPVVLYACERIIRFWRFQQEVVITKVVSHPSGVLELHMKKRGFKMAPGQYILVQCPAISSLEWH  
PFTLTSAPQEDFFSVHIRAAGDWTAALLEAFGAEGQALQEPW SLPRLAVDGPFGTALTDVFHY PVC  
VCVAAGIGVTPFAALLKSIWYKCSEAQTPLKLSKVYFYWICRDARAFEFWADLLLSLETRMSEQGK  
THFLSYHIFLTGW DENQALHIALHWDENTDVITGLKQKTFYGRPNWNNEFKQIAYNHPSSSIGVFF  
CGPKALSRTLQKMCHLYSSADPRGVHFYFNKESF

> mouse-Mm-Nox3: GenBank™ No. AY573240

MPVCWILNESGSFVALLWLA VNAYLFIDTFFWYTEEEAFFYTRVILGSALAWARASAVCLNFNCML  
ILLPVSRNFISLVRGTSVCCRGPWRRQLDKNLNFHKL VAYGIAVNSVIHIVAH LFNLERYHLGQAKD  
AEGLLAALS KLGDAPNESYLN PVRTFDMGTTTELLMTVSGITGLGISLALVFIMTSSTEFIRRSSYEL  
FWYTHHIFVFFFISLAIHGGGRIIRGQTPE SLRLHNVTYCRDHYA EWQAAALCPVPQFSGKEPSAW  
KWALGPVVLYACERIIRFWRSHQEVVITKVVSHPSAVLELHMKKRDFKMAPGQYIFIQCP SVSPLE  
WHPFTLTSAPQEDFFSVHIRASGDWTEALLKA FRVEGQAPSELCSMPRLAVDGPFGGSLADVFHY P



VSVCIATGIGVTPFASLLKSVWYKCCESQSLPELSKVYFYWICRDAGAFEFWADLLLSLETRMSEQG  
KAHLLSYHIYLTGW DENQAIHIALHWDES LDVITGLKQKAFYGRPNWNDEFKQIAYNHPSSSIGVF  
FCGSKAMSKTLQKMCRLYSSVDPRGVHFYFNKENF

>dog-Cf-Nox3: DDBJ™ No. BR000273

MMGCWILNESLSVILVLSWLGVNLYLFIDTFCWYEEEEESFLYTRVILGSTLAWARASAVCLNFCML  
ILLPISRNLISFMRGTSTCCRGLWRRQLDKNLKFHKLVAVGIAVNATIHIHAHLNLRQYHWSQSAE  
VQGLPATLSKLG NAPNESYLNPIRTFHTNTITELLTTIAGVTGLIISLALVIMTSSTESIRQVSYELF  
WYTHHVFIIFFIGLAIHGAGRIVRGQTPESQLLHNVTFCRDHHAQWQKMAQCPMPQFSGKEPSAW  
KWVLGPVVLYACERIIRFWRFQQEVVITKVVSHPSGVLELHMKKRNFKMAPGQYILVQCPSISWLE  
WHPFTLTSAPQEDFFSLHIRVAGDWTEALWKAFGAEGQALKEPWSLPR LAVDGPFGTTLTDVFHY  
PVSVCIAAGIGVTPFASLLKSIWYKCESQTLKLSKVYFYWICRDPKAFEFWADLLLSLETLM SERG  
KAHFLSYHIFLTSW DENQAVHIALHW DENTDVVTGLKQKTFYGRPNWSNEFRQLAYAH PSSSIGV  
FFCGPKALS KTLQRMCHLYSSADPRGVHFYFNKESF

>chicken-Gg-Nox3: GenBank™ No. XM\_426166.1

MACWILNEKLSVLLLLVWLG LNLYLFIDTFHWYED EDAYVYTRIMLGSTLAWARASATCLNFCML  
ILLPVSRNLISFLRGASACCGAPRRQLDKNIAFHKVVAYGIAVNATIHIHAHLINIERYHNSQSKEAG  
GLQNKLSGLGKRPNESYLNPIRTYETNTTGEVLTTIAGVTGVMITVAFVLIVTSSTELIRRSCYEVFW  
YTHHLFVVFVFIGLIHGTGQLVRGQTPHSLLLHNITYCKEHYLEWEKATQCPLPQFSGNKPVAVKW  
VVSPVVLYICERIVRFWRWFQQEVVITKVVTHSSGVLELHMKKHGFKMEAGQYIFLQCTSISPLEWH  
PFTLTSAP EEDFFSVHIRVAGDWTAALFKAFGAEEKTFKELWMLPRLVVDGPYGSATTDVFHYGVS  
VCIAAGIGVTPFASILKSIWYKSCNPNTVLVLQKVYFYWICRDPSTFEWFADLLFLETMVEKGKN  
DFLSYHIFLTGW DENQATHIALHYDEKMDVITGLRQKTFYGRPNWDSEFKQLAENHPSNSIGVFF  
CGPKNLSKILQKMCSSYSTVDPRGVQFHYNEESF

>rat-Rn-Nox3: GenBank™ No. NM\_001004216

MPTCWILNESVSFV VALLWLAINIYLFIDTFCWYAE EESFFYTRVILGSALAWARASAVCLNFCMLI  
LLPVSRNFVSLVRGTSVCCRGPWRRQLDKNLKFHKLVAVGIAVNSVIHIHAHLNLRERYHLGQAKD  
AEGLLAALS KLG NAPNESYLNPIVVRTLYTGTTTQLLMTVSGITGLVISLALILIMTSSTEFIRQSSYELF  
WYTHHIFIFL FISLAIHG GRIIRGQTPESLRLHNVTFCRDHFDEWQEAASCPVPQFSGKEPSAWK  
WTLGPVVLYACEIIRFWRSHQEVVITKVVSHPSAVLELHMKKRDFKMAPGQYIFIQCPSISPLEWH  
PFTLTSAPQEDFFSVHIRASGDWTEALLKAFGAEGQAPSELCSMPRLAVDGPFGGLADVFHYVPS  
VCIATGIGVTPFASLLKSVWYKCCESQSLPGLSKVYFYWICRDAAAF EFWADLLLSLETQMSEQGK  
AHL LSYHIYLTGWDEYQAIHIALHWDES LDVITGLKQKTFYGRPNWNEEFKQIAYNHPSSSIGVFF  
CGPKAMSKTLQKMCRLYSSSDPRGVHFYFNKENF

>human-Hs-Nox4: GenBank™ No. NM\_016931.2

MAVSWRSWLANEGVKHLCLFIWLSMNVLFWKTFLLYNQGPEYHYLHQMLGLGLCLSRASASVL  
NLNCSLILLPM CRTLLAYLRGSQKVPSRRTRRLLDKSRTFHITCGVTICIFSGVHVA AHLVNALNFSV

NYSEDFVELNAARYRDEDPRKLLFTTVPGLTGVCMVVVLFLMITASTYAIRVSNYDIFWYTHNLFFV  
FYMLLTLHVSGLLKYQTNLDTHPPGCISLNRRTSSQNISLPEYFSEHFHEPFPEGFSPAEFTQHKF  
VKICMEEPRFQANFPQTLWLWISGPLCLYCAERLYRYSNKPVTHISVMSHPSDVMEIRMVKENFKA  
RPGQYITLHCPSVSALENHPFTLTMCPPTETKATFGVHLKIVGDWTERFRDLLLPPSSQDSEILPFIQ  
SRNYPKLYIDGPFSGPFEEESLNYEVSLCVAGGIGVTPFASILNTLLDDWKPYKLRRLYFIWVCRDIQS  
FRWFADLLCMLHNKFWQENRPDYVNIQLYLSQTDGIQKIIGEKYHALNSRLFIGRPRWKLLFDEIA  
KYNRGKTVGVFCCGPNLSKTLHKLSNQNSYGRFEYNKESFS

>mouse-Mm-Nox4: GenBank™ No. NM\_015760

MAVSWRSWLANEGVKHLCLLIWLSLNVLLFWKTFLLYNQGPYYIYHQLMLGLGLCLSRASASVLN  
LNCSLILLPMCRTVLAYLRGSQKVPSRRTRRLDCKSKTLHITCGVTICIFSGVHVA AHLVNALNFSV  
NYSEDFLELNAARYQNEEDPRKLLFTTIPGLTGVCMVVVLFLMVTASTYAIRVSNYDIFWYTHNLFF  
VFYMLLLLHVSGLLKYQTNVDTHPPGCISLNRQTSSQNMSIPDYVSEHFHGLPRGFSKLEDYRQK  
TLVKICLEEPKFQAHFPQTIWISGPLCLYCAERLYRCIRSNKPVTHISVINHPSDVMELRMIKENFK  
ARPGQYIILHCPSVSALENHPFTLTMCPPTETKATFGVHFKVVDWTERFRDLLLPPSSQDSEILPFI  
HSRNYPKLYIDGPFSGPFEEESLNYEVSLCVAGGIGVTPFASILNTLLDDWKPYKLRRLYFIWVCRDIQ  
SFQWFADLLCVLHNKFWQENRPDFVNIQLYLSQTDGIQKIIGEKYHTLNSRLFIGRPRWKLLFDEIA  
KCNRGKTVGVFCCGPSSISKTLHSLSNRNNSYGTKEYNKESFS

>rat-Rn-Nox4: GenBank™ No. NM\_015760

MALSWRSWLANEGVKHLCLLVWLSLNVLLFWKTFLLYNQGPYYIYHQLMLGLGLCLSRASASVLN  
LNCSLILLPMCRTVLAYLRGSQKVPSRRTRRLDCKSKTLHITCGITICIFSGVHVA AHLVNALNFSVN  
YSEHFLALNAARYQNEEDPRKLLFTTVPGLTGVCMVVVLFLMVTASTYAIRVSNYDIFWYTHNLFFV  
FYMLLLLHVSGLLKYQTNLDTHPPGCISLNRTPSQNMSIADYVSEHFHGLPGGFSKLEDHYQK  
TLVKICLEEPKFQAHFPQTIWISGPLCLYCAERLYRCIRSNKPVTHISVINHPSDVMELRMIKENFK  
ARPGQYIILHCPSVSALENHPFTLTMCPPTETKATFGVHFKVVDWTERFRDLLLPPSSQDSEILPFI  
QSRNYPKLYIDGPFSGPFEEESLNYEVSLCVAGGIGVTPFASILNTLLDDWKPYKLRRLYFIWVCRDIQ  
SFQWFADLLYVLHNKFWQENRPDFVNIQLYLSQTDGIQKIIGEKYHTLNSRLFIGRPRWKLLFDEIA  
KCNRGKTVGVFCCGPSSISKTLHNLSNRNNSYGTKEYNKESFS

>dog-Cf-Nox4: GenBank™ No. XM\_542262.2

MENAVMILCTEYEHDEEYIDYRFIWLNSLNVLLFWKAFLLYNQGPYYHYLHQLMLGLGLCLSRASASVLN  
CSLILLPMCRTLLAYLRGSQKVPSRRTRRLDCKSRTFHITCGVTICIFSGVHVA AHLVNALNFSVNYNEDFTE  
LNAARYRDEDPRKLLFTTVPGLTGVMVLVFLMITASTYAIRVSNYDIFWYTHNLFFVFYMLLMLHVSGG  
LLKYQANLDTHPPGCININGTRYQNIHLPNYRSEHFHESFPGGLSKPDELQNRVNICMEEPRFQANFPQLP  
MWELTPCTLCLYCDTCFTSVKLNAPKVIVSNMINHPSDVMELRMIKENFKARPGQYIILHCPSVSALENHPFT  
LTMCPPTETKATFGVHLKIVGDWTERFRDLLLPPSNQDSEILPVIQSRKYPKLYIDGPFSGPFEEESLNYEVSLCV  
AGGIGVTPFASILNTLLDDWKPYKLRRLYFIWVCRDIQSFRWFADLLCVLHNKFWQENRPDYVNIQLYLSQT

DGIQKIIGEKYQALNSRFLIGRPRWKLLFDEIAKCNRGKTVGVFCCGPNISIKTLHKLSNRNNSYGTRFEYNK  
ESFS

>frog-Xt-Nox4: Ensembl No. ENSXETP00000025676

MALPCASWLSNEALKHLFLLSWLALNIGLFYKTFVYYSGPQYFYLHQMLGLGLCVSRASASVLN  
LNCSLVLLPMCRTVIGLLRGPKMVNIHWKTRRMLDKHKTFHAACGLAICLFSAHVLNAVNFVSNY  
NHEFPSINVARYKNEVVPVGTGVLMLVILFLMCTASTSSIRTANYGIFLHTHNLFFIFYLLLLLHACA  
GVLKYQSNLEEHPPGCLYLNRSAQGEVPGAAADGGEFPGRAARALMGSFFSHEDMSVHNNSEKIC  
TKGPTFRPHFPETWLWISGPLCLYCAERLYRIRSSKPVTVAVITHPCDVVEIRMVKEKFSARPGQY  
ITLLCPSVSALETHPFTLTMCPTESKATFAIHIKVVGDWTERFYELLESHTAGTEILPKCQQRKNP  
KIYVDGPFPGSPSEEVFNQISLSCIAGGIGVTPFASVLNRLLDSWDGYKLQRLYFVWVCRDIHSFLWF  
ADLLCLLHRKLWQENRPDYLNILYLSQTNGIQNIIGEKYQALNSRSLIGRPQWKLLFEEVAKSSRG  
KTVGVFCCGPKGISKELHKLCNSANQYGTTFEYNKESFT

>chicken-Gg-Nox4: DDBJ™ No. BR000274

PSYLTLPVVFVQLGLCVSRASASVLNLCCLVLLPMCRIILAFLRGSQKVASRKTRRLIDKSKTFHVT  
CGVTVCIFSVLHVA AHLVNALNFSENYNEDFLAINAANYRGEDPRKLLFATVPGLTGVIMVLVFL  
MCTASTYAIRVSNYDIFWYTHNLFFVFIYLLMLHVSGGVLKYQTNLEEHPPGCFNPNKTLGNMTV  
PKSFEELFPDYTTEPFPELDFPQPLVQSNFMRICSKEPKFQSHFPETWFWISGPLCLYCVVERLYRI  
RSNKPVTITSVISHPSNVLEVRMIKDDFRARPGQYVILHCPRVSGLESHPFLLTMVRNKNTKATFGV  
HLKVVGDWTERFRDLLLLHSNQDAEILPIFQQRHYPKLYVDGPFPGSPFEESLNYEVS LCVAGGIGV  
TPFASVLNALLDGWKCYKLRRLYFIWVCRDVESFRWFADLLCMLHNKLWQENRPDYINIQLYLSQT  
DGIQKIIGEKYQALNSRLLIGRPRWKLLFDEIAKYNRRKTIGVFCCGPKMSKILHKLSNNSNPYGT  
RFEYNKESFS

>medaka-Ol-Nox4: Ensembl No. ENSORLP00000013799

MAVSVRSWLANEAGKHFVLMWLWLAANTWFLDITYLLYSTGQQYHYLYQMLGLGLCISRASASVLN  
LNCSLVLLPMCRLSLTFIRGSHTMSTRMRRLLDKSKSFHVACGIAICIFSAHVSAHLINVVNFSAG  
FSEDFPALNLARYKGEDPKLIIFTTIPGVSGVLLVLLILLLMFISSSH CIRVCNIEIFWYTHNL FIVFYII  
LMVHMAGGALKFQTNIEAHPGCLRASQSLRQQQQAEDLDQKQRCKEDAHFQPHYPQTLWVVS  
GPLCLYCVVERFYRIRSSHPVTIVTVIRHPCDVVELRMLKKNFRARPGQYILLNCPGVSPFENHPFT  
LTACPTENKQTFGIHLRIVGDWTEHFAHLLLPQPRAALEILPVVHQRRYPTLYVDGPFPGSPSEEVFN  
YDVS LCIAGGIGVTPFACVLNALIPSERWQSFRLQRLYFVWVCRELQSFYWFAELLCALHEKLWQD  
NRPDYLNKLYVTQKDSLQSMSELRYRPLAARLQVGRPKWKLLFDEIGKSNKDKRVGVFCCGPKG  
ISRTLHRLCNSAKSSGATFEFNKESFS

>fugu-Tr-Nox4: DDBJ™ No. BR000275

MSVRSWIANEGGKFLVLMWLWLVNTWMFLNTFLLFSSGEQYYYLYKMLGLGLCISRASASVLN LN  
CSLVLLPMCRLSLKFI RGTHTVSSRKTRRMLDKYKTFHVACGLAICIFSAIHVSAHLANAANFSTSY  
SEEFPSLVNARYRGEDPKWIILTTPGVGTGIVLVLLILFLMLMSSSN CVRSFNIEIFWYTHNL FIVFYIV

LMVHMGVGLKYQTNIEAHPGCLTANQSNMDPQAKEMEKADNEERRCTEEAHFQGHYPQTWI  
WLSGPLCLYCAERFFRYIRSCDPVTIVTVIRHPCNVIELQMLKNKFAARPGQYILLNCPAVSSFENHP  
FTLTTCPTENKKTFSIHLRIVGDWTERFTQLLLTGSRTDMKTLPMVQHRKYPKIYVDGPFSPSED  
VFNYDVSLCVAGGIGVTPFACMLHTLLDRGWTHFRLQRLYFVWVCSELQSFYWF AELLCSVHHKL  
WQENRPDYFNMKLYVSQTDSLENMSAKYRPLTSRLLVGRPRWKLLLNELGKTNKHKRIGVFCCG  
PKAISRTLHRCNSFQSSETVFEFNKES

>zebrafish-Dr-Nox4: Ensembl No. ENSDARP00000079892

FSARFSQLLLQPSNSSEILPMMHQRRYPTVHVDGPFSPSEEVFNIEVSLCVAGGIGVTPFACVLQA  
LYDDWCHYKLRKLYFVWICRDIQCFYWFADLLCGLYEKLWRDNRPDYLNQVLYLSSSQGLQSIGEE  
RYRFLSSRLRIGRPNWKLLFQEIGRANQLKRVGVFCCGPKGISKALHTLCSNSPHSHTAFEYNKES  
FS

>tetraodon-Tn-Nox4: Ensembl No. GSTENP00010317001

QCPTEKRKTFSIHLRVVGDWTERFTQLLLPGSRDLKILPVVQQRQYHKIYVDGPFSPSEEVFNIDVSLCV  
AGGIGVTPFACVLHTLLDGWTHFRLQRLYFVWVCRELSFYWF AELLCSVHHKLWQENRPDYFNMKLYVS  
QDTLQVMSEEKYRPIITSRLLVGRPRWKLLLNEVGKTNKHKRVGVFCCGPKAISSTLHRLCNSFQSSETVFE  
FNKESFN

>ascidian-Ci-Nox4: GenBank™ No. NM\_001033829 (Chromosome 6q: 909K)

MQLKNYLVNDGLRFLIWWAWISINASLFYFTFMYYNGIQFYLLHQMLGYGLCISRASAACINLNSS  
FILFPMCRGLVTFMRGLPRGVGRQVRRLDRGRSFHILCGYILCLLAGVHCAAHAYNAVYFSKYNN  
SRYKDLNVAKYSNQNPMLLVTSLSGITGILLVVISLVISAFASRPIRRNNHNKFWKTHHIFIVFYALI  
FIHAMDGVIKYQTNVDQHKPGCFILIDQTNNTSNISMVQPEPEPFNHPMSVVKPMVAVPEPPHRE  
PFPNMKLASKMPSKTDKFMNNTAPQPHHVIMPEPEPMPHKGAGAPNTRIFVHGSWVEVME  
CVQPPPKFSSCRQEAWLWLCAPLIYVIERIGRHRSSHVDVTTIVKFIEHPCDVIELRLYRNGFSAKP  
GQCIWVRCPQLSKVESHFSLTSVPSKDDPTFGIHKVLRGDWTEELRDLMVRELNPVVEILKDKII  
AGGNFLEKDDDELNSRGETEYKCNPDNSQYLATMASPNQSINKPCMVNFRFTQETDFQMCTLSN  
STISVYDNHEMPHTQENIDDQTCKKTSSTCLSQYSLESESRNLPKSTTLHSDKQQLNETTLYS  
EDQRNVPKSTALVSEACSTKNDIHLPCNQTVSKQLPILCVGPTGGAMEDIFKYKISMVAGGIGVT  
PYASVLNALLKDEDLFSRMKLRKLYLIWSCKDPRSFWSFASLIRDVQIVLWKRNCDDLVSRLHITG  
SNTLQSEESGDQLLSDIQGCHVAYGRPDVTQVFEEIRTAQYQRSTVGVFCCGHRLVSSVKHHCL  
KTKSSKVKFLFNKEAF

>mosquito-Ag-NoxM: GenBank™ No. XP\_310312

LLWTGFNFVVFCKAFSNNYHHDVEYYLSRILGNGLCVSRGTAPVLNVTMALITLPTCKTFNLLLHK  
LFGRCSTRLLVHYLEKTKVLHLILGCSLLIVAIVHSVAHFVNIVNFIDNYDEREINWANGPDDNV  
LRLLFATPTGFGSCIMLLTLAAMAYLARRSMRDRFYNSFFTSHHLFLVFGMMFYHPLRLVHGGST  
LND AIDRFNIIKHQTNVDKHKIMCDLVDNVTLHSNEDLLVLCEPPQFSAGTKRAWIWPLVGLAIY  
LADISFRYLTSHSERYRVTTVQTYAMAGHAIHLRLQFCRKAMVKILPGQYVLLQCPAISTLEWHPFT

ITELPIEGRNDITLTIKVRGDWTEELYDRIVQREQCKRNLGGVDPYRRIEFLLDGPYPVMSNMLDC  
KRILFVGAGVGITPFVTIMRLLSSNVDPARVHLVWIARNLETFLWFSDEIARLQEKFWSQNKPD  
FWVKLYWTQNYDEHLLAECFGDMPSIKSRMHRGRPNWNVDFIDLVTLYPKKSVSFVSCGPKELTK  
EIRLKCKEYSKHGCKLSYFHEGFG

>mosquito-Ae-*NoxM*: GenBank™ No. EAT37894

MAIITLPSRSFNVLLNALFGRWSIRALVFYLEKIKVLHFLGTGLIIVGVIHSIAHFINIINFVDNYDA  
KFDAINWATGKDDSKLRLLVATPTGFSGCVMLVTLFAIAYFSSRQMRDRFYNSFLASHHLFLVFGM  
MFYHPLSNIIKHQTNLKAHPNGCDIIDDHVFRNDSVLQAICSEEPKFSAGDKSAWIWPLMGLSIYIL  
DIIIRYLIAHSDRRKVSTLQSYVLPANGVYLRLRFTSSKRIVISAGQYVLLQCPAISTLEWHPFTVVDV  
SIHNTVSLTVAVRGDWTQRLYDLVSEKERLKQSGAGHDALGRLQFLLDGPYPSAMTGMLKCKRIVY  
IGAGVGITPFAGFVRHLLNFNTDRPSRIHLIWIWRKAEMFTWFADELKRLQERFWKQNKPDRFTLK  
LFLTRNYNVNVIDEYFGDYPTLKARINKGRPNWDEVFLDLTALYAGKSVTVFSCGPKGMTKELKG  
MCREYRKHACKFTYLHEGFG

>human-Hs-*Nox5*: GenBank™ No. AF353088

MNTSGDPAQTGPEGCRGTMSAEEDARWLRWVTQQFKTIAGEDGEISLQEFKAALHVKESFFAERF  
FALFDSDRSGTITLQELQEALTLIHGSPMDKLFQVYDIDGSGSIDPDELRTVLQSCRESAISL  
PDEKLDQLTLALFESADADGNGAITFEELRDELQRFPGVMENLTISAHWTAPAPRPRRRRQL  
TRAYWHNHRSQLFCLATYAGLHVLLFGLAASAHRDLGASVMVAKGCGQCLNFDCSFIAVLMRRC  
LTWLRATWLAQVPLDQNIQFHQLMGYVVVGLSLVHTVAHTVNFVLQAQAEASPFQFWELLLTTR  
PGIGWVHGSASPTGVALLLLLLLMFICSSCIRRSRGHFVYFWTHLSYLLVWLLIFHGNFVWKWLL  
VPGILFFLEKAIGLAVSRMAAVCIMEVNLLPSKVTHLLIKRPPFFHYRPGDYLYLNIPTIARYEWHPF  
TISSAPEQKDTIWLHIRSQGWNTNRLYESFKASDPLGRGSKRLSRSVTMRKSQRSSKGSEILLEKHK  
FCNIKCYIDGPYGTPTRRIFASEHAVLIGAGIGITPFASILQSIMYRHQKRKHTCPSCQHSWIEGVQD  
NMKLHKVDFIWINRDQRSFEWVVSLLTKLEMDQAEAAQYGRFLELHMYMTSALGKNDMKAIGLQ  
MALDLLANKEKKDSITGLQTRTQPGRPDWSKVQKVAAEKKGKVQVFFCGSPALAKVLKGHCEK  
FGFRFFQENF

>dog-Cf-*Nox5*: DDBJ™ No. BR000277

DPAQPDLESCRGTMSTEEDAKWLQWVTHQFETIAEKDREINLQQFKTALNVKEAILFAERFFTLFD  
SDGSGTITLQELLEALTLIHGNPMDKLFQVYDVGWARQGGVCRYRVGPSTRPHSAASPLGT  
GSGSIDADELRTVLRSCMRESAISLPDEKLDQLTLALFESADKDCNGAITFDELDELQRFPGVME  
NLTIRCGSASRVGTARVQVPLQLRRLALTWAYWHNHRSHLLCLAAFAGLHLLLFALAASEHRARGA  
SVMVAKGCGQCLNLDGSFIAVLMRRCCLTWLRATWLAQVPLDQNIQFHQFVGYVVIVLSLVHTVA  
HIVNFALQAQAEASPFQFWELLLTTRPGIGWIHGLASPTGVALLLLLLLMFACSSCIRRSRGHFV  
YWTHLSYLPWILLILHGNFVWKWLLVPGTLFFLEKIIGLAVSRMAALCIVEVNLLPSKVTHLLIKR  
PPLFHRYRPGDYLYLNIPTIARYEWHPFTISSAPEQKDTIWLHIRSEGGWNTNRLYESFKTSCPMDCDP  
KPLSRSLKMRRSQRRPEVSEKSSENHLFCNIKCYIDGPYGTPTRRIFASEHAVLIGAGIGITPFASILQ

SIMYRHQKRKNICPSCQHSWMDSAQDEDMKLHKVDFMWINRDQRSFEWFVSLLTKLEMDQAEIS  
QEGPFLELHMYMTSALGKNDMKAIGLQMALDLLAKKEKKDSITGLQTRTQPGRPDWNKVQKVA  
AEKKGKVQVFFCGSPALAKVLKKGHCEQFGFKFFQENF

>cow-Bt-Nox5: DDBJ™ No. BR000276

MSAPGDTAWTDSEGFRGTMNAEEDAKWLQVWTHQFKTIAGEDGEINLQDFKKALKVKESFFAER  
FFVLFSDSGSGTITLQELQKALTLIHGSPMDKLKFLFQVYDVGKHPLWDGRRRTQREGQRERPVS  
VTAQHWASSSPETGSGSIDADELRTVLQSCLYESAISLPKEKLDQLTLALFESADKDCSGTITFEELR  
DELQRFPGVLENLTISAHWTTPPAPQRHRRQPRLLTSAYWHNHRSHVLC LAVFVGLHMLLFALAA  
SAYRAFGSSVMVAKGCGQCLNFDCSFI AVLMLRRCLTWLRATWLAQVPLDHNIQFHQLMGYVVV  
GLSLVHTVAHVNFALQAQSETSPFRFWELLTTRPGIGVWVHGSASPTGVALLLLLLLMFACSSSCV  
RRSGHFEVFWYTHLSYLP MWLLLILHGPNFWKWLLVPGTLFFLEKTISLAASRMAALHIVEVNLLP  
SKVTHLLIKRPPLFHYRPGDYLYLNIPSIARYEWH PFTISSAPEQKDTIWLHIRSQGQWTNRLFESF  
KKPEPVFCGSKRLSRLEMKRSQRKPQVSEMSENHQCNIKCYIDGPYGTPTRRIFASEHAVLIGA  
GIGITPFASILQSILYRHQKRKHICPNCQHSWMESGQDEDMKLHKVDFIWINRDQQSFEWFVSLLT  
KLEMDQAEETQVGRFLELHMYMTSALSKNDIKAI GLQMALDLLAKKEKKDSITGLQTRTQPGRPD  
WNKVQKVA AEKKGKVQVFFCGSPALAKILKKGHCEQFSFKFFQENF

>opossum-Md-Nox5: DDBJ™ No. BR000304

MNADDDAKRLEWVSFQFEIAGEDREIDLQEFKALKVKESFFAERFFALFSDSGSGTITLQELLGA  
LNLLIHGNTMDKLKFLFQVYDVG L CYRSYSPSTGSQWSLGKCSSPLGHGNGSIDPDELRVVLQSC  
LKESAISLP EEKLDLTLALFESADKDHSGSITFEELQEELDKFPEVMENLTISAANWLKPPSSKKR  
PQIPRHLSAYWHNNCGKLAVLAVYIGLNILLFTLAALKYQSSGTRIMIARGGGQCLNFNC SFIVVL  
MLRRCLTWLRATWLRVPLDQNV EFHQ LIGYVVVGFSFLHTTAHVNF AQLAQSENSTFQFWEY  
LLTTRPGIGWVYGTASLTGIVLQLLILIMLVCS CSFVRRSGHFEVFWYTHLLYISIWALLIVHGPNFW  
KWLLVPGLLFFLEKVGLVLSRMAALSIVEVNLLSSKVTHLVISRPPFFRYKPGDYIYLNIPAIKYE  
WHPFTISSAPEQEDTIWLHIRSQGQWTNRLYEYFKAADPICLGAKRLTQSLKLRRSQRKSQKEGPS  
PVNENHRFCIKICYLDGPYGTPTRRIFASEHAVLIGAGIGITPFASILQSIMYRHQKRKHICPNC HYS  
WCEDIRDDFLIFKVDFIWINRDQKSFEWFVSLLTKLEMDQAE EHGHHFLELHMYMTSALS KND  
MKAIGLQMALDLLAKKENKDSITGLKTRTQPGRPDWSKVQKVA AEKKGKVQVFFCGSPALAKVL  
KSHCEQLNFKFFKENF

>chicken-Gg-Nox5: DDBJ™ No. BR000278

LLALQAPGTMGTAEDA AWRWVTERFQSIAGHDEEIGLEEFKAALQVKESFFAERFFALFDVDGSG  
TISLAELHGALALLRGTAADKLRFLFQVYDVGSGSIDAAELLLVLRACLRESAISLPQRLHDMA  
RVLLEAADQDNGSITFQELQQQLEAVPGLMESLTISAASWLKPPAPTRHSRRPRCPTSRSWHNHR  
GQLAFLGGYVSLNLLFTLAALRHFGGSGWVAAARGCGQCLNFNC PFIAVMPMLRACLTRLRATPA  
GRALPLEHCVALHQPVGSAVLALAVLHAGAHVANYGR LAQDGHGALSEFLVARPGGGGFGGTAP  
QTGLALQLLLFAMLA FSSPCVRRGGHFELFYWSHLSYVPVWALLLFHAPNFWKWFLVPGGLFVLE

KAVGTAVSRAVGLRIVEVHLLPSQVTHLVIQRPRSRFEPGDYIYLNIPAAAYEWHPFSSSAPEQQD  
TIWLHIRSLGQWTTTRYEFFRQPEPLQPHGNLERKGGSGCRWVSAGLCFLQAQRLNRAVCRLQG  
GLRAVPVGRSAPAARSTQHRLGLSKKGNKNHTGDAAIELTSYRRSGAPTTTRGTEDGDRDWDTSL  
QAVGASTAPKPPRRPQGRGGPSLSCDARCPNDFGIEVGVHRSISHHSHWAQGSWESGCGECWKLW  
EQGGGGFPLLLMDAPHLQVSVGPGESQQLCSEIKVSSGERNGVGAVLSRVLALPRAEHPASVLGLSP  
CFWVLSLYLSQCYIDGPYGTPTRRIFTSEHAVLIGAGIGITPFASILQSIMXQVGPYRQRKQSCPCSET  
VWDEDMALTKVDFIWINRDQQHFVFLDLLAALELQQEEQDPGGRFLELHLYMTSALGRSDVKA  
VGLQLALDLLAAKEQRDSITGLRTRTQPGRPDWSQVLGRVAEERKGVHVFVFCGSPALAKVVRMH  
CERFGFRFFKENF

>frog-Xt-Nox5: Ensembl No. ENSXETP00000017078

TMSTEDDSKWLEWVTKQFENIAGDDKEIDLEEFKTALKVKESFFAERFFALFSDSGSGSISLDELL  
KALNLLIHGNETDKLRFQVYDVIDWCLCPPTGSRTDSEWNSRHTVHWQCLEPFSFPGSGSIDPS  
ELRTVLKSCRESAISLPEEKLDDTLVLFESADKDHSGSITFQELKEELERFPEVMENLTISAANW  
LKPPAVQNKSHTPRYLTRTYWHNNRSLKLLFMCCYWCLNVLLFGLAAVNHASLGGWIMVAKGCGQ  
CLNFNCTFIVMMLRRCLTWLRTTCVVRFLPLDQNVVLELIGYVIFVLTVIHTAAHVNTNFTLINLT  
EKTGAYTFWEYLLTIRPGIGWISGTASITGILLQLLICMLLFSNTFVRKGGYFEVFWYTHLSYIWIW  
ILLFLHTPKFWKWFLVPGLLFLEKLFGAAVSRTGDVYITEVNLLASKVTHLVIKRPPSFQFKPGDY  
IYLNIPVIAKYEWHPFTISSAPEQADTIWLHIRSLGQWNTNSLYEYFHYPQTVNRHETKRQILTQKNR  
QHHSQVSANDMKCSYDMFNHRHQFIDRYCYIDGPYGTPTRRIFTSDHAVLIGAGIGITPFASILQSIMY  
RYRMRKQNCPCSQYSWCETLKENEMDLRKVDFIWINRDQKFFEFVSLTKLELDQADEEPDET  
GRFLEMHMYMTSALSKNMKAIGLQMALDLLAQKEKKDSITGLRTRTQPGRPDWNKVFKIEQE  
NKGKVQVFFCGSPALAKIIKAHCEKFNFKFFKENF

>fugu-Tr-Nox5: DDBJ™ No. BR000279

FFAERFFALFSDSGSSSISLDELLKALDLLIHGSETDKLRFQVYDVGSGSIDPDELRIVLKSCLR  
ESAISLPEEKLDDTLVLFESADKDKSGAITFEELKAELESFPEVMENLTISAANWLKPPDLEQKKQ  
NHTPRYLTRAYWHNNCRKLLFLCMYAFFSLMLFVNAMLQHSYGGGWYMWAKGCGQCLNFNCTFI  
MVLMLRRCLTWLRTWVVRVPLDQNILHQIVGYAILFYTLHTSAHIFNFVQLSESSGFTLWEYL  
LTTTRPGIGWVKGTASVTGVVLQFMICMLVCSSTFVRRSGHFEIFYWSHLSYVWVWILLMVHCANF  
WKWFVAPGFVFLLEKIIGIAVSRMGGLYIVEVNLLPSKVTHLVIKRPQFFHFKPGDYVYINPEIAKY  
EWHPFTISSAPEQSDCLWLHIRSMGQWNTNRYEYFRQLDRQTVSTKRLSVTLRKHRQLPKAKVHT  
DTQRHLRPVAQLFTLTCVSSPQDEVFSSAKSNKAVAFNEDDAVTLMMYQQRSSGADVVSAPAESQ  
VPPEPLLEDELSAERGEAPPLREVRDHIKGLLGLLFYSNKGFNLSLYCRFLQSLIIGSATSRSKA  
QLRNAANKMHLNNFLFKMSFLADEGKQENHSLVSDLSVTYDIEQILLKTSAHTDTEESVKTSDAH  
SMTLYRFQCYVDGPYGTPTRQIFASEHAILGAGIGITPFASILQSIMYKYRRRKQNCPCNYSWCEN  
LKSDMKLRKVDFIWINRDQKSFVFLTKLEMDQADEEPEGRFLEMHMYMTSALSKNMKA  
AIGLQMALDLLAKKEKRSITGMRTRTQPGRPDWGKLFQKVSEEKKGKVHVFYFCGSPALAKVIKA

QCEHYKFNFYKENF

>tetraodon-Tn-Nox5:Ensembl No. GSTENP00000868001

MLQHRSGAACYMMLAKGCGQCLNFNCTFVMVAARAPAGRGLEPRVKRASPTCVQVLMMLRRCLTWL  
RATWVVVRVPLDQNILHQQVGYAILFYTLHTCAHVFNFGTPHTHARTVFPDAEGTCACFPALQ  
RTSESSGFTLWEYLVTTTRPGIGWVKGTASLTGVVLQLLIGLMVLCSSTFVRAHGHFEVFWSHLSY  
VWWALLMVHCANFWKWFVPGFVFLLEKIVGIAVSRMGGLHIVEVNLLPSKVRWTHGWVWASH  
VVPSAMAGRCVCVRPQVTHLVVRRPQFFHFKPERYVYINPEIAKYEWHFPFTISSAPEQSGTCRRRA  
RKPPGLTGTNAPVDPLRFLRTPQLGGVVGEGDCTLSSPRRLPVAPHLHGPDVQPPVRVLPGTG  
EPDLQQHQEADGEPEKAAAAAEGPGFGQVWRQSSVLQHQVLRWDYGTPTRQIFASEHAILIGAGI  
GITPFASILQSIMYKYRRRKQNCPCNYSWCENLKSDMKLRKVDFIWINRDQKSFEWVSVLLTKL  
EMDQADEEPEGRFLEMHMYMTSALSKNMKAIGLQMALDLLAKKEKRDSITGLRTRTQPGRPD  
WGKV

>zebrafish-Dr-Nox5:Ensembl No. ENSDARG00000011667

IINVLSGSIDPDELRTVLKSCRESAISLPEEKLDDTLALFESADKDNSGSITFEELKAELETPE  
VMENLTISAANWLKPPDLEQNKRKTPLYLTRAYWHNNSRKLFFLCYGLLNTFLFIMAMLKHAD  
GGLWIMLARGCGQCLNLCNCTFVMVLMMLRRCLTWLRATWVVVRVPLDQNILHQQVGYAILFVSVG  
HTGAHIMNFARLSQNDGAYQLWEYLFITIRPGIGWVNGTASITGVVIQILIGLMVVCSSTFVRRSGHF  
EVFYWVSHLSYIWSALLVHVCANFWKWFVVPVGAFLIEKLVGIAVSRMGGLYIVEVNLLPSKVTHL  
VIKRPPFFQFKPGDYVYINIPTIAKYEWHFPFTISSAPEQQETLWLHIRSMGQWTNRLYEYFRQPDQ  
TNKRLTASLRSRRHQSAQLTAKLSENHRYCNICYVDGPFQTPTRQIFASEHAILIGAGIGITPFAS  
ILQSIMCRYMRKQNCPCNSYSWCETIKDNEMKLRKVDFIWINRDQKSFEWVSVLLTKLEMDQAD  
EEPEGRFLEMHMYMTSALSKNMKAIGLQMALDLLAKKEKRDSITGLRTRTQPGRPDWAKVFQK  
VSEEKKGKVHVFCYCGSPALAKVIKAQCERFGFHFYKENF

>rabbit-Oc-Nox5: DDBJ™ No. BR000301

FLELHMYMTSALGKNMKAIGLQMALDLLAEKEKKDFITGLQTRTQPGRPDWVNFQKVAEEKK  
GKVQVFFCGSPALAKVLAHCADFRFRFFQENF

>armadillo-Nox5: DDBJ™ No. BR000302

MWLLLHVHGNFWKWLVPGLLFVLEKAIGLTASRMAARYIMEVNLLPSKVTHLVIKRPSLFHYRP  
GDYVYLNIPYIARYEWHFPFTISSAPEQKDTIWLHIRSEGQWTNKLYESFKASDLVGSKRLSRSLR  
MRRCSRP

>medaka-Ol-Nox5: Ensembl No. ENSORLP00000017662

KHSQGSNVVVLVSSGCSGVSCIMSVDEEDARWLEWVTKQFESIAGDDKEINLCEFKTALKVKESFFAE  
RFFALFSDSGSISLDELLKALDILLHGTETDKLRFLFQVYDVDACFMMKVTGSGSIDPDELRTVL  
KSCLSESAISLPEEKLDDTLVLFESADTDNSGSITFEELKEELENFPEVMENLTISAANWLKPPDL  
DQNKHQTPRYLTRAYWQNNRKLFLFGYGVNLLLFFVAMLRHSDGGVWLMVARGCGQCLNFN  
CTFIVVLMMLRRCLTWLRATWVVVRVPLDQNILHQQVGYAIFCFSLGHAIHVVNFDLTSTNLSQHS



EFLLWEYLLTTRPMIGWVKGTASLTGVVLLLLICLMVLCSSTFVRRSGHFEVIFYWSHLSYIWVLLLL  
IVHCANFWKWFVVPGLLFLEKIVGIAVSRMGGLYIVEVNLPSKVTHLVIKRPQFFHFKPGDYIYI  
NIPVIAKYEWHPFTISSAPEQSDTLWLHVSRMGQWTNRLYEYFRQTDSMELCSGRLATSLKRRRQQ  
AKAEVSAKFAENHRVCNIKCYVDGPYGTPTTRQIFTSEHAVLIGAGIGITPFASILQSIMYRYRLRKQN  
CPSCNFSWCENLKSDMTLRKVDIFIWINRDQKSEFWFVSLLTKLEMDQADEEPEGRFLEMHMYM  
TSALSKNDMKAIGLQMALDLLAKKEKKDSITGLRTRTQPGRPEWKGKVFQKLSKENKGVHVFYC  
GAPSLAKAIKAQCERFGFNFKENF

>sea urchin-Sp-Nox5A: GenBank™ No. XM\_001177608

MATARRKSSLAFFSSVCGNAQPADEDSQWLSWAEEKQFCQIAGEDRQIDEDEFKMALNIKKSSFAERFFHLFD  
QDGSYISLDELMEGLYLLTKGDPVDKLRFLFSVYDVGNGAIDHEELKVVLRACLCESSMTISEATIDALT  
SALFEAADTDGSGAISFEELKEELEKNPDVMENLTISAASWLKPPSLKPSRRVLPYLTWRYVHNNYRKILFL  
VVFILINVALFTEAAYRYAKKSNWCLITARGCGQCLNFNSAFVLVLMRKTITTLRTTKAAEILPTDQNIIV  
HKLVGIFIALLSGIHTLGHIGNAWFVEKTTDGNVTMSALLFTNPHLTSGLAPVSGSAFLTGWVLDIILAIMVI  
CSMPFVRRSGHFQVYFTHMLYVVFVWGLLLIHGPRFWYWFVVPGIIFIVEKLSQTKCVKQARYGKTYVQEV  
NLLPSGVTHLALTRPNRFHYKAGDYIFINIPQIAQYEWHPFTISSAPEQQGTISMHIRSAGNWTNRLYAFFEDR  
QKRNRDETELLLSASDIRVAMETEEVEETNHAGEFIRLREMECDAAEADVVKPTLNHRGANGNLPGLPR  
GYSVEREESEDNQHQHRTIACQTTFEMKGAKSWRSSLREEKIQVFIDGPYGTATRIGIFQAEHAILVGAGIGVT  
PFASILQSIMHRYRVGRQTCPICQHTWLGNIPTDMMRLKKVDIFIWINRNQNAFEWFVSLLTQLEMEQAQEPF  
DRFLELHMYMTSAMAKNDMKGIGLQMALDIMHKKGHRDLITGLKTRTQPGRPDWNKIFTQIAREKKGKV  
QVFFCGSPTLAKIIKKSCEKFNFSFKENF

>sea urchin-Sp-Nox5B: GenBank™ No. XM\_780967

MAGMQEKDEKWLVKLEKHFQEVAGDDNLIDLDEFINALNVKKSFFAERFFELIDTDQSGSISLDELIGALRL  
LVNGTEQEKLHFLFQVYDVGSGFIDFDELKTVLRSCAESAATLTCDETLTELTEILFDDADVVDGGEVSFE  
ELSEQLQRYPGITSNLTISYNLNRNHFVWIFVVMINAGLAAWGAYEGYQSVSDERHPAAISIARSAGRCL  
SFECFVLVLMRKLTLTILRNTFLMSVPLDQHVVIHKIVAVFIIISVIHTAGHIANIGLIYQVENVNGTTAA  
WILDVLRPFPLGLVEGSCIITGILIIIVLIIMTICSLPFIRNNGYFKVFYWTHQLCIVFWCLIIHSKYFWIWFIA  
PGIILAERLVRLQFFRRARFGKVVYIQKGYVLPANVVQLVIQRPKFKFHAGEYIHVNIPIASHEWHPFTISS  
APEQQEYLTLHIRCVGHWTKRLYDVVRERELTLEHENAGFGGEIDKDHDEPLEVIVDVSSTKSTTAVEPNGQ  
QSIISDTHSNRNGRRSSQTYSKRRRTASGAINSGFEPELNGDKDGTCTVTEGKPYNTGQNDNESVTQKVNA  
AQLSLPRKADHPSASQGDCQPMSEKELGEVSMTELVNGDSFKMKSLNSRQSIDVQEAPRGSTTKRQSLRVR  
QSLVGREKRSVCGKPNGDVNRKMSLVTLRRNGARHSLDLSKDLGGRPHTGLEVILDGPYGAPAHIMEAE  
HAVLIGAGIGITPFASILQINERYKAARKHPCNCHTWVTDSSSILKTKKVDFVWINRDQHSFEWFISLISAIE  
LEQAEIPAADRFLDIHLYMTSALSPSDMKAIGLHVALDLIHKKKKRDTITGLKTRTQAGRPDWDEVFQNLKQ  
QHKGKITVFFCGSPALGKVLSTKCLQYQMEFRKENF

>fruit fly-Dm-Nox5: FlyBase No. CG3896

MDFAEQIESVAYVICGENKRVSFKNFRDIWHTRGILDKLYRLIELDGSNLVSTNQVMEFISHLTNSR

PRTGFDKSSSLARLEQLFRTTVGNEQEIRREEFQKIVTSKNPFFTERVVFQIFDKDNSGSISLQEFIDAI  
HQSFGQSADDKIRFLFKVYDIDGDGLIQHKELHDVIRHCIKENGMFSEDQIEDLTSAMFEDADPH  
NSGEITYEALKNQLHKGGLLENLSITDRWLVPPIAEDRQAGGAAKSGFWNSLPHQFSLAYMKNN  
QVFVTYLFFYITVNLCLFISRAIQYRASNGFVIARACGQCLNFNCAWVVLVLMRLRHSPLYLRGRGLSS  
YPLDHHVYLHKLGTITISVLSLIHTIMHLFNFSIIVINDPNINAGHYTIGEWLLTDRPGLFGLIPGCA  
NPTGVALLAILVVMFVCSQPFVRRKGSFEVFWYTHLLYVPPFWILCLFHGPNFWKWFLLPGLVYIVE  
RALRFIWMRGEHGKTYISSGLLLPSKVVLVIKRPFFFNFRPGDYVFNIPAIANYEWHPFTISSAP  
EQEDYMWLHIRTVGWETNRLRYRFEREQQKLQSSGSSQEIQHMHAIPTPSFMLLNEARNPAIAG  
ERSATPQTDFLAKNLGVQAVPPVRRPQRNRKPAPGAPIDPPATGVNRIRSIKKTQRFTSRKEAVDP  
KKGIPNGAFIADGEREDSNLQRPLEKSISLPDISVKSCKRSRLKALRALGRSESESAFDEKRVRA  
RNNSVGLAYLSPQNKSLAQSFYMRMTPKPTIAFKTSPMEEREHQVAAGEANGASPASRAEQGLSS  
RMDSADKLQLARLSAEGASKPLEDQTQTGSPSRKSILRRPTFLRSLASINNRTGGGGGGSTGSS  
TTNSGGKVTLDAGVMEIFIDGPYGAOSSHIFGAQHAVLIGTGIGVTPFASILQSIMHRYWKARHSCP  
RCQFEWASEIPKSVMLNRKVDFFWINRDQRSFEWVFNLLSQLEIEQAEELGGAMERFLDMHMYITS  
ALQRTDMKAVGLQLALDLLHEKGKRDITGLKTRTNAGRPNWDKVFQQLQAQQKGVTVFYCGP  
PQLAKTLRYKCDQYGFARKECF

>mosquito-Ag-Nox5: DDBJ™ No. BR000280

IDFAEQLESVAYVLCGDGTVTYDKFCQIWHAKGILDKLYRLIDVDCNTLNISTNQIMEFISNLTNSRPR  
TGFDKSSLERLEQLFIKTVGNEKEIRREEFKKIVTSKNPFFTERVVFQIFDKDNSGSISLQEFIDAIHQ  
FAGQSPEDKIKFLFKVYDLGDGLIQHRELQHVMRACMEENGMRFSQIEDLTMAMFEDADKY  
NRGAITYEALKNQLEKHGGLLENLSISIDRWLVPLPQEDTKKKRKKKPLPHQLTAPYIKNNYVYLS  
FLTFTLINVGLFVSRAIQYRNSNGFVIMARACGQCLNFNCAFILVLMRLRQCITFLRTRGFTAFLPLD  
QHIYLHKLTVLVVAIFSLVHTIMHLFNFTTIVVYDPVLNANNYTAEWLFTARPGLFGLIGGCANPT  
GVVLVLLILLIMFICSQPFVRRGGSFEVFWYTHLLYVPPFWILVLFHGPNFWKWVIVPGLIYLVERTIRL  
VWMRTEHGKTYISSGLLLPSKVTHLVIKRPPLHFCFRPGDYVFNIPAIQAQYEWHPFTLSSAPEQEDY  
IWLHIRGVGEWETNRLHNNFFEREQERLHNGEIPALVAGRVGGAGGPVGPAGDATTAGIMKQRHP  
PGTSKLAMEGYSAPSPVATSTAQPAKFERQMSDNRAFKKIQATLQRTFSRRDQLIPRSGGAGGVGGI  
ANEGFSGDGQKVPLEKSLSPDMQNKFKKRERMMVLEMYMRSESESFDEVQIRKARLQSLGLA  
YLSQNKSLAQSFYMRMTPKPTIAFKTSPLENCEPRDSTNSIVVSPGVFTQKDAEEGRTAGALPTSG  
AASSVAVGSGAASAASSNPASRPVNYVPGKPLEIYIDGPYGAOSSHIFQAQHAILIATGIGVTPFASIL  
QSIMHRYWKARHCCPRCSYEWSSSEIPPTIMNLRKVDFFWINRDQRSFEWVFNLLSQLEIEQAEELGS  
AMERFLEMHMYITSALQKTDMAVGLQLALDLLHEKEKRDITGLKTRTNAGRPNWDKVFQIQI  
DQKKGKVTVYFCGPPQLAKTLRYKCDQFGFQFRKEVF

>honeybee-Am-Nox5: DDBJ™ No. BR000281

DLIIQFENVAYSICCDNPVTFEKFQQIFSTKEIIDKLFRRIDEENLGYITSFQIMEFLSNISDTRPLAGF  
DKRSLEWLEKIFKQTVGNEKEIRREEFNKIVTSKNPFFTDREVVFQIFDKDNSGTISLQEFVDAMHQF

AGKSPDDKIKFLFKVYDIDGDGLIQLRELEHVMRACLEENGIRFSEEQIEELTMALFDDADQSNRG  
AITFEALKKQLEKHEGLLENLSISIDRWLVPPKPKESKRKSRLLQLLASLRPYQLTKPYMKNNYVYIFF  
ISIFILINVSFLVSRLYEYRKSNGYVMLARACGQCLNFNCSFILVLMRQCITFLRTHGFNSVPLDQ  
HIYLHKVTGGGLICVFSIAHTLMHLLNFGTIVYDEILNHNNYTLSEWLLTSRPFGLVGRYANPTGF  
ILVILFLIIMICSMFVRRGGCFEIFYWSHLLYIPYWILVILHAPNFWKWFIFGGLIYLLERIRRIAWSR  
SQLGKTYISSGLLLPSKVTHLVIKRPPHFVVFHPGDYVFNIPVIARYEWHFPTISSAPEQEDYIWLHI  
RAVGEWTNSLYSYFEKEQMKLQRDNIFPIENRNNPNVSESVSMNGKFLSPIPRGNRRSFDNSV FVS  
DDEKITQSPQSVIGNLKFQIYNLSITDVKKMSNNRKLHSLLVSKMPLEKSVSPDMLPGKKKNDQ  
LIATQGYRRKQSNLSTIQSAAEEGRLQMKFEENSKKNHNDIEFDSISHSLNYTVGKPLEIFLDGPY  
GAPSSHIFQAQHAVLIATGIGVTPFASILQSIMHRYWKARHTCPKCKFSWASEIPTVMHLRKVDF  
WINRDQQSFEWFVNLLSQLEMEQAELGDAMERFLEMHMYITSALQKSDMKAVTLQLAMDVHQ  
MEKRDITGLKTRTNAGRPNWDKVFKHLQDQKKGKVTIFYCGPPQLARILRYKCDQFGFNFRKES  
F

>mouse-Mm-Duox1: GenBank™ No. XM\_130483

MGFHLALAWILLVGTLASLGAQNSISWEVQRFQDGYNNLMEHRWGSKGSRLQRLVPASYADGVY  
QPLKEPYLPNPRHLSNRVMRGSAGQPSLRNRTVLGVFFGYHVLSDLVSVETPGCPAEFLNIYIPHG  
DPVFDPKRGNVLPFQRSRWRDNTGQSPSNPRDQSNQVTGWLDGSAIYGSSHSWSDTLRSFSGG  
QLASGPDPAFSDSQSSLLMWMAPDPSTGQGGPRGVYAFGAQRGNREPFLQALGLLWFRYHNLCA  
RKLAQEHPHWGDEELFQHARKRVIATYQNIAMYEWLPSFLKQTPPEYPGYRPFDPSPISPEFVVAS  
EQFLSTMVPSGVYMRNASCHFQGIPSHNSSVSGALRVCNSYWSREHPKLQRAEDVDALLGMSAQ  
IAEREDHVVEDMQDFWPGLKFSRTDYASCLQRGRDLGLPSYTKAREALGLSPISHWQDINPAL  
SRSNGTVLEATAALYNQDLSRLELLPGGLLESHGDPGPFSTIVLDQFVRLRDGDYWFENTRNL  
FSKEEIAEIRNTSLRDILVAVTNVDPSALQPNVFFWLAGDPCPQPSQLSAKGLPACAPL FIRDYFEGS  
GFGFLTIGTLCCFPLVSLLSAWIVARLRKRNFKRLQRQDRQSIMSEKLVGGVEALEWQGRNEPCR  
PVLVHLQPGQIRVVDGRLTVLRTIQLRPPQVNLILSSNRGRRTLLLKIPKEYDLVLLFNMEEERQA  
LVENVRGALKENGLSFQEWELREQELMRAAVTRQQRGHLLLETFFRHLSQVLDINQADAGTLPLD  
SSTKVREALTCELSRAEFADSLGLKPQDMFVESMFLADKDGNGYLSFREFLDILVVFMKGSPEEK  
SRLMFRMYDFDGNGLISKDEFIRMLRSFIEISNNCLSKAQLAEVVESMFRESGFQDKEELTWEDFH  
FMLRDHSDLRFTQLCVKGVEVPEVIKNLRRASYISQEKICSPRMSAHCARNNMKTASSPQRLQ  
CPMDTDPPEIRRRFGKVTSFQPLLFTeahREKFQRSRRHQTVQQFKRFIENYRRHIGCVAVFYTI  
TGALFLERAYYYAFAAHHSGITDTTRVGIILSRGTAASISFMFSYILLTMCRNLITFLRETFLNRYIPFD  
AAVDFHRLIASTAILTVLHSAGHVNVYLSISPLSVLSCLFPGLFHDDGSEFPQKYYWFFQTVP  
GLTGVL LLLALAIMYVFASHHFRRRSFRGFWLTHHLYIFLYILLIIGSFALIQMPRFHIFFLVPAIYV  
GDKLVLSRKKVEISVVKAEALLPSGVTHLRFQRPQGFEYKSGQWVRIACLALGTTEYHPFTLSAP  
HEDTSLHIRAAGPWTRRLREIYSPPTGDTCARYPKLYLDGPFGEHGEWHKFEVSVLVGGGIGVT  
PFASILKDLVFKSSVSCQVFCCKIYFIWVTRTRQRFEWLADIIREVEENDRQDLVSVHIYITQLAEKF

DLRTTMLYICERHFQKVLNRSFLTGLRSITHFGRPPFEFFNSLQEVHPQVRKIGVFSCGPPGMTK  
NVEKACQLINRQDRTHFSHHYENF

>mouse-Mm-Duox2: GenBank™ No. XM\_917937

MLPTSPKTLVLLGALLTGPLGPAGGQDAPSLPWEVQRYDGFNFKYHQGAAGSRLRRLIPANY  
ADGVYQALEEPLLPNPRRLSDAVAKGKAGLPSVHNRTVLGVFFGYHVLSDLVSVETPGCPAEFLNI  
YIPRGDPVFDPKRGNVLPFQRSRWDRNTGQSPSNPRDQSNQVTGWLDGSAIYGSSHSWSDTLR  
SFSGGQLASGPDPAFPRNSQSLLMWMAPDPSTGQGGPQGVYAFGAQRGNREPFLQALGLLWFRY  
HNLCARKLAQEHPHWGDEELFQHARKRVIATYQNIALLYQWLPFLQKTPPEYSGYRPFMDPSISPE  
FVVASEQFLSTMVPPGVYMRNSSCHFRKFPKEGSDSSPALRVCNSYWIRESPLKTAQDVDQLLGG  
MASQISELEDRIEDLRDYWPGPERFSRTDYVASSIQRGRDMGLPSYSQALLALGLEPPKNWSAL  
NPQVEPQVLEATAALYNQDLSQLELLLGGLLESHGDPGLFSNILDQFVRLRDGDYWFENTRNG  
LFSKEEIAEIRNTTLRDVLVAVSNVDPSALQPNVFFWQEGAPCPQPRQLTDDGLPQCAPVTVIDYFE  
GSGAGYGVTLVAVCCFPLVSLIVAGVVAHFRNRERKMLLKKGKESLKKQPASDGVPAWEPGPK  
KSYVPTLQLLPDRSLQVLDKRFVLRITLQSPQVNLILSSNSGRRITLLKIPKEYDLVLMFNSEE  
DRGAFVRLQLDLCICCTPGLHIAEVDEKELLRKAVTKQQRAGILEIFFRQLFAQVLDINQADAGTLP  
LDSSQVREALTCELSRAEFADSLGLKPQDMFVESMFLADKDGNGYISFREFLDILVFMKGSSE  
DKSRLMFTMYDLGNGFLSKDEFFTMMRSFIEISNNCLSKAQLAEVVESMFRESGFQDKEELTWE  
DFHFMLRDHSDLRFTQLCVKGGAGGTKDIFKQSSACRVSFINRTPGNRVMGSPRPLYTEALQEK  
KQSGFLAQKFKYKRFVENYRRHIVCVTIFSAICIGLFADRAYYYGFASPPTDIEETTYVGIILSRGTA  
ASISFMFSYILLTMCNRLITFLRETFLNRYIPFDAAVDFHRWIAMAAVVLAVLHSAGHAVNVYIFSVS  
PLSLMACVFPNVFVNDGSKFPPKYWWFFETVPGMTGVLLLLVLAIMYVFASHHFRHRSFRGFWL  
THHLYVVLVLIHGSYALIQLPSFHIIYFLVPAIYGGDKLVLSRKKVEISVVKAEELLPSGVTYLQFQ  
RPKTFEYKSGQWVRIACDLGTNEYHPFTLTSAPHEDTSLHIRAVGPWTTLREIYSPVGGTCAR  
YPKLYLDGPFGEHGEWHKFEVSVLVGGGIGVTFASILKDLVFKSSMGSQMLCKKIYFIWVTRTQ  
RQFEWLADIIEVEENDRQDLVSVHIYITQLAEKFDLRTTMLYICERHFQKALNRSFLTGLRSITHF  
GRPPFELFFNSLQEVHPQVRKIGVFSCGPPGMTKNVEKACQLINRQDRAHFVHHYENF

>human-Hs-Duox1: GenBank™ No. NM\_017434

MGFCLALAWTLLVGAWTPLGAQNPISWEVQRFDFGWYNNLMEHRWGSKGSRLQRLVPASYADGVY  
QPLGEPHLPNPRDLSNTISRGPAGLASLRNRTVLGVFFGYHVLSDLVSVETPGCPAEFLNIRIPGD  
PMFDPDQRGDVLPFQRSRWDPETGRSPSNPRDPANQVTGWLDGSAIYGSSHSWSDALRSFRGQ  
LASGPDPAFPRDSQNPLMWAAPDPATGQNGPRGLYAFGAERGNREPFLQALGLLWFRYHNLWAQ  
RLARQHPDWEDEELFQHARKRVIATYQNIAYEWLPSFLQKTLPEYTYRPFDPSPISSEFVAASEQ  
FLSTMVPPGVYMRNASCHFQGVINRNSSVSRALRVCNSYWSREHPSLQSAEDVDALLGMASQIA  
EREDHVLVEDVRDFWPGPLKFSRTDHLASCLQRGRDLGLPSYTKARAALGLSPITRWQDINPALSR  
SNDTVLEATAALYNQDLSWLELLPGGLLESHRDPGLFSTIVLEQFVRLRDGDYWFENTRNLGFS  
KKEIEEIRNTTLQDVLVAVINIDPSALQPNVFWVHKGDPCPQPRQLSTEGLPACAPSVVRDYFEGSG

FGFGVTIGTLCCFPLVSLLSAWIVARLRMRNFKRLQGQDRQSIVSEKLVGGMEALEWQGHKEPCRP  
VLVYLQPGQIRVVDGRLTVLRTIQLQPPQKVNFLVSSNRGRRTLLLKIPKEYDLVLLFNLEERQAL  
VENLRGALKESGLSIQEWELREQELMRAAVTREQRHLLLETFFRHLSQVLDINQADAGTLPDSS  
QKVREALTCELSRAEFAESLGLKPQDMFVESMFSLADKDGNGYLSFREFLDILVVFMMKGSPEEKSR  
LMFRMYDFDGNLISKDEFIRMLRSFIEISNNCLSKAQLAEVVESMFRESGFQDKEELTWEDFHF  
MLRDHNSLRFQCVKGVPEVIKDLRASYISQDMICSPRVSARCSRSDIETELTPQRLQCP  
MDTDPPEIRRRFGKVTSTFQPLLFTAHREKQFQRSCLHQTQQFKRFIENYRRHIGCVAVFYAAG  
GLFLERAYYYAFAAHTGTDTRVGIILSRGTAASISFMFSYILLTMCNRLITFLRETFLNRYVPFDA  
AVDFHRLIASTAIPVAVLHSHVGHVNVYLFSSPLSVLSCLFPGLFHDDGSELPQKYWWFFQTVPG  
LTGVVLLLILAIMYVFASHHFRRRSFRGFWLTHHLYILLYVLLIHHGSFALIQLPFHIFLVPAAIYGG  
DKLVSLSRKKVEISVVKAEELLPSGVTHLRFQRPQGFYKSGQWVRIACLALGTTEYHPFTLTSAPHE  
DTLSLHIRAAGPWTRLREIYSAPTGDRCARYPKLYLDGPFEGHGEWHKFEVSVLVGGGIGVTFP  
ASILKDLVFKSSVSCQVFCCKIYFIWVTRTQRQFEWLADIIREVEENDHQDLVSVHIYITQLAEKFDL  
RTTMLYICERHFQKVLNRSFTGLRSITHFGRPPFEPFFNSLQEVHPQVRKIGVFSGPPGMTKNV  
EKACQLINRQDRTHFSHHYENF

>human-Hs-Duox2: GenBank™ No. NM\_014080

MLRARPEALMLLGALLTGSLGPSGNQDALSLPWEVQRYDGWFNNLRHHERGAVGCRLQRRVPAN  
YADGVYQALEEPQLPNRRLSNAATRGIAGLPSLHNRTVLGVFFGYHVLSDVVSVEETPGCPAEFLNI  
RIPPGDPVFDPDQRGDVVLPFQRSRWDPETGRSPSNPRDLANQVTGWLDGSAIYGSSHSWSDALR  
SFSGGQLASGPDPAFPRDSQNPLLMWAAPDPATGQNGPRGLYAFGAERGNREPFLQALGLLWFRY  
HNLWAQRLARQHPDWEDEELFQHARKRVIATYQNIAYVEWLPSFLQKTLPEYTYRPFDPSPISPE  
FVVASEQFFSTMVPPGVYMRNASCHFRKVLNKGFGSSQALRVCNNYWIENPNLNSTQEVNELLL  
GMASQISELEDNIVVEDLRDYWPGPGKFSRTDYVASSIQRGRDMGLPSYSQALLAFGLDIPRNWSD  
LNPVNDPQVLEATAALYNQDLSQLELLLGGLESHPGPFSAIVLDQFVRLRDGDYWFENTR  
NGLFSKKEIEDIRNTTLRDVLVAVINIDPSALQPNVFWHKGAPCPQPKQLTTDGLPQCAPLTVLDF  
FEGSSPGFAITHALCCLPLVSLLLSGVVAYFRGREHKKLQKKLKESVKKEAAKDGVPAMEWPGPKE  
RSSPIIIQLLSDRCLQVLNRHLLTVLRVVLQPLQVNLILSNRGCRTLLLKIPKEYDLVLLFSSEEE  
RGAFVQQLWDFCVRWALGLHVAEMSEKELFRKAVTKQQRERILEIFFRHLFAQVLDINQADAGTLP  
LDSSQKVREALTCELSRAEFAESLGLKPQDMFVESMFSLADKDGNGYLSFREFLDILVVFMMKGSPE  
DKSRLMFTMYDLDENGFLSKDEFFTMRSFIEISNNCLSKAQLAEVVESMFRESGFQDKEELTWE  
DFHFMLRDHSELRFQCVKGGGGGGNGIRDIFKQNISCRVSFITRTPGERSHPQGLGPPAPEAP  
ELGGPGLKKRFGKKAAPTPLYTEALQEKMQRGFLAQKLQYKRFVENYRRHIVCVAIFSAICVG  
VFADRAYYYGFASPPSDIAQTTLVGIILSRGTAASVFMFSYILLTMCNRLITFLRETFLNRYVPFDAA  
VDFHRWIAMA AVVLAILHSAGHAVNVYIFSVSPLSLACIFPNVFNVDGSKLPQKFYWWFFQTVPG  
MTGVVLLLVLAIMYVFASHHFRRRSFRGFWLTHHLYILLYALLIHHGSYALIQLPTFHIFLVPAAIYGG  
DKLVSLSRKKVEISVVKAEELLPSGVTYLQFQRPQGFYKSGQWVRIACLALGTTEYHPFTLTSAPHE

DTLSLHIRAVGPWTTTRLREIYSSPKGNGCAGYPKLYLDGPFGEHGEWHKFEVSVLVGGGIGVTPF  
ASILKDLVFKSSLSQMLCKKIYFIWVTRTQRQFEWLADIIQEVEENDHQDLVSVHIYVTLAEKFD  
LRTTMLYICERHFQKVLNRSFLTGLRSITHFGRPPFEPFFNSLQEVHPQVRKIGVFSCGPPGMTKN  
VEKACQLVNRQDRAHFMHHYENF

>chicken-Gg-Duox : GenBank™ No. XM\_425053

EVQRYDGWYNNLQHRSRGSVGSRLRLLPANYADGVYQALQEPHVPNARQLSNAVARGPSGLPSK  
RNTTVLAVFFGFHVLSDILGTEKPGCPAEFLNIHIPEGDPVFDPA GTGDIVLPFQRIRWALETGQSPN  
SPREQTNEVTGWLDGSSYIGPSHSWSDALRNFSNGQLASGPGGHVPRETDGKVP MWKALDPSTG  
QGGLRGIYDLGNAWGNENRFLQAMSIAWFRYHNYLAAELAKDHPSWSEDEFQHARKRVIATFQS  
IVLYEWLPALLGTPVQKYTGYYQHMDPSISPEFVAAARIFLATTVP PGVYKRDPRCHVRNVSSSGG  
FPAMRLCNSYWSRESIEMQQEDVDDLLGMSSQIAEREDSIVVEDLQDYWYGPLKYSRADYVASW  
LQRGRDLGLPTYNQARERFGLQDWTNLAPHSQQKQVLEVAALYANNTARLELLPGGMLEGDSP  
LFSAILDQFVRLRDGDRFWFENTKNGLFTAKEAEIRNTTFRDILA AVTYSQPAELQSNVFWWSKG  
DPCPQPQQLTAQLLANCTPMTVLDYFEGSGAGFGHIIIIVLCCLPLGLPLQFVIHLLFYQRKHRK GAL  
WYLMPLSPMCSQYMFMLCYFPSAMEWHGPKTDSSLVYIQFQADKVLKVL DGRGLMLRSVSLNA  
QQSVEVILSSNKGKALLKSPKEYDLVLFSEEAERSFFRKLQDY LKTSCELELVSEMKEQSLL  
KRAVTQEQRKQILETFFRHLFARMLDIDKTDAGELNFESSQKARESLTCELSRAEFAEALGLKVNS  
MFVDSMFLADKDGNGYISFREFLDILVFMKGSSEEKSKLMFRMYDIDENGFLSKEEFLRMLRY  
FSSAQQTFSQRLQLQVSAQAACFSSSVPKEATWKPMGSTLTTRSPFLLANQYQLHLYTEAQRKKY  
QQNKVKQKIQEFKRFIENYRRHIVCVVLFSAITAGLFVERAYYYAFASPSTGIAQTTFVGIISRGSA A  
CISFMYSYILLTMCRNLTIVLRETFLNRYIPFDAAVDFHRWIAMAALIFSVLHTAGHLNVVYIFSVTP  
LSVLSCLFSSVFMNDGPDPPILPFTGMTGVLLLIILAVMYVFATHHFRRVSFQAFWITHHLYVLLYV  
LVIIHGSYALIQQPRFHIYFIIPALIYGADKLLSLSRKKVEISVVKAE LPSGVTHLRFQRPQDFDYKS  
GQWVRIACMALGTTEYHPFTLTSAPHEDTSLHIRAVGPWTTTRLRELYSPESLALIGKLPKLYLDGP  
FGEHGEWHKFEVSVLVGGGIGVTPFASILKDLVFKSSINSKLMCKKIYFIWVTRTQRQFEWLADII  
REVEETDRNELSVHIYITQLAEKFDLRTTMLYICERHFQKVLNKS LFTGLRSITHFGRPPFIPFFDS  
LQEVHPEVHKIGVFSCGPPGMTKSVEKACQQLNKKDQAYFAHQ

>dog-Cf-Duox1: GenBank™ No. NM\_001003122

MGFCLALTWTFLVGSWTSMGAQKPISEVQRFQDGWYNNLMEHKWGSKGSRLQRLVPASYADGVY  
QPLGEPHLPNPRDLSNAAMRGPAGQASLRNRTVLGVFFGYHVLSDLVSVETPGCPAEFLNIRIPPG  
DPVFDPNRGRGDVVLPFQRSRWDPESGQSPSNPRDLTNAV TGWLDGSAIYGSSHSWSDALRSFSGG  
QLASGPDPAFPRNAQPPLMWSAPDPASGQRGPGGLYAFGAERGNRDPFLQALGLLWFRYHNLC A  
QRLARQHPHWGDEELFQHARKRVIATYQNIALYEWLPSFLQQAPVKYAGYNPFLDPSISPEFLVASE  
QFFSTMVPPGIYMRNASCHFQEVINRNSISRALRVCNSYWSRKHPNLRR AEDVDALLGMASQIA  
EREDHVVEDVLDVFWPGSLKFSRTDHVAGCLQRGRDLGLPSYTKARAALGLPPITRWQDINPALSQ  
NNHTVLEATAALYNQDLSQLELLPGGLLESHGDPGLFSAIVLNQFVRLRDGDRYWFENTRNLG F

SEEEIAEIRNTSLRDVLVAVTNMNPSTLQPNVFFWHMGDPCPQPRQLSTQGLPACAPSTMQDYFEG  
SGFGFGVTIGTLCCFPLVSLLSAWIVARLRKKNFKKLQGGDRKSVMSEKLVGGMEALEWQGHKEP  
CRPVLVHLQPGQICVVDGRLSVLRTIQLRPPQQVNLILSGNRGRRALLLKIPKEYDLVLLFNLEER  
QVLVENLRGALKESGLKFQEWELREQELMRTAVTRQQRSHLLETFFRHLSQVLDIDQADAGTLP  
LDSSQKVQEALTCELSRAEFAESLGLKPQDMFVESMFSLADKDGNGYLSFREFLDILVVMKGSPE  
EKSRLMFRMYDFDGNLISKDEFIRMLRSFIEISNNCLSKAQLTEVVESMFRESGFQDKEELTWED  
FHFMLRDHDSELRFQQLCVRGVEVPEVIKDLRRASYISQEKICPSPRVSARCPHSNTEVEWTPQR  
LQCPVDTPPQEQIRRRFGKVTSTFQPLLFTEAQREKFQRRSRHQTLQQFKRFIENYRRHIGCVAVFY  
AITGGLFLERAYYAFGAHHMGITDTTRVGILSRGTAASISFMFSYILLTMCRNLTFLRETFLNRYV  
PFDAAVDFHRLIASTAVLTGRALDAGHVNVVYLSISPLSVLSCLFPGLFHNDGSEFPQKYWWFF  
QTVPGTGVMLLLVLAIMYVFASHHFRRHSSFRGFWLTHHLYILLYVLLIIGSFGLIQLPRFHIFLV  
PALIYVGDKLVSLSRKKVEISVVKAEELLPSGVTHLQFQRPQGFYKSGQWVQIACLALGTTEYHPFT  
LTSAPHEDTSLHIRAAGPWTRRLREIYSPPTGDGCAKYPKLYLDGPFGEHGHQEWKFEVSVLVGG  
GIGVTPFASILKDLVFKSSVSCQVFCCKIYFIWVTRTRQRFQEWLADIIREVEENDCQDLVSVHIYITQ  
LAEKFDLRTTMLYICERHFQKVLNRSFLTGLRSITHFGRPPFEPFFKSLQEVHPQVRKIGVFSCGPP  
GMTKNVEKACQLINRQDRTHFSHHYENF

>dog-Cf-Duox2: GenBank™ No. XM\_535461

AFGAERGNRDPFQALGLLWFRYHNLCAQRLRQHPHWGDEELFQHARRVIATYQNIALYEWLPSFL  
QKTLPKYTYGHPFLDPSISPEFLVASEQFFSTMVPPGVYMRNASCHFQMVLTKDLGSSPALRVCNS  
YWLRENANLNSAQAVDQLLGMASQISELEDRIVVEDLRDYWPGSGKFSRTDYVASSIQRGRDMG  
LPSYTQALMALGLEIPRNWSHINPNVDAQVLEATAALYNQDLTRLELLPGGLLESHGDPGSLFSAI  
LDQFVRLRDGDYWFENTRNLFSKEEIAEIKNTTFWDVLVAVTNVNHSALQPNVFIWHDGAPCP  
QPRQLTTQGLPQCVPLTVFDYFEGSGPGFGITIVALCCLPLVSLISGVVAHFRGRERKRLQKKGKE  
SVKKEAAKDGVPAWEWPGPREKSYPITIQLLPDRRLQVLDKLSVLRVTVQLQPPQQVNLILSSNRG  
CHTLLLKIPKEYDLVLLFNSEEEERGTFVQHLQDFCVQWSLGLDVAEMRENELFRAVTKQQRGRIL  
EIFFRYLFAQVLDIDQADAGTLPNSSQKVREALTCELSRAEFAESLGLKPQDMFVESMFSLADKD  
GNGYLSFREFLDILVVMKGSPEDKSRLMFTMYDLANGFLSKDEFFTMMSFIEISNNCLSKAQL  
TEVVESMFRESGFQDKEELTWEDFHFMLRDHDSELRRFQQLCVRGVDIFKPNISCRVSFITRTPGK  
RSCSQDLEFSASEAPELGGPGLKKRFGKVVGPTPRLYTEALKEKMQRGLLAQKLRQYKRFVENY  
RRHIVCVVVFSAICAGLFAERAYYAFASPPSGIAETTFVGILSRGTAASISFMFSYILLTMCRNLTIF  
LRETFLNRYVPFDAAVDFHRWIAMAAVVLAILHSAGHAVNVFIFSVSPLSLLACIFPNIFMNDGSQL  
PQKFYWWFFQTVPGMTGVLLLLVLAIMYVFASHHFRRRSFRGFWLTHHLYIVLYVLLIIGSFGLIQ  
LPRFYIYFLVPALIYVGDKLVSLSRKKVEISVVKAEELLPSGVTHLQFQRPQGFYKSGQWVRIACLAL  
GTNEYHPFTLTSAPHEDTSLHIRAVGPWTRRLRETYSLPKGDGCARYPKLYLDGPFGEHGHQEW  
KFEVSVLVGGGIGVTPFASILKDLVFKSSLSQMLCKKIYFIWVTRTRQRFQEWLADIIREVEENDHQ  
DLVSVHIYITQLAEKFDLRTTMLYICERHFQKVLNRSFLTGLRSITHFGRPPFEPFFKSLQEVHPQV

PKIGVFSCGPRNDQECREGLSAHQAGPGLR

>rat-Rn-Duox1: GenBank™ No. NM\_153739

MAVYSAVAWILLFGMLASLGAQNSVSWEVQRFDDGWYNNLMEHRWGSKGSRLQRLVPASYADGVY  
QPLREPYLPNPRHLSNRVMRGPAGQPSLRNRTVLGVFFGYHVLSDLVSVETPGCPAEFLNIYIPRGD  
PVFDPDKRGNVVLFPQRSRWDRSTGQSPSNPRDLVTGWLDGSAIYGSSHSWSDXLRSSXXGGQLAS  
GPDPAFPRNSQNSLLMWMAPDPATGQGPQGLYAFGAQRGNRXXFLQALGLLWFRYHNLCAKRLA  
QEHPHWGDEELFQHARKRVIATYQNIAMYEWLPSFLKQTPPEYPGYHPFLDPSISPEFVVASEQFL  
STMVPPGVYMRNASCHFQGIANRNSVSGALRVCNSYWSRENPKLQRAEDVDALLGMSQIAER  
EDHLVVEDVQDFWPGPLKFSRTDYLASCLQRGRDLGLPSYTKAREALGLPPVSHWQDINPALSRS  
NGTVLEATAALYNQDLSRLELLAGGLESHEGDPGLFSAIVLDQFVRLRDGDYWFENNRNGLFS  
KEEIAEIRNTSLRDILVAVTNVDPSALQPSVFFWLAGDPCPQPSQLSTQGLPACAPLFVRDYFKGSGF  
GFGLTIGTLCCFPLVSLLSAWIVARLRMRNFKRLQRQDRQSIMCEKLVGGVEALEWQGRKEPCRPV  
LVHLQPGQIRVVDGRLTVLRTIQLRPPQVNLILSSNRGRRTLLKIPKEYDLVLLFNMEEERQALV  
ENIRAALKENGLSFQEWELREQELMRAAVTRQQRGHLETTFFRHLFSQVLDINQADAGTLPLDSST  
KVREALTCELSRAEFADSLGLKPQDMFVESMFLADKDGNGYLSFREFLDILVVFMMKGSPEEKSRL  
MFRMYDFDGNGLISKDEFIRMLRSFIEISNNCLSKDQLAEVVESMFWESGFQDKEELTWEDFHFM  
LRDHSDLRFTQLCVKGVEVPEVIKNLCRRASYISQEKICPSPRMSAHCARNNTKTASSPQRLQCP  
VDTDPQEIERRRFQKVTSTFQPLLFTEAHREKFQRSRRHQTVQQFKRFIENYRRRHIGCVAVFYTITG  
ALFLERAYYYAFAAHHSGITDTTRVGIILSRGTAASISFMFSYILLTMCRNLTFLRETFLNRYIPFDAA  
VDFHRFIASTAAILTVLHSHAGHVNVVYLSISPLSVLSCLFPDLFHDDGSEFPQKYYWVFFQTVVPL  
TGVLLLLALAIMYVFASHHFRRRSFRGFWLTHHLYIFLYILLIIGSFALIQMPRFHIFFLVPAIYVGD  
KLVSLSRKKVEISVKAELLPSGVTHLRFQRPQGFQYKSGQWVRIACLALGTTEYHPFTLTSAPHED  
TSLHIRAAGPWTTTLREIYSPPTGDTTCARYPKLYLDGPFGEHQEWKFEVSVLVGAGIGVTPFAS  
ILKDLVFKSSVSCQVFCCKIYFIWVTRTQRQFEWLADIIEVEENDSRDLVSVHIYITQLAEKFDLRT  
TMLYICERHFQKVLNRSFLTGLRSVTHFGRPPFEPFFNSLQEVHPQVRKIGVFSCGPPGMTKNVEK  
ACQLINKQDRTHFSHHYENF

>rat-Rn-Duox2: GenBank™ No. NM\_024141

MLPTSLKTLVLLGALLTGPLGPAGGQDAPSLPWEVQRYDGFNNLKYHQGAAGSQLRRLVPANY  
ADGVYQALQEPLLPNARLLSDAVSKGKAGLPSAHNRTVLGLFFGYHVLSDLVSVETPGCPAEFLNI  
YIPRGDPVFDPKRGNVVLFPQRSRWDRSTGQSPSNPRDLTNQVTGWLDGSAIYGSSHSWSDTLRS  
FSGGQLASGPDPAFPRNSQNSLLMWMAPDPATGQGGPQGLYAFGAQRGNREPFLQALGLLWFRYH  
NLCAKRLAQEHPHWGDEELFQHARKRVIATYQNIALYQWLPSFLKQTPPEYSGYRPFMDPSISPEF  
VAASEQFLSTMVPPGVYMRNSSCHFREFPKESSSSPALRVCNNYWIENPSLKTAQDVDQLLLG  
MASQISELEDRIVEDLRYWPGPDRYSRTDYVASSIQSGRDMGLPSYSQALQALGLEPPKNWSAL  
NPKVDPQVLEATAALYNQDLSRLELFLGLESHEGDPGLFSNIILDQFVRLRDGDYWFENTRNG  
LFSKEEIAEIRNTTLRDVLVAVSNVDPSALQPNVFFWQEGAPCPQPQQLTTEGLPQCVPTVIDYFE



GSGAGYGVTLAVCCFPVVSIIAWVVARFRNRERKMLLKKGKESLKKQTASDGVPAWEWPGPKE  
SSYPVTVQLLPDRSLKVLDKRLTVLRTIQLQPTQQVNLILSSSHGRRTLLLKIPKEYDLVLMFNSEE  
DRDAFVQLLQDLCVCSTPGLRIAEMDEKELLRKAVTKQQRAGILEIFFRQLFAQVLDINQADAGTLP  
LDSSQQVREALTCELSRAEFADSLGLKPQDMFVESMFSLADKDGNGYISFREFLDILVVFMMKGGSPQ  
DKSRLMFTMYDLGNGFLSKEEFFTMMSFIEISNNCLSKDQLAEVVESMFRESGFQDKEELTWE  
DFHFMLRDHSDLRFTQLCVKGGAGGTGDIFKQSNACRVSFLLTRTPGNRVMAPSPRLYTEALQEK  
MQRGFLAQKQKQFKRFVENYRRHIVCVTIFSAICAGLFADRYYYYGFASPPTDIEETTYVGILSRGT  
AASISFMFSYILLTMCRNLTFLRETFLNRYIPFDAAVDFHRWIAMA AVVLAVVHSLGHAVNVYIFS  
SPLSLMTCVFPVSVVNDGSKLPPKYYWFFETVPGMTGVLLLLVLAIMYVFASHHFRRHSSFRGF  
LTHHLYVVLYALIIHGSYALIQLPSFHIFLVPPIIYVGDKLVSLSRKKVEISVVKAEELLPSGVTYLQF  
QRPKTFEYKSGQWVRIACLSLGTNEYHPFTLTSAPHEDTSLHIRAVGPWTTRLREIYSPPVGGTSA  
RYPKLYLDGPFGEHGEWHKFEVSVLVGGGIGVTPFASILKDLVFKSSMGAQMLCKKIYFIWVTRT  
QRQFEWLADIIREVEENDSRDLVSVHIYITQLAEKFDLRTTMLYICERHFQKVLNRSFLTGLRSVTH  
FGRPPFELFDSLQEVHPQVHKIGVVFSCGPPGMTKNVEKACQLINRQDRAHFVHHYENF

>frog-Xt-Duox1: Ensembl No. ENSXETP00000051515

NDINWEVQRYDGWYNNLAYHSTGSPGSKLLRHIPAFYTDGVYQVPKEPELPNPRISISNVVTKGKSG  
LPSSRNLTVMASIFGYHVLSEVVYTGKPACPAEFLNIEIPKGDVDFDRNTSKVVIPFQRSKWYPDT  
GRSPNNPRDHVNSVSAWIDGSSYIYSSHSWCDALRNFSGGKLASGPDEGVPRFAKSDLLMWKVPN  
PSTGETGNNGLYAFGNARANESPFLQSLGILWFRYHNYKAQEFAKENPEWSDEVLFQHARKWVIA  
VYQNIYFYEWLPAFLSRNVTAYKGYQQHVDPSISPVFTVLLSQMIYTMMPSGIYMRNKDCNFQNV  
GSNGRLWPALRLCNYWNRENSNLKNSSTDEILMGMASQIAEKEDNILVNDLTDYCYGQIKYSR  
TDLFAASILHARDLGLPNYNKVCEYYQCPLLENWEKMTDKELGKKLASLYGNDTEKLEFIPGLLA  
EMAGNSINFFSDIVLEQFYRLRDGDRFWFENVKNGLFSSKKDIDNIRNIKLQNVLVAVTDAGDTIQQ  
NVFFLKEDDPCPQPKQLQSEEELEECVPFTVTDYFEGCAAGFGITIVALCCLPLVSFLIWLVAKSQK  
RTFRAFQKKITTANKNSMCGSEASEWCGYKEPSQDVIIQLHPNQILKVLDSKKKPRVVNLHKHP  
NVKVLNSDGSRTVLIKIPKEYDLVLQFNNQRDRDVFIEQLKESLAGSTISPTFSLKETFVLLKES  
FTKKQRQQMLETFIRHSLSHVIDINKEHAGTTQGGNFRDVLQCELSREEFADSLGLNPNAQFVES  
MFSMADKDHNGYLSFEEFCFILCSLIKSAEDKLFKIFSMHDVNGNGILPKEEFSRMLRSFRNVSS  
FLSNEKTENVIESMFNEAGISNKKELAWEDFYGLFKDHKNILNQTNLYFDGIHVINQSYVLCIICSI  
DSNIYTNISSALCFILFICFIALLIKKHLCHPNRNTSQIQLPNIYTVARREKYETSTFRQKIQQFKRLV  
ENYRRHIVCLIIIFYGISAGLFAERAYYYGFASPPSGIADATFIGLIISRGSAASISFMFSYMLLTMCRNL  
ITLLRETFLNQYIPFDSA VDFHRLIAVTALVLSILHSLGHVNVYIFTIPLSVLSCLFPVTVFVDDGSDH  
PNKYYWFFETVPGMTGVLLLLAVMALMYVFCYHFRRVSFRCFWLTHHLYVVFYILTIIHGSFALI  
QQPRFHIFIVPALIYSADKLISLSRKKIQINVLDIQRLPSDVIHLEFQRPNDFDYKSGQWVRIACLDL  
GTDEYHPFTLTSAPHEDTSLHIRAVGPWTTKLRELYSSKVENIPYPKLYLDGPFGEHGEWHKFE  
VSVLVGGGIGVTPFASILKDLVFKSSVNSRIHCKKVYFIWVTRTQHQFEWLTDIIREVEKNDKQEL

LSVHIYITQLAEKFDRTTMLYICEQHFQKVKNQSLMTGLRSVTHFGRPPFAGFFSSLQDVHPKVK  
KIGVFSCGPPGMTKNVENACRKLNRDESYFVHHYENF

>frog-Xt-Duox2: Ensembl No. ENSXETP00000056553

KNYCLEMLYRYAVIPFRNPFNSQKNIHWEIQRYDGWYNNLHQHNRGSAGFRLLRLVPAAYSDGVY  
QAIQEPPELPNPRQISNVAMKGDGSLSSNRNRTVLGVFFGYHVLSEIISTENSGCPAEFLNIAVPGD  
KIFDPDATGQVMLPFQRSQWWKCSGESPNNPRHQINSVTAWIDGSSYIYSSHSWSDALRSFSGGKL  
ASDSDPMFPKEAGDALLMWRAPDPSTGHRGKEGIYGFGNARANENPFLQAVSILWFRYHNYLAQQ  
FAKKYPQWSEDEDLFHNTRKWIATYQNVVMYEWLPVFLQKEVSAYEGYNQHVDASLSHEFQAAV  
QFMATLLPAGIYTRNKTCHFHNVQSSDGGFWPAYRLCDSYWKRNPNIKTAQDIDNLLLGMISQIA  
EKEDNVVVEDLRDYWYGTLKYTRMDYISWSIQQRDFGLCSYNHARQHFGLSPIANWSEINRSLY  
QRNKELFEDLANLYGNDTEKLELFPGVMLESDGDPGELLTAIIMDQFQRLRDGDRFWFENSKNGL  
FTLEEIERIKKTTFHHDVILSVTSADLGDFQPDVFKWVNGDPCPQPEQISAQMLANCTPPTVTDYFAD  
SVTGYSILIAVICSFPLAQKVSFFIAWMVAQSRRRNFKRFQKRRAIQSIRQSLPAEGISAQEWQGPKE  
PTCNVLLQIDPQHVIKVLDSRCAIRRTISLQSQKNVIVIQSNHSGSKTLLIRIPKEYDLVLLFHSEEEC  
REFINQLQENGIELHQYNKKEKHLLKEAVTKKQRSHILETFFRQSFAQVLHITQSDNMGSSDKVKE  
ALKCELSRTEFAESLGLKQPQSMFVESMFLADEDGNGYLSFREFLNILVIFMTGTPKEKSELFMFKM  
YDVDGNGFLSKEEFFTMLKSFEISNNCISKDQTEQVIEIMFRDSGFQNKELTLEDHFYLLRDHD  
KELRFSQICIAGMDAPEVFNQMCRRVSFVDTTNMCQSPNPSLTGRIRKKVRNNTFLMHINFFRTN  
FPHLFDLEKQTRKLINKPKTSSEARLYTEAKKEKYPKGIHQKLQEFKRFAENYRRHIVCVVIFYGIS  
VGLFLERAYHYAFESQHRGISEVTMPGIIISRGTAASISFMFSYILLTMCRNLTFLRETFLNQYIPFD  
AAVDFHRLVAKTAILTEFKLLFSHQTDIKLMIVFTLRLCMSCYFLQATYSNDNVLSLNLHPECLPLL  
TGLTGVLALLAVLALMYVFSSHHFRRISFRGFVWVTHHFYILLYILTLHGSFGLLQQPKFHVFLMAPA  
LIFIRDSLISLRRKKTEINVMKADLLPSDVTCLRFQRPADFDYKSGQWVRIACLALGTNEYHPFTLTT  
APHEDILSLHIRAAGPWTTTLRELYSPQVAELGGYPKIYLDGPFGEHGHQEWNKYEVSVLVGGGIG  
VTPFASILKDLVFKSSVNSKIACKKIYFIWVTRTQRHFEWFADIIREVEENDKCDLVSVHIYITQLAE  
KFDLRTTMLYICERHFQKVLNRSFLTGLRSITHFGRPQFEQFFISLQEVHPEVRKIGVFSCGPPGMT  
KNVEKACQMLNKENQAHFSSHFFENF

>zebrafish-Dr-Duox: GenBank™ No. AB255050

AITWEVQRYDGWYNNLADHDRGAADASLVRLYPAQYMDGVYLARQEPHLPNPRISTTAMSGQSGLLSH  
KNRSVLSVAFGYHVWSEISESRRAGCPPEFMHIK VQKDDPVFVSNSSQPVLLQFQRADWDTSTGKSPNNPRT  
QVNHVTAWIDGSSYIYSSSSWSDALREFSGGRLSSSSSRDMPRRSSNGYLMWSSPDPSSGPDGSGSEL YEFG  
NAWANENIFSVEGIIWFRYHNYLASKLHKEHPSWSDEELFQHARKRVIATFQNIAYEWLPAFLGTHVTSY  
PGYQKYVDPGISVEFEAAAVRFGTLAPPGVYKRNRNCHYRSVVND DASKSPGLRLCNTFWNRNPHLQSS  
LDVDELIMGMASQIAEREDNIIVEDLRDYMYGPLRFSRSDAVALTIQRGRDFGLPSYNQIREALS MAPVNSFE  
DINPKLKDTKLLKELADLYENDISRLELFGGLLETQEGPGPVFSTIILDQFERIRNADRFWFENKQNGLFTEE  
EIKAIRNTTFHDVLLDVTSAEKGDIIQRSVFFWVNGDPCPQPPIRASDLQPCTKAFSMSYFDDSSKVGFGVTV

VVLFVFPVVSIVASAVAQVRTARFKRFQKRSRGSTKHKEPAHGTTASEWLGHNTAPRQVTLAFSEKKVFQ  
TFDENGSPSSHSLGNQDHLXVIVSNDHQHRAALLKIPKEYDLVLFEDGVQRSEFLSLLRSELEGRIQSLTV  
MEKSEKEMLCDAVTRERQKIVETFFKHAFSKVLDIDKSDAGDLSRTREALQCELTRAEFASVLGLKSDSL  
FVESMFTLADKDGNGYLSFQEFLDVIVIFMTGTSEEKSKLLFSTHDIKGDGFLSKEEFTSLLRSFIDISGALS  
QADDGIAAMLQTAGLYNKDRFSWEDFHLLRDHSAQLNIKGMEVLGKKLGRQHVKVSFIRKNSSSSSVEEL  
THTPEEEHGQELRQRQTKKAGQSQAKLYVRPQRERFNRNPVQQCVQQFKRFIENYRRHICTVVIY AISAGL  
ALERCIYYGLQAHSSGIPETSMVDVLSRGSAA AISFLPYMLLTVCRLITMCRETFLNRYIPFDA AIDLHRQ  
MAATALILSVVHSLGHLVNVYIFCISDLSILACLFPKVFSSNNGSELPMKWTFWFFKTVPGITGVILLIFAFMY  
VFASHYFRRISFRGFWITHHLYVLIYVLTVVHGSYGLLQPRFHIYLIPPGLLFLDKLISLSRKKVEIPVLKAE  
LLSDVTMLEFKRPQGFVYRSGQWVRIACLTLGTDEYHPFTLTSAPHEETLSLHIRAAGPWTSKLRAYSPE  
KHQSSSEDSQKLYLDGPFGEHGEWTFEVSVLVGAGIGVTPFASILKDLVFKSSVKFKFHCKKVYFLWVTR  
TQRQFEWLSDIIREVEDMDMQDLVSVHIYITQLPEKFDLRTTMLYVCERHFQKVNRSFLTGLRSVTHFGR  
PFLAFLSSLQEVHPEVEKVGVFSCGPPGLTKNVEKACQQMNKRQDQTHFVHHYENF

>medaka-Ol-Duox: Ensembl No. ENSORLP0000006648

KGYCMHVTWHEIKQNIPTSATDSQSEITWEVPRFDGWYNSLGNPRRGSVGSRLVRLVPAQYWDGVYQPVL  
EPLQPNRRLSRVLAEGPSGLPSTRNQTVLFLFFGYHVAFEISDLRSSGCPPEFMNIPVPGDPVFDPNATGEV  
QLPFRGEWDQASGQSPSNPRTQINSVTAWIDGSSYGPSSWSDLLRSFSGGRLTSGSEWNMPKQGETNF  
MWSAPDPSTGEHRPQGLYELGNAWANENMFTAEGIIWFRYHNYVASKLHEEHPESDEELFQNARKTTV  
ATFQNIALYEWLPGYLGNKTLPPYPGYQQFVDPGISPEFEVAAMRISATMTPPGVYMRNRTCHFRNITNADG  
STSPAIRLCNSFWKRQVINVKTGQDVEDLLMGMASQIAEREDNIVVEDLRDYMYPGLFRTRTDLVAMTIQR  
GRDFGLQSYTEIRKALDLPPVETFEINPGLNRTNPQMLQAVAELYDGDISKLELFPGGLES LDGPGPVFSAI  
ILDQFERIRNGDRFWFENKLNGLFTDEEIQEIRNVITYRDVLLAVTSADATDIQENVFFWKDGDPCPQAQLE  
ASMLYPCTNATKLNFDGSKAGFGIFIIVLFVVSFLVACMVACLRKYRYKRFQRRRRIAGNGTEKPPVGI  
PAFEWQGHSKQMCPISEVEKRRQLQVDRSGSTHRSNLGNQDCLDVLANDRQNKALLKVPKEYDLVL  
FFEEESKRADFIKYLCELEKEIRQEIRVKELREKELLKEALTKEQRAQIVETFIRHAFSKVLEIQKCDAGMSG  
VSPRRAREVLQCELTASEFADALCLKPDSLFDVSMFTLADKDGNGYLSFQEFLDVMVIFMKGSPEEKSLM  
FSMNDVGGNGYLSKEEFARMLRSFIEISNGALSKTQAEDGIKAMMQAAGFNNKEQISWEDFHLLADHDKE  
LQFAKLNKVGQTCIVKEVPLWMEKEGRKRLSQCQRVSFICPKKSVICFWLCLTVCSNKDKAEGLELRRRK  
NTSIKTPNVYVKAQRQEYIRNPVQQKIQQFKRFIENYRRHIVCFIITYSITVGVTLERCYYYGLQAEATGVPGT  
TVVGIIARGSAAGVSFLPYMLLTVCRLITLCRETFLNRFIPFDA AIDFHRSLAMTAVVLSVAHSLAHVVNI  
YIFSISDLSILSCLFPKVLNNGSELPPKWYWWFLQTVPGITGVLLLLVLAFLMYVFASRYFRHISFRAFWITHY  
LYIVVYILTVIHGSFALLQEPRFYIYLIPPSLLFLDKLISLSRKKVEIPVRAELLP SGVTHLEFKRPSGFVYRS  
GQWVRIACLMLGADEYHPFTLTSAPHEETLSLHIRAVGPWTSQREL YTDESLELGSYPKLYLDGPFGEH  
QEWVDFEVSVLVGGGIGVTPFASILKDLVFKSSIKSKFMCKKVYFIWVTRTQRQFEWVSDIIREVEEMDTQE  
LVSVHTYITQVAEKFDLRTTMLYVCERHFQKVNRSFLTGLRSVTHFGRPPFVSFFNSLQEVHPEVGMGV  
FSCGPPGLTKNVEKACQQMNKRQDQAHFIHHYENF

>fugu-Tr-Duox: DDBJ™ No. BR000283

EVPRFDGWYNSLASARRGAAGAHVRLTPARYWDGVYLPVQEPLMPNPRRLSSLLAGGPSGLAST  
RNQTVLSLFFGYHITFEMFDSRTPGCPPEFMNIPVPKGDPVFDPTATGKVLLPFQRGPSDRDSGQN  
PSNPRSQVNSVTAWLDGSSIIYGPSASWSDSLRSFSGLLASGSEWNMPRGGTHLHVERCRPLYRRT  
WPSGPDELGNWANENFTAAEGIIWFRYHNYVASELHREHPGWSDEELFQKARRTVVATFQNTA  
VYEWLPAHLGDKELPPYPGYQKFVDPGISPEFVAAAIRFGITMVPPGVYMRNKTCHFREVANADGS  
SSPALRLCNSFWSRQSRNMKTSHDLDDLIFGMASQIAEREDNIVVEDLRDFMYGPLRFTRTDLVAV  
TVQRGRDFGLRSYADVRNALDLPPVETFEDLNPELSSSNPKLLRDVADLYSGDISKLELFPGGLES  
LSGPGPVFSAILDQFERLRNGDRFWFENRQNGLFTEEEIQKIRRTTFHRVLVKVTSAGAADLQEDV  
FFWKDGDPCPQPTQLKESMLHPCTNATKLSYFDGSKAGFTVFILVLFVLPAGSSRGEEKLEAEQRN  
QLWGPLVCNGCEMFNTKSALTNQMGVGFGAACEWQGHQKPLLPTVEVSEEKRVQVCDRSGAV  
LRCFDLGVQDHLEVLSNNRHRKAALLKGSKERHLVLFVDNGPDVRFVQLLHQCSSDVGVKEMR  
EEELLQEALTREQRAQIVETFIRHAFSKVLEIDKCDAGMSGVSRKKAKEVLQCELTAAEFADALG  
LKADSLFVDSMFTLADKDGNGSLSFQEFLDVIVIFMKGSSSEKSSLMFSMNDIGGTGSLSKGEFAR  
MLRFDPHFLFILAPVPITRPILPFCRSFIEISNCTLSKKQAEDAIGAMMTAAGFDHKEKITWEDFHF  
LLRDHEKELHVRRPNVYVDPRRERYIRSPVRQKIQHFKRFVENYRRHIVCSALVYGMAAGLCLERC  
YYYGFQAESTGLPETSVVGVVALARGSAAAVSFLFPYMLLTVCRNLTLCRETFLNRYIPFDAAIDFHR  
FMAMAAIVLSVVHTLAHVNNIYIFSLSDLSILSCLFPKVFRRNNGSERPMKWSWWFFQTVPGTLGIL  
LLFTLAFMYVFASRYFRRISFRGFWFTHCLYVVVYALTVIHGSYALIQEPRFHIYLIPPALLFLLDKLI  
LSLRKLEIPVVRAELLPSGVTHLEFKRPQGFVYRSGQWVRIACLTLAGADEYHPFTLTSAPHEDTSL  
LHIRAVGPWTSQRELYAEESVLRGLSEGRTEASPLMSMSPSAAVSITHALFPPKLYLDGPFGEHQ  
EWDDYEVSVLVGGGIGVTPFASILKDLVFKSSAKSKIRCKKVYFIWVTRTQHQQFEWVSDIVREVEE  
MDTQQLVSVHTYITQVAEKFDLRTTMLYVCERRFQKVWNRSLFTGLRSVTHFGRPPFLSFFNSLQD  
VHPEVGKIGVFSCGPPGLTKNVEKACQRMNKRDAQAHFIHHYENF

> tetraodon-Tn-Duox: Ensembl No. GSTENP00025605001

EVPRFDGWYNSLASPRRGAAGSWLVRLMPAHYWDGVYQPVQEPVVRPNPRRLSRLLVGGGPSGLPST  
RNQTVLSLFFGYHVTFEMFDSRTPGCPPEFMNIPVPKGDPVFDPTATGKILLPFQRGPSDKDSGQN  
PSNPRTQVPYPDFNQKKVKEGVVIWTNTCFCFLKHVKVNSATAWIDGSSIIYGPSASWSDSLRSFSG  
GLLASGSEWNMPRQAEGRTFMWSAADPCTGEHGPQGLYELGNSWANENIFTAAEGIIWFRYHNY  
LASRLQQEHPAWSDEELFQNAKIVVATFQNTALYEWLPAHLGDRELPPYPGYQKFVDPGISPELVA  
AAMRFGITMVPPGVYMRNKTCHFQEVVNLGSSSPALRLCNSFWSRRSPNMKTSQDLHLLFGM  
ASQIAEREDNIVVEDLRDFMYGPLRFTRTDLVAVTIQRGRDFGLRSYTEVRNSLDLPPVGSFDDLNP  
ELSSSDPKVKPTNQSSWEGQRLTNVLGVLSLRPRQLLRDIAELYNGDISKLELFPGGLESSESGSPGP  
VFSAILDQFERIRNGDRFWFENRENRYVPLSQTFRANWGSRSRQRTLSHCRLFTEEIQQIRRTTLH  
HVLVAVTSAEATDLQKDVFFWKDGDPCPQPTQLKESMLHPCANATKLSYFDESKAGFTVFILLFL  
FPAVSFLVAYMVAYHRKYRKRKFQRTRKAGDRTAEPVGVAAACEWQGHKKPLLVRVEVSKGKVQV

SECSGSLLRFCNLSQDHLDDVLSNDRQRAALLKGSKEYDLVLFDDDEARRAAVVEHLHRGSAD  
VRVKEMAEELLKEALTREQRAQVVFIRHAFSKVLEIDKCDAGDMSDVSRRKAKEVLQCELTA  
GEFADALGLKPDSLFDVSMFTLADKDGNGYLSFQEFLDVIVIFMKGRSFLEISNCTLSKAQAEDGIR  
AMMQATGFRKEKITWKDFHLLQDHEKELQFAQLNVKGMKRGQRRLSRDQRVSFICPASRWG  
HWFSIIFNCNDHFNTSCSMSAASARRKYTRFADRKSQFLPNVFDPKREQYIRSPIRQKIQQFKRFV  
ENYRRHIVCFIVVYGITAGLCLERCYFFQAESTGLPETSUVGVAFARGSAASISFLFPYMLLTVCR  
NIITLCRETFLNRYVPFDDAIDFHRLMAMTAIVLAGWRSRYEGTHLRARKLTAASPPPVVHTLAHV  
NIYFMSMDSLILACLFPKVFLLNNGSELPMKWSWVFFETVPGTAEVKMVNLSHRKMMMPVHPGCR  
KATRTPILVLLLLGLTGILLFTLAFMYVFASRYFRRISFRGFWLTHCLYVLVYALTVVHGSYAFIQEP  
RFHIYLIPPALLFLLDKLISLRKKLEIPVVRAEELLPSGVTHLEIKRPQGFVYRSGQWVRIACLALGA  
DEYHPFTLTSAPHEGTLHLIRAVGPWTSRLRELYTQDSLQQLGAFPKADGPFGEHGEWDDYEV  
SILVGGGIGVTPFTSILKDLVFKSSMKSIRRCPTVFFPNILKVYFIWVTRTQRQFEWSDVIREVEEM  
DTQELVSVHTYITQVAEKFDLRTTMLYVCERHFQKVWNRSLFTGLRSVTHFGRPPFLSFFNSLQDV  
HPKVGKMGVFCGPPGLTKNVEKACQRMNKRQDQTHFIHHYENF

>sea urchin-Sp-Duox: GenBank™ No. XM\_001176709

MTPRDLRGPICVGLLLCMIALCSGQTENATTVMMMTEVTNGTTAAMMTEVTTVPTQTAQGPSTAQTTSST  
DPPGTTTAPPVTPADEDEPIVNDNELLRSIGAFKDDSHSEPEGYDGWYNNLAHPDWGGAELPLTRRLPVSY  
ADGVYAMAGKDRPNPMSISKATMQGETGQRSHLRRTALMTFFGQQVVEILDAQRGGCPREYENIKIPDGH  
EYLKEKEGISIMPFVRSRYSFNTGYSPNVPREQLNEITPWFDDGLVYGTTKAWADALRSFKDGRADNGEIG  
GEPQFPEQNTLGLPMANPPNPIAEGAARLQRSEFFKLGNPRGNENPFLTFGLVWFRWHNYWADKFKAET  
DWEDERIFNEARKWVIATYQSVVYEWLPGYLNLENETAAEVEYSGYKGYIHPGITHEFQSAAMRFGHTLV  
PPGVMRRENEQCVRFTSTMKSSGFTEQDEFSESQGNHGVRTNSFWNPQHSVREHDIEEFLGMSQVTER  
EDNIITEDLQRRVFGPLEFSRRDLMALNIQRGRDHGLPDYNTARVSLGMDRRETFESINNASAHADGVETFD  
SEVLNLRVYENDIDKVDIWAAGLLETTSNGPGELFRFIILDQFVRSRDRFVFNNSVSGQFTNDQIDFIK  
KVKLWDIIVACTNINGSSLQKDPFHYTPDDPCYDQHPFEGENRTISENDMENCTKLQTFDYFEGSEVSYALS  
LALGIWVVGVAVLLILAHIRQHSIQEARKLQHRKTRSRDPSSLKTYAAAEWCGKKEGSRQVQVKGPGKK  
IRITNERGNKILRTVDLTHYTKVGLLVSPDGKRRHLVVKFDREYDIVLKFSDPDRLEFISDFESFLGSEEVGV  
GRERQEIGEKELLKVAVTKEHRTKLEKFFLMAFSQAFKLDLDFPENLESLNNKETKDILECELTKTEFADVLT  
MKPDSLFEQMFELVDQDNGSISFREFLDVIVVFAKGQPEDKLLMFNMYDIDRSGHLSREEFRQMLKSM  
MEMVSASVEETDLKLIHDMFQNAAGLDKEALSDDFIAVMAEHKDELNNAKLDIAGNIPQIAGQKQDAGPP  
GRGAATVIRRGNLNSRARQTIIRAYKDRDQASTKANGAAKAGAGSGGGVRKRAQSKSVRVETVQEEAKT  
QSSKAYNTVVRFFENNRLQIFYVVLVLLVLAGVFIERAYYYSVEREFAGLRRIAGFGVSVTRGAASAMMFT  
YSSLLVTMCRNTITKLRFLHRYVPFDSALNMHKLIALMLALFFSIMHTIGHSINFYHISTQTADDLTCYFRDF  
FHRSHLPKFHYWAWGTITGFTGILLVMVCTVIYTFQYARRRVFNLFWFTHNMWIIYFILMFLHSGRVLV  
QPPFTHYFALGPVLFVLDKLVSISRKKAEIAVTRAELLPSDVTMLEFKRPQGFYKSGQWVRIACKTSSSEY  
HPFTLTSAPHEENLSLHIRAIGPWTMNLRTYDPNVVREHPLPKLFLDGPYEGHQDWYQYEVAVLVGGGI

GVTPFASILKDIVNKSTIGARVTCKKVYFIWVTRTQKHYEWLTDIIRDVEDNDTNDLVS VHIFVTQFFQKFDL  
RTTMLYICERHFQKISNRSLFTGLKSITHFGRPQFTSFLQSLEDEHPGVGKIGVFSCGPPGMTGGVEQACVDL  
NKFDGAAFIHHYENF

>ascidian-Ci-Duox-A: DDBJ™ No. BR000261 (Chromosome 1p: 60.95k)

LMFCCVIQFVVLINYNDSLVLGQVEVEKEYPPYDGWYNNRAHPEWGTVDGPLTRRLPSHYADGTYA  
PSGGERPNPRTISENTMAGLTGQGSSTKRTALLVFFGQQVVEEILDAQRP GCPPEYFNIPKIPKGDPL  
YDKTGQGNIELPFLRSRYDMSITGYSPNNPRQQLNEITPFIDGGLTYGINKAWADALRFQSKPTDCR  
GELASYKNEGKFPPIENSLGLPLANPPPRDHNTYCIGLYWLG NPRGNENPFLLTFGVLWFRHHNW  
LARYIRDKHSTWSDEKVYNEARILNIAIHQKIIFYDWLPLFLGECLPTYTYGYS AIHPGITHVFQSAA  
MRIGHTLVPPGVYRRNTYNTTTKQCTFLNTTLKTAGDRHAFQALHV NKPGLRTCNTYWNSLEAVV  
ESDIDQLLMGMSSQVAEKEDNIITPDLRGSVFGPLDFSRRDLMALNIQRGRDHGLPDYNTARASFG  
LKKRTTFEEINPDLFAATPGLLGNLTATHDDDISKLDVWTGGLLET LSTGPGELFRHIIRDQFIRIRD  
GDRFWYENSQNGLLTAEDLAFVQATTIRDVILRTNPTMNATYDIQNNPFQAAENDSSLYCPQPRQL  
SELHMEECTEPESFDYFTGSEISYSLTFASFGLFIATILFMYCLGYRSEKRKLQMKKAINKHRSTQQ  
REGDISDIATEVLGTTQSREVQIKLGPGLIHKSSSGRQNYRSIDLSKADDVRFVKAYNHGRNTMF  
LRVDKDTHTDLILMFNDTEERDSFIARCKHFVHSHQISLSEQEVSHNELMDRAQTSEMRDQLLQRF  
FKAALIAVSSIKVEDGDMSDVINSREARKFIHVELSKKEFADY LKLPNSLFDVQMFSSADSDGSGA  
ISFREFLDIMVLFTKGSPEEKAKLMFNMYDLDKSGELSKKEFKVMLKSMMDMVNASVDSEQVEE  
LVNTMLATHGYEHKESLTLEDFTVMQKYSTELSDASLTPGHYIALAYSFCCKIAFTVDSRKPCS  
ARITSNKSKKNFFRN VVNCRLDYRKKFRICDTFKKNRTPETSRIQIKVYEKVF KPGRLNNWL RAME  
NYVENHRLQIFWLTLYLLVLAGIFIERAYFYsverEFAGLRR IAGYGV SITRGAASAMMFTYTSLLVT  
MCRNTITALRETFLHLYIPFDSAITMHRHIAWLALFFTG MHIIGHSLNIYAISTQTPGDLTCLFRDFWR  
TSDVLPKFHYWCWQTITGITGVLLTLIVIVMYTFASDYSRRRVFQWFWWTHNFGYIFLFFMILHG  
SGFLVQDPFFYYFFLGPAILYTLDKLYSVSRKCEISV VNAELLPSEVTHLEFKRPVNFNYKAGQWV  
RIACLAQSQNEYHPFTLTSAPHEDTLKLHIRAVGPWTINLR SIYNPDVLRDSPYPKLYLDGPFGE GH  
QDWYKYDVSVLVGGGIGVTPFASILKDLVSAQSGVKIQCKKVYFMWITRDQKQYEWLTDIIQEVES  
KDASDLLDTHIFITQFPQKFDLRTTMLYICERHFQKVAGKSLFTGLRAVTHFGRPEFKSFFVSLTEE  
HAEVEKFGVFSCGPPPMTSCVEQTC AKLNKYEGASF

>ascidian-Ci-Duox-B: DDBJ™ No. BR000262 (Chromosome 1p: 2.80M)

RRMDGWYNNLDHPQWGS PGERMIRRTNGYSNGINKPMEDGLPNPHTLSRLLMRGESGIPSVTG  
KSVFLAFFAGQHVGDDMIDSRRNACPSEYINIEIEENKESNNHILPMYRSKFITGSGSSVNSPRMLV  
NEATSWLDGSVIYGNSHSWSEHLRSFERGRLKEEDGHPGYP SFNRNEIPLYNPTIDLKRPKTRNP  
EELLSFGNPRGNENPFLMTIEIHWFRWHNHLAEKIAVQNP DWSQQIFDKARKWTIATYQNI AFYE  
WLPEIIGTSPPPYREYNKFMLPSVSVFEFSIAAMRLGHSLVPSGVVLRQPDCSPIDPLPEDY LASAGEP  
ALRLCNTYWQLQDALLDLGIEGIVLGMTSQNAEEEDAVVDDLAGFLYGPLKRTRMDLEAMTIQR  
GRDAGLQRYNEVRKTYDLPPITDFSQLNPSLPNEVIARLRNAYNNDTNKLELYVAGMMEDRSNAS

NVLFYKIILEQFQRTRDGDRLWFENAQNGLFNASELQEIRQTTMRDIAATTTFNRSLFQPNVFNTA  
GSRCASITVRKDMFSKSCPTNTGIDFFYGYWGKYAGIVLLLLLFPFVSYFVMCMIAWKRQYDLAKA  
KKIATQKVTRRKSSSQNEAEIESEDGAVFSGGQDKSRRVVVMLEGTCIKLFSSAGRELRKICFSHF  
KSFLFMSRNKRKDLIVIRVPKEYDVVLRFNDSLERVEAIKNVQEFMQHNGVNVDFEMDESALKE  
EAVTKEARQALLETFLRQTFAEALNIDDAVEQNSKAKYRHKTEVADCELTQMELAETMGMKPDS  
LFVTQMFQLADTDHSGYLSFREFADLILLMNGSPEQKAKMLFDMYDVDHSGEINREEGRNMIKS  
FLEMAGANLGPDEVSAAVSTIFKEAGIGENKDSLTLLEDFTYVLLKDHREAFESSELSMPGRSNLYK  
DQGELSEQNKMSDQRRVDKAKIIFYQKMVQSNQKVFSDATVSHEEKTWFARTWKYLKRNVENYR  
RHIFCMVIFYGITIALVVERATFFYAFGAEHIGIRRVTEWGHISRASAAAISFHFSFILLTMSRNLITTCR  
ETFLKNFIPFDSAVAFHKQIAYVALVETIFHVLGHASNFYHFCVHPLPVLACLFPKIFVDDGSDLPKS  
LTWWFFETITGLTGVLLLLTISIYVFAMQYSRRFCFRAFWITHHLYTVLYILTILHGSLGIVQAPVFH  
FYLVVPPVIFLIDKMITISRSKVQITVIKAEALPSGVNLVFKRPVAFDYQSGQWVRIASLSLGTNEYH  
PFTLTSAPHERYLSLHIRSVGPWTSNLRNLYQTAVEHQGKLPNLYLDGPFGEHGDWYKYEVSVLV  
GAGIGVTPFASILKDIVNRTSTKKGSHIPCKKIYFVWTRTQRHFEWLTDIIRELEETAGGDLVSTHIY  
ITQFANKYDLRTTMLYICERYFQKVANKSMFTGLKAITHFGRPQFEAFDSLQTKHKEVRTLGVS  
CGPPGLTNGVEDACRNLNKLNKARFNHFYENF

>ascidian-Ci-Duox-C: DDBJ™ No. BR000263 (Chromosome 2q: 2.08M)

QQEIGKEFPFNGWYNNRGNPSLGIPDSSLTRSLPHYKDGVEPSGWERPNVRSISNLIFSPPQG  
LPSTNNKTALFLFFGEHVMQDILDTSRPGCPPEYFNIMLNASDSHFSTTEMPYERSSYQASNTGYS  
PNHPREQINAVTSYLDGSGIYGHTKAWSNLRLLRSTCNGRTSTSSLSIGSRRGNENPFVLTIGIT  
WFRHHNWLARNIRDSNPWSDDDVFNEARIQNIAMYQKVLMEWLPGLLGTCSLNQTYSSGTS  
ASVSDIFEGAARHFLSTITPPGVFVRSKFNESCEFRTTSATSPALSCLNSYWEPVKIFASIDGLTMG  
MASQIAELEDNVITPSLRHNYGSRRFSRRDLMATILQKGRDHGLPDYNKVLMEWLPPELLGTCS  
SLNQSQCLNVTPYTGTLYQEFTFFVINWWFVRDHRGSPGELFRYVIADQFLRLRNGDRFWFENV  
KTSLLSSTKLNEILNTTFRDVILRTNPTINGSFDIQDNPFWATGDSKLFQPYQLTENVLEECTPL  
QRYDYFTSSEVSFPLSFAFFGVFALITLLVMYLVGRQRMKSALKTKKDITTKKRATITTSIASGNVTIC  
TEILEFFVKTVYLEYGCVHAIMYHEVFDIYVLSFNDSYELDEFFNELHNFVKPLGLKCNFPAIPEK  
HIMEEARTKEMRDKQLQNFRTALSQAMNIESEDLRPKRKTLDLVKVNITKSEFAEYLKLED  
SLFVEQMFLVADSDEDGTISFREFLDIIVLFTKGTPEKAQLMFNMYDLKSGGLSKEEFTTMLKS  
MEMVNSSADVNDIDSVDMMRANGFSSKDSLNDLFLMLLGQYSDISNQQSTSNHGKTYQAK  
RQSKYHRYSKRFKEGYVCLLHCIKSMFTKLYITHRPQTPQRRLTRKVKTVREYKTKSYEKFFVAL  
VKLTEHYANHIFCLSLYLITAGVFLNAFFVVYSKYATGLYGIGPLMALARASAAALMFNFSTLLLT  
MCRNIITFLRETFLHRFIPFDSAVTMHRIVAWMALAFTALHILAHGINFYIVTQSPDDMACLFRDM  
WYPSDYIPTFVFWLQFQITGITGVILTALIVMYVFASNYARRMIFNWFRWTHKLGYSLSYFFSFVH  
GSGMLISSPQFYFFLVPGILFTLDKVYTYSRKKAYISVVRAELFSPDVTHLEFKRPKNFDYKAGQW  
VRIACLAQSSSEYHPFTLSSAPHEDTLKLHIRAVGPWTRNLRNIYDPNVLRDSPYPKFLFDGPFGE

HQDWYKYEVSVLVGGGIGVTPFASILKDLVNRSQSGVAITCKAVYFIWVTRDQNQYEWLTDIIQEVE  
GKDKKQILNTHIFITQFPQKFDLRTKMLYICEENFQKIAGKSLFTGLRAITHFGRPDFPDFVTLGE  
EHSSVETFGVFSCGPPPMTEGVEKACAKLNKYEGPTFSHHFENF

>ascidian-Ci-Duox-D: DDBJ™ No. BR000264 (Chromosome 1q: 5.10M)

RAADSKEYPSFNGWYNNLANPSSGATETALTRRLKSHYEDGVYAPSGSGRPNPRTLSVEIASGPSG  
LHSYDNKTTLVVYFGQHIIKEIVENSRRQGCPEYFWIPVPEGDEIFDPRGDGNIRLPYHRSPYIASNT  
GYTPNHPRDQLNEVTSLLDGDSIYGSTKAWSGELRLRKQDCELSADDDGKLPMRNTIGLPLQNP  
VVPVYHEMRNAKRLFATGSRTGNENPFLTIGVTWFRHHNWLARQLRDNNPDWSDEHVFMESTR  
RNIATYQKVFFYEWLPILLGSCPSFPIIPFFKWTGYHASVPVGVSNVQSAAMNYLDTMVPPGGFIP  
KTFDRFVLEASINSDMDKWRTCNTYWNSEDLFENATPFNIVYGMGMQMAESEDHIISEDLRNSF  
HGSMEFSRTDKRGRDHGLPDYNTAREDLGLKKKETIRDINPDLFKKDEKLLERLHSLHGGSPSNM  
DIYVGGMLESKDRPGELFRSILEQMVRLRDGDRFWFENLNGLFTVDQVNGIFNVTFDVLRLRT  
YPELNLAGNTAFNPFWKS NKHICRQPYQMTGDNMTSCTTMQRQDDFNHNQISFLAIFCGVFFAI  
ACVIFMIYVGSWKEDKRNKEKTKTTSTYSEQDAFTAKEILGRKRHERKDVQVQFAFTYYIQVITQE  
NNTTHITHITESEEVIMYTD SGKRKKMLLRCAKRTYDLILAFTGSSERDIFLTKLRLFFKQNDILW  
KERAIHEKHFFEEANTKDERDTELSNFYQAVIAQSMRMEFGIQISSFPENLVDIKLSQEEFASLLQM  
KSSSLFVQHIFTTAEDEDQDGFISFHD FRKIIVLFVKGSPNEKLRLLFDMFDLNQNGSLTKQQFKEM  
FVCLADTYQSTVDQNVLENVLSKIVPPKNDEEIQYLNFD DFKKLMDLPEMDEAMLNLTAPGRVILL  
LGQNYRFSNQQKFFTISKILKNCHYNNKMKFPTFLQIQFEAIKQLDLEITGSQMFIFIGKNKKNVYF  
QNSSKFRLAYRAIRRLFECYALHIFWTSLYIWITIGVFLWAFSMTIFNKAAGLGVIAGNALPLARASA  
AALMFNISTLLLTMCNILTSLRETQLHLYIPFDAAVAFHKLVAWMALFFTALHIIAHGINFYSIQTQT  
PSDLLCLFRDLWFPSDYRPTVFWCLQTLTGNTGVLLTIHIVMYVFSLDYPRQVMFNWFQWIHFF  
GYISVYFFTVLHGSGMLIQIPSFYYYFLVPAILYTFDKLYSVYRKKFQLPVIKAEILPSDVVYLEFVRP  
SDFYYKAGQWVRIACVGLSKWEYHPFTLSSSPDEETLQLHIRAVGPWTRNIRNIYKEGEPYPKLYV  
DGPFGEGHQDWYKYEVAVLVGGGIGVTPFASILKDLVNKSTVGVGIPCKSVYFLWVARDQRQFEWL  
LDIIEETEKN DALGILS'THIFITEIPNKFDLRTTMLYVCEQHFKKVSEKSMFTGLNAVTHFGRPNFP  
DFLKTLSWKHSEVKKIGVFSCGPPSMTESVESACLKANKHKGPMYAHHFENF

>nematode-Ce-Duox1: GenBank™ No. NM\_058285

MRSKHVLYIAILFSSIFGGKGIQQNEEFQRYDGWYNNLANSEWGSAGSRLHRDARSYYS DGVYSVN  
NSLPSARELSDILFKGESGIPNTRGCTTLA FFSQVVA YEIMQSNQVSCPLETLKIQVPLCDNVFDKE  
CEGKTEIPFTRAKYDKATGNGLNSPREQINERTSWIDGSFIYGTTPWVSSLRSFKQGR LAEGVPG  
YPPLNNPHIPLNPPAPPQVHRLMSPDRFLMGLDSRVNENPGLLSFGLILFRWHNYNANQIHREHP  
DWTDEQIFQAARRLVIASMQKIIAYDFVPGLLGEDVRLSNYTKYMPHVPPGISHAFGAAA FRFPHSI  
VPPAMLLRKRGNKCEFRTEVGGYPALRLCQNWNAQDIVKEYSVDEIILGMASQAERDDNIVVE  
DLRDYIFGPMHFSRLDVVASSIMRGRDNGVPPYNELRRTFGLAPKTWETMNE D FYKKHTAKVEKL  
KELYGGNILYLDAYVGGMLEGGENGP GELFKEIHKDQFTRIRDGDRFWFENKLNGLFTDEEVQMI



HSITLRDIIKATTDIDETMLQKDVFFFKEGDPCPQPFQVNTTGLEPCVPFMQSTYWTDNDTTYVFT  
LIGLACVPLICYGIGRYLVNRRRIAIGHNSACDSLTTDFANDDCGAKGDIYGVNALEWLQEEYIRQVRI  
EIENTTTLAVKKPRGGILRKIRFETGQKIELFHSMPNPSAMHGPVLLSQKNNHHLVIRLSSDRDLSK  
FLDQIRQAASGINAEVVIKDEENSILLSQAITKERRQDRDLDFREAYAKAFNDSELQDSETSFSSN  
DDILNETISREELASAMGMKANNEFVKRMFAMTAKHNEDSLSFNEFLTTLREFVNAPQKQKLQTL  
FKMCDLEGKKNVLRKDLAELVKSLNQTAGVHITESVQLRFLFNEVLHYAGVSNDAKYLYDDFNAL  
FSDIPDKQPVGLPFNRKKNYQPSIGETSSLNSFAVVDRSINSSAPLTLHKVSAFLETYRQHVFIVFCFV  
AINLVLFFERFWHYRYMAENRDLRRVMGAGIAITRGAAGALSFCMALILLTVCRNIITLLRETVIAQY  
IPFDSAIAFHKIVALFAAFWATLHTVGHCVNFYHVGTSQSEGLACLFQEAFFGSNFLPSISYWFFSTI  
TGLTGIALVAVMCIYVFALPCFIKRAYHAFRLTHLLNIAFYALTLLHGLPKLLDSPKFGYVVVGPVIL  
FVIDRIIGLMQYYKLEIVNAEILPSDIIYIEYRRPREFKYKSGQWVTVSSPSISCTFNESHAFSIASSP  
QDENMKLYIKAVGPWTWKLRLSELIRSLNTGSPFPLIHMKGYPYGDGNQEWMDYEVAIMVGGAGIGVT  
PYASTLVLDLQRTSSDSFHRVRCRKVYFLWVCSTHKNYEWVFDVVKNEVDQARSGILETHIFVTQT  
FHKFDLRTTMLYICEKHFRATNSGISMFTGLHAKNHFGRPNFKAFFQFIQSEHKEQSKIGVFCGP  
VNLNESIAEGCADANRQRDAPSAHRFETF

>nematode-Ce-Duox2: GenBank™ NM\_058283

MAAENFYNVNMFQSLPLEIKVQFSKETLFSALQQEAETQRYDGWYNNLANSEWGSAGSRLHRDA  
RSYYSYDGVYSVNNLSLPSARELSDILFKGESGIPNTRGCTTLAFFFQVVAEIMQSNVSCPLETLKI  
QVPLCDNVFDNECEGKTTIPFYRAKYDKATGNGLNSPREQINERTSWIDGSFIYGTTPWVSALRS  
FKQGRLAEGVPGYPLNPHIPLNPPAPPQVHRLMSPDRLFMLGDSRVNENPGLLSFGLILFRWH  
NYNANQIYREHPDWTDEQIFQAARRLVIAASMQKIIAYDFVPGLLGEDVRLSNYTKYMPHVPPGISH  
AFGAAAFRPHSIVPPAMLLRKRGNKCEFRTEVGGYPALRLCQNWNAQDIVKEYSVDEILGMAS  
QIAERDDNIVVEDLRDYIFGPMHFSRLDVVASSIMRGRDNGVPPYNELRRTFGLAPKTWETMNE  
FYKHTAKVEKLELYGGNLYLDAYVGGMLEGGENGPGEMFKEIKDQFTRIRDGDRFWFENKL  
NRLFTDEEVQMIHSITLRDIIKATTDIDETMLQKDVFFFKEGDPCPQPFQVNTTGLEPCAPLIQSTY  
WDDNDTTYIYTLIGLACIPLICYSIGHYVERRIRIGHNSACDSLTTDFSTESPKVNVYKVNALAWL  
QEEYIRQVRIEIENTTTLVKKPRGGILRKIRFETGQKIEVFHSIPNPSAMHGPVLLSQKNNHHLVIR  
LSSDRDLSKFLDQIRQAASGINAEVVIKDEENSILLSQAITKERRQDRDLDFREAYAKAFNDSELQD  
SETSFSSNDDILNETISREELASAMGMKANNEFVKRMFAMTAKHNEDSLSFNEFLTTLREFVNA  
PQKQKLQTLFKMCDLEGKKNVLRKDLAELVKSLNQTAGVHITESVQLRFLFNDVHLKSGVSDDAEY  
LTCNNFDALFSEISDVQPIGLPFNRKKNYNSHIKEPSCHTSFPVVDHSTPAPLSLIQRICAFLETYRQH  
VFIIFCFVAINIVLFFELFWHSRYLNEDRDLRRVMGAGIAITLSSAGALSFCMALILLTVCRNIITLLR  
ETVIAQYIPFDSAIAFHKIVALFTLFWSTLHTIGHCVNFYHVGTSQSDRGLACLFQETFFGSDVVPVTL  
YWFYGTITGLTGIGLVIVMSIYVFALPKFTRRAYHAFRLTHLLNIGFYALTILHGLPSLFGSPKFGY  
VVGPIVLFVIDRIIGLMQYYKSLDIAHAEILPSDIIYIEYRRPREFEYKSGQWITVSSPSISCTFNESHA  
FSIASSPQDENMKLYIKAVGPWTWKLRLSELIRSLNTGSPFPLIHMKGYPYGDGNQEWMDYEVAIMV

GAGIGVTPYASTLVDLVQKTSSDSFHRVRCRKVYFLWVCSSHKNFVFDMLKNVENQAKPGILE  
THIFVTQMFHKFDLRTTMLYICEKHFRATNSGISMFTGLHAKNHFRPNFKAFFQFIQSEHKEQSE  
IGVFSCGPVNLNESIAEGCADANRQRDAPSAHRFETF

>fruit fly-Dm-Duox: FlyBase No. CG3131

MYSQTEKQRYDGWYNNLAHPDWGSVDSHLVRKAPPSYSDGVYAMAGANRPSTRRLSRLFMRGKD  
GLGSKFNRTALLAFFGQLVANEIVMASESGCPIEMHRIEIEKCEMYDRECRGDKYIPFHRAAYDR  
DTGQSPNAPREQINQMTAWIDGSFIYSTSEAWLNAMRSFHNGTLLTEKDGKLPVRNTMRVPLFNN  
PVPSVMKMLSPERLFLGDPRTNQNPAILSFALFLRWHTLAQRIKRVHPDWSDEDIYQARHTVI  
ASLQNVIVYEYLP AFLGTS LPPYEGYKQDIHPGIGHIFQAAA FRFGHTMIPPGIYRRDGGQC NFKETP  
MGYPAVRLCSTWWDSSGFFADTSVEEVL MGLASQISEREDPVLCS DVRDKLFGPMEFTRRDLGAL  
NIMRGRDNGLPDYNTARESYGLKRHKTWTDINPPLFETQPELLDMLKEAYDNKLD DDDVYVGGM  
LESYGQPGEFFTAVIKEQFQRLRDADRWFWFENERNGIFTPEEIAELRKITLWDIIVNSTDVKEEIQK  
DVMWRTGDPCPQPMQLNATELEPCTYLEGYDYFSGSELMFIYVCVFLGFVPILCAGAGYCVVKL  
QNSKRRRLKIRQEALRAPQHKGSDKMLAREWLHANHKRLVTVKFGPEAAIYTVDRKGEKLR TFS  
LKHIDVVSVEESATNHIKKKPYILLRVPSDHDLVLELESYGARRKFVKKLEDFLLLHKKEMTLMEV  
NRDIMLARAETRERRQRLEYFFREAYALTFGLRPGERRRRSDASSDGEVMTVMRTSLSKA EFAAAA  
LGMKPNDMFVRKMFNIVDKDQDGRISFQEFLETVVLF SRGKTDDKLRIIFDMCDNDRNGVIDKGE  
LSEMMRSLVEIARTTSLGDDQVTELIDGMFQDVGLEHKNHLTYQDFKLMMEKEYKGFVAIGLDCK  
GAKQNFLDTSTNVARMTSFNIEPMQDKPRHWLLAKWDAYITFLEENRQNI FYLFLFYVVTVL FVE  
RFIHYSFMAEHTDLRHIMGVGIAITRGSAA SLSFCYSLLLL TMSRNLITKLKEFPIQQYIPLDSHIQF  
HKIAACTALFFSVLHTVGHIVNFYHVSTQSHENLRCLTREVHFASDYKPDITFWL FQTVTGTTGVM  
LFIIMCIIFVFAHPTIRKKAYNFFWNMHTLYIGLYLLSLIHGLARLTGPPRFWMFFLGP GIVYTLDKIV  
SLRTKYMALDVIDTDLLPSDVIKIKFYRPPNLKYLSGQWVRLSCTAFRPHMHSFTLTSAPHENFLS  
CHIKAQGPWTWKL RNYFDPCNYPEDQPKIRIEGPFGGGNQDWYKFEVAVMVG GGGIGVTPYASIL  
NDLVFGTSTNRYSGVACKKVYFLWICPSHKHFEWFIDVLRDVEKKDVTNVLEIHIFITQFFHKFDLR  
TMLYICENHFQRLSKTSIFTGLKAVNHFRPDMSSFLKFVQKKHSYVSKIGVFSCGPRPLTKS VMS  
ACDEVNKTRKLPYFIHHFENFG

>honeybee-Am-Duox: DDBJ™ No. BR000285

VHSYADKQRYDGWYNNLAHPDWGSIAVDSRLIRKMPAAYS DGVYMLAGQDRPSPRKLSQLFMQG  
DDGLPSVKNRTALFAFFGQLVTSEIIMASESGCPIEYHRIDVDKCDPVFDKECQGNKYIPFR RADYD  
RQTGRSPNSPREQINKVTSWIDGSFVYSSSEAWANTMRSFKNGSLLMEPTRKFPVRNTMRAPLFN  
HAVPHVMRMLSPERLYLLGDPRTNQHPPLLAGILFYRWHNVIAARIQLENPTMSDEDIFQKARRV  
VIGTLQQNIILYEYIPILLNEDLPPYTYGKSDLHPGISHIFQSA AFRFGHTLIPPGLYRRDENCEYRRT  
NTDQPAIRLCSTWWD SNEVL TNSTIEELLMGMTSQAIEKEDNLLGTDIRNNLFGPMEFSRRDLGAL  
NIMRGRDNGLPDYNTARAHFKLPRKKTWNEINPELFNKNP SLLR TLVEIHSNNLNMDVYVGGM  
LESSAGPGELFSTVIKEQFLRLRDSDRWFWFENEENGIFTRSEIADIRRITLWDVIVNATGIPADSIQRK

VFTWEEGDPCPYQLNSTMLEPCVPLQRYDYFEGSELVYIYACVFLGFVPILCAGAGYGLVKLQN  
RRRRRLKILQEAIQKRNDGKICVDKMIVREWLHANHRLVKVKFGPEAALHIVDRKGEKLRTFDF  
NDVNTVTMEESQENENGRKPLVLLRIPRDYDLVLELDSLARRKFIKLEAFLASHKKHFTLSQV  
SRDIMLAKAETKERRQKKLEQFFREAYALTFGLRPGERRRRSESDSDSGEVVTVMRTSLSKSEFASA  
LGMRAVAVFVKMFNIVDKDRDGRISFQEFLDTVLLFSRGKTEDKLRHIFDMCDKDCNGVIDKEEL  
SEMLRSLVEIARTTSLSDDHVTELDGMFQDAGLERKDYLTYNDFKLMKEYKGFVAIGLDCKG  
AKQNFLDTSTNVARMTSFHIDQLPPEDSKTWAQKQWDAISTFLEENRQNIYFLVYVTTIALFVE  
RFIYYSFMAEHTDLRHIMGVGIATRGSAAALSFCYSLLLLTMSRNLLTKLKEFSIQQYIPLDSHIQF  
HKIAACTALFFSVLHTVGHMVNFYHVSTQPLAHLRCLTSELSPSDARLTISFWLFRVTVTGLTGILL  
FIVMTIIFVFAHPTIRQKAYKFFWSTHSLYVVLYALCLIHGLARLTGSPRFWIFFVGPAAIYALDKVVSL  
RTKYMALDIIETELLPSDVIKIKFYRPPNLKYLSGQWVRLSCTAFRSNEFHSFTLTSAPHENFLSCHI  
KAQGPWTWKLRYFDPCNYNPEDEHPKIRIEGPFGGGNQDWYKFEVAVMVGGGIGVTPYASMLN  
DLVFGTSTNRYSGVACKKVYFLWICPSHKHFEWFIDVLRDVERKDVTDVLEIHIFITQFFHKFDLRT  
TMLYICENHFQRLSKKSIFTGLKAINHFGRPDMTSFLKFVQKKHSYVSKIGVFSCGPRPLTKSVMSS  
CDEVNKGRRLPYFIHHFENFG

>mosquito-Ag-Duox: DDBJ™ No. BR000284

LMSHVEKQRYDGWYNNLAHPDWGAVDNHLTRKAPSAYSDBGVYVMAGSNRPSRKL SRLFMRGTDGLPSM  
ENRTALLAFFGQVVTNEIVMASESGCPIEMHRIEIEKCEMYDRECRGDRYIPFHRAAYDRNTGQSPNAPREQ  
INQMTAWIDGSFIYSTSEAWLNAMRSFQDGALLTDKQGTMPVKNTMRVPLFNNPVPHVMRMLSPERLYLLG  
DPRTNQNALLSFAILFLRWHNVVAKRVRQRHRDWSDEEIFQRARRVVIASLQNVAYEYLPALFDKEIPPYDG  
YKADTHPGVSHMFQAAAFRFGHSLIPPGLFRRDGCNFRRTNMDFPALRLCSTWWNSNDVLDNTPVEEFIM  
GMASQIAEKEDPLLCSVDKDFGPMEFTRRDGALNIMRGRDNGLPDYNTARAAYRLPKKKSWRDINPAV  
FERQPELLDLIKTYDNQLDNVDVYVGGMLES DGRPGELFSAVIIDQFTRIRDADRFWFENEDNGIFTKEEIA  
EIRKFTLWDIIVNSTDIEADEIQRDVFWKQGDPCQPEQLNATLLEPCNYLEGYDYFSGSELAYIYSCVFLGF  
VPILCAGAGYCVIKLQNSRRRKLKIKQEAMKNTANTKVSVEKMVAREWLHANHKRLVTVKFGPEASIYTVD  
RKGEKLRTFNLKHVDVVTVEQSQENY TAKKPYILLRVPNDHDLVLELESNSARRKFVKKLEDLVLHKKTM  
TFVESNRDLMLAKAETRERRQKRLHFFREAYALTFGLRPGERRRRSDASLDGEVMTVMRTSLSKSEFAAAL  
GMKQDDMFVRKMFNIVDKDKDGRISFQEFLETVVLF SRGKTDDKLRHIFDMCDNDRNGVIDKGELSEMMS  
LVEIARTT SVTDEQVNELIDGMFQDVGLEHKNHLYEDFKLMKEYKGFVAIGLDCKGAKQNFLDTSTNV  
ARMTSFHIEPISDSRRHWMQEKWDCYTTFLEENRQNIYFLVYVITIVL FVERFIHYSFMAEHTDLRHIMGV  
GIAITRGSAAALSFCYSLLLLTMSRNLLTKLKEFPQQYIPLDSHIQFHKIAACTALFFSLHTVGHIVNFYHVST  
QSIENLKCLTKEVHFTSDYRPDITYWLFQTITGTGVMLFVTMCIFAFHPTIRKKAYKFFWNAHSLYVVLY  
ALCLVHGLARLTGAPRFWFFIGP GIVYTLDKIVSLRTKYMALDVIETDLLPSDVIKIKFYRPPNLKYL SGQW  
VRLSCTEIKPEEMHSFTLTSAPHENFLSCHIKAQGPWTWKLRYFDPCNYNPDQPKIRIEGPFGGGNQDWY  
KFEVAVMVGGGIGVTPYASILNDLVFGTSTNRYSGVACKKVYFLWICPSHKHFEWFIDVLRDVEKKDVTNVL

EIHIFITQFFHKFDLRTTMLYICENHFQRLSKTSMFTGLKAVNHFRPDMSSFLKFVQKKHSYVSKIGVFSCGP  
RPLTKSVMSACDEVNKSARKWPFYFIHHFENFG

>fungus-Pa-NoxA: GenBank™ No. AF364817 (initially termed Nox1)

MGGLVPLLKQLTGSKILFHILFWTFHWGIFAYGWKQAADARLAGLNTLQYSVWLSRGAGLVLSVDGM  
LILLPVCRTIMRFIRPKIKFIPLDENIWMHRQLAYSMLLFTIIHTAAHYVNFYVNEKTQIRPVTAVQIHVYVQPG  
GATGHVMLLCMLLMTTAAHHRIRQQSFETFWYTHHLFIPFLLGLYTHTVGCFVRDTADAISPFAGDEYWEH  
CIGYLGWRWELWTGGFYLIERLYREIRAIRETKITRVVVKHPYDVVEIQFNKPSFKYKAGQWLFLQVPSVSKY  
QWHPFTITSCPYDPYVSVHIRQVGDFTRELGNVAVGAGGIHAKLYEGVDPLGMYDVALANGQKMPALRIDG  
PYGAPAEDVFENEIAVLIGTGIGVTPWASILKNIWHLRNGPNPTRLRREVEFIWVCKDTSSFEWFQTLSSLEE  
QSAEAARVPGSSGVFLKIHTYLTQKLDMDTTQNIVLNSVGSVDPLTELKARTNFRPNFGRIFQSMSEIGQ  
NRTYLNGLGNMRTTVGVYFCGPSAAARDIKKAAKAASSSEVFRFRWKEHF

> fungus-Pa-NoxB: GenBank™ No. AY372210 (initially termed Nox2)

MSGYGGYDGGLRSSGSMKQSERSRWTPLTRMLLSGEMTQERQKELTPREKFDKWMVNEGYRRIFVVFVFMF  
LHAILFAFSFVNFVAVKENLQIARDTFGPTFMIARSAALVLHVDVALILFPVCRTLISMARQTPLNHIIQFDKNIT  
FHITTAWSIVFWSWVHTIAHWNNFAQVAAKNNLGIYGWLLANFVSGPGWTGYVMLIALMGMVITSVEKTR  
RANYERFWYTHHMFIVFFFFWSIHGAFCMIQPDFAPFCISIGTQAIGVFWQYWMYGGFAYLAEVAREIRGR  
HKTYISKVIQHPSNVCEIQIKKEHTKTRAGQYIFCCPAVSLWQYHPFTLTSAPEDYISIHMRVVGDFTRAV  
AETLGCEFDKKGDKASKVVGVDQSNDEVPALRRVLPVRYIDGPFSGASEDVFKYEISVLCGAGIGVTPFAS  
ILKSIWYRMNYPQKRTRLSKVYFFWICRDFGSFEWFRSLLAIEAQDVDNRIEHTYLTAKIKVDDATNIMIN  
DANADKDTITGLRSPTNFRPNWDMIFRGRIRKLHTPAEAGVFFCGPKGLGSQLHVFCNKYSEPGFNFWGK  
ENF

> fungus-An-NoxA: GenBank™ No. AY174088

MGRYPLKSYFAPSKLFFYTWFVGAHIAIFAYGWYHQAKSEPLSPLNVLSSVWISRGAGLVLTVDGTLILLP  
MCRNLVRFLRPKLRWLPLDENIWFHRQVAYATLVFTILHVAAHYVNFYNIERKQLRPETALQIHYAQPAGV  
TGHVMLFCMMLMYTAAHHRIRQQSFETFWYTHHLFIPFLLGLYTHATGCFVRDSAEPYSPFAGERFWKHCI  
GYQGWRWELVAGFFYLCEWLREIRALRETEIVKVVHRPHYDAMEIQFRKPGFKYKPGQWLFIQVPEVSNTQ  
WHPFTITSCPFDDYVSIHVRQVGDFTRALGDALGCGPAQARDLEGLDPMGMYEVALQNGQQMPKLRVDGP  
YGAPAEDVFENEIAVLIGTGIGVTPWASILKNIWHLRASPDPPLRRRVEFIWVCKDTSSFEWFQALLSSLEA  
QSASDAAYQGVSEFLRIHIYLTQRLDQDTTNIYLNLSVGQELDPLTELKSRTNFRPDFKRLFTAMRNLQD  
QSYMRLHHTSRTEIGVYFCGNVAARQIKAAASSASTNEVKFKFWKEHF

> fungus-Mg-NoxA: GenBank™ No. EAA49092

MSVGEFLAKQLTAQKLFNFISFWGFHIGIFAYGWYKQFSDPRLAGLNTLTFVSVWISRGAGLVLSVDGMLILL  
PVCRTIMRWIRPKIRFIPLDENIWFHRQIAYAMLIFSITHAAHYVNFNVERLQIRAQTAVQIHYAQPGGATG  
HMMLLCMLLMTTAAHHRIRQQSFETFWYTHHLFIPFLLGLYTHTVGCFVRDTVEPHSPFAGDEYWNHCIGY  
LGWRWELWTGGFYLLERLYREIRARRETKITRVVRPHYGEFFFLFLLFGPSMVGFVSVLIRDSADVVEIQFN  
KPSFKYKAGQWLFLQVPSVSKYQWHPFTITSCPYDPYVSVHVRQVGDFTKALGDATGAGAAQAKLYEGVD

PMGMYEVALQNGQQMPLRIDGPYGAPAEDVFENEIAVLIGTGIGVTPWASILKNIWHLRNGPNPTRLRR  
VEFLWVCKDTSSEFEWFQTLSSLEQQSTDAAGLPGGNGVEFLKIHSYLTQKLDMDTTQNVLNSVGAALDP  
LTELKSRTNFGRPNFAKLFASMRDGIMDRTYLSGLESGMKTTVGVYFCGPSAAARDIKAACKTASVNEVEF  
RFWKEHF

> fungus-Mg-NoxB: GenBank™ No. EAA56588

MSGYGYGGGGGFRDSYGSEKQGSERSRWTPLTRMLLSGEMTQERQKELTPREKFDRWMVNEGYYRRFFV  
FVFMILHAMVFAFGFVNYAVKDNLQRARDTFGPTFMIARAAALVLHFDVALILFPVCRTFISLARQTPLNGII  
QFDKNITFHITTAWSIVFFSWVHTVAHWNNFAQIAAQKLGWLLANFVSGPGWTGYVMLIALMGMVF  
TSVEKPRRANYERFWYTHHFFIVFFFFWSIHGAFCMIQPDFAPFCMSFGTSAIGVFWQFWMYGGFVYMAERI  
AREIRGKHKTYISKVIQHPSNVCEIQIKKEHTKTRAGQYIFFCCPEVSVWQYHPFTLTSAPPEEDYISIHMRVVG  
DFTRGVSKALGCDWDRKGDASKVVGNGENPDVDPALKRVLPRVYVDGPFSGASEDVFKYEIAVLGAGI  
GVTPFASILKSIWYRMNYPQKKTRLAKVYFFWICRDFGSFEWFRSLLAIEAQDNDRIEHTYLTAKIKADD  
ATNIMINDANADKDAITGLRPTNFGRPNWDMIFRGIRKLHTPAEAGVFFCGPKGLGSTLHIFCNKYSEPFA  
FVWGKENF

> fungus-Mg-NoxC: GenBank™ No. EAA57330

MAKSTTTDGENVKANSENGSTAAASPNDHVKIEPSTKDKGEDKPKAADARDDGSEAEARADQHPEKPAQ  
ANGPETADGDHHPFANSYQVDSARAADDPNVVYL RDDEIETFLDELHDHNGDGCIDYSEVERKLDEVHDEL  
APTAQPHHLHHDQDRERHVFLRSVIGSDQDRIPRADFARVVKSWRVPSMKQEGDKDDQDKYLRDMST  
FRRVRAYWAVHGPEIAFLGIVVGLQLGLGIWQCHKYASGEQYQAAFGWGVALAKLCAGALYPTFFLILS  
MSRYSTFLRRSYHLRSFINWDLSEQEFHIKISIVALVLASLHALGHLSGTFNWGSRPERQDAVGVLLGEDQVP  
RPYSAYVSSLPGITGLTALGLFYTLALLSMPQVRRWNYEVFQLAHLMLFPIIGLLAAHGTAQLLQYAMFGY  
WLA VPTILVLTERLVRVGTGFHRIPASLKVLDDETVELRATIPSERIWKYQAGQWAYLQVPTISMWQWHPF  
TISVCVGKEMRMHIKTDGNWTGRLRDLAKDAPQGQEV DIEINGPFGAPAQRFYDFNHTILVGAGIGLTPF  
SGILADLQAKEDRLHGGPTQKLQEQAEGGDVVRGSTSADAPDGRRIGTSREAEAMPQRTD VDMQAPTSGD  
QSNTTLQETADADSDSASSISRPSSSFSSASDYRRVDFHWMVRDRNHLLWISSELLNTVSRSAWHHRHDAP  
GEYHLDIRMQTHVTQKRKNVSTHVYRWLLEQHRTPEHPASPITGLINPTQFGRPDFVSILDRHYDDMRKYK  
AGLVARASRGGGGEDDAASVADDEVKVG VFFCGTPIVGEILADRCKALTARGRHDGSKIEYHFMIEVFN

> fungus-Fg-NoxA: GenBank™ No. XM\_380915

MGSQLGFVELIKKQFVPGKLLYHFLFWTFHWGIFAYGWKQAVDPRLAGLNTLKFSVWISRGAGLVLSVD  
CMLILLPVCRTVMRWRPKIRFLPLDENLWMHRQLAYSMLLFTCLHTGAHYVNFYNVEITQIRPV TALQIH  
YAQPGGITGHIMLLCMLLMFTSAHARIRQSFETFYTHHLFIPFFLGLYHTVGC FVRDTPEAFSPFAGDEF  
WEHCIGYLGWRWELWTGGAYLLERLWREVRARRSTKITRVRHPYDVVEIQFNKPSFKYKAGQWFLQVP  
SLSKYQWHPFTITSCFPDPYVSVHVRQVGDFTRELGDALGAGAAQAKLYDDVDPMGMYEVALQNGDQMP  
ALRIDGPYGAPAEDVFENEIAVLIGTGIGVTPWAAAILKNIWHLRNSPNPPRRLRRVEFIWVCKDTGSFEWFQ  
TLSSLEEQSNEAARMPGSTGVEFLKIHTYLTQKLDIDTAQNIVLNSVGSQMDPLTELQSR TNFGRPDFPRLFT  
TMRNGILDRTYLNGLSHIRTTVGVYFCGPSAAARDIKLACKAATVPD VDFRFWKEHF

> fungus-Fg-NoxB: GenBank™ No. XM\_390983

MQDWSEKPSERSRWTPLTRMLLSGEMTQEKQQELSSREKFDRWMINEGYRRFFVVFVFMILHALIFSACVH  
YAQKESLETSRQTFGFTFIIARSAALVLHVDVAAILFPVCRTLISLLRQTPLNGILQFDKNITFHIVTAWISIVFWS  
WVHTIAHWNNFAQVAIKYNLGIYGWLLANFVSGPGWTGYVMLIALMGMVLTSMKPRRANFERFWYTHH  
MFIVFFFWSIHGAFCEMIQPDVAPFCTSIGSSAIGVFWQFWMYSGFCYLAERIAREVRGRHRTFISKVIQHPSN  
VCEIQMKKEHTKTRAGQYIFLCCPAVSLWQYHPFTLTSAPEDYISIHMRVCGDFTKELAKSLGCDWSKKK  
DAGDASKVVGLTGREAEIDPAIRRVLPVYVDGPFSGASEDVFKYEVSVLVGAGIGVTPFASILKSIWYRMN  
YPQKTRLSKVYFFWICRDFDSFEWFRSLLAVEAQDLDHRIEHTYLTARIKADDATNIMINDANADKDTIT  
GLRSPTNFRPNWDMIFRGIKIHSPAEGVFGYGGPKGLGSSLHTYCNKYTEPGFSFVWGKENF

>fungus-Fg-NoxC: GenBank™ No. XM\_391371

MAAAHRHRKSVAADHPVRSSQNVEFLTDKEISDFLDDLDHDNDGHINYEEVERKLDQEHANLVP  
KPSAHHVISTDHSDDDRTRHAFLRRMMGDSGVDQIPRDEFKMKVKEWKIPSLKQAKKEEEDKS  
YIKRLPGWRRIRSYWAVHGPVIFLGVVISMQLAFGIWQLVKYQTTTPGYRAAFGWGVMAKTCAGA  
LYPTFFFLILSMSRYFSTWLRSSYHISRFNWDLSQEFHIRISCVAILLATLHAIGHTGFSFVHGSDBA  
NEDAVAEALGPKVPRPYIDYVRSPLPGFTGITALGLFWILCLLIPQVRRWNYEVFQLGHLLMFPIIG  
LMAHGTALLQWPMFGYFLAFPTLLVVERTVVRVGLGFHRIKATMKVLDKETVEVTAIPSERLW  
KYKAGQYIFLQVPKISFFQWHPFTVSVFCRGNKMLHIKTDGNWTAKLRELGGDSGESEIEVGING  
PFGAPAQRFYDFNHSIIIGAGIGVTPFSGILADLQYNDLHDHGGPNHEVDHHRHDSEATAIPQAARR  
SDSSSSDEATTSNVPETPTRQGSVGPDLINKEKQPQADKAGSFAEDYRRVDFHWMVRRERNYLLW  
LSDLLNDVSMQDWHREHEDKPHLDIRINTHVTAQKQKISTHVYRWLLEMHRTDEHPASPLTGLL  
NPTHFGRPDFDLILDEHYEMLKFRASKRTSTRNKEDENYEEDDEELKVGVFYCGAPVVGEILADK  
CRELTLRGWQDGIHELGRIEWLVNYDGYDDHIN

>alga-Cc-NoxD: GenBank™ No. AAZ73480 (insertion of TM7-TM10 in Nox domain, underlined)

MIPRSKPDVARPSARIEAYLSTHAFKVLFFAFYGAAVTLMAFWGFKAEFTFEDNFDMPHFNTVRWFIGIARG  
MGYTLNLNTAFVILLASRLLFKLRDSPLQLVLPFDAAFPALHIVVGYTIFFAVLVHGSFHFVWLITWDAWT  
WGLWSFNMSVITGFLLAIVFGTMLVLARPSVRKNNFRLFYAVHIIGATLFFGLLIHGMFRQVPYTYKWVIPP  
LILYAIRDFLRRRKVSAVELFLSAENAVLKDGDILELRVPKAFSYQAGQYAEVQVPPFINREWHPFTIASAPQD  
KTMCFYIKALGDWTKELRGAFQARVDGAVTDSLQVNIRGPYGAQAQHVGLYERVVLSGGIGSTPPTSICKD  
LHHRKVKENATSATGFEPSTSTLLKRIESRVSTAISTLYGVDISNAKDINQEEEEKRVYLANMLNLTAPGSGS  
SSGETTELEVEMVDASKQADESSSDSRSTSMESYNVKNMLRKEQDEEYILDDIKNSANARRGNRERLSHL  
YEGRSKVLFLHTSRVNLFFFVLIARIFFICISSIIKADYIMINAEPHAIESGLWVIVDTVLSIIFAVLPLTIFLE  
LSYMGRSRRFRTVGRTLDFVFLPLTITSASLGKALVTERTDEQIVFLHYIVFLPLTFVLLAVRMYRALGKRT  
LLTDAPCHCSRDIVPNVDFVWTVPHENDDEWLRSELEPLADGTELKLHRYVTRAKEVDMEAGSEFITSSN  
TGRPEWDEIFGKIAAEAPSNSVVGFFCGPHKMGDSVQSAMRRAEINSNLRGAYLRSTKEKTLMKDLGLPQ  
RGLIKMLMGTGCSVRVVFREENFG

>alga-Py-NoxD: GenBank™ No. ABA18724 (insertion of TM7-TM10 in Nox domain, underlined)

MGDDKPPPKSRVSRVESYLSTNGFVLTFLGLYILANVILFFFAATPERRLWPVGHYRRNLTPVARGAGNLIN  
FNSAVILLVSARKFMSWLRNTPLNMVVPFDKAMPAFHMLVGRVFLAASVVHVGFHLPVYVVSKEPWGPGY  
NGFTQLFITGSMLVALFAILFVTSVRVNRSKRYELFWYSHAICASLGFVLLMIHGLHYGVYWTYRWAAGPM  
AVYIIDRLMRRVEQKEVRMEVSRDVGAIKGNMCLRLPRSFTYEPGQYAEVKVPAISSVQWHPFTIASAPH  
EPELVFYIKKSGDWTTNLHAMFASTDPTQVEIKVRGPYGSPAQHVGVGFENVVLLIGGGVGSTPFASVVKSAH  
NWMAASSTRGPEMSPSSSFNAAAGQVSVAATARDATTVPASASLSARLTMQHSTSAATVTAQARMPTVD  
SLADMEDLSSNGSRIPAARLSDDAALRPPQAPSSFTSDVLERRVAELDRLYSIADKEDNDRVFPSSVQSV  
VEQDMTGHAVDMDGEDGALSDDDDSSRLDEEEEDQLQSQSIGRVLRHSAFINSTAGQOLIGLALDADAD  
VVKQRAAAKEGANRRTSVLGAFFGGLKGGDDRRGTLPSEVVRARTKRVAVLQILHSVSVSLALLWAMVA  
RFAIVALASIMRGFSPSTAGLAMFNTRGLVVADLVLASACAVPLAVSLGCEASILGVSVYFRQGSVLDLTF  
LLPLLLAGVITDALALAGHGRSAAWFASVNLVLPVLLFALLFRLTRVVGSRVLVAQNLOSSHSLRSLDFV  
WTSPPEHDAWLVEELLPIRSRGTVRLHRHITRSAAEVEPWMLDYDEVPLKTTYKRPDWAIFAGITERSRS  
GSVVGVFFCGPHMKSISQDGIARATASLARGYRRGAIGLDGSREMRT

>At-rbohA: GenBank™ No. NM\_120821

MMNRSEMQLGFEHVRYTESPYNRGESSANVATTSNYYGEDEPYVEITLDIHDDSVSVYGLKSP  
NHRGAGSNYEDQSLLRQGRSRSNSVLKRLASSVSTGITRVASSVSSSSARKPPRPLAKLRRSKSR  
AELALKGLKFITKTDGVTGWPEVEKRFYVMTMTTNGLLHRSRFGECIGMKSTEFALALFDALARR  
ENVSGDSININELKEFWKQITDQDFDSRLRTFFAMVDKSDGRLNEAEVREIITLSASANELDNIR  
QADEYAALIMEELDPYHYGYIMIENLEILLQAPMQDVRDGEKGLSKMLSQNLMPQSRNLGAR  
FCRGMKYFLFDNWKRVMALWIGAMAGLFTWKFMEYRKRSAEVMGVVCVIAKGAETLKLN  
MAMILLPVCRNITWLRTKTKLSAIVPFDDSLNFHKVIAIGISVGVGIHATSHLACDFPRLIAADEDQ  
YEPMEKYFGPQTKRYLDFVQSVGVTGIGMVVLMTIAFTLATTWFRNKNLPGPLKKITGFNAF  
WYSHHLFVIVYSLLVVHGFYVYLIIEPWYKKTWMYLMVPVLYLCERLIRAFRSSVEAVSVLKVAV  
LPGNVLSLHLSRPSNFYKSGQYMYLNCASVSTLEWHPFISITSAPGDDYLSVHIRVLGDWTKQLRS  
LFSEVCKPRPPDEHRLNRADSKHWDYIPDFPRILIDGPYGAPAQDYKKFEVLLVGLGIGATPMISI  
VSDIINNLKGVEEGSNRRQSPIHNMVTPPVSPSRKSETFRTKRAYFYWVTREQGSFDWFKNVMD  
VTETDRKNVIELHNYCTSVYEEGDARSALITMLQSLNHAKHGVDVVSCTRVMESHFARNWRSVFK  
RIAVNHPKTRVGVFYCGAAGLVKELRHLSLDFSHKTSTKFIHKENF

>At-rbohB: GenBank™ No. NM\_202070

MREEEMESSEGETNKISRCKATGSDNPDEDYVEITLVRDETINTMKAKATLRSVLSGRLKTMVK  
SLSFASRRDRSKSFGAMFALRGLRFAKNDVGRGWDEVAMRFDKLAVEGKLPKSKFGHCIGMV  
ESSEFVNELFEALVRRRGTSSSITKTELFEFWEQITGNSFDDRLQIFDMVDKNLDGRITGDEVKE  
IIALSASANKLSKIKENVDEYAALIMEELDRDNLGYIELHNLETLLLQVPSQSNNSPSSANKRALNK  
MLSQKLIPTKDRNPVKRFAMNISYFFLENWKRIWVLTWISICITLFTWKFLQYKRKTVEVMGYC  
VTVAKGSAETLKFNMALILLPVCRNITWLRTKSKLIGSVVPFDDNINFHKVVAFGIAVGIGLHAISH  
LACDFPRLHAKNVEFEPMKKFFGDERPENYGWFMKGTGWTGVTMVVLMVAVLAQSWFR

NRANLPKSLKRLTGFNAFWYSHHLFVIVYVLLIVHGYFVYLSKEWYHKTTWMYLAVPVLLYA FERL  
IRAFRPGAKAVKVLKAVYPGNVLSLYMSKPKGFKYTSQQYIYINCSDVSPLQWHPFSITSASGDDY  
LSVHIRTLGDWTSQKLSLYSKVCQLPSTSQSGLFIADIGQANNITRFPRLLDGPGYGAQAQDYRNYD  
VLLLVLGIGATPLISIIRDVLNNIKNQNSIERGTNQHIKQNYVATKRAYFYWVTREQGSLEWFSEVM  
NEVAEYDSEGMIELHNYCTSVYEEGDARSALITMLQSLHHAKSGIDIVSGTRVRTHFARPNWRSVF  
KHVAVNHVNQRVGVFYCGNTCIIGELKRLAQDFSRKTTTKFEFHKENF

>At-rbohC: GenBank™ No. NM\_124485

MSRVSFEVSGGYHSDAEAGNSGPMSSGGQLPPIYKKPGNSRFTAENSQRTRTAPYVDLTVDVQDDT  
VSVHSLKMEGGSSVEESPELTLKRNRLKKTTVVKRLASVSHELKRLTSVSGGIGGRKPPRAKL  
DRTKSAASQALKGLKFKISKTGAGWSAVEKRFNQITATTGGLLRRTKFGECIGMTSKDFALELFD  
ALARRRNITGEVIDGDQLKEFWEQINDQSFDSRLKTTFFDMVDKADGRLTEDEVREIISLSASANN  
LSTIQKRADEYAALIMEELDPDNIGYIMLESLETLQLQAATQSVITSTGERKNLSHMMSQRLKPTFN  
RNPLKRWYRGLRFFLLDNWQRCWVIVLWFIVMAILFTYKYIYRRSPVYPVMGDCVCMAGAAET  
VKLNMALILLPVCRNITWLRNKTRLGRVVPFDDNLNFHKVIAVGIIVGVTMHAGAHACDFPRL  
HATPEAYRPLRQFFGDEQPKSYWHFVNSVEGITGLVMVLLMAIAFTLATPWFRRGKLNYPGPKL  
KLASFNAFWYTHHLFVIVYILLVAHGYLYLTRDWHNKTTWMYLVVPVLYACERLIRAFRSSIKAV  
TIRKVAVYPGNVLAIHLSRPQNFYKSGQYMFVNCAAVSPFEWHPFSITSAPQDDYLSVHIRVLDG  
WTRALKGVFSEVCKPPPAGVSGLLRADMLHGANNPDFPKVLIDGPGYGAQAQDYKQYEVLLVGLG  
IGATPMISIVKDIVNNIKAKEQAQLNRMENGTSEPQRSKESFRTRRAYFYWVTREQGSFDWFKNI  
MNEVAERDANRVIEMHNYCTSVYEEGDARSALIHMLQSLNHAKNGVDIVSGTRVMSHFAKPNWR  
NVYKRIAMDHPNTKVGVFYCGAPALTKELRHLALDFTHKTSTRFSFHKENF

>At-rbohD: GenBank™ No. AF055357

MKMRRGNSSNDHELGIIRGANSNTSDTESIASDRGAFSGPLGRPKRASKKNARFADDLPKRSNS  
VAGGRGDDDEYVEITLDIRDDSVAVHSVQQAAGGGHLEDPELALLTKKTLESSLNNTSLSFFRST  
SSRIKNASRELRRVFSRRPSPAVRRFDRTSSAAIHALKGLKFIATKTAAWPAVDQRFDKLSADSNGLL  
LSAKFWECLGMNKESKDFADQLFRALARNNVSGDAITKEQLRIFWEQISDESFDAKLQVFFDMV  
DKDEDGRVTEEEVAEIIISLSASANKLSNIQKQAKEYAALIMEELDPDNAGFIMIENLEMLLLQAPNQ  
SVRMGDSRILSQMLSQKLRPAKESNPLVRWSEKIKYFILDNWQRLWIMMLWLGICGGLFTYKFIQY  
KNKAAYGVMGYCVCVAKGGAETLKFNMALILLPVCRNITWLRNKTKLGTVPFDDSLNFHKVIA  
SGIVVGVLHAGAHLCDFPRLIAAEDTYEPMKEYFGDQPTSYYWVFKGVEGWTGIVMVVLMIA  
AFTLATPWFRRNKLNLPNFKKLTGFNAFWYTHHLFIIVYALLIVHGIKLYLTKIYQKTTWMYLA  
VPILLYASERLLRAFRSSIKPVKMIKAVYVPGNVLSLHMTKPPQGFYKSGQFMLVNCRAVSPFEWHP  
FSITSAPGDDYLSVHIRTLGDWTRKLRVTFSEVCKPPTAGKSGLLRADGGDGNLPPKVLIDGPGY  
APAQDYKQYDVLLVGLGIGATPMISILKDIINNMKGPDRDSDIENNNNSNNNSKGFKTRKAYFYWV  
TREQGSFEWFKGIMDEISELDEEGHIELHNYCTSVYEEGDARVALIAMLQSLQHAKNGVDVVSCTR  
VKSHFAKPNWRQVYKQIAVQHPGKRIGVFYCGMPGMIKELKNLALDFSRKTTTKFDHFKENF



>At-rbohE: GenBank™ No. NM\_101781

MKLSPLSFSTSSSFHADGIDDGVELISSPFAGGAMLPVFLNDLSRNSGESGSGSSWERELVEVTLE  
LDVGDDSDILVCGMSEAAASVDSRARSVDLVTARLSRNLSNASTRIRQKLGKLLRSESWKTTTSSTAGE  
RDRDLERQTAVTLGILTARDKRKEDAKLQRSTSSAQRALKGLQFINKTTRGNSCVCDWDCDCDQM  
WKKVEKRFESLSKNGLLARDDFGECVGMVDSKDFAVSVFDALARRRRQKLEKITKDELHDFWLQI  
SDQSF DARLQIFFDMADSNEDGKITREEIKELMLLSASANKLAKLKEQAE EYASLIMEELDPENFG  
YIELWQLETLLLQRDAYMNYSRPLSTTSGGVNNWQRSWVLLVWVMLMAILFVWKFL EYREKAAF  
KVMGYCLTTAKGAAETLKNMALVLLPVCRNLTWLRSTRARACVPFDDNINFHKIIACIAIGILV  
HAGTHLACDFPRIINSSPEQFVLIASAFNGTKPTFKDLMTGAEGITGISMVILT TIAFTLASTHFRRN  
RVRLPAPLDRLTGFNFWYTHHLLV VVYIMLIVHGTFLLFADK WYQKTTWMYISVPLVLYVAERSL  
RACRSKHYSVKILKVSMLPGEVLSLIMSKPPGFKYKSGQYIFLQCPTISRFEWHPFSITSAPGDDQL  
SVHIRTLDGWTEELRRVLT VVGKDLSTCVIGRSKFSAYCNIDMINRPKLLVDGPYGAPAQDYRSYDVL  
LLIGLGIGATPFISILKDLLNNSRDEQTDNEFSRSDFSWNSCTSSYTTATPTSTHGGKKKAVKAHFY  
WVTREPGSVEWFRGVMEEISDMDCRGQIELHNYLTSVYDEGDARSTLIK MVQALNHAKHGVDILS  
GTRVRTHFARNWKEVFSS IARKHPNSTVGVFYCGIQTVAKELKKQAQDMSQKTTTRFEFHKEHF

>At-rbohF: GenBank™ No. NM\_105079

MKPFKNDRRRWSFDSVSAGKTAVGSASTSPGTEYSINGDQEFVEVTIDLQDDDTIVLRSVEPATAI  
NVIGDISDDNTGIMTPVSISRSPTMKRTSSNRFRQFSQELKAEAVAKAKQLSQELKRFSWSRSFSGN  
LTTTSTAANQSGGAGGLVNSALEARALRKQRAQLDRTRSSAQRALRGLRFISNKQKNVDGWNDV  
QSNFEKFEKNGYIYRSDFACIGMKDSKEFALELFDALSRRRRLKVEKINHDELYEYWSQINDES F  
DSRLQIFFDIVDKNEDGRITEEEVKEIIMLSASANKLSRLKEQAE EYAALIMEELDPERLGYIELWQ  
LETLLLQKDTYLNYSQALSQALSQNLQGLRGKSRIHRMSSDFVYIMQENWKRIWVLSLWIMIM  
IGLFLWKFFQYKQKDAFHVMGYCLLTAKGAAETLKFNMALILFPVCRN TITWLRSTRLSYFVPFDD  
NINFHKTIAGAIVVAVILHIGDHLACDFPRIVRATEYDYNRYL FHYFQTKQPTYFDLVKGPEGITGIL  
MVILMIISFTLATRWFRRNLV KLPKPFDRLTGFNAFWYSHHLFVIVYILLILHGIFLYFAKPWYVRTT  
WMYLAVPVLlyGGERTLRYFRSGSYSVRLKVAIYPGNVLT LQMSKPTQFRYKSGQYMFVQCPAVS  
PFEWHPFSITSAPEDDYISIHIRQLGDWTQELKRVFSEVCEPPVGGKSGLLRADET TTKKSLPKLLID  
GPYGAPAQDYRKYDVL LVLGIGATPFISILKDLLNIVKMEEHADSISDFRSSEYSTGSNGDTPR  
RKRIKTTNAYFYWVTREQGSFDWFKGVMNEVAELDQRGVIEMHNYLTSVYEEGDARSALITMVQ  
ALNHAKNGVDIVSGTRVRTHFARNWKKVLT KLSSKHCNARIGVFYCGVPVLGKELSKL CNTFNQ  
KGSTKFEFHKEHF

>At-rbohG: GenBank™ No. NM\_118641

MQRVSFEVKDTEAEKSSSEILSGSLPSTYRNPAMENVGNAVDDGSSVKNNPKLDMQKQNGLVK W  
FKKCLTMVSGESKAPRLDRSKSTAGQALKGLKIISKTDGNAAWTVVEKRYLKITANTDGLLLRSKF  
GECIGMNSKEFALELFDALARKSHLKG DVITETELKKFWEQINDKSFD SRLITFFDLMDKSDSGRL  
TEDEVREIHKLSSSANHLSCIQNKADEYAAMIMEELDPDHMGYIMMESLKKLLLQAETKSVSTDIN

SEERKELSDMLTESLKPTRDPNHLRRWYCQLRFFVLD SWQRVWVIALWLTIMAILFAYKYIQYKNR  
AVYEV L GPCVCLAKGAAETLKLNMALILLPVC RNTITWLRNKTRLGVFVFPDDNLNFHKVIAVGIAI  
GVAIHSVSHLACDFPLLIAATPAEYMPLGKFFGEEQPKRYLHFVKSTEGITGLVMVFLMVIAFTLAM  
PWFRRGKLEKPLPGPLKKLASFNAFWYTHHLFVIVYILLV LHGYIYLNKEWYKKT TWMYLAVPV  
ALYAYERLIRAFRSSIRTVKVLKMAAYPGKVLTLQMSKPTNFKYMSGQYMFVNCPAVSPFEWHPFSI  
TSTPQDDYLSVHIKALGDWTEAIQGVFSEVSKPPPVG DMLNGANSRFPKIMIDGPYGAPAQDYKK  
YEVVLLIGLGIGATPMISIIKDIINNTETKEQLSQMEK GSPQEQGNKETFKTRRAYFYWVTKEQGT  
FDWFKNIMNEIAERDKSKVIELH NHCTSVYEEGDVRSALIRMLQSLNYAKNGLDIVAGTRVM SHFA  
RPNWKNVYKQIAMDHPGANVGVFYCGAPVLTKE LRQLALEFTHKTSTRFSFHKENF

>At-rbohH: GenBank™ No. NM\_125394

MKSNTPTEDSTKWMLSESVEIDSMGESSSKEPEINLNKN EGGLKKNASRN LGVGSIIRTL SVSNWR  
KSGNLGSPSTRKSGNLGPPTNAVPKKTGPQRVERTTSSAARGLQSLRFLDRTVTGRERDAWR SIEN  
RFNQFSVDGKLPKEKFGVCIGMGDTMEFAAEVYEALGR RRRIETENGIDKEQLKLFWEDMIKKDL  
DCRLQIFFDMCDKNGDGKLT EEEVKEVIVLSASANRLGNLKKNAAYASLIMEELDPDHKGYIEM  
WQLEILLTGMVTNADTEKMKKSQTLTRAMIPERYRTPMSKYVSVTAELMHENWKKLWVLALWAI  
NVYLFMWKYEEFMRNPLYNITGRVCVCAAKGAAETLKLNMALILVPVCRKTLTILRSTFLNRVVPFD  
DNINFHKVIAYMIAFQALLHTALHIFCNYPRLSSCSYDVFLTYAGAALGNTQPSYLGMLTSVSITGV  
LMIFFMGFSFTLAMHYFRRNIVKLPKPFNVLAGFN AFWYAHLLV LAYILLIHHGYLIIIEKPWYQK  
TTWMYLAVPMLFYASERLFSRLLQEHSHRVNVIKAI VYSGNVLALYVTKPPGFKYKSGMYMFVKCP  
DLSKFEWHPFSITSAPGDDYLSVHIRALGDWTT ELRSRFAKTCEPTQAAAKPKPNSLMRMETRAA  
GVNPHIEESQVLFPKIFIKGPYGAPAQNYQKFDILLVGLGIGATPFISILKDMLNHLKPGIPRSGQK  
YEGSVGGESIGGDSVSGGGGKFPQRAYFFWVTREQASFDWFKGVMDDIAEYDKTHVIEMHNYLT  
SMYEAGDARSALIAMVQKLQHAKNGVDIVSESRHSLSSYKYLNYISTP

> At-rbohI: GenBank™ No. AL161531

MSMSFSGGTHNDRWGS DLASAGEFTQSFPSLPATYSPSPSSSSSSGEELLEVTIEFP SGVIINIDSVT  
GTGTDISGTDLEITSCSDSGSGSRSLSLGWSASSERL TAGTNSKQIQKISR RRGYGYSSRSAPEPVVP  
HRGEITDSVNLPRALSQRPTRPNRD GSGTERAIHGLKFISSEKENGIVDWN DVQNNFAHLSKDGYLE  
KSDFAH CIGLENENSKEFADELFDALCRRRRIMVDKINLQELYEFWYQITDES FDSRLQIFFNMYC  
YQLSSNLVKHIDQHIIILSASANNLSRLRERAE EYAALIMEELAPDGLYSQYIELKDLEILLEKDISH  
SYSLPFSQTSRALSQNLKDRRWRMSRNLLYSLQDNWKRIWVLT LWFVIMAWL FMWKCYQYKHKD  
AFHVMGYCLVMAKGAETLKFNMALILLPVC RNTITYLRSTALSHSVPFDDCINFHKTISVAIISAM  
LLHATSHLACDFPRILASTD TDYKRYLVKYFGVTRPTYFGLVNTPVGITGIMVAFMLIAFTLASRRC  
RRNLTKLPKPFDKLTGYN AFWYSHLLLLTVYVLLVIHGVSLYLEHKWYRKT VWMYLAVPVLLYVG  
ERIFRFFRSRLYTV EICKVVIYPGNVVVLRMSKPTSFDYKSGQYV FVQCPSVSKFEWHPFSITSSPGD  
DYLSIHIRQRGDWTEGIKKA FSVVCHAPEAGKSGLLRADVPNQRSFPELLIDGPYGAPAQDHWKYD  
VLLVGLGIGATPFVSILRDL LNIIKQEQEAECISGSCSN SNISSDHSFCLNSEAAS RIPQTQRKTL

NTKNAYFYWVTREQGSFDWFKEIMNEIADSDRKGVIEMHNYLTSVYEEGDTRSNNLLTMIQTLNHA  
KNGVDIFSGTKVRTHFGRPKWKKVLSKISTKHRNARIGVFYCGVPSLGKELSTLCHEFNQTGITRF  
DFHKEQF

>At-rbohJ: GenBank™ No. NM\_114450

MKNNKKVGTEDSTKWMLESVEIDPKGDSSVKQPESTINSNNPESGAGGGILKNVSKNLAVGSIIRSMSVNK  
WRKSGNLGSPSTRKSGNLGPPLPVSQVKRPGPQRVERTTSSAARGLQSLRFLDRVTVTGRERDSWRSIENRFN  
QFAVDGRLPKDKFGVCIGMGDTLEFAAKVYEALGRRRQIKTENGIDKEQLKLFWEDMIKKDLDCRLQIFFD  
MCDKDGDKLTEEEVKEVIVLSASANRLVNLKNAASYASLIMEELDPNEQGYIEMWQLEVLTTGIVSNAD  
SHKVVRKSQQLTRAMIPKRYRTPTSKYVVVTAELMYEHWKKIWWVTLWLAVNVVLFMWKYEEFTTSPY  
NITGRCLCAAKGTAEILKLNMALILVPVLRRTLTFLRSTFLNHLIPFDDNINFHKLIAVAIAVISLLHTALHMLC  
NYPRLSSCPYNFYSDYAGNLLGAKQPTYLGLMLTPVSVTVGLMIIFMGISFTLAMHYFRNIVKLPFNFRLA  
GFNSFWYAHLLVIAAYALLIHHGILYIIEKPWYQKTTWYVAIPMVLYASERLFSRVQEHNRVHIKAIVYS  
GNVLALYMTKPQGFYKSGMYMFVKCPDISKFEWHPFSITSAPGDEYLSVHIRALGDWTSELNRNFAETCE  
PHQSKPSPNDLIRMETRARGANPHVEESQALFPRIFIKGPYGAPAQSYQKFDILLIGLGIGATPFISILKDM  
NLLKPGIPKTGQKYEGSVGGESLGGSSVYGGSSVNGGSSVNGGSSVSGGGRKFPQRAYFYWVTREQASFE  
WFKGVMDIAVYDKTNVIEMHNYLTSMYEAGDARSALIAMVQKLQHAKNVGDIVSESRIRTHFARPNWR  
KVFSELSNKHETSRIQVYCGSPTLVRPLKSLCQEFSLSTRFTFHKENF

>amoeba-Dd-NoxA: GenBank™ XM\_630972

MRLPTKEEIQRYWVNEGKLLVILYTLGNIAAFVYTFVHYNSPAFEVVGVCFARGCAQLLKLN  
CALILVPVLRNLLSFLRGTFLNNYVPFDKNIVFHKLIAWVICFATFGHVMMAHFNNFRLYQDITPQEY  
KRILGIDYPNLTPIKYAFATLAGWTGHVVCIVMVLMYTSAVESIRRPMFEGFWYTHHLFVVFGLLV  
VHGLHSILEPTSFWKWVIGPCALYIVERLIRLLRSKKTMLIQARIHPSRVIEVRMKTFRFKYKPGQ  
YLFLNCPTIAQNEWHPTTITSAPEEDFVSCHINVVGNWTGKLS'TLLNPDKKMGIVQENVLKSPDG  
KPILRIDGPFGAASEEVFKYKQVILVGAGIGVTPFASILKHIKYQMARTYNTT'PLIDKVHFYWICRDR  
NSFEWFSGLIGELEMEMHNNFLEIHPYLTGALSAQEIRDVMYGDEEKDLITGFTTPTQFGRPKWD  
EIFADHALRYAEKDVGVFFCGPKLLSKSLYKASTHYTKTTTCRFHYNKENF

>amoeba-Dd-NoxB: GenBank™ No. XM\_632294

MNEKKELQQELELQEFQTPKNQQLEKLQEPNGEISSTGNETSESGISSPPISQNDNSNNENESLNI  
TPNKPFVSMQEELQNLDIENIPIPTIQT'PKIYKNTNLIHSKNNLSLPISLSQENIVKLDKVDIESN  
DQVNSNTDNNNTN'NNNNNTN'NNKNEKIGLRSKIFKSKIFIKIRGWWWHRGISTYIMLFYIALNIGV  
GVHMFYNYMHSDFKFLGLSFCFSRTAARLINLNSAVILLPVLNRNFLSWLRGTIVNNYIPIDKHLNF  
HKLCAFMLFCCTIIHCVGHYISFKKINDDV'LKIDDGKSVAGDYLNININNFPEKYLFFKSVPGITG  
HIMLLILILIVSSSMWRIRRPMFEIFWYVHHLFIPFYILLCFHGYSKILKKDPQSWMWIAPFILYSIE  
RLIRIARSKKR'VILEKAIMHPSKVLELRMKRDNDNFNFKPGQYLYLNCPSIAYHEWHPTTITSA  
PDDPFISVHINIVGNWTRKLFKLLNPDNKLGLIQEDLKSTQNRGKRRILKIDGPFGAPAENFFKYRNVLV  
IGAGIGVTPFSSILRHLKNQNDKQTNADENHLKINKIYFIWISRQKNSFQWFTDILAELENDERIDS

LEIHIFLTGALELDDYAKIKNAQKCHITNLHSKTLFGRPNFRSIFNQLTQLHQREKIGVFYCGNKAL  
GKNIKNCNKFNGKNNCHLIFHKENF

>amoeba-Dd-NoxC: GenBank™ XM\_630295

MEKQKNISIKKFANPLSFPHEFRTNLHKSTFLDASLLELPNISVDKTKNENNFSITDKILMESLKENEFKIREFI  
KNQESGNRVLMIDKNSLKELFNINDNQALDLIFNQYVQSTRPNLIRKSSNSLNIDLKKEIKKTKKSRKSFSR  
NSKLNNDKIDDKNDNYIDKINDINNFNSDIEEIFKKEIENTLKIPIGGNSFPIPVFNNNNNNNNNNNNNN  
NNNNYNNNIDNNNNNNNNNNNNNNINNCNNNNINNDNNNNNNNDNDNNNINTVDNHDDDIINNSNNFNKN  
EYPSSNISPIPKSSISSFPTNLNNSINNTGSMVSDLSSCRNSISSSSIDSSVASIPITIQSIDFEDKNIKSDQFKIISK  
SNIENTIETNPIPPFNQTNNOCEVQLQSHSLPTILKQPHIYKSKSFSSINSNSKIKKIKKSRSEIESKINLFDVIN  
HIYLNLSKVGSEEQKITSVFKLYDIYDKGFISRDDLKEVLNRYRTKQNGLKFQDFTMESLIDHIFQQFDKNMDG  
YIDFEEFKSELINNENKVKEKEENTNYNFKENIGIYTEKESFHSLKRYLKIEGSKLFFISLFFIINSILVITSFLN  
VHANNKRAIELFGPGVYITRIAAQLIEFNAAILMTMCKQLFTMIRNTKFKFLFPVDKYMTFHKLIGYTLIASF  
LHTIGWIVGMAVATGKPDNIFYDCLAPHFKFRPTVWEMIFNSLPGVTGFIMISFLIIMAILSLKIIRKSNFELFY  
YSHHLFIGFYVLLILHGTMGWIRPPTFWKWFIVPGFFYTVDRSFLFKRTHRVEVLDYCLKNERVINLTFSKP  
PSFDYKPGQYLLINVPHISKLQWHPFTMTSSPLEDKIYVHIRVTGNWTKKLRWLSIKKQLQQQQLYNNIK  
QQNVLPDGSNFIINNNNNIDQIDLEIGLKPFRINIDGPFSSSYALKQKQVILVGAGIGVSPMASLLKDISLKK  
QRLQLLNQGDQIALEQSKNEITTKFGLGNLEKVHFFWLNDRDQHSFQWFEDLLIDISTNGNSNLPKISINTFNT  
RVFPKNDVRVFMWLWNGLDKLFKAQGLDPTTNLFPKTHWGRPNWDTIFQYYSKKYSGESISVFCGPSQLSK  
ELYEKCRYYTCLKTGGTKFYFHKENF
