# Supplementary material for: Molecular evolution of the reactive oxygen-generating NADPH oxidase (Nox/Duox) family of enzymes
Source: Springer Nature journal article supplement (doi:10.1186/1471-2148-7-109), 2007-07-06
Supplement: 12862_2007_403_MOESM5_ESM.pdf [file 12862_2007_403_MOESM5_ESM.pdf]

Additional file 5

### Alignment of Nox-domains of Nox and Duox proteins

Amino acid sequences were trimmed to the length corresponding to human Nox2 and aligned. The amino acid numbers were re-calculated to indicate those corresponding to the full-length sequences after alignment. Above the alignment, predicted domains of human Nox2, which contains six transmembrane domains TM(I) through TM(VI), two FAD binding subregions FAD1 and FAD2, and four NADPH-binding subregions NADPH1 through NADPH4, are shown. To describe sequences of the different species, we used the following naming: Hs (as *H. sapiens*), Bt (*B. taurus*), Cf (*C. familliaris*), Rn (*R. norvegicus*), Mm (*M. musculus*), Gg (*G. gallus*), Md (*M. domestica*), Xt (*X. tropicalis*), Dr (*D. rerio*), Tr (*T. rubripes*), Tn (*T. nigroviridis*), medaka (*O. latipes*), Ci (*C. intestinalis*), Sp (*S. purpuratus*), Dm (*D. melanogaster*), Ag (*A. gambiae*), Am (*A. mellifera*), Ce (*C. elegans*), At (*A. thaliana*), Dd (*D. discoideum*), Pa (*P. anserina*), An (*A. nidulans*), Mg (*M. grisea*), Fg (*F. graminearum*), Cc (*C. crispus*) and Py (*P. yezoensis*). Amino acids conserved among all Nox and Duox proteins (shown in Figure 6) are indicated by *asterisks* below the alignments.

```

                                     _____ TM (I) _____
Hs-Nox1  -----MGNWVVNHWF SVLFLV VVWLG LNVFLF VDAFLKY 33
Cf-Nox1  -----MGNWVVNHWF SVLFLATW LG LNVFLF VHAF LSY 33
Mm-Nox1  -----MGNWLVNHWLSV LFLVSWL G LNI FLFVYA FLNY 33
Rn-Nox1  -----MGNWLVNHWLSV LFLVSWL G LNI FLFVYV FLNY 33
Gg-Nox1  -----MGNWLVNHWFSA AVLA AWL G INI FLFTYY FLFF 33
Xt-Nox1  -----MGNWIANNWF SVVVLATW LG LNI FIF INFF MIF 33
Tn-Nox1  -----MGNWIVNHGLT SFILV VVW G INI FLFVWF YLFY 33
Tr-Nox1  -----MGNWII NHGLT AFILV VVW G INI FLFVWF YLFY 33
O1-Nox1  -----MANWII NNGFP AVMV LVWMT INTFL FVWYY LQY 33
Dr-Nox1  -----MGNWII NHGLS AFIVV VVW M AINIAL FVHF YLFY 33
Mm-Nox2  -----MGNWAVNEGLS IFVILV VLG LNVFLF INYK VY 33
Rn-Nox2  -----MGNWAVNEGLS IFVILV VLG LNVFLF VKYK VY 33
Hs-Nox2  -----MGNWAVNEGLS IFVILV VLG LNVFLF VVYY RVY 33
Cf-Nox2  -----MGNWIE NEGLS IFVILV VLG LNVFLF IWFY G VY 33
```

Gg-Nox2 -----MGNWVENEGLSIFVVLVWLG LNVFLFWWFYLAY 33  
Xt-Nox2 -----MGNWIVNEGLSIAV IIVWLG LNYLFWNFYLVY 33  
Tn-Nox2 -----MGNFAANEGLSVFV ILVWLG INAFVHFYMAF 32  
Tr-Nox2 -----MGNFAANEGLSTFV ILVWLG INAFVHFYMAF 32  
Ol-Nox2 -----MGNFVANEGLSIFV ILVWLG INAYL FVQFYMNF 32  
Dr-Nox2 -----MGNFAANEGLSVFV ILVWLG INVFLFVYFYLAF 32  
Hs-Nox3 -----MMGCWILNEGLSTILVLSWLG INFYLFIDTFYWY 32  
Cf-Nox3 -----MMGCWILNESLSVILVLSWLG VNL YLFIDTFWCWY 32  
Mm-Nox3 -----MPVCWILNESGSFV VALLWLA VNAYL FIDTFWY 32  
Rn-Nox3 -----MPTCWILNESVSFV VALLWLA INIYLFIDTFWCWY 32  
Gg-Nox3 -----MACWILNEKLSV LLLL VWLG LNL YLFIDTFHWY 33  
Ci-Nox2 -----MNARLNGFLVNEFPKYIV FLLWLG LNGFLFGY YNFY 37  
Sp-Nox2A -----MGDKFLNEGLKYFF LLLWLA ANVAYWV VTFVY 33  
Sp-Nox2B -----AAWAI VNL I IWL VTFKY 18  
Mm-Nox4 -----MAVSWRSWLANEGVKHLCLL I WLSLNVLLFWKTFLLY 37  
Rn-Nox4 -----MALSWRSWLANEGVKHLCLL V WLSLNVLLFWKTFLLY 37  
Hs-Nox4 -----MAVSWRSWLANEGVKHLCLF I WLSMNVLLFWKTFLLY 37  
Cf-Nox4 -----MENAVMILCTEY YEHDEEY IDYRF I WLSLNVLLFWKAFLLY 41  
Gg-Nox4 -----  
Xt-Nox4 -----MALPCASWLSNEALKHLFLLS W LALNIGLFYKTFVY 37  
Ol-Nox4 -----MAVSVRSWLANEAGKHFV LMLWLA ANT WFLD TYLLY 37  
Tr-Nox4 -----MSVRSWIANEGGKFLV LMLWLG VNTW MFLNTFLLF 35  
Ci-Nox4 -----MQLKNYLVDGLR LFIWVAWIS INASL FYFTFMY 35  
Ag-Nox -----LLWTGFNFV VCKAFS NY 18  
Pa-NoxA -----MGGLVPLLKKQLTGS --KILFHILFWTFHWGIFAYGWWKQ 37  
Mg-NoxA -----MSVGEFLAKQLTAQ --KLFFNISFWG FHI GIFAYGWYKQ 36  
Fg-NoxA -----MGSQLGFVELIKKQF VPG--KLLYHFLFWTFHWGIFAYGWWKQ 40  
An-NoxA -----MGRYPLKSYFAPS --KLFFYTWFWGAHIAIFAYGWYHQ 35  
Pa-NoxB RWTPLTRMLLSGEMTQERQKELTPREKFDKWMVNEGYRRIFVVFVFMFLHAILFAFSFVNF 83  
Fg-NoxB RWTPLTRMLLSGEMTQEKQELSSREKFDKWMVNEGYRRFFVVFVFMILHALIFSACVHY 72  
Mg-NoxB RWTPLTRMLLSGEMTQERQKELTPREKFDKWMVNEGYRRFFVVFVFMILHAMVFAFGVNY 87  
Dd-NoxA -----MRLPTKEEIQRYVWNEGK LILVILYTLGNIAAFVYTFVH 37  
Dd-NoxB -----KNEKIGLRSKIFKSKIFIKIRGWWWHRGISTYIMLFYIALNIGVGVHMFYNM 204  
At-rbohC -----RFFLLDNWQRCWVIVLWFIVMAILF TYKIYQ 373  
At-rbohG -----RFFVLD SWQRVWVIALWLTIMAILFAYKIYQ 325  
At-rbohA -----KYFLFDNWKRVWVWALWIGAMAGLFTWKFMEY 366  
At-rbohB -----SYFFLENWKRIWVLTWISICITLFTWKFLQY 319  
At-rbohD -----KYFILDNWRQLWIMMLWLGICGGLF TYKFIYQ 398  
At-rbohF -----VYIMQENWKRIWVLSLWIMIMIGLFLWKFFQY 409  
At-rbohI -----LYSLQDNWKRIWVLTWVFIWAWLFWMKCYQY 397  
At-rbohE -----VNNWQRSWVLLVWVWMLMAILFVWKFLEY 388  
At-rbohH -----AELMHENWKKLWV LALWAI INVYLFM WKYEEF 338  
At-rbohJ -----AELMYEHWKKI WVVTLWLA VNVVLFM WKYEEF 349  
Hs-Nox5 -----WHNHRSQLFCLATYAGLHVLLFGLAASA 226  
Cf-Nox5 -----WHNHRSHLLCLAAFAGLHLLLFALAASE 225  
Bt-Nox5 -----WHNHRSHVLC LAVFVGLHMLLFALAASA 243  
Md-Nox5 -----WHNCGKLAVLAVYIGLNILFLT LAALK 215  
Xt-Nox5 -----WHNRSKLLFMCCYWCLNVLLFGLAAVN 224  
Tr-Nox5 -----WHNCRKLLFLCMYAFFSLMLFVNAMLQ 151  
Tn-Nox5 -----MLQHRSGAACYMLAKGCGQCLNFNCTFVMVAARAP 35  
Gg-Nox5 -----WHNHRQLAFLGGYVSLNLLFLT LAALR 199  
Ol-Nox5 -----WQNNRKLFLFGYGVNLLLFV VAMLR 238  
Dr-Nox5 -----WHNNSRKLFFLCLYGLLNTFLFIMAMLK 129  
Sp-Nox5A -----VHNRYRKILFLVVFILINVA LFT EAA YR 230  
Sp-Nox5B -----RNHFSV IIFWIVFVMINAGLAAW GAYEG 179

|          |                                                         |      |
|----------|---------------------------------------------------------|------|
| Ag-Nox5  | -----APYIKNNYVYLSFLTIVFTLINVGLFVSRAIQ-                  | 280  |
| Am-Nox5  | -----KPYMKNNYVYIFFISIFILINVSLFVSRLYE-                   | 282  |
| Dm-Nox5  | -----LAYMKNNQVFVTYLFFYITVNLCLFISRAIQ-                   | 285  |
| Dd-NoxC  | -----TEKESFHSKRYLKEGSKLFFISLFFIINSILVITSFLN             | 601  |
| Mg-NoxC  | -----DKYLRDMSTFRVRAYWAVHGPEIAFLGIVVGLQLGLGIWQCH         | 243  |
| Fg-NoxC  | -----KSYIKRRLPGWRRIRSYWAVHGPEIVFLGVVISMQLAFGIWQLV       | 163  |
| Cc-NoxD  | -----MIPRSKPDVARPSARIEAYLSTHAFKVLFFAFYGAAVTLMFAWGFKAEFT | 50   |
| Py-NoxD  | -----MGDDKPPPKSRVSRVESYLSTNGFVLTFLGLYILANVILFFFAATPERR  | 45   |
| Xt-Duox1 | -----YRRHIVCLIFFYGISAGLFAERAYYY                         | 20   |
| Xt-Duox2 | -----YRRHIVCVVIFYGISVGLFLERAYHY                         | 70   |
| Gg-Duox  | -----YRRHIVCVVLSAITAGLFAERAYYY                          | 964  |
| Tr-Duox  | -----YRRHIVCSALVYGMAAGLCLERCYYY                         | 990  |
| Tn-Duox  | -----YRRHIVCFIVVYGITAGLCLERCYYY                         | 1081 |
| Ol-Duox  | -----YRRHIVCFIITYSITVGVTLERCYYY                         | 1067 |
| Dr-Duox  | -----YRRHICTVVIYASAGLALERCYYY                           | 1018 |
| Mm-Duox2 | -----YRRHIVCVTIFSAICIGLFAERAYYY                         | 1032 |
| Rn-Duox2 | -----YRRHIVCVTIFSAICAGLFAERAYYY                         | 1032 |
| Hs-Duox2 | -----YRRHIVCAIFSAICGVFADRAYYY                           | 1063 |
| Cf-Duox2 | -----YRRHIVCVVFSACAGLFAERAYYY                           | 815  |
| Hs-Duox1 | -----YRRHIGCVAVFYAIAGGLFLERAYYY                         | 1066 |
| Cf-Duox1 | -----YRRHIGCVAVFYAITGGLFLERAYYY                         | 1066 |
| Rn-Duox1 | -----YRRHIGCVAVFYITGALFLERAYYY                          | 1062 |
| Mm-Duox1 | -----YRRHIGCVAVFYITGALFLERAYYY                          | 1066 |
| Ci-DuoxA | -----HRLQIFWLTLYLLVLGIFIERAYFY                          | 1092 |
| Ci-DuoxC | -----YANHIFCLSLYSLITAGVFLN-AFFV                         | 957  |
| Ci-DuoxD | -----YALHIFWTSLYIWIITIGVFLW-AFSM                        | 1035 |
| Sp-Duox  | -----NRLQIFYVYVLYLLVLGAVFIERAYYY                        | 1189 |
| Dm-Duox  | -----NRQNIFYLFLFYVVTIVLFVERFIHY                         | 989  |
| Ag-Duox  | -----NRQNIFYLFLFYVITIVLFVERFIHY                         | 990  |
| Am-Duox  | -----NRQNIFYLFFVYVTTIALFVERFIYY                         | 995  |
| Ci-DuoxB | -----YRRHIFCMVIFYGITIALVVERATFY                         | 1010 |
| Ce-Duox1 | -----YRQHVFIVFCFVAINLVLFERFWHY                          | 1009 |
| Ce-Duox2 | -----YRQHVFIFCFVAINIVLFFELFWHS                          | 1015 |

TM (II)

|         |                                                            |             |
|---------|------------------------------------------------------------|-------------|
| Hs-Nox1 | -----EKADKYYYTRKILGSTLACARASALCLNFNSTLILLP-VCRNLLSFLRG---  | TCSFCRST 89 |
| Cf-Nox1 | -----EKADKYYYTREILGSTLAWARASARCLNFNSMLILLP-VCRNLLSFLRG---  | TCSFCRRT 89 |
| Mm-Nox1 | -----EKSDKYYYTREILGTALALARASALCLNFNSMMLIP-VCRNLLSFLRG---   | TCSFCNRT 89 |
| Rn-Nox1 | -----EKSDKYYYTREILGTALALARASALCLNFNSMILIP-VCRNLLSFLRG---   | TCSFCNHT 89 |
| Gg-Nox1 | -----DRDERYFYTRAILGSALAWARASAKCLNFNSMLILLP-VCRNLLSFLRG---  | SFSCCRRT 89 |
| Xt-Nox1 | -----EKGDSYSYTRRELLGSALAWARGSAACLNFNCLLILLP-VCRNLLSFLRG--- | TCTCVQRS 89 |
| Tn-Nox1 | -----DLGDQFFYTRHLLGSALAWARAPAAVLNFCNMLILLP-VCRNLLSLLRG---  | SFVCCGRS 89 |
| Tr-Nox1 | -----DLGERFFYTRHLLGSALAWARAPAAVLNFCNMLILLP-VCRNLLSFLRG---  | SFVCCGRS 89 |
| Ol-Nox1 | -----DRDDDFYTRHLLGSALAWARAPAAVLNFCNMLILLP-VCRNLLSLIRG---   | SFVCCSRT 89 |
| Dr-Nox1 | -----DQGERFEYTRRELLGSALAWARAPAAVLNFCNMLILLP-VCRNLLSLLRG--- | SFVCCGRT 89 |
| Mm-Nox2 | -----DDGPKYNYTRKLLGSALALARAPAAACLNFCNMLILLP-VCRNLLSFLRG--- | SSACCSTR 89 |
| Rn-Nox2 | -----DDEPKYNYTRKLLGSALALARAPAAACLNFCNMLILLP-VCRNLLSFLRG--- | SSACCSTR 89 |
| Hs-Nox2 | -----DIPPKFFYTRKLLGSALALARAPAAACLNFCNMLILLP-VCRNLLSFLRG--- | SSACCSTR 89 |
| Cf-Nox2 | -----NNGEEFFYTRKLLGFALPLARAPAAACLNFCNMLILLP-VCRNLLSFLRG--- | SSACCSTR 89 |
| Gg-Nox2 | -----DLPQNFFYTRVLLGRALALARAPAAACLNFCNMLILLP-VCRNLLSFLRG--- | SSACCSTR 89 |
| Xt-Nox2 | -----DEGEKYFYSRKLYGSALAWARAPAAACLNFNCLLILLP-VCRNLLSFLRG--- | SSACCGRS 89 |
| Tn-Nox2 | -----LVERWFYTRVLLGHALSWARAPAAACLNFCNMLILLP-VCRNLLSFLRG---  | SIQCCSRT 88 |
| Tr-Nox2 | -----LVDRWFYTRVLLGHALSWARAPAAACLNFCNMLILLP-VCRNLLSFLRG---  | SIQCCSRT 88 |

O1-Nox2 -LVERWFYTRVLLGHALSARAPAACLNFNCMLILLP-VCRNLLSFLRG---SIQCCSRT 88  
 Dr-Nox2 -LIDKYYYTRVILGHALSARAPAACLNFNCMLILLP-VCRNLLSFLRG---SIQCCSRT 88  
 Hs-Nox3 EEEESFHYTRVILGSTLAWARASALCLNFNCMLILLP-VSRNLISFIRG---TSTCCRGP 90  
 Cf-Nox3 EEEESFLYTRVILGSTLAWARASAVCLNFNCMLILLP-ISRNLISFMRG---TSTCCRGL 90  
 Mm-Nox3 TEEEAFFYTRVILGSALAWARASAVCLNFNCMLILLP-VSRNFISLVRG---TSVCCRGP 90  
 Rn-Nox3 AEEESFFYTRVILGSALAWARASAVCLNFNCMLILLP-VSRNFVSLVRG---TSVCCRGP 90  
 Gg-Nox3 EDEDAYVYTRIMLGSTLAWARASATCLNFNCMLILLP-VSRNLISFLRG---ASACCGGA 89  
 Ci-Nox2 NTKKTFYTRVLLGPALALARAPAACLNLNCLLVLLP-VCRNLLSLFRK---ACMCCPRR 93  
 Sp-Nox2A EQGQYFYIRRTIGVGLSIAKAAGAALNLSMIILLP-ICRNLISFFRGCATNTLCRRS 92  
 Sp-Nox2B MDNANYIYTKYLMKNGLPVARASACLNFNSMLILFP-VCRNMISYLRGSCSTKFSRRN 77  
 Mm-Nox4 NQGPEYYYIHQMLGLGLC--RASASVNLNCSLILLP-MCRTVLAYLRGS--QKVPS-RR 93  
 Rn-Nox4 NQGPEYYYIHQMLGLGLCCLSRASVNLNCSLILLP-MCRTVLAYLRGS--QKVPS-RR 93  
 Hs-Nox4 NQGPEYHYLHQMLGLGLCCLSRASVNLNCSLILLP-MCRTLLAYLRGS--QKVPS-RR 93  
 Cf-Nox4 NQGPEYHYLHQMLGLGLCCLSRASVNLNCSLILLP-MCRTLLAYLRGS--QKVPS-RR 97  
 Gg-Nox4 ---PSYLTLPVVFQGLGCVSRASVNLNCSLILLP-MCRILLAFLRGS--QKVAS-RK 53  
 Xt-Nox4 YSGPQYFYLHQMLGLGLCCLSRASVNLNCSLILLP-MCRTVIGLLRGP--KMNVIHWK 94  
 O1-Nox4 STGQYHYLYQMLGLGLCISRASVNLNCSLILLP-MCRSLLTFIRGS--HTMST-RR 93  
 Tr-Nox4 SSGEQYHYLYQMLGLGLCISRASVNLNCSLILLP-MCRSLLKFIRGT--HTVSS-RK 91  
 Ci-Nox4 YNGIQFYHLHQMLGVLGCLISRAAACLNLNCSLILLP-MCRGLVTFMRGL--PRGVG-RQ 91  
 Ag-Nox HHDEVYYYLSRILGNGLCVSRGTAPVNLVNTMALITLP-TCKTFNLLLHKL--FGRCSRTL 75  
 Pa-NoxA AADARLAG-LNTLQYSVWLSRAGLVLSVDGMLILLP-VCRTIMRFIR-----PKI 87  
 Mg-NoxA FSDPRLAG-LNTLTFVWISRGAGLVLSVDGMLILLP-VCRTIMRWIR-----PKI 86  
 Fg-NoxA AVDPRLAG-LNTLKFVWISRGAGLVLSVDCMLILLP-VCRTVMRWIR-----PKI 90  
 An-NoxA AKSEPLSP-LNVLYSVWISRGAGLVLTVDGTLILLP-MCRNLVRFIR-----PKL 85  
 Pa-NoxB AVKENLQIARDTFGPTFMIAARSAALVHVDVALILFP-VCRTLISMARQ-----TPLN 135  
 Fg-NoxB AKESLETSRQTFGPTFMIAARSAALVHVDVAIILFP-VCRTLISLLRQ-----TPLN 124  
 Mg-NoxB AVKDNLQRARDTFGPTFMIAARSAALVHFDVALILFP-VCRTFISLARQ-----TPLN 139  
 Dd-NoxA YYNSP---AFEVVGYGVCFARGCAQLKLNLCALILVP-VLRNLLSFLRG-----TFLN 89  
 Dd-NoxB YHSD---IFKFLGLSFCFSRTAARLNLNSAVILLP-VLRNFLSWLRG-----TIVN 256  
 At-rbohC RRSVPYVPMGDCVC---MAKGAETVKNMALILLP-VCRNTITWLRN----KTRLG- 422  
 At-rbohG KNRAVYEVLPVCVC---LAKGAETLKNMALILLP-VCRNTITWLRN----KTRLG- 374  
 At-rbohA RKRSAYEVMGVCVC---IAKGAETLKNMAMILLP-VCRNTITWLRN----KTKLS- 415  
 At-rbohB KRKTVEVMGYCVT---VAKGSAETLKNMALILLP-VCRNTITWLRN----KSKLIG 369  
 At-rbohD KNKAAVGMGYCVC---VAKGGAETLKNMALILLP-VCRNTITWLRN----KTKLG- 447  
 At-rbohF KQKDAFHVMGYCLL---TAKGAAETLKNMALILFP-VCRNTITWLRN----STRLS- 457  
 At-rbohI KHKDAFHVMGYCLV---MAKGAETLKNMALILLP-VCRNTITYLRN----STALS- 445  
 At-rbohE REKAAFKVMGYCLT---TAKGAAETLKNMALVLLP-VCRNTITWLRN----STRAR- 436  
 At-rbohH MRNPLYNITGRVCVC---AAKGAETLKNMALILVP-VCRKTLTILR-----STFLN- 386  
 At-rbohJ TTSPLYNITGRCLC---AAKGTAELKNMALILVP-VLRRTLTFLR-----STFLN- 397  
 Hs-Nox5 ---HRD-LGASVM---VAKGCGQCLNFDSCFIAVL-MLRRCLTWLRA-----TWLA- 275  
 Cf-Nox5 ---HRA-RGASVM---VAKGCGQCLNLDGCFIAVL-MLRRCLTWLRA-----TWLA- 301  
 Bt-Nox5 ---YRA-FGSSVM---VAKGCGQCLNFDSCFIAVL-MLRRCLTWLRA-----TWLA- 309  
 Md-Nox5 ---YQS-SGTRIM---IARGGQCLNFNCSFIVVL-MLRRCLTWLRA-----TWLA- 281  
 Xt-Nox5 ---HAS-LGGWIM---VAKGCGQCLNFNCTFIVVM-MLRRCLTWLRT-----TCVV- 290  
 Tr-Nox5 ---HSY-GGGWYM---VAKGCGQCLNFNCTFIMVL-MLRRCLTWLRA-----TWVV- 217  
 Tn-Nox5 AGRGLEPRVKRASP-----TCVQVL-MLRRCLTWLRA-----TWVV- 70  
 Gg-Nox5 ---HFG-GSGWVA---AARGCGQCLNFNCPFIAMPMLRACTRLRA-----TPAG- 266  
 O1-Nox5 ---HSD-GGVWLM---VARGCGQCLNFNCTFIVVL-MLRRCLTWLRA-----TWVVR- 287  
 Dr-Nox5 ---HAD-GGLWIM---LARGCGQCLNLCNCTFVMVL-MLRRCLTWLRA-----TWVVR- 173  
 Sp-Nox5A ---YAKKSNWCLI---TARGCGQCLNFNSAFVVL-MLRKTITLRT-----TKAAE- 279  
 Sp-Nox5B YQSVSDERHPAAIS---IARSAGRCLSFECFVVL-MLRKLITLRLN-----TFLMS- 244  
 Ag-Nox5 ---YRN--SNGFVI---MARACGQCLNFNCAFILVL-MLRQCITFLRT-----RGFTA- 329  
 Am-Nox5 ---YRK--SNGYVM---LARACGQCLNFNCSFIVVL-MLRQCITFLRT-----HGFNS- 331  
 Dm-Nox5 ---YRA--SNGFVI---IARACGQCLNFNCAWVVL-MLRHSLTYLRG-----RGLSS- 334  
 Dd-NoxC VHANN-KRAIELFGPGVYITRIAAQLIEFNAAIILMT-MCKQLFTMIRN-----TKFK 653

|          |                                                              |      |
|----------|--------------------------------------------------------------|------|
| Mg-NoxC  | KYAS-GEQYQAAFQGWGVALAKLCAGALYPTFFFLILS-MSRYFSTFLRR-----SYHLS | 296  |
| Fg-NoxC  | KYQT-TPGYRAAFQGWVMAKTCAGALYPTFFFLILS-MSRYFSTWLRR-----SYHIS   | 221  |
| Cc-NoxD  | FEDNFDMPHFNTVRWFVIGIARGMGYTLNLTAFVILL-ASRLLFKLRD-----SPLQL   | 103  |
| Py-NoxD  | LWP---VGHYR--RNLTVPARGAGNLIINFNSAVILLV-SARKFMSWLRT-----PLNM  | 98   |
| Xt-Duox1 | GFASPSSGIADATFIGLIISRGSAASISFMFSYMLLT-MCRNLITLLRET-----FLN   | 1072 |
| Xt-Duox2 | AFESQHRGISEVTMPGIIISRGTAASISFMFSYILLT-MCRNLITFLRET-----FLN   | 1122 |
| Gg-Duox  | AFASPSTGIAQTTFVGGIIISRGSAACISFMFSYILLT-MCRNLITVLRET-----FLN  | 1016 |
| Tr-Duox  | GFQAEESTGLPETSIVGVAFARGSAAAVSFLFPYMLLT-VCRNLITLCRET-----FLN  | 1042 |
| Tn-Duox  | GFQAEESTGLPETSIVGVAFARGSAAAVSFLFPYMLLT-VCRNLITLCRET-----FLN  | 1133 |
| O1-Duox  | GLQAEATGVPGTTVVGGIIVARGSAAGVSFLFPYMLLT-VCRNLITLCRET-----FLN  | 1119 |
| Dr-Duox  | GLQAHSSGIPETSMVDVLSVRSAAAISFLFPYMLLT-VCRNLITMCRET-----FLN    | 1070 |
| Mm-Duox2 | GFASPPTDIEETTYVGIILSRGTAASISFMFSYILLT-MCRNLITFLRET-----FLN   | 1084 |
| Rn-Duox2 | GFASPPTDIEETTYVGIILSRGTAASISFMFSYILLT-MCRNLITFLRET-----FLN   | 1084 |
| Hs-Duox2 | GFASPPSDIAQTTLVGIILSRGTAASVSMFSYILLT-MCRNLITFLRET-----FLN    | 1115 |
| Cf-Duox2 | AFASPPSGIAETTFVGIILSRGTAASISFMFSYILLT-MCRNLITFLRET-----FLN   | 867  |
| Hs-Duox1 | AFAAHHTGITDTRVGIILSRGTAASISFMFSYILLT-MCRNLITFLRET-----FLN    | 1118 |
| Cf-Duox1 | AFGAHMGITDTRVGIILSRGTAASISFMFSYILLT-MCRNLITFLRET-----FLN     | 1118 |
| Rn-Duox1 | AFAAHHSGITDTRVGIILSRGTAASISFMFSYILLT-MCRNLITFLRET-----FLN    | 1114 |
| Mm-Duox1 | AFAAHHSGITDTRVGIILSRGTAASISFMFSYILLT-MCRNLITFLRET-----FLN    | 1118 |
| Ci-DuoxA | SVEREFAGLRRRAGYGVSIIRGSAASAMMFTYTSLLVT-MCRNTITALRET-----FLH  | 1144 |
| Ci-DuoxC | VYSKYATGLYIGGPLMALARASAAALMFNFSTLLT-MCRNLITFLRET-----FLH     | 1009 |
| Ci-DuoxD | TIFNKAAGLGVIAGNALPLARASAAALMFNISTLLT-MCKNILTSLRET-----QLH    | 1087 |
| Sp-Duox  | SVEREFAGLRRRAGFGVSVTRGSAASAMMFTYSSLLVT-MCRNTITKLRET-----FLH  | 1241 |
| Dm-Duox  | SFMAEHTDLRHIMGVGIATRGAASLSFCYSLLLT-MSRNLITKLKEF-----PIQ      | 1041 |
| Ag-Duox  | SFMAEHTDLRHIMGVGIATRGAASLSFCYSLLLT-MSRNLITKLKEF-----PIQ      | 1042 |
| Am-Duox  | SFMAEHTDLRHIMGVGIATRGAASLSFCYSLLLT-MSRNLITKLKEF-----SIQ      | 1047 |
| Ci-DuoxB | AFGAEHGIRRVTEWGIISRSAAAISFHFSYILLT-MSRNLITCRET-----FLK       | 1062 |
| Ce-Duox1 | RYMAENRDLRRVMGAGIAITRGAAGALSFCMALILLT-VCRNLITLLRET-----VIA   | 1061 |
| Ce-Duox2 | RYLNEDRDLRRVMGAGIAITLSSAGALSFCMALILLT-VCRNLITLLRET-----VIA   | 1067 |

\* \* \* \*

TM (III)

|         |                                            |     |
|---------|--------------------------------------------|-----|
| Hs-Nox1 | LRKQLD-HNLTfHKLVA-YMICLHT-----AIHIIAHLFNF- | 123 |
| Cf-Nox1 | LRKQLD-HNLTfHKLVA-YMICLHT-----AIHIIAHLFNF- | 123 |
| Mm-Nox1 | LRKPLD-HNLTfHKLVA-YMICIFT-----VIHIIAHLFNF- | 123 |
| Rn-Nox1 | LRKPLD-HNLTfHKLVA-YMICIFT-----AIHIIAHLFNF- | 123 |
| Gg-Nox1 | LRKQLD-HNLTfHKLVA-YALALLT-----AVHTIAHLFNL- | 123 |
| Xt-Nox1 | MRKQLD-NNLAFHKLVG-YTIALMT-----AIHTIAHLFNV- | 123 |
| Tn-Nox1 | MRKQLD-KNLSFHKLVA-YMIALMT-----AVHTVAHLLNV- | 123 |
| Tr-Nox1 | MRKQLD-KNLSFHKLVA-YMIALMT-----AVHMAHLLNV-  | 123 |
| O1-Nox1 | MRKQLD-KNLSFHKLVA-YMIALMT-----AVHTVAHLLNL- | 123 |
| Dr-Nox1 | VRKQLD-KNLTfHKLVA-YMIALMT-----AVHTIAHLFNA- | 123 |
| Mm-Nox2 | IRRQLD-RNLTfHKMVA-WMIALHT-----AIHTIAHLFNV- | 123 |
| Rn-Nox2 | IRRQLD-RNLTfHKMVA-WMIALHT-----AIHTIAHLFNV- | 123 |
| Hs-Nox2 | VRRQLD-RNLTfHKMVA-WMIALHS-----AIHTIAHLFNV- | 123 |
| Cf-Nox2 | IRRQLD-RNLTfHKLVA-WMIALHT-----AIHTIAHLFNV- | 123 |
| Gg-Nox2 | VRRQLD-RNLTfHKMVA-WMIALHT-----AIHTIAHLFNV- | 123 |
| Xt-Nox2 | LRRQLD-RNLTfHKMVA-WMIALHT-----AIHTGAHLFNV- | 123 |
| Tn-Nox2 | AARQLD-RNLTfHKLVA-YMIAFHT-----AVHIVAHLFNF- | 122 |
| Tr-Nox2 | AARQLD-RNLTfHKLVA-YMIAFHT-----AVHIVAHLFNF- | 122 |
| O1-Nox2 | AARQLD-RNLTfHKLVA-YMIAFHT-----AVHIIAHLFNF- | 122 |
| Dr-Nox2 | AARQLD-RNLTfHKLVA-YMIAFHT-----AVHIIAHLFNF- | 122 |
| Hs-Nox3 | WRRQLD-KNLRfHKLVA-YGIAVNA-----TIHIVAHFNL-  | 124 |
| Cf-Nox3 | WRRQLD-KNLRfHKLVA-YGIAVNA-----TIHIVAHLCNL- | 124 |

|          |                                            |     |
|----------|--------------------------------------------|-----|
| Mm-Nox3  | WRRQLD-KNLNFHKLVA-YGIAVNS-----VIHVAHLFNL-  | 124 |
| Rn-Nox3  | WRRQLD-KNLKFHKLVA-YGIAVNS-----VIHVAHLFNL-  | 124 |
| Gg-Nox3  | PRRQLD-KNIAFHKVVA-YGIAVNA-----TIHVAHLINI-  | 123 |
| Ci-Nox2  | IRRVLD-KNIKFHMCMA-YMIVLMT-----LIHYFAHCFNV- | 127 |
| Sp-Nox2A | VRRQLD-KNLFHKTVA-YMIVVWT-----IVHVVAHAFNF-  | 126 |
| Sp-Nox2B | LRRQLD-KNITFHKLIA-YAIGFFV-----ILHVGAHCFNL- | 111 |
| Mm-Nox4  | TRRLD-KSKTLHITCG-VTICIFS-----GVHVAHLVNA-   | 127 |
| Rn-Nox4  | TRRLD-KSKTLHITCG-ITICIFS-----GVHVAHLVNA-   | 127 |
| Hs-Nox4  | TRRLD-KSRTFHITCG-VTICIFS-----GVHVAHLVNA-   | 127 |
| Cf-Nox4  | TRRLD-KSRTFHITCG-VTICIFS-----GVHVAHLVNA-   | 131 |
| Gg-Nox4  | TRRLD-KSKTFHVTG-VTVCIFS-----VLHVAHLVNA-    | 87  |
| Xt-Nox4  | TRRMLD-KHKTFFAACG-LAICLFS-----AHLVNA-----  | 123 |
| Ol-Nox4  | MRRLLD-KSKSFHVACG-IAICIFS-----AVHVAHLINV-  | 127 |
| Tr-Nox4  | TRRMLD-KYKTFHVACG-LAICIFS-----AIHVAHLANA-  | 125 |
| Ci-Nox4  | VRRLLD-RGRSFHILCG-YILCLLA-----GVHCAAHAYNA- | 125 |
| Ag-Nox   | LVHYLE-KTKVLHLILG-CSLLIVA-----IVHVAHFVNI-  | 109 |
| Pa-NoxA  | KFIPLD-ENIWMHRQLA-YSMLLFT-----IHTAAHYVNF-  | 121 |
| Mg-NoxA  | RFIPLD-ENIWFHRQIA-YAMLIFS-----ITHTAAHYVNF- | 120 |
| Fg-NoxA  | RFLPLD-ENLWMHRQLA-YSMLLFT-----CLHTGAHYVNF- | 124 |
| An-NoxA  | RWLPLD-ENIWFHRQVA-YATLVFT-----ILHVAAHYVNF- | 119 |
| Pa-NoxB  | GIIQFD-KNITFHITTA-WSIVFWS-----WVHTIAHWNNF- | 169 |
| Fg-NoxB  | GILQFD-KNITFHIVTA-WSIVFWS-----WVHTIAHWNNF- | 158 |
| Mg-NoxB  | GIIQFD-KNITFHITTA-WSIVFFS-----WVHTVAHWNNF- | 173 |
| Dd-NoxA  | NYVPFD-KNIVFHKLIA-WVICFAT-----FGHVAHFVNF-  | 123 |
| Dd-NoxB  | NYIPID-KHLNFHKLCA-FMLFCCT-----IHCVGHYISF-  | 290 |
| At-rbohC | RVVPFD-DNLNFHKVIA-VGIIVGV-----TMHAGAHLACD- | 456 |
| At-rbohG | VFVPFD-DNLNFHKVIA-VGIAIGV-----AIHVSHLACD-  | 408 |
| At-rbohA | AIVPFD-DSLNFHKVIA-IGISVGV-----GIHATSHLACD- | 449 |
| At-rbohB | SVVPFD-DNINFHKVVA-FGIAVGI-----GLHAISHLACD- | 403 |
| At-rbohD | TVVPFD-DSLNFHKVIA-SGIVVGV-----LLHAGAHLTCD- | 481 |
| At-rbohF | YFVPFD-DNINFHKTIA-GAIVVAV-----ILHIGDHLACD- | 491 |
| At-rbohI | HSVFPD-DCINFHKTIS-VAIISAM-----LLHATSHLACD- | 479 |
| At-rbohE | ACVPFD-DNINFHKIIA-CAIATGI-----LVHAGTHLACD- | 470 |
| At-rbohH | RVVPFD-DNINFHKVIA-YMIAFQA-----LLHTALHIFCN- | 420 |
| At-rbohJ | HLIPFD-DNINFHKLIA-VAIAVIS-----LLHTALHMLCN- | 431 |
| Hs-Nox5  | QVLPLD-QNIQFHQLMG-YVVVGLS-----LVHTVAHTVN-- | 307 |
| Cf-Nox5  | QVLPLD-QNIQFHQFVG-YVIVVLS-----LVHTVAHIVNF- | 335 |
| Bt-Nox5  | QVLPLD-HNIQFHQLMG-YVVVGLS-----LVHTVAHVNF-  | 343 |
| Md-Nox5  | RVLPLD-QNVEFHQLIG-YVVVGFV-----FLHTTAHVNF-  | 315 |
| Xt-Nox5  | RFLPLD-QNVVHLELIG-YVIFVLT-----VIHTAAHVTFN- | 324 |
| Tr-Nox5  | RVLPLD-QNILLHQIVG-YAILFYT-----LLHTSAHIFNF- | 251 |
| Tn-Nox5  | RVLPLD-QNILLHQIVG-YAILFYT-----LLHTCAHVNFNG | 105 |
| Gg-Nox5  | RALPLE-HCVLHQVPG-SAVLALA-----VLHAGAHVANYG  | 301 |
| Ol-Nox5  | -VLPLD-QNILLHQIVG-YAIFCFV-----LGHAIAHVVN-- | 319 |
| Dr-Nox5  | -VLPLD-QNILLHQIVG-YAILIFS-----VGHTGAHIMN-- | 205 |
| Sp-Nox5A | -ILPTD-QNIVFHKLVG-IFIALLS-----GIHTLGHIGNAW | 313 |
| Sp-Nox5B | -VLPLD-QHVVIHKIVA-VFIIILS-----VIHTAGHIANIG | 278 |
| Ag-Nox5  | -FLPLD-QHIYHLKLTG-VLVAIFS-----LVHTIMHLNFNT | 363 |
| Am-Nox5  | -VLPLD-QHIYHLKVTG-GLICVFS-----IAHTLMHLLNFG | 365 |
| Dm-Nox5  | -YLPLD-HHVYLHKLGT-ITISVLS-----LIHTIMHLNFNS | 368 |
| Dd-NoxC  | FLFPVD-KYMTFHKLIG-YTLIIAS-----FLHTIGWIVGM- | 687 |
| Mg-NoxC  | RFINWD-LSQEFHIKIS-IVALVLA-----SLHALGHLSG-- | 329 |
| Fg-NoxC  | RFFNWD-LSQEFHIRIS-CVAILLA-----TLHATIGLGT-- | 254 |
| Cc-NoxD  | -VLPDAAFPALHIVVGY-----TIFFAVLVHGSFHFVWLI   | 138 |
| Py-NoxD  | -VVPFDKAMPAFHMLVGR-----VFLAASVVHVGPHLPVYV  | 133 |

|          |                                                               |               |      |
|----------|---------------------------------------------------------------|---------------|------|
| Xt-Duox1 | QYIPFD-SAVDFHRLIA-VTALVLS-----                                | ILHSLGHLVNVY  | 1107 |
| Xt-Duox2 | QYIPFD-AAVDFHRLVA-KTAIIILT-----                               | EFKLLFSHQTDIK | 1158 |
| Gg-Duox  | RYIPFD-AAVDFHRWIA-MAALIFS-----                                | VLHTAGHLVNVY  | 1051 |
| Tr-Duox  | RYIPFD-AAIDFHRFMA-MAAIVLS-----                                | VVHTLAHVVNIY  | 1077 |
| Tn-Duox  | RYVFPD-AAIDFHRLEMA-MTAIVLAGWRSRYEGTHLRARKLTAASPPPVVHTLAHVVNIY |               | 1191 |
| O1-Duox  | RFIPFD-AAIDFHRSLA-MTAVVLS-----                                | VAHSLAHVVNIY  | 1154 |
| Dr-Duox  | RYIPFD-AAIDLHRQMA-ATALILS-----                                | VVHSLGHLVNVY  | 1105 |
| Mm-Duox2 | RYIPFD-AAVDFHRWIA-MAAVVLA-----                                | VLHSAHGVNVY   | 1119 |
| Rn-Duox2 | RYIPFD-AAVDFHRWIA-MAAVVLA-----                                | VVHSLGHLVNVY  | 1119 |
| Hs-Duox2 | RYVFPD-AAVDFHRWIA-MAAVVLA-----                                | ILHSAHGVNVY   | 1150 |
| Cf-Duox2 | RYVFPD-AAVDFHRWIA-MAAVVLA-----                                | ILHSAHGVNVF   | 902  |
| Hs-Duox1 | RYVFPD-AAVDFHRLIASTAIIPVA-----                                | VLHSGHVNVY    | 1153 |
| Cf-Duox1 | RYVFPD-AAVDFHRLIASTAIIVLTG-----                               | RALDAGHVNVY   | 1154 |
| Rn-Duox1 | RYIPFD-AAVDFHRFIASIAIILT-----                                 | VLHSAHGVNVY   | 1149 |
| Mm-Duox1 | RYIPFD-AAVDFHRLIASTAIILT-----                                 | VLHSAHGVNVY   | 1153 |
| Ci-DuoxA | LYIPFD-SAITMHRIIAWLALFFTG-----                                | MHIIGHSLNIY   | 1179 |
| Ci-DuoxC | RFIPFD-SAVTMHRIVAWMALAFTA-----                                | LHILAHGINFY   | 1044 |
| Ci-DuoxD | LYIPFD-AAVAFHKLVAWMALFFTA-----                                | LHIIAHGINFY   | 1122 |
| Sp-Duox  | RYVFPD-SALNMHKLIAMLALFFSI-----                                | MHTIGHGINFY   | 1276 |
| Dm-Duox  | QYIPLD-SHIQFHKIAACTALFFSV-----                                | LHTVGHIVNFY   | 1076 |
| Ag-Duox  | QYIPLD-SHIQFHKIAACTALFFSL-----                                | LHTVGHIVNFY   | 1077 |
| Am-Duox  | QYIPLD-SHIQFHKIAACTALFFSV-----                                | LHTVGHMVNFY   | 1082 |
| Ci-DuoxB | NFIPFD-SAVAFHKIAYVALVETI-----                                 | FHVLGHASNFY   | 1097 |
| Ce-Duox1 | QYIPFD-SAIAFHKIVALFAAFWAT-----                                | LHTVGHCVNFY   | 1096 |
| Ce-Duox2 | QYIPFD-SAIAFHKIVALFTLFWST-----                                | LHTIGHCVNFY   | 1102 |
|          | **      *                                                     | *   *         |      |

|         |                                             |                      |     |
|---------|---------------------------------------------|----------------------|-----|
| Hs-Nox1 | -----DCYSRSRQA-----                         | TDGSLASILSSLSHDEKKG  | 151 |
| Cf-Nox1 | -----ERYRSRQA-----                          | TDGSLASILSTLSHQGKEE  | 151 |
| Mm-Nox1 | -----ERYRSRQA-----                          | MDGSLASVSSLSHPEKE-   | 150 |
| Rn-Nox1 | -----ERYRSRQA-----                          | MDGSLASVSSLFHPEKE-   | 150 |
| Gg-Nox1 | -----ERYNHSQA-----                          | NDGSLHAVLSKMHLDQSN-  | 150 |
| Xt-Nox1 | -----ERYCDAQK-----                          | KDTPGELSSIG---ED     | 147 |
| Tn-Nox1 | -----EWYNSRQG-----                          | VYDELSTALSKLDDAN--G  | 149 |
| Tr-Nox1 | -----EWYNSRQG-----                          | VYDKLSTALSNELETK--N  | 149 |
| O1-Nox1 | -----EWNNSKLG-----                          | VYGKLSTALSNELEDEG--N | 149 |
| Dr-Nox1 | -----ERYSNSLEG-----                         | EDGLAFELSLLDSSSELN   | 151 |
| Mm-Nox2 | -----EWCVNARVG-----                         | ISDRYSIALSDIGDNE--N  | 149 |
| Rn-Nox2 | -----EWCVNARVG-----                         | TSDPYSVALSNIGDKE--N  | 149 |
| Hs-Nox2 | -----EWCVNARVN-----                         | NSDPYSVALSELGDRQ--N  | 149 |
| Cf-Nox2 | -----EWCVNARVN-----                         | NSDVYSIALSNLGDNP--G  | 149 |
| Gg-Nox2 | -----EWSVHARVE-----                         | EEGTLAAVLSRLGDSNP--N | 149 |
| Xt-Nox2 | -----ERLVDARVE-----                         | ANGTIQAALTDLGDRE--G  | 149 |
| Tn-Nox2 | -----EFFMDAQLNR-----                        | NSSYLPFILSEIGTGD--N  | 149 |
| Tr-Nox2 | -----EFFMDAQLNR-----                        | NSSYLPFILSEIGTGD--N  | 149 |
| O1-Nox2 | -----EYFMDAQLNR-----                        | NHSHLPFILSEIGNDE--N  | 149 |
| Dr-Nox2 | -----ERFMDSQLMI-----                        | NSSHLPYVLSQIGNND--N  | 149 |
| Hs-Nox3 | -----ERYHWSQSE-----                         | EAQGLLAALSCLGNTP--N  | 150 |
| Cf-Nox3 | -----QRYHWSQSA-----                         | EVQGLPATLSKLGNAF--N  | 150 |
| Mm-Nox3 | -----ERYHLGQAK-----                         | DAEGLLAALSCLGDAP--N  | 150 |
| Rn-Nox3 | -----ERYHLGQAK-----                         | DAEGLLAALSCLGNAP--N  | 150 |
| Gg-Nox3 | -----ERYHNSQSK-----                         | EAGGLQNKLSGLGKRP--N  | 149 |
| Ci-Nox2 | -----DFFTSAYQSKILATDTPAIIQKKLIAKLIQIGNNG--N |                      | 164 |

|          |                                                         |      |
|----------|---------------------------------------------------------|------|
| Sp-Nox2A | -----RNLYNHRCVTT-----DNDELCEGISATGRKFKAK                | 157  |
| Sp-Nox2B | -----QNLYNG-RKATS-----EDDWLANRLSQP--SFDLN               | 139  |
| Mm-Nox4  | -----LNFSVNYSED-----FLELNAARYQNEDPR---                  | 152  |
| Rn-Nox4  | -----LNFSVNYSEH-----FLALNAARYQNEDPR---                  | 152  |
| Hs-Nox4  | -----LNFSVNYSED-----FVELNAARYRDEDPR---                  | 152  |
| Cf-Nox4  | -----LNFSVNYNED-----FTELNAARYRDEDPR---                  | 156  |
| Gg-Nox4  | -----LNFSENYNED-----FLAINAANYRGEDPR---                  | 112  |
| Xt-Nox4  | -----VNFSVNYNHE-----FPSINVARYKN-----                    | 144  |
| O1-Nox4  | -----VNFSAGFSED-----FPALNLARYKGEDPK---                  | 152  |
| Tr-Nox4  | -----ANFSTSYSEE-----FPSLNVARYRGEDPK---                  | 150  |
| Ci-Nox4  | -----VYFSKYNSR-----YKDLNVAKYSNQNPL---                   | 150  |
| Ag-Nox   | -----VNFIDNYDER-----YREINWANGPDDNVL---                  | 134  |
| Pa-NoxA  | -----YNVEKTQ-----IRPVTAVQIHVYQP---                      | 142  |
| Mg-NoxA  | -----FNVERLQ-----IRAQTAVQIHYAQP---                      | 141  |
| Fg-NoxA  | -----YNVEITQ-----IRPVTALQIHYAQP---                      | 145  |
| An-NoxA  | -----YNIERKQ-----LRPETALQIHYAQP---                      | 140  |
| Pa-NoxB  | -----AQVAAKNN-----LGIYGWLLANFVSG----                    | 191  |
| Fg-NoxB  | -----AQVAIKYN-----LGIYGWLLANFVSG----                    | 180  |
| Mg-NoxB  | -----AQIAAQQK-----LGIYGWLLANFVSG----                    | 195  |
| Dd-NoxA  | -----R-LYQDITPQEYK-----RILGIDYPNLTPIKYA---              | 151  |
| Dd-NoxB  | -----KKINDDVLKIDDG-----KSVAGDYLINININFPDEK              | 322  |
| At-rbohC | -----FPRLHATPEAYR-----PLRQFFGDEQPKSYWH--                | 485  |
| At-rbohG | -----FPLLIAATPAEYM-----PLGKFFGEEQPKRYLH--               | 437  |
| At-rbohA | -----FPRLIAADEDQYE-----PMEKYFG-PQTKRYLD--               | 477  |
| At-rbohB | -----FPRLHAKNVEFE-----PMKKFFGDERPENYGW--                | 432  |
| At-rbohD | -----FPRLIAADEDTYE-----PMEKYFGDQ-PTSYWW--               | 509  |
| At-rbohF | -----FPRIVRATEYDYN-----RYLFHYFQTKQPTYFD--               | 520  |
| At-rbohI | -----FPRLASTDTDYK-----RYLVKYFGVTRPTYFG--                | 508  |
| At-rbohE | -----FPRIINSSPEQFV-----LIASAFN-GTKPTFKD--               | 498  |
| At-rbohH | -----YPRLSSCSYDVFL-----TYAGAALGNTQPSYLG--               | 449  |
| At-rbohJ | -----YPRLSSCPYNFYS-----DYAGNLLGAKQPTYLG--               | 460  |
| Hs-Nox5  | -----FVLQAQAEASP-----FQFWELLLTTRPG-IG--                 | 333  |
| Cf-Nox5  | -----ALQAQAEAS-----PFQFWELLLTTRPG-IG--                  | 360  |
| Bt-Nox5  | -----ALQAQSETS-----PFRFWELLLTTRPG-IG--                  | 368  |
| Md-Nox5  | -----AQLAQSENS-----TFQFWEYLLTTRPG-IG--                  | 340  |
| Xt-Nox5  | -----TLINLTEKTG-----AYTFWEYLLTTRPG-IG--                 | 350  |
| Tr-Nox5  | -----VQLSESS-----GFTLWEYLLTTRPG-IG--                    | 274  |
| Tn-Nox5  | TPHTHARTVFPDAEGTCACFPALQRTSESS-----GFTLWEYLVTTTRPG-IG-- | 152  |
| Gg-Nox5  | -----RLAQDGHG-----ALSEFLLVARPG-GG--                     | 323  |
| O1-Nox5  | -----FDLTSTNLSQHSE-----FLLWEYLLTTRPM-IG--               | 347  |
| Dr-Nox5  | -----FARLSQNDGAYQ-----LWEYLFTIRPG-IG--                  | 230  |
| Sp-Nox5A | -----FVEKTTDGNVTMS-----ALLFTNPHLTSLG-LA--               | 341  |
| Sp-Nox5B | -----LIYQVENVNGTTA-----AWILDVLRPFPG-LG--                | 306  |
| Ag-Nox5  | -----TIIVYDPVNLANN-----YTTAEWLFTARPGLFG--               | 392  |
| Am-Nox5  | -----TIIVYDEILNHN-----YTLSEWLLTSRPFALFG--               | 394  |
| Dm-Nox5  | -----IIVINDPNINAGH-----YTIGEWLLTDRPGLFG--               | 397  |
| Dd-NoxC  | -----AVATGKPD-----NIFYDCLAPHFKFRPTVW                    | 713  |
| Mg-NoxC  | -----TFNWGSRPER-----QDAVGVLGEGDQVPRP--                  | 355  |
| Fg-NoxC  | -----SFVHGSDPAN-----EDAVAEALGPDKVPRP--                  | 280  |
| Cc-NoxD  | -----TWDAWTWG-----                                      | 146  |
| Py-NoxD  | -----VSKPWGPG-----                                      | 141  |
| Xt-Duox1 | -----IFTIIPLS-----VLSCLFPTVFVDDGSDHPNK                  | 1135 |
| Xt-Duox2 | -----LMIVFTLRL-----CMSCYFLQATYSNDNVLSLN                 | 1187 |
| Gg-Duox  | -----IFSVTPLS-----VLSCLFSSVFMNDGP-----                  | 1074 |
| Tr-Duox  | -----IFSLSDLS-----ILSCLFPKVFRRNNGSERPMK                 | 1105 |



|          |                       |                       |      |
|----------|-----------------------|-----------------------|------|
| Tn-Duox  | -----IFSMSDLS-----    | ILACLFPKVFLNNGSELPMK  | 1219 |
| O1-Duox  | -----IFSISDLS-----    | ILSCLFPKVLNNGSELPPK   | 1182 |
| Dr-Duox  | -----IFCISDLS-----    | ILACLFPKVFVNNGSELPMK  | 1133 |
| Mm-Duox2 | -----IFSVSPLSLMA----- | CVFPNVFVNDGSKFPPKYY-- | 1149 |
| Rn-Duox2 | -----IFSVSPLSLMT----- | CVFPNVFVNDGSKLPPKYY-- | 1149 |
| Hs-Duox2 | -----IFSVSPLSLLA----- | CIFPNVFNNDGSKLPQKFY-- | 1180 |
| Cf-Duox2 | -----IFSVSPLSLLA----- | CIFPNIFMNDGSQLPQKFY-- | 932  |
| Hs-Duox1 | -----LFSISPLSVLS----- | CLFPGLFHDDGSELPQKYY-- | 1183 |
| Cf-Duox1 | -----LFSISPLSVLS----- | CLFPGLFHNDGSEFPQKYY-- | 1184 |
| Rn-Duox1 | -----LFSISPLSVLS----- | CLFPDLFHDDGSEFPQKYY-- | 1179 |
| Mm-Duox1 | -----LFSISPLSVLS----- | CLFPGLFHDDGSEFPQKYY-- | 1183 |
| Ci-DuoxA | -----AISTQTPGD-----   | LTCLFRDFWRT--SDVLPK   | 1205 |
| Ci-DuoxC | -----SIVTQSPDD-----   | MACLFRDMWYP--SDYIPT   | 1070 |
| Ci-DuoxD | -----SIQTQTPSD-----   | LLCLFRDLWFP--SDYRPT   | 1148 |
| Sp-Duox  | -----HISTQTADD-----   | LTCYFRDFFHR--SHELPK   | 1302 |
| Dm-Duox  | -----HVSTQSHEN-----   | LRCLTREVHFA--SDYKPD   | 1102 |
| Ag-Duox  | -----HVSTQSIEN-----   | LKCLTKEVHFT--SDYRPD   | 1103 |
| Am-Duox  | -----HVSTQPLAH-----   | LRCLTSELSFP--SDARLT   | 1108 |
| Ci-DuoxB | -----HFCVHPLPV-----   | LACLFPKIFVDDGSDLPKS   | 1125 |
| Ce-Duox1 | -----HVGTQSQEG-----   | LACLQEAFFG--SNFLPS    | 1122 |
| Ce-Duox2 | -----HVGTQSDRG-----   | LACLQETFFG--SDVVPT    | 1128 |

TM(IV)

|          |                   |                       |     |
|----------|-------------------|-----------------------|-----|
| Hs-Nox1  | G--SWLNPIQ----    | SRNTTVEYVFTSIA-----   | 174 |
| Cf-Nox1  | D--SWLNPMQ----    | SPNMTVEYVFTSIA-----   | 174 |
| Mm-Nox1  | D--SWLNPIQ----    | SPNMTVMYAAFTSIA-----  | 173 |
| Rn-Nox1  | D--SWLNPIQ----    | SPNVTVMYAAFTSIA-----  | 173 |
| Gg-Nox1  | --KWLNPIH----     | SNQTTVEYVAFITIP-----  | 172 |
| Xt-Nox1  | G--TWLNPVR----    | SPTVTPPYFAFTTIA-----  | 170 |
| Tn-Nox1  | T--TYLNPIR----    | ITDLIPTYFAFTTIA-----  | 172 |
| Tr-Nox1  | T--TYLNPIR----    | SPTLS--TYFVFTTIA----- | 171 |
| O1-Nox1  | E--TFLNPLQHIEA--  | DPQKPKIFAFTSIA-----   | 176 |
| Dr-Nox1  | T--TYLNPPF----    | SNSTPMIFVFTSIA-----   | 174 |
| Mm-Nox2  | E--EYLNFARE--KI-- | KNPEGGLYVAVTRLA-----  | 175 |
| Rn-Nox2  | E--EYLNFARE--KI-- | KNPEGGLYVAVTRLA-----  | 175 |
| Hs-Nox2  | E--SYLNFARE--RI-- | KNPEGGLYLAFTLLA-----  | 175 |
| Cf-Nox2  | E--SYLNFARE--RI-- | KNPEGGLYVAVTLLA-----  | 175 |
| Gg-Nox2  | E--SYINFYRQ--TI-- | PNPVGGLYVAFYLLA-----  | 175 |
| Xt-Nox2  | E--SYLNFVRS--RV-- | PNPIGGINVAFTFLA-----  | 175 |
| Tn-Nox2  | A--SFLNPIRT--NE-- | TN--PTIVMFTTIA-----   | 172 |
| Tr-Nox2  | A--SFLNPIRT--NE-- | TN--PTIVMFTTIA-----   | 172 |
| O1-Nox2  | V--SFLNPIRS--NE-- | TKS--PTIVMFTTIA-----  | 173 |
| Dr-Nox2  | R--SYLNPIRS--ND-- | TN--PTIVMFTTVA-----   | 172 |
| Hs-Nox3  | E--SYLNPVR----    | TFPTNTTELLRTIA-----   | 173 |
| Cf-Nox3  | E--SYLNPIR----    | TFHTNTITELLTIA-----   | 173 |
| Mm-Nox3  | E--SYLNPVR----    | TFDMGTTTELLMTVS-----  | 173 |
| Rn-Nox3  | E--SYLNPVR----    | TLYTGTTTQLLMTVS-----  | 173 |
| Gg-Nox3  | E--SYLNPIR----    | TYETNTTGEVLTIA-----   | 172 |
| Ci-Nox2  | E--TYLNPIR----    | KSVFVGAFFLLTG-----    | 186 |
| Sp-Nox2A | PEDNWLNPVIGAKTL   | PAGLGLIEQALPIA-----   | 187 |
| Sp-Nox2B | P----FKTIRSSD--   | VSLGLVIGPGLSLLA-----  | 163 |
| Mm-Nox4  | -----             | KLLFTTIP-----         | 160 |
| Rn-Nox4  | -----             | KLLFTTVP-----         | 160 |

|          |                                             |      |
|----------|---------------------------------------------|------|
| Hs-Nox4  | -----KLLFTTVP-----                          | 160  |
| Cf-Nox4  | -----KLLFTTVP-----                          | 164  |
| Gg-Nox4  | -----KLLFATVP-----                          | 120  |
| Xt-Nox4  | -----EVVP-----                              | 148  |
| O1-Nox4  | -----LIIFTTIP-----                          | 160  |
| Tr-Nox4  | -----WIILTIP-----                           | 158  |
| Ci-Nox4  | -----LMLVTSLS-----                          | 158  |
| Ag-Nox   | -----RLLFATPT-----                          | 142  |
| Pa-NoxA  | -----G-----                                 | 143  |
| Mg-NoxA  | -----G-----                                 | 142  |
| Fg-NoxA  | -----G-----                                 | 146  |
| An-NoxA  | -----A-----                                 | 141  |
| Pa-NoxB  | -----P-----                                 | 192  |
| Fg-NoxB  | -----P-----                                 | 181  |
| Mg-NoxB  | -----P-----                                 | 196  |
| Dd-NoxA  | -----FATLA-----                             | 156  |
| Dd-NoxB  | Y-----LFFKSVP-----                          | 330  |
| At-rbohC | -----FVNSVE-----                            | 491  |
| At-rbohG | -----FVKSTE-----                            | 443  |
| At-rbohA | -----FVQSVE-----                            | 483  |
| At-rbohB | -----FMKGT-----                             | 438  |
| At-rbohD | -----FVKGVE-----                            | 515  |
| At-rbohF | -----LVKGPE-----                            | 526  |
| At-rbohI | -----LVNTPV-----                            | 514  |
| At-rbohE | -----LMTGAE-----                            | 504  |
| At-rbohH | -----LMLTSV-----                            | 455  |
| At-rbohJ | -----LMLTPV-----                            | 466  |
| Hs-Nox5  | -----WVHGSA-----                            | 339  |
| Cf-Nox5  | -----WIHGLA-----                            | 366  |
| Bt-Nox5  | -----WVHGSA-----                            | 374  |
| Md-Nox5  | -----WVYGTA-----                            | 346  |
| Xt-Nox5  | -----WISGTA-----                            | 356  |
| Tr-Nox5  | -----WVKGTA-----                            | 280  |
| Tn-Nox5  | -----WVKGTA-----                            | 158  |
| Gg-Nox5  | -----GFGGTA-----                            | 329  |
| O1-Nox5  | -----WVKGTA-----                            | 353  |
| Dr-Nox5  | -----WVNGTA-----                            | 236  |
| Sp-Nox5A | -----PVSGSA-----                            | 347  |
| Sp-Nox5B | -----LVEGSC-----                            | 312  |
| Ag-Nox5  | -----LIGGCA-----                            | 398  |
| Am-Nox5  | -----LVRGYA-----                            | 400  |
| Dm-Nox5  | -----LIPGCA-----                            | 403  |
| Dd-NoxC  | E-----MIFNSLP-----                          | 721  |
| Mg-NoxC  | -----YSAYVSSLP-----                         | 364  |
| Fg-NoxC  | -----YIDYVRSVP-----                         | 289  |
| Cc-NoxD  | -----LWSFNMSV-----                          | 154  |
| Py-NoxD  | -----YNGFTQLF-----                          | 149  |
| Xt-Duox1 | Y-----YWWFFETVP-----                        | 1145 |
| Xt-Duox2 | L-----HPECLPLLT-----                        | 1197 |
| Gg-Duox  | -----DPFPILPFT-----                         | 1083 |
| Tr-Duox  | W-----SWWFFQTV-----                         | 1115 |
| Tn-Duox  | W-----SWWFFETVPGTAEVKMVNLSHRKMPVHPGCRKATRTP | 1259 |
| O1-Duox  | W-----YWWFLQTV-----                         | 1192 |
| Dr-Duox  | W-----TFWFFKTV-----                         | 1143 |
| Mm-Duox2 | -----WWFFETVP-----                          | 1157 |

|          |                      |      |
|----------|----------------------|------|
| Rn-Duox2 | -----WWFFETVP-----   | 1157 |
| Hs-Duox2 | -----WWFFQTV-----    | 1188 |
| Cf-Duox2 | -----WWFFQTV-----    | 940  |
| Hs-Duox1 | -----WWFFQTV-----    | 1191 |
| Cf-Duox1 | -----WWFFQTV-----    | 1192 |
| Rn-Duox1 | -----WWFFQTV-----    | 1187 |
| Mm-Duox1 | -----WWFFQTV-----    | 1191 |
| Ci-DuoxA | FH-----YWCWQTIT----- | 1215 |
| Ci-DuoxC | FV-----FWLFTIT-----  | 1080 |
| Ci-DuoxD | FV-----FWCLQTL-----  | 1158 |
| Sp-Duox  | FH-----YAWGTIT-----  | 1312 |
| Dm-Duox  | IT-----FWLFTVT-----  | 1112 |
| Ag-Duox  | IT-----YWLFTIT-----  | 1113 |
| Am-Duox  | IS-----FWLFRVT-----  | 1118 |
| Ci-DuoxB | LT-----WWFFETIT----- | 1135 |
| Ce-Duox1 | IS-----YWFSTIT-----  | 1132 |
| Ce-Duox2 | LS-----YWFYGTIT----- | 1138 |

|          | <u>TM(IV)</u>                       | <u>TM(V)</u>              |     |
|----------|-------------------------------------|---------------------------|-----|
| Hs-Nox1  | -----GLTGVIMTIALILMVTSAFERR-----    | -----SYFEVFWYTHHLFIF----- | 213 |
| Cf-Nox1  | -----GLTGVIITIALVLMVTSAMEFIRR-----  | -----SYFEVFWYTHHIFII----- | 213 |
| Mm-Nox1  | -----GLTGVIATVALVLMVTSAMEFIRR-----  | -----NYFELFWYTHHLFIV----- | 212 |
| Rn-Nox1  | -----GLTGVVATVALVLMVTSAMEFIRR-----  | -----NYFELFWYTHHLFII----- | 212 |
| Gg-Nox1  | -----GLTGVIITLALILMITSSTEFIRR-----  | -----NYFEVFWYTHHLFII----- | 211 |
| Xt-Nox1  | -----GLTGVVITLALILMITSSTEFIRR-----  | -----CYFEVFWYTHHLFVI----- | 209 |
| Tn-Nox1  | -----GLTGVIITLALILIISSMEVIRR-----   | -----SYFEVFWYTHHLFII----- | 211 |
| Tr-Nox1  | -----GLTGVIITLALILIISSMEVIRR-----   | -----SYFEVFWYTHHLFII----- | 210 |
| O1-Nox1  | -----GLTGVVITLALILIISSMEVIRR-----   | -----SYFEVFWYTHHLFIV----- | 215 |
| Dr-Nox1  | -----GLTGVVITLALILMITSSTEFIRR-----  | -----SYFEVFWYTHHLFIV----- | 213 |
| Mm-Nox2  | -----GITGIVITLCLILIISSSTKTIRR-----  | -----SYFEVFWYTHHLFVI----- | 214 |
| Rn-Nox2  | -----GITGIVITLCLILIISSSTKTIRR-----  | -----SYFEVFWYTHHLFVI----- | 214 |
| Hs-Nox2  | -----GITGIVITLCLILIISSSTKTIRR-----  | -----SYFEVFWYTHHLFVI----- | 214 |
| Cf-Nox2  | -----GITGIVITLCLILIISSSTKTIRR-----  | -----SYFEVFWYTHHLFVI----- | 214 |
| Gg-Nox2  | -----GLTGVIITLALILIISSSTKIIRR-----  | -----SYFEVFWYTHHLFVI----- | 214 |
| Xt-Nox2  | -----GLTGVVITLALILIISSSTKTIRR-----  | -----SYFEVFWYTHHLFVI----- | 214 |
| Tn-Nox2  | -----GLTGVAITLALILIISSMEVIRR-----   | -----SYFEVFWYTHHLFVI----- | 211 |
| Tr-Nox2  | -----GLTGVAITLALILIISSMEVIRR-----   | -----SYFEVFWYTHHLFII----- | 211 |
| O1-Nox2  | -----GLTGVVITLALILIISSMEVIRR-----   | -----SYFEVFWYTHHLFVI----- | 212 |
| Dr-Nox2  | -----GLTGVVITLALILIISSMEVIRR-----   | -----SYFEVFWYTHHLFIV----- | 211 |
| Hs-Nox3  | -----GVTGLVISLALVLMITSSTEFIRQ-----  | -----ASYELFWYTHHVFIV----- | 212 |
| Cf-Nox3  | -----GVTGLIISLALVLMITSSTESIRQ-----  | -----VSYELFWYTHHVFII----- | 212 |
| Mm-Nox3  | -----GITGLGISLALVFIMTSSTEFIRR-----  | -----SSYELFWYTHHIFVF----- | 212 |
| Rn-Nox3  | -----GITGLVISLALILMITSSTEFIRQ-----  | -----SSYELFWYTHHIFIF----- | 212 |
| Gg-Nox3  | -----GVTGVMITVAFVLIVTSSTELIRR-----  | -----SCYEVFWYTHHLFVV----- | 211 |
| Ci-Nox2  | -----GWTGVIIITLSLFFMVTSSLEFIRR----- | -----SYFEVFWYTHHLFIV----- | 225 |
| Sp-Nox2A | -----GWSGAVTLALILMFSSATEFIRR-----   | -----SYFETFWYTHHLFIV----- | 226 |
| Sp-Nox2B | -----GWTGAVLALTYILMFTSAFIR-----     | -----YFETFWYTHHLFVI-----  | 201 |
| Mm-Nox4  | -----GLTGVMVVVFLMVTASTYAIRV-----    | -----SNYDIFWYTHNLFFV----- | 199 |
| Rn-Nox4  | -----GLTGVMVVVFLMVTASTYAIRV-----    | -----SNYDIFWYTHNLFFV----- | 199 |
| Hs-Nox4  | -----GLTGVMVVVFLMVTASTYAIRV-----    | -----SNYDIFWYTHNLFFV----- | 199 |
| Cf-Nox4  | -----GLTGVMVVVFLMVTASTYAIRV-----    | -----SNYDIFWYTHNLFFV----- | 203 |
| Gg-Nox4  | -----GLTGVMVVVFLMCTASTYAIRV-----    | -----SNYDIFWYTHNLFFV----- | 159 |
| Xt-Nox4  | -----GVTGVMVLVFLMCTASTSSIRT-----    | -----ANYGIFLHTHNLFFI----- | 187 |

|          |                                                            |      |
|----------|------------------------------------------------------------|------|
| O1-Nox4  | -----GVSGVLLVLILLMFISSSH CIRV-----CNYEIFWYTHNLFIV          | 199  |
| Tr-Nox4  | -----GVTGIVLVILFLMLSSSN CVRS-----FNYEIFWYTHNLFIV           | 197  |
| Ci-Nox4  | -----GITGILLVIVLVISAFASRPIRR-----NNHNKFWKTHHIFIV           | 197  |
| Ag-Nox   | -----GFSGCIMLLTLAAMAYLARRSMRD-----RFYNSFFTSHHLFLV          | 181  |
| Pa-NoxA  | -----GATGHVMLLCMLMYTAAHHRIRQ-----QSFETFWYTHHLFIP           | 182  |
| Mg-NoxA  | -----GATGHMMLLCMLMYTAAHHRIRQ-----QSFETFWYTHHLFIP           | 181  |
| Fg-NoxA  | -----GITGHIMLLCMLMFTSAHARIRQ-----QSFETFWYTHHLFIP           | 185  |
| An-NoxA  | -----GVTGHVMLFCMLMYTAAHHRIRQ-----QSFETFWYTHHLFIP           | 180  |
| Pa-NoxB  | -----GWTGYVMLIALMGMVITSVEKTRR-----ANYERFWYTHHMFIV          | 231  |
| Fg-NoxB  | -----GWTGYVMLIALMGMVLTSM EKPRR-----ANFERFWYTHHMFIV         | 220  |
| Mg-NoxB  | -----GWTGYVMLIALMGMVFTSVEKPRR-----ANYERFWYTHHFFIV          | 235  |
| Dd-NoxA  | -----GWTGHVVCIVMVMYTSAVESIRR-----PMFEGFWYTHHLFVV           | 195  |
| Dd-NoxB  | -----GITGHIMLLILIVSSMWRIRR-----PMFEIFWYVHHLFIP             | 369  |
| At-rbohC | -----GITGLVMVLLMAIAFTLATPWFRRGKLN--YLPGLKKLASFNAFWYTHHLFVI | 543  |
| At-rbohG | -----GITGLVMVFLMVAFTLAMPWFRRGKLEKKLPGPLKKLASFNAFWYTHHLFVI  | 496  |
| At-rbohA | -----GVTGIGMVVLMTIAFTLATTFWRRNKLN--LPGPLKKITGFNAFWYSHHLFVI | 534  |
| At-rbohB | -----GWTGVTMVVLMVAVYLAQSWFRNRAN--LPKSLKRLTGFNAFWYSHHLFVI   | 489  |
| At-rbohD | -----GWTGIVMVVLMIAIAFTLATPWFRRNKLN--LPNFKKLTGFNAFWYTHHLFII | 566  |
| At-rbohF | -----GITGILMVLIMIISFTLATRWRFRNLVK--LPKPFDRLTGFNAFWYSHHLFVI | 577  |
| At-rbohI | -----GITGIIMVAFMLIAFTLASRRCRRNLTK--LPKPFDKLTGFNAFWYSHHLLLT | 565  |
| At-rbohE | -----GITGISMVILTIAFTLASTHFRNRVR--LPAPLDRLTGFNAFWYTHHLLVV   | 555  |
| At-rbohH | -----SITGVLMIFFMGFSFTLAMHYFRNRIVK--LPKPFNVLAGFNAFWYAHHLLVL | 506  |
| At-rbohJ | -----SVTGVLMIIFMGISFTLAMHYFRNRIVK--LPIPFNRLAGFNSFWYAHHLLVI | 517  |
| Hs-Nox5  | -----SPTGVALLLLLLLMFICSSS CIRR-----SGHFEVFWYTHLSYLL        | 379  |
| Cf-Nox5  | -----SPTGVALLLLLLLMFACSSS CIRRS-----GHFEVFWYTHLSYLP        | 406  |
| Bt-Nox5  | -----SPTGVALLLLLLLMFACSSS CVRRS-----GHFEVFWYTHLSYLP        | 414  |
| Md-Nox5  | -----SLTGIVLQLLILIMLVCS SFCVRRS-----GHFEVFWYTHLSYIS        | 386  |
| Xt-Nox5  | -----SITGILLQLLICLMLFSNTFVRKG-----GYFEVFWYTHLSYIW          | 396  |
| Tr-Nox5  | -----SVTGVLVLFQFIMCLMVLCSSTFVRRS-----GHFEIFWYSHLSYVW       | 320  |
| Tn-Nox5  | -----SLTGVLVQLLIGLMVLCSSTFVRAH-----GHFEVFWYSHLSYVW         | 198  |
| Gg-Nox5  | -----PQTGLALQLLFLAMLAFSSPCVRRG-----GHFELFWYSHLSYVP         | 369  |
| O1-Nox5  | -----SLTGVLVLLLILMVLCSSTFVRR-----SGHFEVFWYSHLSYIW          | 393  |
| Dr-Nox5  | -----SITGVVIQILIGLMVVCSSTFVRR-----SGHFEVFWYSHLSYIW         | 276  |
| Sp-Nox5A | -----FLTGWVLDIILAIVICSM PFVRR-----SGHFQVVFYFTHMLYVW        | 387  |
| Sp-Nox5B | -----IITGILIIIVLIIIMTICSLPFIRR-----NGYFKVFWYTHQLCIV        | 352  |
| Ag-Nox5  | -----NPTGVVLVILLIMFICSQPFVRR-----GGSFEVFWYTHLLYVP          | 438  |
| Am-Nox5  | -----NPTGFILVILFLIIMICSM PFVRR-----GGCFEIFYWYSHLLYIP       | 440  |
| Dm-Nox5  | -----NPTGVALLAILVVMVFC S QPFVRR-----KGSFEVFWYTHLLYVP       | 443  |
| Dd-NoxC  | -----GVTGFIMISFLIIMAILSLKIIRK-----SNFELFYSHHLFIG           | 760  |
| Mg-NoxC  | -----GITGLTALGLFYTLALLSMPQVRR-----WNYEVFQLAHLMLFP          | 403  |
| Fg-NoxC  | -----GFTGITALGLFWILCLLSIPQVRR-----WNYEVFQLGHLLMFP          | 328  |
| Cc-NoxD  | -----ITGFLLAIVFGTMLVLRPSVVK-----NNFRLFYAVHIGAT             | 192  |
| Py-NoxD  | -----ITGSMLVALFAILFVTSVRVNRS-----KRYELFWYSHAICAS           | 187  |
| Xt-Duox1 | -----GMTGVLLLAVMALMYVFS CYHFRR-----VSFRCFWLTHHLYVW         | 1184 |
| Xt-Duox2 | -----GLTGVLVLLAVLALMYVFS SHHFRR-----ISFRGFVWTHHLYIL        | 1236 |
| Gg-Duox  | -----GMTGVLLLIILAVMYVFATHHFRR-----VSFQAFWITHHLYVL          | 1122 |
| Tr-Duox  | -----GLTGILLFLTAFMYVFASRYFRR-----ISFRGFWFTHCLYVW           | 1154 |
| Tn-Duox  | ILVLLLLGLTGILLFLTAFMYVFASRYFRR-----ISFRGFWLTHCLYVL         | 1305 |
| O1-Duox  | -----GITGVLLLVLAFMYVFASRYFRH-----ISFRAFWITHYLYIV           | 1231 |
| Dr-Duox  | -----GITGVILLLIFAFMYVFASHYFRR-----ISFRGFWITHHLYVL          | 1182 |
| Mm-Duox2 | -----GMTGVLLLVLAIMYVFASHHFRR-----HSFRGFWLTHHLYVW           | 1196 |
| Rn-Duox2 | -----GMTGVLLLVLAIMYVFASHHFRR-----HSFRGFWLTHHLYVW           | 1196 |
| Hs-Duox2 | -----GMTGVLLLVLAIMYVFASHHFRR-----RSFRGFWLTHHLYIL           | 1227 |
| Cf-Duox2 | -----GMTGVLLLVLAIMYVFASHHFRR-----RSFRGFWLTHHLYIV           | 979  |
| Hs-Duox1 | -----GLTGVLVLLIILAIMYVFASHHFRR-----RSFRGFWLTHHLYIL         | 1230 |

|          |                                      |                 |      |
|----------|--------------------------------------|-----------------|------|
| Cf-Duox1 | -----GLTGVMLLLVLAIMYVFASHHFRR-----   | HSFRGFWLTHHLYIL | 1231 |
| Rn-Duox1 | -----GLTGVLLLLALAIMYVFASHHFRR-----   | RSFRGFWLTHHLYIF | 1226 |
| Mm-Duox1 | -----GLTGVLLLLALAIMYVFASHHFRR-----   | RSFRGFWLTHHLYIF | 1230 |
| Ci-DuoxA | -----GITGVLLTLIVMYTFASDYSRR-----     | RVFQWFVWTHNFGYI | 1254 |
| Ci-DuoxC | -----GITGVILTLALIVMYVFASNYARR-----   | MIFNWFVWTHKGLYL | 1119 |
| Ci-DuoxD | -----GNTGVLLTIIFIVMYVFSLDYPRQ-----   | VMFNWFQWIHFFGYI | 1197 |
| Sp-Duox  | -----GFTGILLVMVCTVIYTFAFQYARR-----   | RVFNLFWFTHNM-WI | 1350 |
| Dm-Duox  | -----GTTGVMLFIIIMCIIFVFAHPTIRK-----  | KAYNFFWNMHTL-YI | 1150 |
| Ag-Duox  | -----GVTGVMLFVVMCIIFAFVFAHPTIRK----- | KAYKFFWNAHSL-YV | 1151 |
| Am-Duox  | -----GLTGILLFIVMTIIFVFAHPTIRQ-----   | KAYKFFWSTHSL-YV | 1156 |
| Ce-Duox1 | -----GLTGIALVAVMCIIVFALPCFIK-----    | RAYHAFRLTHLL-NI | 1170 |
| Ce-Duox2 | -----GLTGIGLVIVMSIIYFALPKFTR-----    | RAYHAFRLTHLL-NI | 1176 |
| Ci-DuoxB | -----GLTGVLLLLTISIIYVFAMQYSRR-----   | FCFRAFWITHHL-YT | 1173 |

\*\* \* \* \*

TM(V)

|          |                                                                   |     |
|----------|-------------------------------------------------------------------|-----|
| Hs-Nox1  | Y-ILGLGIHGIGGIVRGQTEESMNESSHPRKCAESF-EMWDD-----                   | 252 |
| Cf-Nox1  | Y-FIGLGIHGIGGIVRGQTEESLNESHPRCAESF-KQWDD-----                     | 252 |
| Mm-Nox1  | Y-IICLGIHGLGGIVRGQTEESLGESHPHNCSSHSF-HEWDD-----                   | 251 |
| Rn-Nox1  | Y-IICLGIHGLGGIVRGQTEESMSESHPRNCSYSF-HEWDK-----                    | 251 |
| Gg-Nox1  | Y-FIGLVFHGAGLVRGQTEESMKEVHPQSCAEFL-VNKSKE-----                    | 251 |
| Xt-Nox1  | F-FIGLVFHGAGRIVRGQTSDSMETNNYEKCHNSF-TQWQN-----                    | 248 |
| Tn-Nox1  | F-FAGLVFHGAGRIVRSQ-QTTNPPHNTSYCKDHP-DDWGH-----                    | 249 |
| Tr-Nox1  | F-FAGLVFHGAGRIVRSQ-NSE-PAHDATFCKDRT-EDWGK-----                    | 247 |
| Ol-Nox1  | F-FVGLVFHGYGRIVRSQ-FNT-DDHNATFCKDRP-DDWGK-----                    | 252 |
| Dr-Nox1  | F-FAGLVFHGAGRVVRGQ-VTDPHNSFCEDQP-DNWGK-----                       | 251 |
| Mm-Nox2  | F-FIGLAIHGAERIVRGQTAESLEEHLNLDICADKI-EEWG-----                    | 252 |
| Rn-Nox2  | F-FIGLAIHGAERIVRGQTSDSLKEHLNLDVCADKI-KEWG-----                    | 252 |
| Hs-Nox2  | F-FIGLAIHGAERIVRGQTAESLAVHNIYVCEQKI-SEWG-----                     | 252 |
| Cf-Nox2  | F-FIGLAIHGAERIVRGQTAASRLHNYKVCADNI-SQWG-----                      | 252 |
| Gg-Nox2  | F-FIGLVFHGAGRIVRGQTAESLAEHIPEVCSKNF-TDWG-----                     | 252 |
| Xt-Nox2  | F-FIGLVFHGAGKIVRGQTDKSLKHNSTECEDKF-TEWG-----                      | 252 |
| Tn-Nox2  | F-FIGLVHGFGRIVRGQTAASLKTNKPEVCADRF-EEWGR-----                     | 250 |
| Tr-Nox2  | F-FIGLVHGFGRIVRGQTPASLKSNDPTVCADRF-EDWGR-----                     | 250 |
| Ol-Nox2  | F-FIGLVFHGFGRIVRGQTSRSLSDNDPVCADRF-EDWGK-----                     | 251 |
| Dr-Nox2  | F-FIGLVHGIGRIVRGQTDADLQVHDPTICHSKF-EKWGQ-----                     | 250 |
| Hs-Nox3  | F-FLSLAIHGTGRIVRGQTDLSLHNIYFCRDRY-AEWQT-----                      | 251 |
| Cf-Nox3  | F-FIGLAIHGAGRIVRGQTPESQLLHNVTFCRDHH-AQWQK-----                    | 251 |
| Mm-Nox3  | F-FISLAIHGGGRIIRGQTPESLRLHNVTYCRDHY-AEWQA-----                    | 251 |
| Rn-Nox3  | L-FISLAIHGGGRIIRGQTPESLRLHNVTFCRDHF-DEWQE-----                    | 251 |
| Gg-Nox3  | F-FIGLIIHGTGQLVRGQTPHSLLLHNIYCKEYH-LEWEK-----                     | 250 |
| Ci-Nox2  | F-YGFLVVHGISMQVRGQTPQSLTVHDPIRCSTIDPATWSQ-----                    | 265 |
| Sp-Nox2A | Y-FAMLLAHGVGGIIRSQ--TNLDRHDVVFCSENL-DVWGP-----                    | 263 |
| Sp-Nox2B | Y-YAMLMTHTGMGGVVKYQ--TNVDEHDPVECMVDE-ETFDQ-----                   | 238 |
| Mm-Nox4  | F-YMLLLHVSGLLKYQTNVDTHPPGCISLNQTSSQNMSIPDYVSEHF-----              | 247 |
| Rn-Nox4  | F-YMLLLHVSGLLKYQTNLDTHPPGCISLNRTPSQNMSIADYVSEHF-----              | 247 |
| Hs-Nox4  | F-YMLLTLHVSGLLKYQTNLDTHPPGCISLNRTPSQNMSIADYVSEHF-----             | 247 |
| Cf-Nox4  | F-YMLLMLHVSGLLKYQANLDTHPPGCININGTRYQNIHLPNRYSEHF-----             | 251 |
| Gg-Nox4  | F-YILLMLHVSGLVLYQTNLEEHPGCFNPNKTLGNMTPKSFEEFPDY-----              | 210 |
| Xt-Nox4  | F-YLLLLHACAGVLKYQSNLEEHPGCLYLNRSAQGEVPGAAADGGFPPGR-----           | 238 |
| Ol-Nox4  | F-YIILMVHMAGGALKFQTNIEAHPGCLRASQS-----                            | 232 |
| Tr-Nox4  | F-YIVLVMHMGVGLKYQTNIEAHPGCLTANQSNM-----                           | 232 |
| Ci-Nox4  | F-YALIFIHAMDGVIKYQTNVDQHKPGCFILIDQTNNTSNIISMVQPEPEFPNHPSMVKP----- | 256 |
| Ag-Nox   | F-YGMFVYHPLRLVHGGSTLNDIAIDRFNIIKHQTNVDK-----                      | 218 |

|          |                                           |      |
|----------|-------------------------------------------|------|
| Pa-NoxA  | F-FLGLYHTVGC FVRDTADAI SPFAGDEYWEHCI----- | 216  |
| Mg-NoxA  | F-FLGLYHTVGC FVRDTVEPHSPFAGDEYWNHCI-----  | 215  |
| Fg-NoxA  | F-FLGLYHTVGC FVRDTPEAFSPFAGDEFWEHCI-----  | 219  |
| An-NoxA  | F-LLGLYTHATGCFVRDSAEPYSPFAGERFWKHCI-----  | 214  |
| Pa-NoxB  | F-FFFWSIHGAF CMIQPDFAFPCISIG---TQAI-----  | 261  |
| Fg-NoxB  | F-FFFWSIHGAF CMIQPDVAPFCTSIG---SSAI-----  | 250  |
| Mg-NoxB  | F-FFFWSIHGAF CMIQPDFAFPCMSFG---TSAI-----  | 265  |
| Dd-NoxA  | F-FGLLVVHGLHSILEP-TSF-----                | 214  |
| Dd-NoxB  | F-YILLCFHGYSKILKDPQS-----                 | 389  |
| At-rbohC | V-YILLVAHGYYLYLTRD-----                   | 560  |
| At-rbohG | V-YILLVLHGYYIYLNKE-----                   | 513  |
| At-rbohA | V-YLLVHGFYVYLIIEP-----                    | 552  |
| At-rbohB | V-YVLLIVHGYFVYLSKE-----                   | 506  |
| At-rbohD | V-YALLIVHGIKLYLTKI-----                   | 583  |
| At-rbohF | V-YILLILHGIFLYFAKP-----                   | 594  |
| At-rbohI | V-YVLLIVHGVSLYLEHK-----                   | 582  |
| At-rbohE | V-YIMLIVHGTFLFFADK-----                   | 572  |
| At-rbohH | A-YILLI IHGYLIIIEKP-----                  | 523  |
| At-rbohJ | A-YALLI IHGYLIIIEKP-----                  | 534  |
| Hs-Nox5  | V-WLLIFHG-----                            | 388  |
| Cf-Nox5  | M-WILLILHGPN-----                         | 417  |
| Bt-Nox5  | M-WLLILHGPN-----                          | 425  |
| Md-Nox5  | I-WALLIVHGPN-----                         | 397  |
| Xt-Nox5  | I-WILLFLHTPK-----                         | 407  |
| Tr-Nox5  | V-WILLMVHCAN-----                         | 331  |
| Tn-Nox5  | V-WALLMVHCAN-----                         | 209  |
| Gg-Nox5  | V-WALLFHAPN-----                          | 380  |
| O1-Nox5  | V-LILLIVHC-----                           | 402  |
| Dr-Nox5  | V-SALLVHC-----                            | 285  |
| Sp-Nox5A | F-WGLLL IHG-----                          | 396  |
| Sp-Nox5B | F-WCLII IHS-----                          | 361  |
| Ag-Nox5  | F-WILVLFHG-----                           | 447  |
| Am-Nox5  | Y-WILVILHA-----                           | 449  |
| Dm-Nox5  | F-WILCLFHG-----                           | 452  |
| Dd-NoxC  | F-YVLLILHGTMGWIRPPTF-----                 | 779  |
| Mg-NoxC  | I-IGLLAAHGTAQLLQYAMFGY-----               | 424  |
| Fg-NoxC  | I-IGLMAHGTAALLQWPMFGY-----                | 349  |
| Cc-NoxD  | LFFGLLI IHGMFRQVPYTYK-----                | 212  |
| Py-NoxD  | LGFVLLMIHGLHYGVYWTYR-----                 | 207  |
| Xt-Duox1 | F-YILTI IHGSFALIQP-----                   | 1201 |
| Xt-Duox2 | L-YILTILHGSFGLLQPP-----                   | 1253 |
| Gg-Duox  | L-YVLVI IHGSYALIQP-----                   | 1139 |
| Tr-Duox  | V-YALTVIHGSYALIQEP-----                   | 1171 |
| Tn-Duox  | V-YALTVVHGSYAFIQEP-----                   | 1322 |
| O1-Duox  | V-YILTVIHGSFALLQEP-----                   | 1248 |
| Dr-Duox  | I-YVLTVVHGSYGLLQPP-----                   | 1199 |
| Mm-Duox2 | L-YVLII IHGSYALIQLP-----                  | 1213 |
| Rn-Duox2 | L-YALII IHGSYALIQLP-----                  | 1213 |
| Hs-Duox2 | L-YALLI IHGSYALIQLP-----                  | 1244 |
| Cf-Duox2 | L-YVLLI IHGSFGLIQLP-----                  | 996  |
| Hs-Duox1 | L-YVLLI IHGSFALIQLP-----                  | 1247 |
| Cf-Duox1 | L-YVLLI IHGSFGLIQLP-----                  | 1248 |
| Rn-Duox1 | L-YILLI IHGSFALIQMP-----                  | 1243 |
| Mm-Duox1 | L-YILLI IHGSFALIQMP-----                  | 1247 |
| Ci-DuoxA | FLFFFMIHSGSGLVQDP-----                    | 1272 |

|          |                         |      |
|----------|-------------------------|------|
| Ci-DuoxC | SLYFFSFVHGSGMLISSP----- | 1137 |
| Ci-DuoxD | SVYFFTVLHGSGMLIQIP----- | 1215 |
| Sp-Duox  | IYFILMFLHGSGRLVQPP----- | 1368 |
| Dm-Duox  | GLYLLSLIHGLARLTGPP----- | 1168 |
| Ag-Duox  | VLYALCLVHGLARLTGAP----- | 1169 |
| Am-Duox  | VLYALCLIHGLARLTGSP----- | 1174 |
| Ci-DuoxB | VLYILTLHGSLGIVQAP-----  | 1191 |
| Ce-Duox1 | AFYALTLHGLPKLLDSP-----  | 1188 |
| Ce-Duox2 | GFYALTLHGLPSLFGSP-----  | 1194 |

\*

|          |                                                              |     |
|----------|--------------------------------------------------------------|-----|
| Hs-Nox1  | -----                                                        |     |
| Cf-Nox1  | -----                                                        |     |
| Mm-Nox1  | -----                                                        |     |
| Rn-Nox1  | -----                                                        |     |
| Gg-Nox1  | -----                                                        |     |
| Xt-Nox1  | -----                                                        |     |
| Tn-Nox1  | -----                                                        |     |
| Tr-Nox1  | -----                                                        |     |
| Ol-Nox1  | -----                                                        |     |
| Dr-Nox1  | -----                                                        |     |
| Mm-Nox2  | -----                                                        |     |
| Rn-Nox2  | -----                                                        |     |
| Hs-Nox2  | -----                                                        |     |
| Cf-Nox2  | -----                                                        |     |
| Gg-Nox2  | -----                                                        |     |
| Xt-Nox2  | -----                                                        |     |
| Tn-Nox2  | -----                                                        |     |
| Tr-Nox2  | -----                                                        |     |
| Ol-Nox2  | -----                                                        |     |
| Dr-Nox2  | -----                                                        |     |
| Hs-Nox3  | -----                                                        |     |
| Cf-Nox3  | -----                                                        |     |
| Mm-Nox3  | -----                                                        |     |
| Rn-Nox3  | -----                                                        |     |
| Gg-Nox3  | -----                                                        |     |
| Ci-Nox2  | -----                                                        |     |
| Sp-Nox2A | -----                                                        |     |
| Sp-Nox2B | -----                                                        |     |
| Mm-Nox4  | -----HGSLPRGFSKLEDR-YQKTLVKI-----                            | 269 |
| Rn-Nox4  | -----HGSLPGGFSKLEDH-YQKTLVKI-----                            | 269 |
| Hs-Nox4  | -----HEPFPEGFSKPAEF-TQHKFVKI-----                            | 269 |
| Cf-Nox4  | -----HESFPGGLSKPDEL-TQNRSVNI-----                            | 273 |
| Gg-Nox4  | -----TTEPFPELTFPQPL-VQSNFMRI-----                            | 233 |
| Xt-Nox4  | -----AARALMGSFFSHEDMSVHNNSEKI-----                           | 262 |
| Ol-Nox4  | -----LRQQQAEDLD-QKQR-----                                    | 247 |
| Tr-Nox4  | -----DPQAKEMEKADNEERR-----                                   | 248 |
| Ci-Nox4  | KMVAVPEPPHREPFPPNMKLASKMPSKTDKFMNNTAPQPHHVIMPEPEPMPHKGAGHAPN | 316 |
| Ag-Nox   | -----HKIMCDLVNDVTLHSNEDLLVL-----                             | 240 |
| Pa-NoxA  | -----                                                        |     |
| Mg-NoxA  | -----                                                        |     |
| Fg-NoxA  | -----                                                        |     |
| An-NoxA  | -----                                                        |     |

|          |       |
|----------|-------|
| Pa-NoxB  | ----- |
| Fg-NoxB  | ----- |
| Mg-NoxB  | ----- |
| Dd-NoxA  | ----- |
| Dd-NoxB  | ----- |
| At-rbohC | ----- |
| At-rbohG | ----- |
| At-rbohA | ----- |
| At-rbohB | ----- |
| At-rbohD | ----- |
| At-rbohF | ----- |
| At-rbohI | ----- |
| At-rbohE | ----- |
| At-rbohH | ----- |
| At-rbohJ | ----- |
| Hs-Nox5  | ----- |
| Cf-Nox5  | ----- |
| Bt-Nox5  | ----- |
| Md-Nox5  | ----- |
| Xt-Nox5  | ----- |
| Tr-Nox5  | ----- |
| Tn-Nox5  | ----- |
| Gg-Nox5  | ----- |
| Ol-Nox5  | ----- |
| Dr-Nox5  | ----- |
| Sp-Nox5A | ----- |
| Sp-Nox5B | ----- |
| Ag-Nox5  | ----- |
| Am-Nox5  | ----- |
| Dm-Nox5  | ----- |
| Dd-NoxC  | ----- |
| Mg-NoxC  | ----- |
| Fg-NoxC  | ----- |
| Cc-NoxD  | ----- |
| Py-NoxD  | ----- |
| Xt-Duox1 | ----- |
| Xt-Duox2 | ----- |
| Gg-Duox  | ----- |
| Tr-Duox  | ----- |
| Tn-Duox  | ----- |
| Ol-Duox  | ----- |
| Dr-Duox  | ----- |
| Mm-Duox2 | ----- |
| Rn-Duox2 | ----- |
| Hs-Duox2 | ----- |
| Cf-Duox2 | ----- |
| Hs-Duox1 | ----- |
| Cf-Duox1 | ----- |
| Rn-Duox1 | ----- |
| Mm-Duox1 | ----- |
| Ci-DuoxA | ----- |
| Ci-DuoxC | ----- |
| Ci-DuoxD | ----- |
| Sp-Duox  | ----- |
| Dm-Duox  | ----- |



Ag-Duox -----  
 Am-Duox -----  
 Ci-DuoxB -----  
 Ce-Duox1 -----  
 Ce-Duox2 -----

TM(VI)

Hs-Nox1 -----RDSHCRRPKFEGHPPESWKWI-LA-PVILYICERILRFYRSQQKVVI 297  
 Cf-Nox1 -----HDSHCKHPRFEGPLAESWKWI-LA-PGVLYILERILRFYRSQQKVVI 297  
 Mm-Nox1 -----HKGSCRHPHFAGHPPESWKWI-LA-PIAFYIFERILRFYRSQQKVVI 296  
 Rn-Nox1 -----YERSCRSHPFVGGPPESWKWI-LA-PIAFYIFERILRFYRSRQKVVI 296  
 Gg-Nox1 -----CRHQCKEPEFGSIPAEGMGVGLQ-ESRLLHTPGCCXSSHTGTEIPA 298  
 Xt-Nox1 -----SKSSNRDDDDHHNDKCTVPAFQNE-PGVRYKMKMYFETROKRKTHAI 295  
 Tn-Nox1 -----IPECP IPQFAGGFPQTMMWV-IA-PMFLYVCERLIRFVRYMQTVRY 293  
 Tr-Nox1 -----IPECP IPQFSGGFPQTMMWV-IG-PMVLYLCERLIRFIRYMQTVRY 291  
 Ol-Nox1 -----IPECP IPQFKGGEPMTWKWV-IG-PMIYVCERLIRFIRYMQAVQY 296  
 Dr-Nox1 -----IPECP IPQFAGGSPQTMMWV-IG-PMIYICERLIRFIRYMQPVTY 295  
 Mm-Nox2 -----KIKECPVPKFAGNPPMTWKWI-VG-PMFLYLCERLIRFVRSQQKVVI 297  
 Rn-Nox2 -----KIKECPVPKFAGNPPMTWKWI-VG-PMFLYLCERLIRFVRSQQKVVI 297  
 Hs-Nox2 -----KIKECP IPQFAGNPPMTWKWI-VG-PMFLYLCERLIRFVRSQQKVVI 297  
 Cf-Nox2 -----KIPDCP IPQFSGNPPMTWKWI-VG-PMFLYLCERLIRFVRSQQKVVI 297  
 Gg-Nox2 -----KKGACVPQFAGNPPMTWKWV-VG-PMFLYFCERLIRFVRSQQKVVI 297  
 Xt-Nox2 -----NITSCP IPQFAGNEPMTWKWV-VA-PMVLYVFERLIRFVRSQQKVVI 297  
 Tn-Nox2 -----NGSDCAVPEFAGNPPMTWKWV-VG-PMIYVCERLIRFVRSQQKVVI 295  
 Tr-Nox2 -----NGSNCAVPEFAGNPPMTWKWV-VG-PMIYVCERLIRFVRSQQKVVI 295  
 Ol-Nox2 -----NESGCAVPAFAGNPPMTWKWV-VG-PMFLYVCERLIRFVRSQQKVVI 296  
 Dr-Nox2 -----NVTDCPVP IFAGNPPKTWKWV-VG-PMFLYVCERLIRFVRSQQKVVI 295  
 Hs-Nox3 -----VAQCPVPQFSGKEPSAWKWI-LG-PVVLYACERLIRFVRSQQKVVI 295  
 Cf-Nox3 -----MAQCPMPQFSGKEPSAWKWI-LG-PVVLYACERLIRFVRSQQKVVI 295  
 Mm-Nox3 -----AALCPVPQFSGKEPSAWKWA-LG-PVVLYACERLIRFVRSQQKVVI 295  
 Rn-Nox3 -----AASCPVPQFSGKEPSAWKWT-LG-PVVLYACERLIRFVRSQQKVVI 295  
 Gg-Nox3 -----ATQCPVPQFSGNKPVAWKWV-VS-PVVLYICERLIRFVRSQQKVVI 294  
 Ci-Nox2 -----NNCPTVPFAGSPPMTWKWV-IA-PMVLYVICERLIRLVRFNQQVEV 308  
 Sp-Nox2A -----TSAQCEDPVFKDGSAAASYKWW-SG-PLFIYLLERTIRFVRSQQKVVI 308  
 Sp-Nox2B -----CVID-NPPLFAGTPGASWKWC-VT-PLCVYFLERILRIMRTWPDVTI 282  
 Mm-Nox4 -----CLEEP-KFQAHPQTWIIWISGP--LCLYCAERLYRIRSNKPVTI 311  
 Rn-Nox4 -----CLEEP-KFQAHPQTWIIWISGP--LCLYCAERLYRIRSNKPVTI 311  
 Hs-Nox4 -----CMEEP-RFQANFPQTLWISGP--LCLYCAERLYRIRSNKPVTI 311  
 Cf-Nox4 -----CMEEP-RFQANFPQLPMWELTPCTLCLYCDT-CFTSVKLNAPKVI 316  
 Gg-Nox4 -----CSKEP-KFQSHFPETWFIWISGP--LCLYCVERLYRIRSNKPVTI 275  
 Xt-Nox4 -----CTKGP-TFRPHFPETWFIWISGP--LCLYCAERLYRIRSNKPVTI 304  
 Ol-Nox4 -----CKEDA-HFQPHYPQTLWVWISGP--LCLYCVERLYRIRSNKPVTI 289  
 Tr-Nox4 -----CTEEA-HFQGHYPQTLWVWISGP--LCLYCAERFFRYIRSCDPVTI 290  
 Ci-Nox4 -----TTRIFVHGSWVEVMECVQPPPKFSSCRQEAWLWLCAP--LIYVIERIGRHRSSHDVTT 374  
 Ag-Nox -----CEEPP-QFSAGTKRAWIPLVG--LAIYLADISFRYLTSHSERYR 282  
 Pa-NoxA -----GYLGWRWELWT-GG-FYLIERLYREIRAIRETKEI 248  
 Mg-NoxA -----GYLGWRWELWT-GG-FYLLERLYREIRARRETKEI 247  
 Fg-NoxA -----GYLGWRWELWT-GG-AYLLERLWREVRARRSTKI 251  
 An-NoxA -----GYQGWRWELVA-GF-FYLCERLWREIRALRETEI 246  
 Pa-NoxB -----GVF-WQYWMYG-GF-AYLAERVAREIRGRHKTYI 292  
 Fg-NoxB -----GVF-WQFWMYS-GF-CYLAERIAREVGRHRTFI 281  
 Mg-NoxB -----GVF-WQFWMYG-GF-VYMAERIAREVGRHRTFI 296  
 Dd-NoxA -----WKWVIGP-CA-LYIVERLIRLLRSKKTML 242

|          |                                           |      |
|----------|-------------------------------------------|------|
| Dd-NoxB  | -----WMWIIAP-FI-LYSIERLIRIARSKKRIVL       | 417  |
| At-rbohC | -----WHNKTTWMYLVVP--VVLACERLIRAFRSSI---K  | 591  |
| At-rbohG | -----WYKKTWMYLAVP--VALYAYERLIRAFRSSI---R  | 544  |
| At-rbohA | -----WYKKTWMYLMVP--VVLVLCERLIRAFRSSV---E  | 583  |
| At-rbohB | -----WYHKTTWMYLAVP--VLLYAFERLIRAFRPGA---K | 537  |
| At-rbohD | -----WYQKTWMYLAVP--ILLYASERLLRAFSSV---K   | 614  |
| At-rbohF | -----WYVRTWMYLAVP--VLLYGGERTLRYFRSGS---Y  | 625  |
| At-rbohI | -----WYRKTVWMYLAVP--VLLYVGERIFRFRSRL---Y  | 613  |
| At-rbohE | -----WYQKTWMYISVP--LVLYVAERSLRACRSKH---Y  | 603  |
| At-rbohH | -----WYQKTWMYLAVP--MLFYASERLFSRLQEHV---H  | 555  |
| At-rbohJ | -----WYQKTWMYVAIP--MVLASERLFSR-VQEHV---H  | 565  |
| Hs-Nox5  | -----PNFWKWLLVP--GILFFLEKAIG---LAVSRMA    | 416  |
| Cf-Nox5  | -----FWKWLLVP--GTLFFLEKIIGLAVSRMAALC      | 446  |
| Bt-Nox5  | -----FWKWLLVP--GTLFFLEKTIISLAASRMAALH     | 454  |
| Md-Nox5  | -----FWKWLLVP--GLLFFLEKVVGLVLSRMAALS      | 426  |
| Xt-Nox5  | -----FWKWFLVP--GLLFLLEKLFGAAVSRTGDVY      | 436  |
| Tr-Nox5  | -----FWKWFVAP--GFVFLLEKIIGIAVSRMGGLY      | 360  |
| Tn-Nox5  | -----FWKWFVGP--GFVFLLEKIVGIAVSRMGGLH      | 238  |
| Gg-Nox5  | -----FWKWFLVP--GGLFVLEKAVGTAVSRAVGLR      | 409  |
| O1-Nox5  | -----ANFWKWFVVP--GLLFLLEKIVG---IAVSRMG    | 430  |
| Dr-Nox5  | -----ANFWKWFVVP--GVAFLIEKLVG---IAVSRMG    | 313  |
| Sp-Nox5A | -----PRFWYWFVVP--GIIFIVEKLSQTKCVKQARYG    | 427  |
| Sp-Nox5B | -----KYFWIWF IAP--GI IYLAERLVRLQFFRRARFG  | 392  |
| Ag-Nox5  | -----PNFWKWF IVP--GLIYLVERTIR-LVWMRTEHG   | 477  |
| Am-Nox5  | -----PNFWKWF IGP--GLIYLLERIRR-IAWSRSQLG   | 479  |
| Dm-Nox5  | -----PNFWKWFLLP--GLVYIVERALR-FIWMRGEHG    | 482  |
| Dd-NoxC  | -----WKWF IVP--GF-FYTVDRSFRFLKRRTHRVEV    | 807  |
| Mg-NoxC  | -----WLAVP--TILVLTERLVRVGTGFHRIPA         | 450  |
| Fg-NoxC  | -----FLAFP--TLLVLVERTVRVGLGFHRIKA         | 375  |
| Cc-NoxD  | -----WVIPP--LILYAI DRFLRR---RKVSA         | 234  |
| Py-NoxD  | -----WAAGP--MAVYIIDRLMRR---VEQKE          | 229  |
| Xt-Duox1 | -----RFHIFFLVP--ALIYSADKLISLSRKKIQINV     | 1231 |
| Xt-Duox2 | -----KFHVFLMAP--ALIFIRDSLISLRKKTEINV      | 1283 |
| Gg-Duox  | -----RFHIYF IIP--ALIYGADKLISLSRKKVEISV    | 1169 |
| Tr-Duox  | -----RFHIYL IIP--ALLFLLDKLISLSRKKLEIPV    | 1201 |
| Tn-Duox  | -----RFHIYL IIP--ALLFLLDKLISLSRKKLEIPV    | 1352 |
| O1-Duox  | -----RFYIYL IIP--SLLFLLDKLISLSRKKVEIPV    | 1278 |
| Dr-Duox  | -----RFHIYL IIP--GLLFLLDKLISLSRKKVEIPV    | 1229 |
| Mm-Duox2 | -----SFHIYFLVP--AI IYGGDKLVLSRKKVEISV     | 1243 |
| Rn-Duox2 | -----SFHIYFLVP--AI IYVGDKLVLSRKKVEISV     | 1243 |
| Hs-Duox2 | -----TFHIYFLVP--AI IYGGDKLVLSRKKVEISV     | 1274 |
| Cf-Duox2 | -----RFYIYFLVP--ALIYVGDKLVLSRKKVEISV      | 1026 |
| Hs-Duox1 | -----RFHIFFLVP--AI IYGGDKLVLSRKKVEISV     | 1277 |
| Cf-Duox1 | -----RFHIFFLVP--ALIYVGDKLVLSRKKVEISV      | 1278 |
| Rn-Duox1 | -----RFHIFFLVP--AI IYVGDKLVLSRKKVEISV     | 1273 |
| Mm-Duox1 | -----RFHIFFLVP--AI IYVGDKLVLSRKKVEISV     | 1277 |
| Ci-DuoxA | -----FFYYFFLGP--AIIYTLDKLYSVSRKCEISV      | 1302 |
| Ci-DuoxC | -----QFYYFFLVP--GILFTLTKVYYSRKKAYISV      | 1167 |
| Ci-DuoxD | -----SFYYFFLVP--AIIYTFDKLYSVYRKKFQLPV     | 1245 |
| Sp-Duox  | -----FTHYFALGP--IVLFTLTKLVSI SRKKA EIAV   | 1398 |
| Dm-Duox  | -----RFWMFFLGP--GIVYTLDKIVSLRRTKYMALDV    | 1198 |
| Ag-Duox  | -----RFWLF IGP--GIVYTLDKIVSLRRTKYMALDV    | 1199 |
| Am-Duox  | -----RFWIFFVGP--AI IYALDKVVSLRRTKYMALDI   | 1204 |
| Ci-DuoxB | -----VFHFYLVVP--VVIFLIDKMITISRKVKQITV     | 1221 |
| Ce-Duox1 | -----KFGYVVGP--IVLFVIDRIIGLMQYKKEI        | 1218 |

\*\*

|          |                                                               |
|----------|---------------------------------------------------------------|
| Hs-Nox1  | T--KVMHPS-----KVLELQMNKR----GFSMEVG 322                       |
| Cf-Nox1  | T--KVMHPS-----KVLELQMIKR----GFSMEVG 322                       |
| Mm-Nox1  | T--KVMHPS-----NVLELQMRKR----GFSMEVG 321                       |
| Rn-Nox1  | T--KVMHPC-----KVLELQMRKR----GFTMGIG 321                       |
| Gg-Nox1  | S--QVVMHPA-----KVLELQMCKK----GFRMEVG 323                      |
| Xt-Nox1  | KPNHTTMGHP-----KVLEIQMCKR----GFKMEVG 323                      |
| Tn-Nox1  | R--RIVMRPS-----KVLELQLVKS----GFKMEVG 318                      |
| Tr-Nox1  | R--KIVMRPS-----KVLELQLMKR----GFKMEVG 316                      |
| O1-Nox1  | R--KIVIHPS-----KVLELQLRKK----GFKMEVG 321                      |
| Dr-Nox1  | R--KIVIRPS-----KVLELQLVKP----GFSMDVG 320                      |
| Mm-Nox2  | T--KVVTHPF-----KTIELQMKKK----GFKMEVG 322                      |
| Rn-Nox2  | T--KVVTHPF-----KTIELQMKKK----GFKMEVG 322                      |
| Hs-Nox2  | T--KVVTHPF-----KTIELQMKKK----GFKMEVG 322                      |
| Cf-Nox2  | T--KVVTHPF-----KTIELQMKKK----GFKMEVG 322                      |
| Gg-Nox2  | T--KVVTHPF-----KTIELQMKKK----GFKMEVG 322                      |
| Xt-Nox2  | T--KVVTHPF-----KTIELQMKKK----GFKMEVG 322                      |
| Tn-Nox2  | T--KVMHPS-----KTLELRMKRK----GFHMEVG 320                       |
| Tr-Nox2  | T--KVMHPS-----KTLELRMKRK----GFRMEVG 320                       |
| O1-Nox2  | T--KVMHPS-----KTLELRMKKK----GFHMEVG 321                       |
| Dr-Nox2  | T--KVVTHPS-----KTLELRMKKK----GFKMEVG 320                      |
| Hs-Nox3  | T--KVVSHPS-----GVLELHMCKR----NFKMAPG 320                      |
| Cf-Nox3  | T--KVVSHPS-----AVLELHMCKR----DFKMAPG 320                      |
| Mm-Nox3  | T--KVVSHPS-----AVLELHMCKR----DFKMAPG 320                      |
| Rn-Nox3  | T--KVVSHPS-----AVLELHMCKR----DFKMAPG 320                      |
| Gg-Nox3  | T--KVVTHSS-----GVLELHMCKH----GFKMEAG 319                      |
| Ci-Nox2  | L--KVIKHPS-----RVLEIQMRKN----GFFAEVG 333                      |
| Sp-Nox2A | T--KVVKHQS-----KVLELQMKKK----GFKMEAG 333                      |
| Sp-Nox2B | V--QVQHQ-----KVLELRMKCK----GFKMLPG 307                        |
| Mm-Nox4  | IS--VINHPS-----DVMELRMIKE----NFKARPG 336                      |
| Rn-Nox4  | IS--VINHPS-----DVMELRMIKE----NFKARPG 336                      |
| Hs-Nox4  | IS--VMHPS-----DVMEIRMVKE----NFKARPG 336                       |
| Cf-Nox4  | VSN--MINHPS-----DVMEIRMIKE----NFKARPG 342                     |
| Gg-Nox4  | TS--VISHPS-----NVLEVRMIKD----DFRARPG 300                      |
| Xt-Nox4  | VA--VITHPC-----DVVEIRMVKE----KFSARPG 329                      |
| O1-Nox4  | VT--VIRHPC-----DVVELRMLKK----NFRARPG 314                      |
| Tr-Nox4  | VT--VIRHPC-----NVLELQMLKN----KFAARPG 315                      |
| Ci-Nox4  | IVK--FIEHPC-----DVLELRMLYRN----GFSAPKPG 400                   |
| Ag-Nox   | VTT--VQTYAM-----AGHAIHLRLQFCRKAMVKILPG 313                    |
| Pa-NoxA  | T--RVVKHPY-----DVVEIQFNKP----SFKYKAG 273                      |
| Mg-NoxA  | T--RVVRHPYGEFFFLFFLLFGPSMVGFSVLIRDSADVVEIQFNKP----SFKYKAG 299 |
| Fg-NoxA  | T--RVVRHPY-----DVVEIQFNKP----SFKYKAG 276                      |
| An-NoxA  | V--KVVHPY-----DAMEIQFRKP----GFKYKPG 271                       |
| Pa-NoxB  | S--KVIQHPS-----NVCEIQIKKE----HTKTRAG 317                      |
| Fg-NoxB  | S--KVIQHPS-----NVCEIQMKKE----HTKTRAG 306                      |
| Mg-NoxB  | S--KVIQHPS-----NVCEIQIKKE----HTKTRAG 321                      |
| Dd-NoxA  | I--QARIHPS-----RVIEVRMKT-----FKYKPG 267                       |
| Dd-NoxB  | E--KAIMHPS-----KVLELRMKRDN----DNFNFKPG 444                    |
| At-rbohC | AVTIRKVAVYPG-----NVLAIHLSRPQ----NFKYKSG 621                   |
| At-rbohG | TVKVLKMAAYPG-----KVLTLQMSKPT----NFKYMSG 574                   |
| At-rbohA | AVSVLKVAVLPG-----NVLSLHLSRPS----NFRYKSG 613                   |

|          |                                                             |      |
|----------|-------------------------------------------------------------|------|
| At-rbohB | AVKVLKVAVYPG-----NVLSLYMSKPK---GFKYTSG                      | 567  |
| At-rbohD | PVKMIKVAVYPG-----NVLSLHMTKPQ---GFKYKSG                      | 644  |
| At-rbohF | SVRLKVAIYPG-----NVLTLQMSKPT---QFRYKSG                       | 655  |
| At-rbohI | TVEICKVVIYPG-----NVVVL RMSKPT---SFDYKSG                     | 643  |
| At-rbohE | SVKILKVSMLPG-----EVL SLIMSKPP---GFKYKSG                     | 633  |
| At-rbohH | RVNVIKAIVYSG-----NVLALYVTKPP---GFKYKSG                      | 585  |
| At-rbohJ | RVHIKAIVYSG-----NVLALYMTKPQ---GFKYKSG                       | 595  |
| Hs-Nox5  | AVCIMEVNLLPS-----KVTHLLIKRPP---FFHYRPG                      | 446  |
| Cf-Nox5  | IVEVNLLPSKV-----THLLIKRPP---LFHYRPG                         | 473  |
| Bt-Nox5  | IVEVNLLPSKV-----THLLIKRPP---LFHYRPG                         | 481  |
| Md-Nox5  | IVEVNLLSSKV-----THLVISRPP---FFRYKPG                         | 453  |
| Xt-Nox5  | ITEVNLLASKV-----THLVIKRPP---SFQFKPG                         | 463  |
| Tr-Nox5  | IVEVNLLPSKV-----THLVIKRPQ---FFHFKPG                         | 387  |
| Tn-Nox5  | IVEVNLLPSKVRWTHGWPVASHVVP SAMAGRCVCRP-QVTHLVVRRPQ---FFHFKPE | 293  |
| Gg-Nox5  | IVEVHLLPSQV-----THLVIQRPR---SFRFEPG                         | 436  |
| O1-Nox5  | GLYIVEVNLLPS-----KVTHLVIKRPQ---FFHFKPG                      | 460  |
| Dr-Nox5  | GLYIVEVNLLPS-----KVTHLVIKRPP---FFQFKPG                      | 343  |
| Sp-Nox5A | KTYVQEVNLLPS-----GVTHLALTRPN---RFHYKAG                      | 457  |
| Sp-Nox5B | KVYIQKGYVLP A-----NVVQLVIQRPA---KFKFHAG                     | 422  |
| Ag-Nox5  | KTYISSG LLLPS-----KVTHLVIKRPL---HFCFRPG                     | 507  |
| Am-Nox5  | KTYISSG LLLPS-----KVTHLVIKRPP---HFV FHPG                    | 509  |
| Dm-Nox5  | KTYISSG LLLPS-----KVVHLV IKRPH---HFNFRPG                    | 512  |
| Dd-NoxC  | L---DYCLKNE-----RVINLTF SKPP---SFDYKPG                      | 833  |
| Mg-NoxC  | SLKVLDDETVELR-----ATIPSERI-----WKYQAG                       | 477  |
| Fg-NoxC  | TMKVLDKETVEVT-----AIIPSERL-----WKYKAG                       | 402  |
| Cc-NoxD  | VEFLSAENAVLKDG-----DILELRVPKA-----FSYQAG                    | 265  |
| Py-NoxD  | VRMEVSRDVGAIKGN-----SMLCLRLPRS-----FTYEPG                   | 260  |
| Xt-Duox1 | LDIQR LPS-----DVHLEFQRPN---DFDYKSG                          | 1257 |
| Xt-Duox2 | MKADLLPS-----DVTCLRFQRPA---DFDYKSG                          | 1309 |
| Gg-Duox  | VKAELLPS-----GVTHLRFQR PQ---DFDYKSG                         | 1195 |
| Tr-Duox  | VRAELLPS-----GVTHLEFKRPQ---GFVYRSG                          | 1227 |
| Tn-Duox  | VRAELLPS-----GVTHLEIKRPQ---GFVYRSG                          | 1378 |
| O1-Duox  | VRAELLPS-----GVTHLEFKRPS---GFVYRSG                          | 1304 |
| Dr-Duox  | LKAELL S-----DVTMLEFKRPQ---GFVYRSG                          | 1255 |
| Mm-Duox2 | VKAELLPSG-----VTYLQFQRPK---TFEYKSG                          | 1269 |
| Rn-Duox2 | VKAELLPSG-----VTYLQFQRPK---TFEYKSG                          | 1269 |
| Hs-Duox2 | VKAELLPSG-----VTYLQFQR PQ---GFEYKSG                         | 1300 |
| Cf-Duox2 | VKAELLPSG-----VTHLQFQR PQ---GFEYKSG                         | 1052 |
| Hs-Duox1 | VKAELLPSG-----VTHLRFQR PQ---GFEYKSG                         | 1303 |
| Cf-Duox1 | VKAELLPSG-----VTHLQFQR PQ---GFEYKSG                         | 1304 |
| Rn-Duox1 | VKAELLPSG-----VTHLRFQR PQ---GFEYKSG                         | 1299 |
| Mm-Duox1 | VKAELLPSG-----VTHLRFQR PQ---GFEYKSG                         | 1303 |
| Ci-DuoxA | VNAELLPS-----EVTHLEFKRPV---NFNYKAG                          | 1328 |
| Ci-DuoxC | VRAELFPS-----DVTHLEFKRPK---NFDYKAG                          | 1193 |
| Ci-DuoxD | IKAEILPS-----DVVYLEFVRPS---DFYKAG                           | 1271 |
| Sp-Duox  | TRAELLPS-----DVTMLEFKRPQ---GFEYKSG                          | 1424 |
| Dm-Duox  | IDTDLLPS-----DVIKIKFYRPP---NLKYLSG                          | 1224 |
| Ag-Duox  | IETDLLPS-----DVIKIKFYRPP---NLKYLSG                          | 1225 |
| Am-Duox  | IETELLPS-----DVIKIKFYRPP---NLKYLSG                          | 1230 |
| Ci-DuoxB | IKAEALPS-----GVLNLVFKRPV---AFDYQSG                          | 1247 |
| Ce-Duox1 | VNAEILPS-----DIIYIEYRRPR---EFKYKSG                          | 1244 |
| Ce-Duox2 | AHAEILPS-----DIIYIEYRRPR---EFYKSG                           | 1250 |

\* \* \* \* \*

|          | <u>FAD1</u>                   | <u>FAD2</u>                |     |
|----------|-------------------------------|----------------------------|-----|
| Hs-Nox1  | QYIFVNCPSISL--LEWHPFTLTSAP--- | EEDF-FSIHIRAA-GDWTE-----   | 368 |
| Cf-Nox1  | QYIFVNCPSVSY--LEWHPFTLTSAP--- | EEDF-FSVHIRAV-GDWTE-----   | 363 |
| Mm-Nox1  | QYIFVNCPSISF--LEWHPFTLTSAP--- | EEEF-FSVHIRAA-GDWTR-----   | 362 |
| Rn-Nox1  | QYIFVNCPSISF--LEWHPFTLTSAP--- | EEEF-FSIHIRAA-GDWTE-----   | 362 |
| Gg-Nox1  | QYIFVNCPAVSL--LEWHPFTLTSAP--- | EEDF-FSIHIRAA-GDWTE-----   | 364 |
| Xt-Nox1  | QYIFVNCPSVSA--LEWHPFTLTSAP--- | EEDC-FSVHIRSA-GDWTD-----   | 364 |
| Tn-Nox1  | QYVFLNCPAISQ--LEWHPFTLTSAP--- | EEDF-FSVHIRSA-GDWTD-----   | 359 |
| Tr-Nox1  | QYVFLNCPAISQ--LEWHPFTLTSAP--- | EEDF-FSVHIRSA-GDWTD-----   | 357 |
| O1-Nox1  | QYVFLNCPAISQ--LEWHPFTLTSAP--- | EEDF-FSVHIRSA-GDWTD-----   | 362 |
| Dr-Nox1  | QYVFLNCPAISQ--LEWHPFTLTSAP--- | EEDF-FSVHIRSV-GDWTE-----   | 361 |
| Mm-Nox2  | QYIFVKCPKVSQ--LEWHPFTLTSAP--- | EEDF-FSIHIRIV-GDWTE-----   | 363 |
| Rn-Nox2  | QYIFVKCPKVSQ--LEWHPFTLTSAP--- | EEDF-FSIHIRIV-GDWTE-----   | 363 |
| Hs-Nox2  | QYIFVKCPKVSQ--LEWHPFTLTSAP--- | EEDF-FSIHIRIV-GDWTE-----   | 363 |
| Cf-Nox2  | QYIFVKCPKVSQ--LEWHPFTLTSAP--- | EEDF-FSIHIRIV-GDWTE-----   | 363 |
| Gg-Nox2  | QYIFVKCPKVSQ--LEWHPFTLTSAP--- | EEDF-FSIHIRIV-GDWTE-----   | 363 |
| Xt-Nox2  | QYIFVQCPAVSK--LEWHPFTLTSAP--- | EEDF-FSIHIRIV-GDWTE-----   | 363 |
| Tn-Nox2  | QYVFIQCPVSR--LEWHPFTLTSAP---  | EEDY-FSAHIRIV-GDWTD-----   | 361 |
| Tr-Nox2  | QYVFIQCPVSR--LEWHPFTLTSAP---  | EEDY-FSAHIRIV-GDWTD-----   | 361 |
| O1-Nox2  | QYVFIQCPVSR--LEWHPFTLTSAP---  | EEDY-FSAHIRIV-GDWTD-----   | 362 |
| Dr-Nox2  | QYIFMMCPVSR--LEWHPFTLTSAP---  | EEDH-FSVHIRIV-GDWTD-----   | 361 |
| Hs-Nox3  | QYILVQCPAISP--LEWHPFTLTSAP--- | QEDF-FSVHIRAA-GDWTA-----   | 361 |
| Cf-Nox3  | QYILVQCPAISP--LEWHPFTLTSAP--- | QEDF-FSLHIRVA-GDWTE-----   | 361 |
| Mm-Nox3  | QYIFVQCPVSP--LEWHPFTLTSAP---  | QEDF-FSVHIRAS-GDWTE-----   | 361 |
| Rn-Nox3  | QYIFVQCPVSP--LEWHPFTLTSAP---  | QEDF-FSVHIRAS-GDWTE-----   | 361 |
| Gg-Nox3  | QYIFVQCPVSP--LEWHPFTLTSAP---  | QEDF-FSVHIRAS-GDWTE-----   | 361 |
| Ci-Nox3  | QYIFVQCPVSP--LEWHPFTLTSAP---  | QEDF-FSVHIRVA-GDWTA-----   | 360 |
| Sp-Nox2A | QYVFLNCPAISQ--LEWHPFTLTSAP--- | EEDY-FSIHVRIV-GDWTT-----   | 364 |
| Sp-Nox2B | QYIFLKCPVSP--LEWHPFTLTSAP---  | EEDH-FSVHIRVV-GDWTR-----   | 364 |
| Mm-Nox4  | QYIILHCPVSA--LENHPFTLTMCP--   | TETKAT-FGVHFKVV-GDWTE----- | 379 |
| Rn-Nox4  | QYIILHCPVSA--LENHPFTLTMCP--   | TETKAT-FGVHFKVV-GDWTE----- | 379 |
| Hs-Nox4  | QYIILHCPVSA--LENHPFTLTMCP--   | TETKAT-FGVHFKVV-GDWTE----- | 379 |
| Cf-Nox4  | QYIILHCPVSA--LENHPFTLTMCP--   | TETKAT-FGVHFKVV-GDWTE----- | 385 |
| Gg-Nox4  | QYIILHCPVSA--LENHPFTLTMCP--   | TETKAT-FGVHFKVV-GDWTE----- | 344 |
| Xt-Nox4  | QYITLLCPVSA--LETHPFTLTMCP--   | TESKAT-FAIHKVV-GDWTE-----  | 372 |
| O1-Nox4  | QYILLNCPVSP--FENHPFTLTACP--   | TENKQT-FGIHLRIV-GDWTE----- | 357 |
| Tr-Nox4  | QYILLNCPVSP--FENHPFTLTACP--   | TENKQT-FGIHLRIV-GDWTE----- | 358 |
| Ci-Nox4  | QYILLNCPVSP--FENHPFTLTACP--   | TENKQT-FGIHLRIV-GDWTE----- | 443 |
| Ag-Nox   | QYVLLQCPAISP--LEWHPFTLTSAP--- | IEGRND-ITLTIKVR-GDWTE----- | 356 |
| Pa-NoxA  | QWLFLQVPSVSK--YQWHPFTLTSAP--- | YDPY-VSVHVRQV-GDFTR-----   | 314 |
| Mg-NoxA  | QWLFLQVPSVSK--YQWHPFTLTSAP--- | YDPY-VSVHVRQV-GDFTR-----   | 340 |
| Fg-NoxA  | QWLFLQVPSVSK--YQWHPFTLTSAP--- | YDPY-VSVHVRQV-GDFTR-----   | 317 |
| An-NoxA  | QWLFIQVPEVSN--TQWHPFTLTSAP--- | FDDY-VSIHVRQV-GDFTR-----   | 312 |
| Pa-NoxB  | QYIFVQCPVSP--LEWHPFTLTSAP---  | EEDY-LSVHVRQV-GDFTR-----   | 358 |
| Fg-NoxB  | QYIFVQCPVSP--LEWHPFTLTSAP---  | EEDY-LSVHVRQV-GDFTR-----   | 347 |
| Mg-NoxB  | QYIFVQCPVSP--LEWHPFTLTSAP---  | EEDY-LSVHVRQV-GDFTR-----   | 362 |
| Dd-NoxA  | QYVFLNCPAISQ--LEWHPFTLTSAP--- | EEDF-VSCHINVV-GNWTG-----   | 308 |
| Dd-NoxB  | QYVFLNCPAISQ--LEWHPFTLTSAP--- | EEDF-VSCHINVV-GNWTG-----   | 485 |
| At-rbohC | QYVFLNCPAISQ--LEWHPFTLTSAP--- | EEDF-VSCHINVV-GNWTG-----   | 662 |
| At-rbohG | QYVFLNCPAISQ--LEWHPFTLTSAP--- | EEDF-VSCHINVV-GNWTG-----   | 615 |
| At-rbohA | QYVFLNCPAISQ--LEWHPFTLTSAP--- | EEDF-VSCHINVV-GNWTG-----   | 654 |
| At-rbohB | QYVFLNCPAISQ--LEWHPFTLTSAP--- | EEDF-VSCHINVV-GNWTG-----   | 608 |
| At-rbohD | QYVFLNCPAISQ--LEWHPFTLTSAP--- | EEDF-VSCHINVV-GNWTG-----   | 685 |
| At-rbohF | QYVFLNCPAISQ--LEWHPFTLTSAP--- | EEDF-VSCHINVV-GNWTG-----   | 696 |
| At-rbohI | QYVFLNCPAISQ--LEWHPFTLTSAP--- | EEDF-VSCHINVV-GNWTG-----   | 684 |

|          |                                                              |      |
|----------|--------------------------------------------------------------|------|
| At-rbohE | QYIFLQCPTISR--FEWHPFSITSAP---GDDQ-LSVHIRTL-GDWTE-----        | 674  |
| At-rbohH | MYMFVKCPDLSK--FEWHPFSITSAP---GDDY-LSVHIRAL-GDWTT-----        | 626  |
| At-rbohJ | MYMFVKCPDISK--FEWHPFSITSAP---GDEY-LSVHIRAL-GDWTS-----        | 636  |
| Hs-Nox5  | DYLYLNIPTIAR--YEWHPFTISSAPE--QKDT-IWLHIRSQ-GQWTN-----        | 488  |
| Cf-Nox5  | DYLYLNIPTIAR--YEWHPFTISSAP---EQKDTIWLHIRSE-GQWTN-----        | 515  |
| Bt-Nox5  | DYLYLNIPSIAR--YEWHPFTISSAP---EQKDTIWLHIRSQ-GQWTN-----        | 523  |
| Md-Nox5  | DYIYLNIPAIK--YEWHPFTISSAP---EQEDTIWLHIRSQ-GQWTN-----         | 495  |
| Xt-Nox5  | DYIYLNIPVIK--YEWHPFTISSAP---EQADTIWLHIRSL-GQWTN-----         | 505  |
| Tr-Nox5  | DYVYINIPKIAK--YEWHPFTISSAP---EQSDCLWLHIRSM-GQWTNRLYEYFRQLDRQ | 441  |
| Tn-Nox5  | RYVYINIPKIAK--YEWHPFTISSAP---EQSGTCRRRARKPPGLTGTNAPVDPLRFLPR | 348  |
| Gg-Nox5  | DYIYLNIPAIK--YEWHPFSISSAP---EQQDTIWLHIRSL-GQWTT-----         | 478  |
| Ol-Nox5  | DYIYINIPVIK--YEWHPFTISSAPE--QSDT-LWLHVSRM-GQWTN-----         | 502  |
| Dr-Nox5  | DYVYINIPKIAK--YEWHPFTISSAPE--QQET-LWLHIRSM-GQWTN-----        | 385  |
| Sp-Nox5A | DYIFINIPQIAK--YEWHPFTISSAPE--QGGT-ISMHIRSA-GNWTN-----        | 499  |
| Sp-Nox5B | EYIYHNIPSIAS--HEWHPFTISSAPE--QQEY-LTLHIRCV-GHWTK-----        | 464  |
| Ag-Nox5  | DYVFNIPAIK--YEWHPFTLSSAPE--QEDY-IWLHIRGV-GEWTN-----          | 549  |
| Am-Nox5  | DYVFNIPVIK--YEWHPFTISSAPE--QEDY-IWLHIRAV-GEWTN-----          | 551  |
| Dm-Nox5  | DYVFNIPAIK--YEWHPFTISSAPE--QEDY-MWLHIRTV-GEWTN-----          | 554  |
| Dd-NoxC  | QYLLINVPKISK--LQWHPFTMTSSP---LEDK-IYVHIRVT-GNWTK-----        | 874  |
| Mg-NoxC  | QWAYLQVPTISM--WQWHPFTISVCV---GKE-MRMHIKTD-GNWTG-----         | 517  |
| Fg-NoxC  | QYIFLQVPKISF--FQWHPFTVDFCR---GNK-MMLHIKTD-GNWTA-----         | 442  |
| Cc-NoxD  | QYAEVQVFIN--REWHPFTIASAPQ---DKT-MCFYIKAL-GDWTK-----          | 305  |
| Py-NoxD  | QYAEVKVPAISS--VQWHPFTIASAPH---EPE-LVFIKKS-GDWTT-----         | 301  |
| Xt-Duox1 | QWVRIACLDLGT--DEYHPFTLTSAP---HEDT-LSLHIRAV-GPWT-----         | 1298 |
| Xt-Duox2 | QWVRIACLALGT--NEYHPFTLTSAP---HEDI-LSLHIRAA-GPWT-----         | 1350 |
| Gg-Duox  | QWVRIACMLGT--TEYHPFTLTSAP---HEDT-LSLHIRAV-GPWT-----          | 1236 |
| Tr-Duox  | QWVRIACLALGT--DEYHPFTLTSAP---HEDT-LSLHIRAV-GPWT-----         | 1268 |
| Tn-Duox  | QWVRIACLALGA--DEYHPFTLTSAP---HEGT-LSLHIRAV-GPWT-----         | 1419 |
| Ol-Duox  | QWVRIACLMLGA--DEYHPFTLTSAP---HEET-LSLHIRAV-GPWT-----         | 1345 |
| Dr-Duox  | QWVRIACLTLGT--DEYHPFTLTSAP---HEET-LSLHIRAA-GPWT-----         | 1296 |
| Mm-Duox2 | QWVRIACLDLGT--NEYHPFTLTSAP---HEDT-LSLHIRAV-GPWT-----         | 1310 |
| Rn-Duox2 | QWVRIACLSLGT--NEYHPFTLTSAP---HEDT-LSLHIRAV-GPWT-----         | 1310 |
| Hs-Duox2 | QWVRIACLALGT--TEYHPFTLTSAP---HEDT-LSLHIRAV-GPWT-----         | 1341 |
| Cf-Duox2 | QWVRIACLALGT--NEYHPFTLTSAP---HEDT-LSLHIRAV-GPWT-----         | 1093 |
| Hs-Duox1 | QWVRIACLALGT--TEYHPFTLTSAP---HEDT-LSLHIRAA-GPWT-----         | 1344 |
| Cf-Duox1 | QWVRIACLALGT--TEYHPFTLTSAP---HEDT-LSLHIRAA-GPWT-----         | 1345 |
| Rn-Duox1 | QWVRIACLALGT--TEYHPFTLTSAP---HEDT-LSLHIRAA-GPWT-----         | 1340 |
| Mm-Duox1 | QWVRIACLALGT--TEYHPFTLTSAP---HEDT-LSLHIRAA-GPWT-----         | 1344 |
| Ci-DuoxA | QWVRIACLAQSS--NEYHPFTLTSAP---HEDT-LKLHIRAV-GPWTI-----        | 1369 |
| Ci-DuoxC | QWVRIACLAQSS--SEYHPFTLSSAP---HEDT-LKLHIRAV-GPWTR-----        | 1234 |
| Ci-DuoxD | QWVRIACVGLSK--WEYHPFTLSSSP---DEET-LQLHIRAV-GPWTR-----        | 1312 |
| Sp-Duox  | QWVRIACKTLSS--SEYHPFTLTSAP---HEEN-LSLHIRAI-GPWTM-----        | 1465 |
| Dm-Duox  | QWVRLSCTAFRP--HEMHSFTLTSAP---HENF-LSCHIKAQ-GPWTW-----        | 1265 |
| Ag-Duox  | QWVRLSCTEIKP--EEMHSFTLTSAP---HENF-LSCHIKAQ-GPWTW-----        | 1266 |
| Am-Duox  | QWVRLSCTAFRS--NEFHSFTLTSAP---HENF-LSCHIKAQ-GPWTW-----        | 1271 |
| Ci-DuoxB | QWVRIASLSLGT--NEYHPFTLTSAP---HERY-LSLHIRSV-GPWTW-----        | 1288 |
| Ce-Duox1 | QWVTVSSPSISCTFNESHAFSIASS---QDEN-MKLYIKAV-GPWTW-----         | 1287 |
| Ce-Duox2 | QWVTVSSPSISCTFNESHAFSIASS---QDEN-MKLYIKAV-GPWTS-----         | 1293 |

\*                    \*   \*   \*   \*   \*                    \*   \*   \*   \*   \*   \*

|         |       |
|---------|-------|
| Hs-Nox1 | ----- |
| Cf-Nox1 | ----- |
| Mm-Nox1 | ----- |

|          |       |
|----------|-------|
| Rn-Nox1  | ----- |
| Gg-Nox1  | ----- |
| Xt-Nox1  | ----- |
| Tn-Nox1  | ----- |
| Tr-Nox1  | ----- |
| O1-Nox1  | ----- |
| Dr-Nox1  | ----- |
| Mm-Nox2  | ----- |
| Rn-Nox2  | ----- |
| Hs-Nox2  | ----- |
| Cf-Nox2  | ----- |
| Gg-Nox2  | ----- |
| Xt-Nox2  | ----- |
| Tn-Nox2  | ----- |
| Tr-Nox2  | ----- |
| O1-Nox2  | ----- |
| Dr-Nox2  | ----- |
| Hs-Nox3  | ----- |
| Cf-Nox3  | ----- |
| Mm-Nox3  | ----- |
| Rn-Nox3  | ----- |
| Gg-Nox3  | ----- |
| Ci-Nox2  | ----- |
| Sp-Nox2A | ----- |
| Sp-Nox2B | ----- |
| Mm-Nox4  | ----- |
| Rn-Nox4  | ----- |
| Hs-Nox4  | ----- |
| Cf-Nox4  | ----- |
| Gg-Nox4  | ----- |
| Xt-Nox4  | ----- |
| O1-Nox4  | ----- |
| Tr-Nox4  | ----- |
| Ci-Nox4  | ----- |
| Ag-Nox   | ----- |
| Pa-NoxA  | ----- |
| Mg-NoxA  | ----- |
| Fg-NoxA  | ----- |
| An-NoxA  | ----- |
| Pa-NoxB  | ----- |
| Fg-NoxB  | ----- |
| Mg-NoxB  | ----- |
| Dd-NoxA  | ----- |
| Dd-NoxB  | ----- |
| At-rbohC | ----- |
| At-rbohG | ----- |
| At-rbohA | ----- |
| At-rbohB | ----- |
| At-rbohD | ----- |
| At-rbohF | ----- |
| At-rbohI | ----- |
| At-rbohE | ----- |
| At-rbohH | ----- |
| At-rbohJ | ----- |
| Hs-Nox5  | ----- |

|          |                                                             |     |
|----------|-------------------------------------------------------------|-----|
| Cf-Nox5  | -----                                                       |     |
| Bt-Nox5  | -----                                                       |     |
| Md-Nox5  | -----                                                       |     |
| Xt-Nox5  | -----                                                       |     |
| Tr-Nox5  | VSTKRLSVTLRKHRLPKAKVHTDTQRHLRPVAQLFTLTCVSSPQDEVFSSAKSNKAVAN | 503 |
| Tn-Nox5  | -----TPQLGGVLGGE-----                                       | 359 |
| Gg-Nox5  | -----RLYEFFRQPEPLQPHGNLERKGGGSGCRWVSAGLCFLQ-----            | 516 |
| O1-Nox5  | -----                                                       |     |
| Dr-Nox5  | -----                                                       |     |
| Sp-Nox5A | -----                                                       |     |
| Sp-Nox5B | -----                                                       |     |
| Ag-Nox5  | -----                                                       |     |
| Am-Nox5  | -----                                                       |     |
| Dm-Nox5  | -----                                                       |     |
| Dd-NoxC  | -----                                                       |     |
| Mg-NoxC  | -----                                                       |     |
| Fg-NoxC  | -----                                                       |     |
| Cc-NoxD  | -----                                                       |     |
| Py-NoxD  | -----                                                       |     |
| Xt-Duox1 | -----                                                       |     |
| Xt-Duox2 | -----                                                       |     |
| Gg-Duox  | -----                                                       |     |
| Tr-Duox  | -----                                                       |     |
| Tn-Duox  | -----                                                       |     |
| O1-Duox  | -----                                                       |     |
| Dr-Duox  | -----                                                       |     |
| Mm-Duox2 | -----                                                       |     |
| Rn-Duox2 | -----                                                       |     |
| Hs-Duox2 | -----                                                       |     |
| Cf-Duox2 | -----                                                       |     |
| Hs-Duox1 | -----                                                       |     |
| Cf-Duox1 | -----                                                       |     |
| Rn-Duox1 | -----                                                       |     |
| Mm-Duox1 | -----                                                       |     |
| Ci-DuoxA | -----                                                       |     |
| Ci-DuoxC | -----                                                       |     |
| Ci-DuoxD | -----                                                       |     |
| Sp-Duox  | -----                                                       |     |
| Dm-Duox  | -----                                                       |     |
| Ag-Duox  | -----                                                       |     |
| Am-Duox  | -----                                                       |     |
| Ci-DuoxB | -----                                                       |     |
| Ce-Duox1 | -----                                                       |     |
| Ce-Duox2 | -----                                                       |     |

|         |       |  |
|---------|-------|--|
| Hs-Nox1 | ----- |  |
| Cf-Nox1 | ----- |  |
| Mm-Nox1 | ----- |  |
| Rn-Nox1 | ----- |  |
| Gg-Nox1 | ----- |  |
| Xt-Nox1 | ----- |  |
| Tn-Nox1 | ----- |  |



|          |       |
|----------|-------|
| Tr-Nox1  | ----- |
| Ol-Nox1  | ----- |
| Dr-Nox1  | ----- |
| Mm-Nox2  | ----- |
| Rn-Nox2  | ----- |
| Hs-Nox2  | ----- |
| Cf-Nox2  | ----- |
| Gg-Nox2  | ----- |
| Xt-Nox2  | ----- |
| Tn-Nox2  | ----- |
| Tr-Nox2  | ----- |
| Ol-Nox2  | ----- |
| Dr-Nox2  | ----- |
| Hs-Nox3  | ----- |
| Cf-Nox3  | ----- |
| Mm-Nox3  | ----- |
| Rn-Nox3  | ----- |
| Gg-Nox3  | ----- |
| Ci-Nox2  | ----- |
| Sp-Nox2A | ----- |
| Sp-Nox2B | ----- |
| Mm-Nox4  | ----- |
| Rn-Nox4  | ----- |
| Hs-Nox4  | ----- |
| Cf-Nox4  | ----- |
| Gg-Nox4  | ----- |
| Xt-Nox4  | ----- |
| Ol-Nox4  | ----- |
| Tr-Nox4  | ----- |
| Ci-Nox4  | ----- |
| Ag-Nox   | ----- |
| Pa-NoxA  | ----- |
| Mg-NoxA  | ----- |
| Fg-NoxA  | ----- |
| An-NoxA  | ----- |
| Pa-NoxB  | ----- |
| Fg-NoxB  | ----- |
| Mg-NoxB  | ----- |
| Dd-NoxA  | ----- |
| Dd-NoxB  | ----- |
| At-rbohC | ----- |
| At-rbohG | ----- |
| At-rbohA | ----- |
| At-rbohB | ----- |
| At-rbohD | ----- |
| At-rbohF | ----- |
| At-rbohI | ----- |
| At-rbohE | ----- |
| At-rbohH | ----- |
| At-rbohJ | ----- |
| Hs-Nox5  | ----- |
| Cf-Nox5  | ----- |
| Bt-Nox5  | ----- |
| Md-Nox5  | ----- |
| Xt-Nox5  | ----- |

|          |                                                             |     |
|----------|-------------------------------------------------------------|-----|
| Tr-Nox5  | EDDAVTLMMYQQRSSGADVVSAPAPESQVPPEPLLDLSPAERG-----            | 547 |
| Tn-Nox5  | -----                                                       |     |
| Gg-Nox5  | AQRLNRAVCRLQGGLRAVPVGRSAPAARSTQHRLGLSKKGNKHTGDAAIELTSYRRSGA | 576 |
| Ol-Nox5  | -----                                                       |     |
| Dr-Nox5  | -----                                                       |     |
| Sp-Nox5A | -----                                                       |     |
| Sp-Nox5B | -----                                                       |     |
| Ag-Nox5  | -----                                                       |     |
| Am-Nox5  | -----                                                       |     |
| Dm-Nox5  | -----                                                       |     |
| Dd-NoxC  | -----                                                       |     |
| Mg-NoxC  | -----                                                       |     |
| Fg-NoxC  | -----                                                       |     |
| Cc-NoxD  | -----                                                       |     |
| Py-NoxD  | -----                                                       |     |
| Xt-Duox1 | -----                                                       |     |
| Xt-Duox2 | -----                                                       |     |
| Gg-Duox  | -----                                                       |     |
| Tr-Duox  | -----                                                       |     |
| Tn-Duox  | -----                                                       |     |
| Ol-Duox  | -----                                                       |     |
| Dr-Duox  | -----                                                       |     |
| Mm-Duox2 | -----                                                       |     |
| Rn-Duox2 | -----                                                       |     |
| Hs-Duox2 | -----                                                       |     |
| Cf-Duox2 | -----                                                       |     |
| Hs-Duox1 | -----                                                       |     |
| Cf-Duox1 | -----                                                       |     |
| Rn-Duox1 | -----                                                       |     |
| Mm-Duox1 | -----                                                       |     |
| Ci-DuoxA | -----                                                       |     |
| Ci-DuoxC | -----                                                       |     |
| Ci-DuoxD | -----                                                       |     |
| Sp-Duox  | -----                                                       |     |
| Dm-Duox  | -----                                                       |     |
| Ag-Duox  | -----                                                       |     |
| Am-Duox  | -----                                                       |     |
| Ci-DuoxB | -----                                                       |     |
| Ce-Duox1 | -----                                                       |     |
| Ce-Duox2 | -----                                                       |     |

|         |       |
|---------|-------|
| Hs-Nox1 | ----- |
| Cf-Nox1 | ----- |
| Mm-Nox1 | ----- |
| Rn-Nox1 | ----- |
| Gg-Nox1 | ----- |
| Xt-Nox1 | ----- |
| Tn-Nox1 | ----- |
| Tr-Nox1 | ----- |
| Ol-Nox1 | ----- |
| Dr-Nox1 | ----- |
| Mm-Nox2 | ----- |



|          |       |
|----------|-------|
| Dr-Nox5  | ----- |
| Sp-Nox5A | ----- |
| Sp-Nox5B | ----- |
| Ag-Nox5  | ----- |
| Am-Nox5  | ----- |
| Dm-Nox5  | ----- |
| Dd-NoxC  | ----- |
| Mg-NoxC  | ----- |
| Fg-NoxC  | ----- |
| Cc-NoxD  | ----- |
| Py-NoxD  | ----- |
| Xt-Duox1 | ----- |
| Xt-Duox2 | ----- |
| Gg-Duox  | ----- |
| Tr-Duox  | ----- |
| Tn-Duox  | ----- |
| O1-Duox  | ----- |
| Dr-Duox  | ----- |
| Mm-Duox2 | ----- |
| Rn-Duox2 | ----- |
| Hs-Duox2 | ----- |
| Cf-Duox2 | ----- |
| Hs-Duox1 | ----- |
| Cf-Duox1 | ----- |
| Rn-Duox1 | ----- |
| Mm-Duox1 | ----- |
| Ci-DuoxA | ----- |
| Ci-DuoxC | ----- |
| Ci-DuoxD | ----- |
| Sp-Duox  | ----- |
| Ce-Duox1 | ----- |
| Ce-Duox2 | ----- |
| Dm-Duox  | ----- |
| Ag-Duox  | ----- |
| Am-Duox  | ----- |
| Ci-DuoxB | ----- |

|         |                        |     |
|---------|------------------------|-----|
| Hs-Nox1 | -----NLIRAFEQQYS-----  | 374 |
| Cf-Nox1 | -----NLIRAFEQQCS-----  | 374 |
| Mm-Nox1 | -----NLIRTFEQQHS-----  | 373 |
| Rn-Nox1 | -----NLIRTFEQQHS-----  | 373 |
| Gg-Nox1 | -----HIIDTFQQKL-----   | 375 |
| Xt-Nox1 | -----NLIKVFQEAE-----   | 375 |
| Tn-Nox1 | -----KLIDIMQKLPEG----- | 371 |
| Tr-Nox1 | -----KLIEIMQQLPEG----- | 369 |
| O1-Nox1 | -----QLIDTMQKLPEG----- | 374 |
| Dr-Nox1 | -----KLLKMVENLPEG----- | 373 |
| Mm-Nox2 | -----GLFNACGCDKQE----- | 375 |
| Rn-Nox2 | -----GLFNACGCDKQE----- | 375 |
| Hs-Nox2 | -----GLFNACGCDKQE----- | 375 |
| Cf-Nox2 | -----GLFNACGCDKQE----- | 375 |
| Gg-Nox2 | -----GLFNACGCDKQE----- | 375 |

|          |                                                   |     |
|----------|---------------------------------------------------|-----|
| Xt-Nox2  | -----GLFKACGCDKTE-----                            | 375 |
| Tn-Nox2  | -----ALYEACGGDRSE-----                            | 373 |
| Tr-Nox2  | -----ALYEACGGDKSE-----                            | 373 |
| O1-Nox2  | -----ALYEACGGNKSE-----                            | 374 |
| Dr-Nox2  | -----ALYSACGGDKTA-----                            | 373 |
| Hs-Nox3  | -----ALLEAFGAEGQA-----                            | 373 |
| Cf-Nox3  | -----ALWKAFGAEGQA-----                            | 373 |
| Mm-Nox3  | -----ALLKAFRVEGQA-----                            | 373 |
| Rn-Nox3  | -----ALLKAFGAEGQA-----                            | 373 |
| Gg-Nox3  | -----ALFKAFGAEEKT-----                            | 372 |
| Ci-Nox2  | -----GLSKVLGADEAGN-----                           | 387 |
| Sp-Nox2A | -----DLFKAMGADKPE-----                            | 386 |
| Sp-Nox2B | -----ELAVKMGADQAE-----                            | 360 |
| Mm-Nox4  | -----RFRDLLLPPSSQD-----                           | 392 |
| Rn-Nox4  | -----RFRDLLLPPSSQD-----                           | 392 |
| Hs-Nox4  | -----RFRDLLLPPSSQD-----                           | 392 |
| Cf-Nox4  | -----RFRDLLLPPSNQD-----                           | 398 |
| Gg-Nox4  | -----RFRDLLLHNSQD-----                            | 357 |
| Xt-Nox4  | -----RFYELLESHTAG-----                            | 385 |
| O1-Nox4  | -----HFAHLLLPQPRAA-----                           | 370 |
| Tr-Nox4  | -----RFTQLLLTGSRTD-----                           | 371 |
| Ci-Nox4  | -----ELRDLMVRELNPV-----                           | 456 |
| Ag-Nox   | -----ELYDRIVQREQCK-----                           | 369 |
| Pa-NoxA  | -----ELGNAVGAAGGIHA-----                          | 327 |
| Mg-NoxA  | -----ALGDATGAGAAQA-----                           | 353 |
| Fg-NoxA  | -----ELGDALGAGAAQA-----                           | 330 |
| An-NoxA  | -----ALGDALGCGPAQA-----                           | 325 |
| Pa-NoxB  | -----AVAETLGCEFDKK-----                           | 371 |
| Fg-NoxB  | -----ELAKSLGCDWSKK-----                           | 360 |
| Mg-NoxB  | -----GVSKALGCDWDRK-----                           | 375 |
| Dd-NoxA  | -----KLSTLLNPDKKMG-----                           | 321 |
| Dd-NoxB  | -----KLFKLLNPDNKLK-----                           | 498 |
| At-rbohC | -----ALKGVFSEVC-----                              | 672 |
| At-rbohG | -----AIQGVFSEVS-----                              | 625 |
| At-rbohA | -----QLRSLFSEVC-----                              | 664 |
| At-rbohB | -----QLKSLYSKVC-----                              | 618 |
| At-rbohD | -----KLRTVFSEVC-----                              | 695 |
| At-rbohF | -----ELKRVFSEVC-----                              | 706 |
| At-rbohI | -----GIKKAFSVVC-----                              | 694 |
| At-rbohE | -----ELRRVLTVG-----                               | 683 |
| At-rbohH | -----ELRSRFAKTC-----                              | 636 |
| At-rbohJ | -----ELRNRFETC-----                               | 646 |
| Hs-Nox5  | -----RLYESFKAS-----                               | 497 |
| Cf-Nox5  | -----RLYESFKTSCPMD-----                           | 528 |
| Bt-Nox5  | -----RLFESFKKPEPVF-----                           | 536 |
| Md-Nox5  | -----RLYEYFKAADPIC-----                           | 508 |
| Xt-Nox5  | -----SLYEYFHYPQTVN-----                           | 518 |
| Tr-Nox5  | -----FLQSLEIIIGSATSRSKAQLRNAANKM-----             | 608 |
| Tn-Nox5  | -----GDCTLSSPRLPVAPHPL-----                       | 377 |
| Gg-Nox5  | ISHHSHWAQGSWESGCGECWKLWEQGGGGFPLL-----            | 669 |
| O1-Nox5  | -----RLYEYFRQT-----                               | 511 |
| Dr-Nox5  | -----RLYEYFRQP-----                               | 394 |
| Sp-Nox5A | -----RLYAFFEDR-----                               | 508 |
| Sp-Nox5B | -----RLYDVVRERELTLEHENAGFGEIDKDHDEPLEVIVDVSS----- | 504 |
| Ag-Nox5  | -----RLHNFFEREQERLHN-----GEIPALVAGRVGGAGGPVG----- | 583 |

|          |                                             |      |
|----------|---------------------------------------------|------|
| Am-Nox5  | -----SLYSYFEKEQMKLQR-----DNIFPIEN-----      | 574  |
| Dm-Nox5  | -----RLYRYFEREQKQLQQ-----SGSSQEIPQHMHAIPSPF | 588  |
| Dd-NoxC  | -----KLFRWLSIKKQLQ-----                     | 887  |
| Mg-NoxC  | -----RLRDLAKDAPQ-----                       | 528  |
| Fg-NoxC  | -----KLRELGGDS-----                         | 451  |
| Cc-NoxD  | -----ELRGAFQARVDG-----                      | 317  |
| Py-NoxD  | -----NLHAMFAS-----                          | 309  |
| Xt-Duox1 | -----KLRELYSSKKVENIP-----                   | 1313 |
| Xt-Duox2 | -----RLRELYSPQSV AELGG-----                 | 1366 |
| Gg-Duox  | -----RLRELYSPESLALIGK-----                  | 1252 |
| Tr-Duox  | -----QLRELYAEESVLRGLSE-----                 | 1285 |
| Tn-Duox  | -----RLRELYTQDSLQQ-----                     | 1432 |
| O1-Duox  | -----QLRELYTDESLE-----                      | 1358 |
| Dr-Duox  | -----KLREAYSPEKHQS-----                     | 1309 |
| Mm-Duox2 | -----RLREIYSPVGGT-----                      | 1323 |
| Rn-Duox2 | -----RLREIYSPVGGT-----                      | 1323 |
| Hs-Duox2 | -----RLREIYSSPKGNG-----                     | 1354 |
| Cf-Duox2 | -----RLREYSLPKGDG-----                      | 1106 |
| Hs-Duox1 | -----RLREIYSAPTGDR-----                     | 1357 |
| Cf-Duox1 | -----RLREIYSPPTGDG-----                     | 1358 |
| Rn-Duox1 | -----RLREIYSPPTGDT-----                     | 1353 |
| Mm-Duox1 | -----RLREIYSPPTGDT-----                     | 1357 |
| Ci-DuoxA | -----NLRSIYNPD-VLRDSP-----                  | 1384 |
| Ci-DuoxC | -----NLRNIYDPN-VLRDSP-----                  | 1249 |
| Ci-DuoxD | -----NIRNIYK-----EGEP-----                  | 1323 |
| Sp-Duox  | -----NLRATYDPN-VVREHP-----                  | 1480 |
| Ce-Duox1 | -----KLRESELIRS-LNTGSP-----                 | 1302 |
| Ce-Duox2 | -----KLRESELIRS-LNTGSP-----                 | 1308 |
| Dm-Duox  | -----KLRNYFDPCNYPED-----                    | 1280 |
| Ag-Duox  | -----KLRNYFDPCNYPDD-----                    | 1281 |
| Am-Duox  | -----KLRNYFDPCNYPEDE-----                   | 1287 |
| Ci-DuoxB | -----NLRNLYQTA-VEHQGK-----                  | 1303 |

|         |                     |     |
|---------|---------------------|-----|
| Hs-Nox1 | -----PIP-----       | 377 |
| Cf-Nox1 | -----PIP-----       | 377 |
| Mm-Nox1 | -----PMP-----       | 376 |
| Rn-Nox1 | -----PMP-----       | 376 |
| Gg-Nox1 | -----EMP-----       | 378 |
| Xt-Nox1 | -----NPP-----       | 378 |
| Tn-Nox1 | -----AQQP-----      | 375 |
| Tr-Nox1 | -----AQQP-----      | 373 |
| O1-Nox1 | -----AQQP-----      | 378 |
| Dr-Nox1 | -----GGGPKYVLL----- | 382 |
| Mm-Nox2 | -----FQDAWKLP-----  | 383 |
| Rn-Nox2 | -----FQDAWKLP-----  | 383 |
| Hs-Nox2 | -----FQDAWKLP-----  | 383 |
| Cf-Nox2 | -----FQDAWKLP-----  | 383 |
| Gg-Nox2 | -----FQDAWKLP-----  | 383 |
| Xt-Nox2 | -----FQDAWKMP-----  | 383 |
| Tn-Nox2 | -----PQDAWKLP-----  | 381 |
| Tr-Nox2 | -----PQDAWKLP-----  | 381 |
| O1-Nox2 | -----LQDAWKLP-----  | 382 |

|          |                                                            |     |
|----------|------------------------------------------------------------|-----|
| Dr-Nox2  | -----VLDAWTLP-----                                         | 381 |
| Hs-Nox3  | -----LQEPWSLP-----                                         | 381 |
| Cf-Nox3  | -----LKEPWSLP-----                                         | 381 |
| Mm-Nox3  | -----PSELCSMP-----                                         | 381 |
| Rn-Nox3  | -----PSELCSMP-----                                         | 381 |
| Gg-Nox3  | -----FKELWMLP-----                                         | 380 |
| Ci-Nox2  | -----EVQPSWKMP-----                                        | 396 |
| Sp-Nox2A | -----QQSQDELA-----                                         | 394 |
| Sp-Nox2B | -----PLSITQLP-----                                         | 368 |
| Mm-Nox4  | -----SEILP-----                                            | 397 |
| Rn-Nox4  | -----SEILP-----                                            | 397 |
| Hs-Nox4  | -----SEILP-----                                            | 397 |
| Cf-Nox4  | -----SEILP-----                                            | 403 |
| Gg-Nox4  | -----AEILP-----                                            | 362 |
| Xt-Nox4  | -----TEILP-----                                            | 390 |
| O1-Nox4  | -----LEILP-----                                            | 375 |
| Tr-Nox4  | -----MKTLP-----                                            | 376 |
| Ci-Nox4  | -----VEILKDKIIAGGNFLEKDELSNRGETEYKCPDN                     | 491 |
| Ag-Nox   | -----RNLGG-----                                            | 374 |
| Pa-NoxA  | -----KLY-----                                              | 330 |
| Mg-NoxA  | -----KLY-----                                              | 356 |
| Fg-NoxA  | -----KLY-----                                              | 333 |
| An-NoxA  | -----RDL-----                                              | 328 |
| Pa-NoxB  | -----K-----                                                | 372 |
| Fg-NoxB  | -----KDA-----                                              | 363 |
| Mg-NoxB  | -----G-----                                                | 376 |
| Dd-NoxA  | -----IVQ-----                                              | 324 |
| Dd-NoxB  | -----LIQ-----                                              | 501 |
| At-rbohC | -----KPPPAGVSGLLR-----                                     | 684 |
| At-rbohG | -----KPPVVG-----                                           | 631 |
| At-rbohA | -----KPRPPDEHRLNR-----                                     | 676 |
| At-rbohB | -----QLPSTSQSGLFI-----                                     | 630 |
| At-rbohD | -----KPPTAGKSGLLR-----                                     | 707 |
| At-rbohF | -----EPPVGGKSGLLR-----                                     | 718 |
| At-rbohI | -----HAPEAGKSGLLR-----                                     | 706 |
| At-rbohE | -----KDLSTCVIGRSK-----                                     | 695 |
| At-rbohH | -----EPTQAAAKPKPNSLMRM-----                                | 653 |
| At-rbohJ | -----EPHQKS-KPSPNDLIRM-----                                | 662 |
| Hs-Nox5  | -----DPLGR-GSKRLSRSVTMRKSQRS-----                          | 519 |
| Cf-Nox5  | -----CDPKP-----                                            | 533 |
| Bt-Nox5  | -----CGSKR-----                                            | 541 |
| Md-Nox5  | -----LGAKR-----                                            | 513 |
| Xt-Nox5  | -----RHETKR-----                                           | 524 |
| Tr-Nox5  | -----HLNNFLFKMSFLADEGKQENHSLV-----                         | 632 |
| Tn-Nox5  | -----HGPVDQPPVRVLPGTGE-----                                | 394 |
| Gg-Nox5  | -----LMDAPHLQVSVGPGESQQQLCSIKVSSGERNGVG--                  | 702 |
| O1-Nox5  | -----DSMEL-CSGRLATSLKRRRQAK-----                           | 533 |
| Dr-Nox5  | -----DTQTNKRLTASLRSRRHQSR-----                             | 412 |
| Sp-Nox5A | -----QKRNRDETELLGSASDIRVAMET-----                          | 532 |
| Sp-Nox5B | TKSTTAVEPNGQSIISDTHSNRNGRRSSQTYSKRRRTASGAINSGFEPELNGDKDGTK | 564 |
| Ag-Nox5  | PRAGDATTAGIMKQRHPPGTSKLAMEGYSAPSPVATSTAQP-----AKFERQMSDNRA | 637 |
| Am-Nox5  | -----RNNPNVSESVSMNGKFLSPIPRGNRRS-----FDNSVSVSDD--          | 611 |
| Dm-Nox5  | MLLNERNPATAGERSATPQTDFLAKNLGVAVPPVPRPRQNRKPAPGAPIDPPATGVNR | 648 |
| Dd-NoxC  | -----QQQQLYNNIKQQNVLP-----                                 | 903 |
| Mg-NoxC  | -----                                                      |     |

Fg-NoxC -----  
Cc-NoxD -----  
Py-NoxD -----  
Xt-Duox1 -----  
Xt-Duox2 -----  
Gg-Duox -----  
Tr-Duox -----  
Tn-Duox -----  
O1-Duox -----  
Dr-Duox -----  
Mm-Duox2 -----  
Rn-Duox2 -----  
Hs-Duox2 -----  
Cf-Duox2 -----  
Hs-Duox1 -----  
Cf-Duox1 -----  
Rn-Duox1 -----  
Mm-Duox1 -----  
Ci-DuoxA -----  
Ci-DuoxC -----  
Ci-DuoxD -----  
Sp-Duox -----  
Ce-Duox1 -----  
Ce-Duox2 -----  
Dm-Duox -----  
Ag-Duox -----  
Am-Duox -----  
Ci-DuoxB -----

Hs-Nox1 -----  
Cf-Nox1 -----  
Mm-Nox1 -----  
Rn-Nox1 -----  
Gg-Nox1 -----  
Xt-Nox1 -----  
Tn-Nox1 -----  
Tr-Nox1 -----  
O1-Nox1 -----  
Dr-Nox1 -----  
Mm-Nox2 -----  
Rn-Nox2 -----  
Hs-Nox2 -----  
Cf-Nox2 -----  
Gg-Nox2 -----  
Xt-Nox2 -----  
Tn-Nox2 -----  
Tr-Nox2 -----  
O1-Nox2 -----  
Dr-Nox2 -----  
Hs-Nox3 -----  
Cf-Nox3 -----  
Mm-Nox3 -----



|          |                                                              |     |
|----------|--------------------------------------------------------------|-----|
| Rn-Nox3  | -----                                                        |     |
| Gg-Nox3  | -----                                                        |     |
| Ci-Nox2  | -----                                                        |     |
| Sp-Nox2A | -----                                                        |     |
| Sp-Nox2B | -----                                                        |     |
| Mm-Nox4  | -----                                                        |     |
| Rn-Nox4  | -----                                                        |     |
| Hs-Nox4  | -----                                                        |     |
| Cf-Nox4  | -----                                                        |     |
| Gg-Nox4  | -----                                                        |     |
| Xt-Nox4  | -----                                                        |     |
| O1-Nox4  | -----                                                        |     |
| Tr-Nox4  | -----                                                        |     |
| Ci-Nox4  | SQYLATMASPNQSINKPCMVPNFRTQETDFQMCTL-----                     | 527 |
| Ag-Nox   | -----                                                        |     |
| Pa-NoxA  | -----                                                        |     |
| Mg-NoxA  | -----                                                        |     |
| Fg-NoxA  | -----                                                        |     |
| An-NoxA  | -----                                                        |     |
| Pa-NoxB  | -----                                                        |     |
| Fg-NoxB  | -----                                                        |     |
| Mg-NoxB  | -----                                                        |     |
| Dd-NoxA  | -----                                                        |     |
| Dd-NoxB  | -----                                                        |     |
| At-rbohC | -----                                                        |     |
| At-rbohG | -----                                                        |     |
| At-rbohA | -----                                                        |     |
| At-rbohB | -----                                                        |     |
| At-rbohD | -----                                                        |     |
| At-rbohF | -----                                                        |     |
| At-rbohI | -----                                                        |     |
| At-rbohE | -----                                                        |     |
| At-rbohH | -----                                                        |     |
| At-rbohJ | -----                                                        |     |
| Hs-Nox5  | -----SKGSE-----                                              | 524 |
| Cf-Nox5  | -----                                                        |     |
| Bt-Nox5  | -----                                                        |     |
| Md-Nox5  | -----                                                        |     |
| Xt-Nox5  | -----                                                        |     |
| Tr-Nox5  | -----                                                        |     |
| Tn-Nox5  | -----                                                        |     |
| Gg-Nox5  | -----                                                        |     |
| O1-Nox5  | -----AEVSA-----                                              | 538 |
| Dr-nox5  | -----AQLTAKLSEN--                                            | 424 |
| Sp-Nox5A | -----EEVEETHAGEF                                             | 544 |
| Sp-Nox5B | TVTEGKPYNTGGQNDNESVTQKVNAQLSLPRKADHPSASQGDCQPMSYKELGEVSMILEV | 624 |
| Ag-Nox5  | FKKIQATLQRTFSRRDQLIPRSGGAGGVGGIANEG--FSGDGQKVPLEKLSMPDMQNKF  | 695 |
| Am-Nox5  | -EKITQSPQSVIGNLFKFIQNYLSITDVKKMSNNRKLHLLVSKMPLEKSVSPDMLPGK   | 670 |
| Dm-Nox5  | IRSIKKTLQRTFSRKEAVDPKKGIPNGAFIADGER--EDSNLKQRPLEKSISLPDISVKS | 706 |
| Dd-NoxC  | -----                                                        |     |
| Mg-NoxC  | -----                                                        |     |
| Fg-NoxC  | -----                                                        |     |
| Cc-NoxD  | -----                                                        |     |
| Py-NoxD  | -----                                                        |     |
| Xt-Duox1 | -----                                                        |     |

Xt-Duox2  
Gg-Duox  
Tr-Duox  
Tn-Duox  
O1-Duox  
Dr-Duox  
Mm-Duox2  
Rn-Duox2  
Hs-Duox2  
Cf-Duox2  
Hs-Duox1  
Cf-Duox1  
Rn-Duox1  
Mm-Duox1  
Ci-DuoxA  
Ci-DuoxC  
Ci-DuoxD  
Sp-Duox  
Dm-Duox  
Ag-Duox  
Am-Duox  
Ci-DuoxB  
Ce-Duox1  
Ce-Duox2

Hs-Nox1  
Cf-Nox1  
Mm-Nox1  
Rn-Nox1  
Gg-Nox1  
Xt-Nox1  
Tn-Nox1  
Tr-Nox1  
O1-Nox1  
Dr-Nox1  
Mm-Nox2  
Rn-Nox2  
Hs-Nox2  
Cf-Nox2  
Gg-Nox2  
Xt-Nox2  
Tn-Nox2  
Tr-Nox2  
O1-Nox2  
Dr-Nox2  
Hs-Nox3  
Cf-Nox3  
Mm-Nox3  
Rn-Nox3  
Gg-Nox3  
Ci-Nox2  
Sp-Nox2A

|          |                                                             |     |
|----------|-------------------------------------------------------------|-----|
| Sp-Nox2B | -----                                                       |     |
| Mm-Nox4  | -----                                                       |     |
| Rn-Nox4  | -----                                                       |     |
| Hs-Nox4  | -----                                                       |     |
| Cf-Nox4  | -----                                                       |     |
| Gg-Nox4  | -----                                                       |     |
| Xt-Nox4  | -----                                                       |     |
| O1-Nox4  | -----                                                       |     |
| Tr-Nox4  | -----                                                       |     |
| Ci-Nox4  | -----                                                       |     |
| Ag-Nox   | -----                                                       |     |
| Pa-NoxA  | -----                                                       |     |
| Mg-NoxA  | -----                                                       |     |
| Fg-NoxA  | -----                                                       |     |
| An-NoxA  | -----                                                       |     |
| Pa-NoxB  | -----                                                       |     |
| Fg-NoxB  | -----                                                       |     |
| Mg-NoxB  | -----                                                       |     |
| Dd-NoxA  | -----                                                       |     |
| Dd-NoxB  | -----                                                       |     |
| At-rbohC | -----                                                       |     |
| At-rbohG | -----                                                       |     |
| At-rbohA | -----                                                       |     |
| At-rbohB | -----                                                       |     |
| At-rbohD | -----                                                       |     |
| At-rbohF | -----                                                       |     |
| At-rbohI | -----                                                       |     |
| At-rbohE | -----                                                       |     |
| At-rbohH | -----                                                       |     |
| At-rbohJ | -----                                                       |     |
| Hs-Nox5  | -----                                                       |     |
| Cf-Nox5  | -----                                                       |     |
| Bt-Nox5  | -----                                                       |     |
| Md-Nox5  | -----                                                       |     |
| Xt-Nox5  | -----                                                       |     |
| Tr-Nox5  | -----                                                       |     |
| Tn-Nox5  | -----                                                       |     |
| Gg-Nox5  | -----                                                       |     |
| O1-Nox5  | -----                                                       |     |
| Dr-Nox5  | -----                                                       |     |
| Sp-Nox5A | IRLREMECDAAEADV-----                                        | 559 |
| Sp-Nox5B | NGDSFKMKSLNSRQS-----                                        | 639 |
| Ag-Nox5  | KKRERMMVLREYMRSESESFDEVQIRKARLQSLGLAYLSPQNKSLAQSFYMRNKPTII  | 755 |
| Am-Nox5  | KKNDQLIATQGYRRKQSNN-----LST-----                            | 692 |
| Dm-Nox5  | KKRSRLKALRALGRSESESAFDEKRVRRARNNSVGLAYLSPQNKSLAQSFYMRNKPTII | 766 |
| Dd-NoxC  | -----                                                       |     |
| Mg-NoxC  | -----                                                       |     |
| Fg-NoxC  | -----                                                       |     |
| Cc-NoxD  | -----                                                       |     |
| Py-NoxD  | -----                                                       |     |
| Ci-DuoxA | -----                                                       |     |
| Ci-DuoxC | -----                                                       |     |
| Ci-DuoxD | -----                                                       |     |
| Sp-Duox  | -----                                                       |     |
| Xt-Duox1 | -----                                                       |     |

Xt-Duox2  
Gg-Duox  
Tr-Duox  
Tn-Duox  
O1-Duox  
Dr-Duox  
Mm-Duox2  
Rn-Duox2  
Hs-Duox2  
Cf-Duox2  
Hs-Duox1  
Cf-Duox1  
Rn-Duox1  
Mm-Duox1  
Dm-Duox  
Ag-Duox  
Am-Duox  
Ci-DuoxB  
Ce-Duox1  
Ce-Duox2

Hs-Nox1  
Cf-Nox1  
Mm-Nox1  
Rn-Nox1  
Gg-Nox1  
Xt-Nox1  
Tn-Nox1  
Tr-Nox1  
O1-Nox1  
Dr-Nox1  
Mm-Nox2  
Rn-Nox2  
Hs-Nox2  
Cf-Nox2  
Gg-Nox2  
Xt-Nox2  
Tn-Nox2  
Tr-Nox2  
O1-Nox2  
Dr-Nox2  
Hs-Nox3  
Cf-Nox3  
Mm-Nox3  
Rn-Nox3  
Gg-Nox3  
Ci-Nox2  
Sp-Nox2A  
Sp-Nox2B  
Mm-Nox4  
Rn-Nox4  
Hs-Nox4

|          |                                                              |     |
|----------|--------------------------------------------------------------|-----|
| Cf-Nox4  | -----                                                        |     |
| Gg-Nox4  | -----                                                        |     |
| Xt-Nox4  | -----                                                        |     |
| O1-Nox4  | -----                                                        |     |
| Tr-Nox4  | -----                                                        |     |
| Ci-Nox4  | -----SNSTISVYDNHEMPHQENIDDTCKKTSSTCLSQYSLESESQR              | 571 |
| Ag-Nox   | -----                                                        |     |
| Pa-NoxA  | -----                                                        |     |
| Mg-NoxA  | -----                                                        |     |
| Fg-NoxA  | -----                                                        |     |
| An-NoxA  | -----                                                        |     |
| Pa-NoxB  | -----                                                        |     |
| Fg-NoxB  | -----                                                        |     |
| Mg-NoxB  | -----                                                        |     |
| Dd-NoxA  | -----                                                        |     |
| Dd-NoxB  | -----                                                        |     |
| At-rbohC | -----ADMLHGANN-----                                          | 693 |
| At-rbohG | -----DMLNGANS-----                                           | 639 |
| At-rbohA | -----ADSKHWDYI-----                                          | 685 |
| At-rbohB | -----ADIGQANNI-----                                          | 639 |
| At-rbohD | -----ADGGDGN-----                                            | 714 |
| At-rbohF | -----ADETTKK-----                                            | 725 |
| At-rbohI | -----ADVPNQR-----                                            | 713 |
| At-rbohE | -----FSAYCNIDM-----                                          | 704 |
| At-rbohH | -----ETRAAGVNPHEESQ-----                                     | 668 |
| At-rbohJ | -----ETRARGANPHVEESQ-----                                    | 677 |
| Hs-Nox5  | -----ILLEKHKFCN-----                                         | 534 |
| O1-Nox5  | -----KFAENHRVCN-----                                         | 548 |
| Dr-Nox5  | -----HRYCN-----                                              | 429 |
| Sp-Nox5A | -----VKPTLNHRGANGNLPGLPRGYSVEREESEDNQ                        | 592 |
| Sp-Nox5B | -----IDVQEAPRGSTTKRQSLRVRQSLVGREKRSVCG                       | 672 |
| Ag-Nox5  | AFKTPSLENCEPRDSTNSIVVSPGVFTQKDAEEGRTAGALPTSGAASSVVAVGSGAASAA | 815 |
| Am-Nox5  | -----IQSAAEEGRLQMKFEENSKKN-----HNDI                          | 717 |
| Dm-Nox5  | AFKTPSMEEREHQVAAG---EANGASPASRAEQQLSSRMDSADKQLARLSLSAEGASK   | 823 |
| Cf-Nox5  | -----                                                        |     |
| Bt-Nox5  | -----                                                        |     |
| Md-Nox5  | -----                                                        |     |
| Xt-Nox5  | -----                                                        |     |
| Tr-Nox5  | -----                                                        |     |
| Tn-Nox5  | -----                                                        |     |
| Gg-Nox5  | -----                                                        |     |
| Dd-NoxC  | -----                                                        |     |
| Mg-NoxC  | -----                                                        |     |
| Fg-NoxC  | -----                                                        |     |
| Cc-NoxD  | -----                                                        |     |
| Py-NoxD  | -----                                                        |     |
| Xt-Duox1 | -----                                                        |     |
| Xt-Duox2 | -----                                                        |     |
| Gg-Duox  | -----                                                        |     |
| Tr-Duox  | -----                                                        |     |
| Tn-Duox  | -----                                                        |     |
| O1-Duox  | -----                                                        |     |
| Dr-Duox  | -----                                                        |     |
| Mm-Duox2 | -----                                                        |     |
| Rn-Duox2 | -----                                                        |     |

Hs-Duox2 -----  
 Cf-Duox2 -----  
 Hs-Duox1 -----  
 Cf-Duox1 -----  
 Rn-Duox1 -----  
 Mm-Duox1 -----  
 Ci-DuoxA -----  
 Ci-DuoxC -----  
 Ci-DuoxD -----  
 Sp-Duox -----  
 Dm-Duox -----  
 Ag-Duox -----  
 Am-Duox -----  
 Ci-DuoxB -----  
 Ce-Duox1 -----  
 Ce-Duox2 -----

Hs-Nox1 -----  
 Cf-Nox1 -----  
 Mm-Nox1 -----  
 Rn-Nox1 -----  
 Gg-Nox1 -----  
 Xt-Nox1 -----  
 Tn-Nox1 -----  
 Tr-Nox1 -----  
 OI-Nox1 -----  
 Dr-Nox1 ----- WIFITTS 389  
 Mm-Nox2 -----  
 Rn-Nox2 -----  
 Hs-Nox2 -----  
 Cf-Nox2 -----  
 Gg-Nox2 -----  
 Xt-Nox2 -----  
 Tn-Nox2 -----  
 Tr-Nox2 -----  
 OI-Nox2 -----  
 Dr-Nox2 -----  
 Hs-Nox3 -----  
 Cf-Nox3 -----  
 Mm-Nox3 -----  
 Rn-Nox3 -----  
 Gg-Nox3 -----  
 Ci-Nox2 -----  
 Sp-Nox2A -----  
 Sp-Nox2B -----  
 Mm-Nox4 ----- FIHSRNYP 405  
 Rn-Nox4 ----- FIQSRNYP 405  
 Hs-Nox4 ----- FIQSRNYP 405  
 Cf-Nox4 ----- VIQSRKYP 411  
 Gg-Nox4 ----- IFQQRHYP 370  
 Xt-Nox4 ----- KCQQRKNP 398  
 OI-Nox4 ----- VVHQRRYP 383

|          |                                                             |      |
|----------|-------------------------------------------------------------|------|
| Tr-Nox4  | -----MVQHRKYP                                               | 384  |
| Ci-Nox4  | NLPKSTTLHSKDQQLQNETTLYSEDQRNVPKSTALVSEACSTKNDIHLPCNQTVSKQLP | 631  |
| Ag-Nox   | -----VDPYRRI                                                | 381  |
| Pa-NoxA  | -----EGVDPLG-----MYDVALANGQKMP                              | 350  |
| Mg-NoxA  | -----EGVDPMG-----MYEVALQNGQQMP                              | 376  |
| Fg-NoxA  | -----DDVDPMG-----MYEVALQNGDQMP                              | 353  |
| An-NoxA  | -----EGLDPMG-----MYEVALQNGQQMP                              | 348  |
| Pa-NoxB  | -----GDASKVVGVDQSNDEVPALRRVLP                               | 397  |
| Fg-NoxB  | -----GDASKVVGVTGREAEIDPAIRRVLP                              | 388  |
| Mg-NoxB  | -----DASKVVGVTNGENPDVDPALKRVLP                              | 400  |
| Dd-NoxA  | -----ENVLKSPDG--KP                                          | 335  |
| Dd-NoxB  | -----EDLKSTQNRGKRR                                          | 514  |
| At-rbohC | -----PDFP                                                   | 697  |
| At-rbohG | -----PRFP                                                   | 643  |
| At-rbohA | -----PDFP                                                   | 689  |
| At-rbohB | -----TRFP                                                   | 643  |
| At-rbohD | -----LPFP                                                   | 718  |
| At-rbohF | -----SLP                                                    | 728  |
| At-rbohI | -----SFP                                                    | 716  |
| At-rbohE | -----INRP                                                   | 708  |
| At-rbohH | -----VLFP                                                   | 672  |
| At-rbohJ | -----ALFP                                                   | 681  |
| Hs-Nox5  | -----I                                                      | 535  |
| Cf-Nox5  | -----LSRSLKMRRSQRRPEVSEKS-----SENHLFCNI                     | 562  |
| Bt-Nox5  | -----LSRRLEMKRSQRKPQVSEMS-----SENHQFCNI                     | 570  |
| Md-Nox5  | -----LTQSLKLRRSQRKSQKEGPPSP-----VNENHRFCKI                  | 544  |
| Xt-Nox5  | -----QILTQKNRQHHSQVSANDMKCSY-----DMFNRHQFIDR                | 558  |
| Tr-Nox5  | -----SDLSVTYDIEQILLKTSAHTDTEESVKTSDAHSMTRYRF                | 671  |
| Tn-Nox5  | -----PDLQQHQEADGEPEKAAAAAEGPGFGQVWRQSSVLQHQV                | 433  |
| Gg-Nox5  | -----AVLSRVLALPRAEHPASVGLLSP-----CFWVLSLYLS                 | 735  |
| O1-Nox5  | -----I                                                      | 549  |
| Dr-Nox5  | -----I                                                      | 430  |
| Sp-Nox5A | HQH-----RTIACQTFEMKGAKSWRSSLRE-----EKI                      | 621  |
| Sp-Nox5B | KPN-----GDVNRKMSLVTLRRNGARHSLDLSKDLGGRPHITGL                | 710  |
| Ag-Nox5  | SSN-----PASRPVNYPVG-----KPL                                 | 832  |
| Am-Nox5  | EFD-----SISHSLNYTVG-----KPL                                 | 734  |
| Dm-Nox5  | PLEDQTQTGSPSRKSILRRPTFLRSLASINNRTGGGGGGSTGSSTTNSGGKVTLDAGVM | 883  |
| Dd-NoxC  | -----DGSNFIINNNDIDQIDLEIGLKP                                | 928  |
| Mg-NoxC  | -----GQEVDI                                                 | 534  |
| Fg-NoxC  | -----GESEI                                                  | 456  |
| Cc-NoxD  | -----AVTDSL                                                 | 323  |
| Py-NoxD  | -----TDPTQV                                                 | 315  |
| Xt-Duox1 | -----YP                                                     | 1315 |
| Xt-Duox2 | -----YP                                                     | 1368 |
| Gg-Duox  | -----LP                                                     | 1254 |
| Tr-Duox  | -----GRTEASPLMSMSPSAAVSITHALFPP                             | 1311 |
| Tn-Duox  | -----LGAFP-                                                 | 1437 |
| O1-Duox  | -----LGSYP-                                                 | 1363 |
| Dr-Duox  | -----SEDSQ                                                  | 1314 |
| Mm-Duox2 | -----CARYP                                                  | 1328 |
| Rn-Duox2 | -----SARYP                                                  | 1328 |
| Hs-Duox2 | -----CAGYP                                                  | 1359 |
| Cf-Duox2 | -----CARYP                                                  | 1111 |
| Hs-Duox1 | -----CARYP                                                  | 1362 |
| Cf-Duox1 | -----CAKYP                                                  | 1363 |

|          |       |       |      |
|----------|-------|-------|------|
| Rn-Duox1 | ----- | CARYP | 1358 |
| Mm-Duox1 | ----- | CARYP | 1362 |
| Ci-DuoxA | ----- | YP    | 1386 |
| Ci-DuoxC | ----- | YP    | 1251 |
| Ci-DuoxD | ----- | YP    | 1325 |
| Sp-Duox  | ----- | LP    | 1482 |
| Dm-Duox  | ----- | QP    | 1282 |
| Ag-Duox  | ----- | QP    | 1283 |
| Am-Duox  | ----- | HP    | 1289 |
| Ci-DuoxB | ----- | LP    | 1305 |
| Ce-Duox1 | ----- | FP    | 1304 |
| Ce-Duox2 | ----- | FP    | 1310 |

NADPH1

|          |                                                               |     |
|----------|---------------------------------------------------------------|-----|
| Hs-Nox1  | RIEVDGPFGTASEDFVQYEVAVLVGAGIGVTPFASILKSIWYKFCADHNLK-----      | 429 |
| Cf-Nox1  | RIEVDGPFGTSEDVFQYEVVVLVAGIGVTPFASILKSIWYKFRHEDHNLK-----       | 429 |
| Mm-Nox1  | RIEVDGPFGTSEDVFQYEVAVLVGAGIGVTPFASILKSIWYKFRADNKLK-----       | 428 |
| Rn-Nox1  | RIEVDGPFGTSEDVFQYEVAVLVGAGIGVTPFASFLKSIWYKQRAHNKLK-----       | 428 |
| Gg-Nox1  | RIKVDGPFGTASEDFVLYEVAVLVGAGIGVTPFASILKSIWYRFQNDQTLK-----      | 430 |
| Xt-Nox1  | RLEVDGPFGTASEDFVQYEVSMVLVAGIGVTPFASILKSIWYKFRDDQRLK-----      | 430 |
| Tn-Nox1  | KMGVDGPFGTASEDFDYEVSMVLVAGIGVTPFASILKSIWYKFKESNPCLR-----      | 427 |
| Tr-Nox1  | KMGVDGPFGTASEDFDYEVSMVLVAGIGVTPFASILKSIWYKFKESNPCLR-----      | 425 |
| Ol-Nox1  | KMGVDGPFGTASEDFDYEVSMVLVAGIGVTPFASIMKSIWYKFKECDPKLR-----      | 430 |
| Dr-Nox1  | RMGVDGPFGTASEDFHYEVSMVLVAGIGVTPFASILKSIWYKFKDSDPKLR-----      | 441 |
| Mm-Nox2  | KIAVDGPFGTASEDFVSYEVVMLVAGIGVTPFASILKSVWYKYCDNATSLK-----      | 435 |
| Rn-Nox2  | KIAVDGPFGTASEDFVSYEVVMLVAGIGVTPFASILKSVWYKYCDNATSLR-----      | 435 |
| Hs-Nox2  | KIAVDGPFGTASEDFVSYEVVMLVAGIGVTPFASILKSVWYKYCANNATNLK-----     | 435 |
| Cf-Nox2  | KIAVDGPFGTASEDFVSYEVVMLVAGIGVTPFASILKSVWYKYCANNATNLR-----     | 435 |
| Gg-Nox2  | KIAVDGPFGTASEDFVSYETVMLVAGIGVTPFASVLSVWYKYCHDATNLK-----       | 435 |
| Xt-Nox2  | KIAVDGPFGTASEDFVSYEVAVLVGAGIGVTPFASVLSVWYRYVNDASTLR-----      | 435 |
| Tn-Nox2  | KVAIDGPFGTASEDFVRYEVVMLVAGIGVTPFASILKSVWYKHIQKNQEVF-----      | 433 |
| Tr-Nox2  | KVAIDGPFGTASEDFVRYEVVMLVAGIGVTPFASILKSVWYKHIQNNQEVF-----      | 433 |
| Ol-Nox2  | KVAIDGPFGTASEDFVRYEVVMLVAGIGVTPFASILKSVWYKHIQNNQEVF-----      | 434 |
| Dr-Nox2  | KMAVDGPFGTASEDFVRYEAVMLVAGIGVTPFASVLSVWYKHYQENQNVF-----       | 433 |
| Hs-Nox3  | RLAVDGPFGTALTDVFHYVPCVCAAGIGVTPFAALLKSIWYKCEAQTPLK-----       | 433 |
| Cf-Nox3  | RLAVDGPFGTTLTDVFHYVPSVCAAGIGVTPFASLLKSIWYKC-ESQTQLK-----      | 432 |
| Mm-Nox3  | RLAVDGPFGSLADVFHYVPSVCIATGIGVTPFASLLKSVWYKCCESQSLPE-----      | 433 |
| Rn-Nox3  | RLAVDGPFGSLADVFHYVPSVCIATGIGVTPFASLLKSVWYKCCESQSLPG-----      | 433 |
| Gg-Nox3  | RLVVDGPGYGSATTDVFHYGVSVCAAGIGVTPFASILKSIWYKSCNPNTVLV-----     | 432 |
| Ci-Nox2  | RLAIDGPFGTASEDFVFNYPVAICVSGGIGVTPFASLLKSVWYKLNPEHEMV-----     | 448 |
| Sp-Nox2A | RVAVDGPFGTASIDIFKYQVAICVAGGIGVTPFASILKSIWLKSVNNSASLK-----     | 446 |
| Sp-Nox2B | RVQVDGPFGTSTCIDFDYDVVMCVSAGIGVTPYASTLKSIWISSRQNFCTLH-----     | 420 |
| Mm-Nox4  | KLYIDGPFPGSPFEESLNVEVSLCVAGGIGVTPFASILNTLLDD---WKPYKL-----    | 454 |
| Rn-Nox4  | KLYIDGPFPGSPFEESLNVEVSLCVAGGIGVTPFASILNTLLDD---WKPYKL-----    | 454 |
| Hs-Nox4  | KLYIDGPFPGSPFEESLNVEVSLCVAGGIGVTPFASILNTLLDD---WKPYKL-----    | 454 |
| Cf-Nox4  | KLYIDGPFPGSPFEESLNVEVSLCVAGGIGVTPFASILNTLLDD---WKPYKL-----    | 460 |
| Gg-Nox4  | KLYVDGPFPGSPFEESLNVEVSLCVAGGIGVTPFASVNLALLDG---WKCYKL-----    | 419 |
| Xt-Nox4  | KIYVDGPFPGSPSEEVFNYSLSLCIAGGIGVTPFASVNLRLDLS---WDGYKL-----    | 447 |
| Ol-Nox4  | TLYVDGPFPGSPSEEVFNYSLSLCIAGGIGVTPFACVLNALLIPSE---RWQSFRL----- | 434 |
| Tr-Nox4  | KIYVDGPFPGSPSEEVFNYSLSLCVAGGIGVTPFACMLHTLLDRG---WTHFRL-----   | 434 |
| Ci-Nox4  | ILCVEGPTGGAMEDIFKYKISMCVAGGIGVTPYASVNLALLKDEDLFSRMKL-----     | 683 |
| Ag-Nox   | EFLLDGPPYPSVMSNMLDCKRILFVAGVGTIPFVTIMRLLLS---NVDQP-----       | 429 |
| Pa-Nox4  | ALRIDGPGYGAEDVFENEIAVLIGTGIGVTPWASILKNIWHLRNGPNPPTR-----      | 402 |



|          |                                                                |      |
|----------|----------------------------------------------------------------|------|
| Mg-NoxA  | MLRIDGPGYGAEDVFENEIAVLIGTGIGVTPWASILKNIWHLRNGPNPTR-----        | 428  |
| Fg-NoxA  | ALRIDGPGYGAEDVFENEIAVLIGTGIGVTPWAAAILKNIWHLRNSPNPPRR-----      | 405  |
| An-NoxA  | KLRVDGPGYGAEDVFENEIAVLIGTGIGVTPWASILKNIWHLRASPDPPIRR-----      | 400  |
| Pa-NoxB  | RVYIDGPFPGSASEDFVKYEISVLCGAGIGVTPFASILKSIWYRMNYPQKTR-----      | 449  |
| Fg-NoxB  | RVYVDGPFPGSASEDFVKYEVSVLVGAGIGVTPFASILKSIWYRMNYPQKTR-----      | 440  |
| Mg-NoxB  | RVYVDGPFPGSASEDFVKYEAIVLCGAGIGVTPFASILKSIWYRMNYPQKTR-----      | 452  |
| Dd-NoxA  | ILRIDGPFGAASEEVFKYKQVILVAGIGVTPFASILKHIKYQMARTYNTTP-----       | 387  |
| Dd-NoxB  | ILKIDGPFGAENFFKYRNLVIGAGIGVTPFSSILRHLKNQNDKQTNADENHL-----      | 569  |
| At-rbohC | KVLIDGPGYGAQDYKKEVLLVGLGIGATPMISIVKDIVNNIKAKEQAQLNRME----      | 753  |
| At-rbohG | KIMIDGPGYGAQDYKKEVLLVGLGIGATPMISIKDIINNTETKEQ--LSQME----       | 697  |
| At-rbohA | RILIDGPGYGAQDYKKEVLLVGLGIGATPMISIVSDIINNKGVEEGSNRRQSP----      | 746  |
| At-rbohB | RLRIDGPGYGAQDYKRYDVLLVGLGIGATPLISIIIRDVLNLIKQKQ--SIERG----     | 696  |
| At-rbohD | KVLIDGPGYGAQDYKRYDVLLVGLGIGATPMISILKDIINNMGKPRDRSDIENN----     | 774  |
| At-rbohF | KLLIDGPGYGAQDYKRYDVLLVGLGIGATPFISILKDLLNIVKMEEHADSI-----       | 783  |
| At-rbohI | ELLIDGPGYGAQDHWKYDVLLVGLGIGATPFVILRDLLNIIKQQEQAEICISGSCSN      | 776  |
| At-rbohE | KLLVDGPGYGAQDYRSYDVLLVGLGIGATPFISILKDLLNNSRDEQTDNEFSRSDFSW     | 768  |
| At-rbohH | KIFIKGPGYGAQNYKQFDILLVGLGIGATPFISILKMLNHLKPGIPRSGQKQYEG---     | 729  |
| At-rbohJ | RIFIKGPGYGAQSYKQFDILLVGLGIGATPFISILKMLNHLKPGIPKTGQKQYEG---     | 738  |
| Hs-Nox5  | KCYIDGPGYGTPTTRIFASEHAVLIGAGIGITPFASILQSIMYRHQKRKHCTPCSQHS---  | 592  |
| Cf-Nox5  | KCYIDGPGYGTPTTRIFASEHAVLIGAGIGITPFASILQSIMYR---HQKRKNICPS----  | 615  |
| Bt-Nox5  | KCYIDGPGYGTPTTRIFASEHAVLIGAGIGITPFASILQSIMYR---HQKRKHICPN----  | 623  |
| Md-Nox5  | KCYLDGPGYGTPTTRIFASEHAVLIGAGIGITPFASILQSIMYR---HQKRKHICPN----  | 597  |
| Xt-Nox5  | YCYIDGPGYGTPTTRIFSDHAVLIGAGIGITPFASILQSIMYR---YMRKQNCPS-----   | 611  |
| Tr-Nox5  | QCYVDGPGYGTPTTRIFASEHAILIGAGIGITPFASILQSIMYK---YRRKQNCPN----   | 724  |
| Tn-Nox5  | LRRWD---YGTPTTRIFASEHAILIGAGIGITPFASILQSIMYK---YRRKQNCPN----   | 484  |
| Gg-Nox5  | QCYIDGPGYGTPTTRIFTSEHAVLIGAGIGITPFASILQSIMXQVGPYRQRKQSCPS----  | 791  |
| O1-Nox5  | KCYVDGPGYGTPTTRIFTSEHAVLIGAGIGITPFASILQSIMYRRLRKQNCPCSCNFS---- | 606  |
| Dr-Nox5  | KCYVDGPFGTPTTRIFASEHAILIGAGIGITPFASILQSIMCRYMRKQNCPCNSYS----   | 487  |
| Sp-Nox5A | QVFDGPGYGTATRGIFQAEHAILVAGIGVTPFASILQSIMHRYRVGRQTCPIQHT----    | 678  |
| Sp-Nox5B | EVILDGPGYGAQHIMEAEHAVLIGAGIGITPFASILQSIMERYKAARKHCPCNCHT----   | 767  |
| Ag-Nox5  | EIYIDGPGYAPSSHIFQAQHAILIATGIGVTPFASILQSIMHRYWKARHCCPRCSYE---   | 889  |
| Am-Nox5  | EIFLDGPGYAPSSHIFQAQHAVLIATGIGVTPFASILQSIMHRYWKARHTCPKCKFS---   | 791  |
| Dm-Nox5  | EIFIDGPGYAPSSHIFGAQHAVLIGTGIGVTPFASILQSIMHRYWKARHSCPRCQFE---   | 940  |
| Dd-NoxC  | RINIDGPFSSSQYALKQKQVILVAGIGVSPMASLLKDISLKKQRLQLLNQDQIALEQ      | 988  |
| Mg-NoxC  | EIGINGPFGYGAQRFYDFNHTILVAGIGLTPFSGILADLQAKEDRLHGGPTQKLQEQAE    | 594  |
| Fg-NoxC  | EVGINGPFGYGAQRFYDFNHSIIIGAGIGVTPFSGILADLQYNDLHDGPGNHEVDHHR-    | 515  |
| Cc-NoxD  | QVNIRGPGYGAQHVGLYERVVLISSGGIGSTPFTSICKDLHHRKVKEN-----          | 371  |
| Py-NoxD  | EIKVRGPGYGAQHVGQFENVVLISSGGIGSTPFASVVKSAHN--WMAAS-----         | 362  |
| Xt-Duox1 | KLYLDGPFGEHGEWKNKFEVSVLVGGGIGVTPFASILKDLVFKSSVNSRIHCK-----     | 1368 |
| Xt-Duox2 | KIYLDGPFGEHGEWKNKFEVSVLVGGGIGVTPFASILKDLVFKSSVNSKIACK-----     | 1421 |
| Gg-Duox  | KLYLDGPFGEHGEWHKFEVSVLVGGGIGVTPFASILKDLVFKSSINSKLMCK-----      | 1307 |
| Tr-Duox  | KLYLDGPFGEHGEWDDYEVSILVGGGIGVTPFASILKDLVFKSSAKSKIRCK-----      | 1364 |
| Tn-Duox  | --KADGPFGEHGEWDDYEVSILVGGGIGVTPFTSILKDLVFKSSMKSRIKRCPTVFF---   | 1492 |
| O1-Duox  | KLYLDGPFGEHGEWVDFEVSILVGGGIGVTPFASILKDLVFKSSIKSKFMCK-----      | 1416 |
| Dr-Duox  | KLYLDGPFGEHGEWTDFEVSILVAGIGVTPFASILKDLVFKSSVVKFKFHCK-----      | 1367 |
| Mm-Duox2 | KLYLDGPFGEHGEWHKFEVSVLVGGGIGVTPFASILKDLVFKSSMGSQMLC-----       | 1380 |
| Rn-Duox2 | KLYLDGPFGEHGEWHKFEVSVLVGGGIGVTPFASILKDLVFKSSMGAQMLC-----       | 1380 |
| Hs-Duox2 | KLYLDGPFGEHGEWHKFEVSVLVGGGIGVTPFASILKDLVFKSSLSGSQMLC-----      | 1411 |
| Cf-Duox2 | KLYLDGPFGEHGEWHKFEVSVLVGGGIGVTPFASILKDLVFKSSLSGSQMLC-----      | 1163 |
| Hs-Duox1 | KLYLDGPFGEHGEWHKFEVSVLVGGGIGVTPFASILKDLVFKSSVSCQVFC-----       | 1414 |
| Cf-Duox1 | KLYLDGPFGEHGEWHKFEVSVLVGGGIGVTPFASILKDLVFKSSVSCQVFC-----       | 1415 |
| Rn-Duox1 | KLYLDGPFGEHGEWHKFEVSVLVAGIGVTPFASILKDLVFKSSVSCQVFC-----        | 1410 |
| Mm-Duox1 | KLYLDGPFGEHGEWHKFEVSVLVGGGIGVTPFASILKDLVFKSSVSCQVFC-----       | 1414 |
| Ci-DuoxA | KLYLDGPFGEHGDWYKYDVSVLVGGGIGVTPFASILKDLVSVAQSG--VKIQC-----     | 1438 |
| Ci-DuoxC | KLFLDGPFGEHGDWYKYEVSVLVGGGIGVTPFASILKDLVNSRSQSG--VAITC-----    | 1303 |

|          |                                                             |      |
|----------|-------------------------------------------------------------|------|
| Ci-DuoxD | KLYVDGPFGEHQDWYKYEVAVLVGGGIGVTPFASILKDLVNKSTVG--VGIPC-----  | 1377 |
| Sp-Duox  | KLFLDGPYGEHQDWYQYEVAVLVGGGIGVTPFASILKDIVNKSTIG--ARVTC-----  | 1534 |
| Dm-Duox  | KIRIEGPFGGGNQDWYKFEVAVMVGGGIGVTPYASILNDLVFGTSTNRYSGVAC----- | 1336 |
| Ag-Duox  | KIRIEGPFGGGNQDWYKFEVAVMVGGGIGVTPYASILNDLVFGTSTNRYSGVAC----- | 1337 |
| Am-Duox  | KIRIEGPFGGGNQDWYKFEVAVMVGGGIGVTPYASMLNDLVFGTSTNRYSGVAC----- | 1343 |
| Ci-DuoxB | NLYLDGPFGEHQDWYKYEVSVLVAGIGVTPFASILKDIVNRTSTKKGSHIPC-----   | 1359 |
| Ce-Duox1 | LIHMKGPYGDGNQEWMDYEVAIMVGAGIGVTPYASTLVDLVQRTSSDSFHRVRC----- | 1358 |
| Ce-Duox2 | LIHMKGPYGDGNQEWMNYEVAIMVGAGIGVTPYASTLVDLVQKTSSDSFHRVRC----- | 1364 |

\* \*\*\*\* \* \* \*\*\*\* \* \*

|          |       |
|----------|-------|
| Hs-Nox1  | ----- |
| Cf-Nox1  | ----- |
| Mm-Nox1  | ----- |
| Rn-Nox1  | ----- |
| Gg-Nox1  | ----- |
| Xt-Nox1  | ----- |
| Tn-Nox1  | ----- |
| Tr-Nox1  | ----- |
| O1-Nox1  | ----- |
| Dr-Nox1  | ----- |
| Mm-Nox2  | ----- |
| Rn-Nox2  | ----- |
| Hs-Nox2  | ----- |
| Cf-Nox2  | ----- |
| Gg-Nox2  | ----- |
| Xt-Nox2  | ----- |
| Tn-Nox2  | ----- |
| Tr-Nox2  | ----- |
| O1-Nox2  | ----- |
| Dr-Nox2  | ----- |
| Hs-Nox3  | ----- |
| Cf-Nox3  | ----- |
| Mm-Nox3  | ----- |
| Rn-Nox3  | ----- |
| Gg-Nox3  | ----- |
| Ci-Nox2  | ----- |
| Sp-Nox2A | ----- |
| Sp-Nox2B | ----- |
| Mm-Nox4  | ----- |
| Rn-Nox4  | ----- |
| Hs-Nox4  | ----- |
| Cf-Nox4  | ----- |
| Gg-Nox4  | ----- |
| Xt-Nox4  | ----- |
| O1-Nox4  | ----- |
| Tr-Nox4  | ----- |
| Ci-Nox4  | ----- |
| Ag-Nox   | ----- |
| Pa-NoxA  | ----- |
| Mg-NoxA  | ----- |
| Fg-NoxA  | ----- |
| An-NoxA  | ----- |
| Pa-NoxB  | ----- |

|          |                                                              |     |
|----------|--------------------------------------------------------------|-----|
| Fg-NoxB  | -----                                                        |     |
| Mg-NoxB  | -----                                                        |     |
| Dd-NoxA  | -----                                                        |     |
| Dd-NoxB  | -----                                                        |     |
| At-rbohC | -----NGTSEPQRSKK-----                                        | 764 |
| At-rbohG | -----KGSPQEQGNK-----                                         | 708 |
| At-rbohA | -----IHNMVTPPVSPSRKS-----                                    | 761 |
| At-rbohB | -----TNQHIK-----                                             | 702 |
| At-rbohD | -----NSNNNS-----                                             | 780 |
| At-rbohF | -----DFSRSEYSTGSNGDTPRK-----                                 | 803 |
| At-rbohI | SNIS-----SDHSFSLNSEAASRIPQTR-----                            | 801 |
| At-rbohE | N-----SCTSSYTTATPTSTHG-----                                  | 785 |
| At-rbohH | -----SVGGESIGGDSVSGG-----                                    | 744 |
| At-rbohJ | -----SVGGESLGGSSVYGGSSVNGG-----                              | 759 |
| Hs-Nox5  | -----WIEGVQDN-----                                           | 600 |
| Cf-Nox5  | -----                                                        |     |
| Bt-Nox5  | -----                                                        |     |
| Md-Nox5  | -----                                                        |     |
| Xt-Nox5  | -----                                                        |     |
| Tr-Nox5  | -----                                                        |     |
| Tn-Nox5  | -----                                                        |     |
| Gg-Nox5  | -----                                                        |     |
| O1-Nox5  | -----WCENLKSD-----                                           | 615 |
| Dr-Nox5  | -----WCETIKDNE-----                                          | 496 |
| Sp-Nox5A | -----WLGNIPTDM-----                                          | 687 |
| Sp-Nox5B | -----WVTD-SSSI-----                                          | 775 |
| Ag-Nox5  | -----WSSEIPPTI-----                                          | 898 |
| Am-Nox5  | -----WASEIPPTV-----                                          | 800 |
| Dm-Nox5  | -----WASEIPKSV-----                                          | 949 |
| Dd-NoxC  | SKNE-----                                                    | 992 |
| Mg-NoxC  | KGGDVRGSTSADAPDGRIGTSREAEAMPQRTDVMQAPTSGDQSNNTTLQETADADSDSA  | 654 |
| Fg-NoxC  | -----HDSEATAIPQAARRSDSSSSDEATTSDNVPETPTRQGSGVGPLINKEKQPQADKA | 570 |
| Cc-NoxD  | ----- (TM7-TM10) -----                                       |     |
| Py-NoxD  | ----- (TM7-TM10) -----                                       |     |
| Xt-Duox1 | -----                                                        |     |
| Xt-Duox2 | -----                                                        |     |
| Gg-Duox  | -----                                                        |     |
| Tr-Duox  | -----                                                        |     |
| Tn-Duox  | -----                                                        |     |
| O1-Duox  | -----                                                        |     |
| Dr-Duox  | -----                                                        |     |
| Mm-Duox2 | -----                                                        |     |
| Rn-Duox2 | -----                                                        |     |
| Hs-Duox2 | -----                                                        |     |
| Cf-Duox2 | -----                                                        |     |
| Hs-Duox1 | -----                                                        |     |
| Cf-Duox1 | -----                                                        |     |
| Rn-Duox1 | -----                                                        |     |
| Mm-Duox1 | -----                                                        |     |
| Ci-DuoxA | -----                                                        |     |
| Ci-DuoxC | -----                                                        |     |
| Ci-DuoxD | -----                                                        |     |
| Sp-Duox  | -----                                                        |     |
| Dm-Duox  | -----                                                        |     |
| Ag-Duox  | -----                                                        |     |

Am-Duox -----  
 Ci-DuoxB -----  
 Ce-Duox1 -----  
 Ce-Duox2 -----

NADPH2

Hs-Nox1 -----TKKIYFYWICRETGAFSWFNLLTSLEQEMEELGK-----VG 466  
 Cf-Nox1 -----TQTIYFYWICRETGAFWFNDLLASLECEMEELGK-----VD 466  
 Mm-Nox1 -----TQKIYFYWICRETGAFWFNLLNSLEQEMEELGK-----MD 465  
 Rn-Nox1 -----TQKIYFYWICRETGAFWFNLLNSLEQEMDELGK-----PD 465  
 Gg-Nox1 -----TKKIYFYWLCRDTGAFWFNDLLASLEQKMAESGK-----AD 467  
 Xt-Nox1 -----TKKIYFYWICRETGSFAWFADLLRSLEQEMICSGK-----DG 467  
 Tn-Nox1 -----TRKIYFYWLCRETHAFEFWFADLLQVLEKEMDERGM-----GD 464  
 Tr-Nox1 -----TRKIYFYWLCRETHAFEFWFADLLQVLEKEMDERGM-----VD 462  
 Ol-Nox1 -----TRKIYFYWLCRETNAFEWFADLLQVLEKEMEERNL-----GD 467  
 Dr-Nox1 -----TKRIYFYWLCRETHAFEFWFADLLQVLEREMEERGM-----RD 478  
 Mm-Nox2 -----LKKIYFYWLCRDTHAFEFWFADLLQLETTQMQRNN-----AN 472  
 Rn-Nox2 -----LKKIYFYWLCRDTHAFE--FADLLQLETTQMQRNN-----AN 471  
 Hs-Nox2 -----LKKIYFYWLCRDTHAFEFWFADLLQLESQMQRNN-----AG 472  
 Cf-Nox2 -----LKKIYFYWLCRDTHAFEFWFADLLQLETTQMQRNN-----AG 472  
 Gg-Nox2 -----LKKIYFYWLCRDTHAFEFWFADLLQSLETTQMQRNN-----AE 472  
 Xt-Nox2 -----LKKIYFYWLCRDTHAFEFWFADLLQSLETTQMQRDN-----AN 472  
 Tn-Nox2 -----TKKIYFYWLCRPETEAFEFWFADLLQSLEGGMADKGM-----TD 470  
 Tr-Nox2 -----TKKIYFYWLCRPETEAFEFWFADLLQSLEGGMTEKGM-----TD 470  
 Ol-Nox2 -----TKKVRYIRLLRMSSSYLLFTLMVQKKIIRAWDRHR-----GN 471  
 Dr-Nox2 -----TKKIYFYWLCRPETAFAFEWFADLLQSLEKQMSDKNM-----SD 470  
 Hs-Nox3 -----LSKVYFYWICRDARAFEFWFADLLSLETRMSEQGK-----TH 470  
 Cf-Nox3 -----LSKVYFYWICRDPKAFEFWFADLLSLETLMSERGK-----AH 469  
 Mm-Nox3 -----LSKVYFYWICRDAGAFEFWFADLLSLETRMSEQGK-----AH 470  
 Rn-Nox3 -----LSKVYFYWICRDAAFEFWFADLLSLETTMSEQGK-----AH 470  
 Gg-Nox3 -----LQKVYFYWICRDPSTFEWFADLLFLETKMVEKGM-----ND 469  
 Ci-Nox2 -----LKKVYFFWICPETHAFEFWFGDLLKYLERQLTEIGR-----QD 485  
 Sp-Nox2A -----LKKVYFFWICPDTNAFEWFSTLLDSIDTHFTQGGK-----PD 483  
 Sp-Nox2B -----LKRMYFYWICRDTHAFEFWFVLLSSELEILRQIDK-----EH 457  
 Mm-Nox4 -----RRLYFIWVCRDIQSFQWFADLLCVLHNKFWQENR-----PD 490  
 Rn-Nox4 -----RRLYFIWVCRDIQSFQWFADLLYVHLHNKFWQENR-----PD 490  
 Hs-Nox4 -----RRLYFIWVCRDIQSFQWFADLLCMLHNKFWQENR-----PD 490  
 Cf-Nox4 -----RRLYFIWVCRDIQSFQWFADLLCVLHNKFWQENR-----PD 496  
 Gg-Nox4 -----RRLYFIWVCRDVSFRWFADLLCMLHNKLWQENR-----PD 455  
 Xt-Nox4 -----QRLYFVWVCRDIHSFLWFADLLCCLLHRKLWQENR-----PD 483  
 Ol-Nox4 -----QRLYFVWVCRELQSFYWFAELLCALHEKLWQDNR-----PD 470  
 Tr-Nox4 -----QRLYFVWVWVSELQSFYWFAELLCSVHHKLWQENR-----PD 470  
 Ci-Nox4 -----KRLYLWVWVWVSELQSFYWFAELLCSVHHKLWQENR-----PD 719  
 Ag-Nox -----ARVHLVWIARNLETFWFSDIARLQEKFWQNK-----PD 465  
 Pa-NoxA -----LRRVEFIWVCKDTSFQWFADLLSLEEQSAAARVPGS--SGVE 445  
 Mg-NoxA -----LRRVEFLWVCKDTSFQWFADLLSLEEQSAAARVPGS--NGVE 471  
 Fg-NoxA -----LRRVEFIWVCKDTSFQWFADLLSLEEQSAAARVPGS--TGVE 448  
 An-NoxA -----LRRVEFIWVCKDTSFQWFADLLSLEEQSAAARVPGS--S--E 441  
 Pa-NoxB -----LSKVYFFWICRDFGSFEWFRSLLLAIEAQDNDNR----- 483  
 Fg-NoxB -----LSKVYFFWICRDFGSFEWFRSLLLAIEAQDNDNR----- 474  
 Mg-NoxB -----LAKVYFFWICRDFGSFEWFRSLLLAIEAQDNDNR----- 486  
 Dd-NoxA -----LIDKVHFYWICRDRNSFEWFRSLLLAIEAQDNDNR----- 421  
 Dd-NoxB -----KINKIYFIWISRQKNSFQWFTDILAELENDERIDS----- 604

|          |                                                            |      |      |
|----------|------------------------------------------------------------|------|------|
| At-rbohC | -----ESFRTRRAYFYVWVTRREQGSFDWFKNIMNEVAERD-----             | ANR  | 801  |
| At-rbohG | -----ETFKTRRAYFYVWVTKQGTDFWFKNIMNEIAERD-----               | KSK  | 745  |
| At-rbohA | -----ETFRTKRAYFYVWVTRREQGSFDWFKNVMDEVTTETD-----            | RKN  | 798  |
| At-rbohB | -----NYVATKRAYFYVWVTRREQGSLEWVSEVMNEVAEYD-----             | SEG  | 739  |
| At-rbohD | -----KGFKTRKAYFYVWVTRREQGSFEWFKGIMDEISELD-----             | EEG  | 817  |
| At-rbohF | -----RILKTTNAYFYVWVTRREQGSFDWFKGMNEVAELD-----              | QRG  | 840  |
| At-rbohI | -----KTLNNTKNAYFYVWVTRREQGSFDWFKEMNEIADSD-----             | RKG  | 838  |
| At-rbohE | -----GKKKAVKAHFYVWVTRREPGSVFVFRGMVEEISDMD-----             | CRG  | 822  |
| At-rbohH | -----GGKKFPQRAYFFWVWVTRREQASFDWFKGMDDIAEYD-----            | KTH  | 782  |
| At-rbohJ | GSVNGGGSVSGGGRKFPQRAYFYVWVTRREQASFEWFKGMDDIAVYD-----       | KTN  | 808  |
| Hs-Nox5  | -----MKLHKVDFIWINRDQRSFEWVFSLLTKLEMDQAEAAQ-----            | YGR  | 640  |
| Cf-Nox5  | -CQHSWMSAQDEDMKLHKVDFMWINRDQRSFEWVFSLLTKLEMDQAEIS-----     | QEGP | 668  |
| Bt-Nox5  | -CQHSWMESGQDEDMKLHKVDFIWINRDQRSFEWVFSLLTKLEMDQAEET-----    | QVGR | 676  |
| Md-Nox5  | -CHYSWCEDIRD-DFLIFKVDFIWINRDQKSFVWVFSLLTKLEMDQAEIE-----    | HGGH | 649  |
| Xt-Nox5  | -CQYSWCETLKENEMDLRKVDFIWINRDQKFFVWVFSLLTKLELDQADEEPE-----  | ETGR | 666  |
| Tr-Nox5  | -CNYSWCENLKDSMDMLRKVDFIWINRDQKSFVWVFSLLTKLEMDQADEE-----    | PEGR | 777  |
| Tn-Nox5  | -CNYSWCENLKDSMDMLRKVDFIWINRDQKSFVWVFSLLTKLEMDQADEE-----    | PEGR | 537  |
| Gg-Nox5  | -CETVWDE-----DMALTKVDFIWINRDQHFVFLDLLAALELQEEQD-----       | PGGR | 839  |
| Ol-Nox5  | -----MTLRKVDFIWINRDQKSFVWVFSLLTKLEMDQADEEP-----            | EGR  | 655  |
| Dr-Nox5  | -----MKLRKVDFIWINRDQKSFVWVFSLLTKLEMDQADEEP-----            | EGR  | 536  |
| Sp-Nox5A | -----MRLKKVDFIWINRNQNAFEWVFSLLTQLEMEQAQEP-----             | FDR  | 726  |
| Sp-Nox5B | -----LTKTKVDFVWINRDQHSFEWFISLISAIIELEQAQIPA-----           | ADR  | 815  |
| Ag-Nox5  | -----MNLKRVDFVWINRDQRSFEWVFNLLSQLEIEQAELGSA-----           | MER  | 939  |
| Am-Nox5  | -----MHLKRVDFVWINRDQKSFVWVFNLLSQLEMEQAELGDA-----           | MER  | 841  |
| Dm-Nox5  | -----MNLKRVDFVWINRDQRSFEWVFNLLSQLEIEQAELGGA-----           | MER  | 990  |
| Dd-NoxC  | -----ITTKFGLGNLEKVHFFWLNDRDQHSFQWFEDLLIDISTNGNSNLP-----    |      | 1036 |
| Mg-NoxC  | SSISRPFSSSFASDYRRVDFHWMVRDRNHLLWISELLNTVSRSQAWHHRHDAPGEYHL |      | 714  |
| Fg-NoxC  | G-----SFAEDYRRVDFHWMVRERNYLLWLSDLLNDVSMQDWHREHED-----      | KPHL | 618  |
| Cc-NoxD  | -----VDFVWVTPHENDDEWLRSELEPLADG-----                       | T    | 703  |
| Py-NoxD  | -----LDFVWVTPSPEHDAWLVEELLPIRS-----                        | G    | 805  |
| Xt-Duox1 | -----KVYFIWVTRTQRQFEWLTDIIREVEKNDKQ-----                   | E    | 1399 |
| Xt-Duox2 | -----KIYFIWVTRTQRHFVWFADIIREVEENDKC-----                   | D    | 1452 |
| Gg-Duox  | -----KIYFIWVTRTQRQFEWLADIIREVEETDRN-----                   | E    | 1338 |
| Tr-Duox  | -----KVYFIWVTRTQRQFEWVSDIVREVEEMDTQ-----                   | Q    | 1395 |
| Tn-Duox  | -----PNILKVYFIWVTRTQRQFEWVSDIVREVEEMDTQ-----               | E    | 1527 |
| Ol-Duox  | -----KVYFIWVTRTQRQFEWVSDIVREVEEMDTQ-----                   | E    | 1447 |
| Dr-Duox  | -----KVYFLWVTRTQRQFEWVSDIIREVEDMDMQ-----                   | D    | 1398 |
| Mm-Duox2 | -----KKIYFIWVTRTQRQFEWLADIIREVEENDRQ-----                  | D    | 1412 |
| Rn-Duox2 | -----KKIYFIWVTRTQRQFEWLADIIREVEENDSR-----                  | D    | 1412 |
| Hs-Duox2 | -----KKIYFIWVTRTQRQFEWLADIIQEVEENDHQ-----                  | D    | 1443 |
| Cf-Duox2 | -----KKIYFIWVTRTQRQFEWLADIIREVEENDHQ-----                  | D    | 1195 |
| Hs-Duox1 | -----KKIYFIWVTRTQRQFEWLADIIREVEENDHQ-----                  | D    | 1446 |
| Cf-Duox1 | -----KKIYFIWVTRTQRQFEWLADIIREVEENDCQ-----                  | D    | 1447 |
| Rn-Duox1 | -----KKIYFIWVTRTQRQFEWLADIIREVEENDSR-----                  | D    | 1442 |
| Mm-Duox1 | -----KKIYFIWVTRTQRQFEWLADIIREVEENDRQ-----                  | D    | 1446 |
| Ci-DuoxA | -----KKVYFMWITRDQKQYEWLTDIIQEVESKDAS-----                  | D    | 1470 |
| Ci-DuoxC | -----KAVYFIWVTRDQKQYEWLTDIIQEVEGKDKK-----                  | Q    | 1335 |
| Ci-DuoxD | -----KSVYFLWVARDQRQFEWLLDIIIEETEKNDAL-----                 | G    | 1409 |
| Sp-Duox  | -----KKVYFIWVTRTQKHYEWLTDIIRDVEDNDTN-----                  | D    | 1566 |
| Dm-Duox  | -----KKVYFLWICPSHKHFVWFIDVLRDVEKKDVT-----                  | N    | 1368 |
| Ag-Duox  | -----KKVYFLWICPSHKHFVWFIDVLRDVEKKDVT-----                  | N    | 1369 |
| Am-Duox  | -----KKVYFLWICPSHKHFVWFIDVLRDVERKDVT-----                  | D    | 1375 |
| Ci-DuoxB | -----KKIYFIWVTRTQRHFVWLTDIIRELEETAGG-----                  | D    | 1391 |
| Ce-Duox1 | -----RKVYFLWVCSTHKNYEFVVDLKNVEDQARS-----                   | G    | 1390 |
| Ce-Duox2 | -----RKVYFLWVCSSHKNFVWVDMKNVENQAKP-----                    | G    | 1396 |

\* \*\* \* \*\*

NADPH3

|          |                                                               |     |
|----------|---------------------------------------------------------------|-----|
| Hs-Nox1  | FLNYRLFLT-GWDSNIVGHAALNF-----DKA-TDIVTGLKQK---TSFGRPMWDNEF    | 514 |
| Cf-Nox1  | FLNYRLFLT-GWDSNIASHATLNF-----DKA-TDILTGLKQK---TSFGRPMWDNEF    | 514 |
| Mm-Nox1  | FLNYRLFLT-GWDSNIAGHAALNF-----DRA-TDILTGLKQK---TSFGRPMWDNEF    | 513 |
| Rn-Nox1  | FLNYRLFLT-GWDSNIAGHAALNF-----DRA-TDVLTLGLKQK---TSFGRPMWDNEF   | 513 |
| Gg-Nox1  | FLTYRLFLT-GWDSIANNAAALHF-----DTV-TDVTGLRQK---TIFGRPRWDTEF     | 515 |
| Xt-Nox1  | FLNYRLFLT-SWDSKIAGHVVIDF-----DHA-TDVTGLRQK---TSYGRPIWENEF     | 515 |
| Tn-Nox1  | FLTYKLYLT-KWDQSHADHIMVHS-----DQD-IDVVTGLRQK---TYYGRPAWDKEF    | 512 |
| Tr-Nox1  | FLTYKLYLT-KWDDGHVNHKIVYP-----DTD-VDMVTGLRQQ---TNYGRPNWDKEF    | 510 |
| O1-Nox1  | FLTYKLFLT-GWDQGHDTQVIVHF-----DED-TDVVTGLKQK---THYGRPNWDKEF    | 515 |
| Dr-Nox1  | FLTYKLYLT-KWDQSHADHAMVHF-----DKD-TDITGLKQK---THYGRPNWDKEF     | 526 |
| Mm-Nox2  | FLSYNIYLT-GWDESQANHFVAVHH-----DEE-KDVIITGLKQK---TLYGRPNWDNEF  | 520 |
| Rn-Nox2  | FLSYNIYLT-GWDESQANHFVAVHH-----DEE-KDVIITGLKQK---TLYGRPNWDNEF  | 519 |
| Hs-Nox2  | FLSYNIYLT-GWDESQANHFVAVHH-----DEE-KDVIITGLKQK---TLYGRPNWDNEF  | 520 |
| Cf-Nox2  | FLSYNIYLT-GWDESQANHFVAVHH-----DEE-KDVIITGLKQK---TLYGRPNWDNEF  | 520 |
| Gg-Nox2  | FLSYNIYLT-GWDETQATHFVMHH-----EEE-KDVIITGLKQK---TLYGRPNWENEF   | 520 |
| Xt-Nox2  | FLVYNIYLT-GWDESQATAFSLHH-----DQE-KDVIITGLKQK---TLYGRPNWENEF   | 520 |
| Tn-Nox2  | FLSYNIYLT-RWKEKEAAHFRVHH-----EAE-NDPITGLKQK---TLYGKPNWDFEF    | 518 |
| Tr-Nox2  | FLSYNIYLT-RWKEKEAAHFRVHH-----EAE-NDPITGLKQK---TLYGKPNWDFEF    | 518 |
| O1-Nox2  | WLATPVARF-GQLKNQAHLRVVHH-----EDE-NDPITGLKQK---TLYGKPNWDFEF    | 519 |
| Dr-Nox2  | FLSYNIYLT-RWKDAEAAHLRVQY-----EAE-DDPITGLKQK---TRYGKPNWDFEF    | 518 |
| Hs-Nox3  | FLSYHIFLT-GWDENQALHIALHW-----DEN-TDVIITGLKQK---TFYGRPNWDFEF   | 518 |
| Cf-Nox3  | FLSYHIFLT-SWDENQAVHIALHW-----DEN-TDVVTGLKQK---TFYGRPNWDFEF    | 517 |
| Mm-Nox3  | LLSYHIYLT-GWDENQAIHIALHW-----DES-LDVITGLKQK---AFYGRPNWDFEF    | 518 |
| Rn-Nox3  | LLSYHIYLT-GWDEYQAIHIALHW-----DES-LDVITGLKQK---TFYGRPNWDFEF    | 518 |
| Gg-Nox3  | FLSYHIFLT-GWDENQATHIALHY-----DEK-MDVITGLRQK---TFYGRPNWDFEF    | 517 |
| Ci-Nox2  | LIEYHIYLT-TRGWDHKQAKAIYAHE-----EDT-HDVITGLEQK---TNYGRPNWDFEF  | 534 |
| Sp-Nox2A | FLKYIYLSRGWNNTQAKNIYLQE-----EQE-IDAITGLRQK---THYGRPKWDSNF     | 532 |
| Sp-Nox2B | LLSYSIYLT-TRGWDYTAQNIYLMQE-----DRE-IDAVTGLRQK---THYGRPKWDSNF  | 506 |
| Mm-Nox4  | FVNIQLYLSQ--TDGIQK-----II-GEKYHTLNSR---LFIGRPRWKLFF           | 530 |
| Rn-Nox4  | FVNIQLYLSQ--TDGIQK-----II-GEKYHTLNSR---LFIGRPRWKLFF           | 530 |
| Hs-Nox4  | YVNIQLYLSQ--TDGIQK-----II-GEKYHALNSR---LFIGRPRWKLFF           | 530 |
| Cf-Nox4  | YVNIQLYLSQ--TDGIQK-----II-GEKYQALNSR---LFIGRPRWKLFF           | 536 |
| Gg-Nox4  | YINIQLYLSQ--TDGIQK-----II-GEKYQALNSR---LLIGRPRWKLFF           | 495 |
| Xt-Nox4  | YLNQLYLSQ--TNGIQN-----II-GEKYQALNSR---LSIGRPRWKLFF            | 523 |
| O1-Nox4  | YLNKLYVTQ--KDSLQS-----MS-ELRYRPLAAR---LQVGRPKWKLFF            | 510 |
| Tr-Nox4  | YFNMKLYVSQ--TDSLEN-----MS-AK-YRPLTSR---LLVGRPRWKLFF           | 509 |
| Ci-Nox4  | LLSVRLHITG--SNTLQS-----EE-SGDQLLSDIQGCHVAYGRPDVTQVF           | 762 |
| Ag-Nox   | RFWVKLYWTQNYDEHLLA-----EC-FGDMPSIKSR---MHRGRPNWDFEF           | 507 |
| Pa-NoxA  | FLKIHTYLTQKLDMDTTQNIVLNS-----VGSS-VDPLTELKAR---TNFGRPNFGRIF   | 495 |
| Mg-NoxA  | FLKIHTYLTQKLDMDTTQNIVLNS-----VGAA-LDPLTELKSR---TNFGRPNFAKLF   | 521 |
| Fg-NoxA  | FLKIHTYLTQKLDIDTAQNIVLNS-----VGSQ-MDPLTELQSR---TNFGRPDFPRLF   | 498 |
| An-NoxA  | FLRIHIYLTQRLDQDTTNIYVLS-----VGQE-LDPLTELKSR---TNFGRPDFKRLF    | 491 |
| Pa-NoxB  | -IEIHTYLTAKIKVDDATNIMIND-----ANAD-KDTITGLRSP---TNFGRPNWDMIF   | 532 |
| Fg-NoxB  | -IEIHTYLTAKIKADDATNIMIND-----ANAD-KDTITGLRSP---TNFGRPNWDMIF   | 523 |
| Mg-NoxB  | -IEIHTYLTAKIKADDATNIMIND-----ANAD-KDAITGLRAP---TNFGRPNWDMIF   | 535 |
| Dd-NoxA  | FLEIHPYLTGALSQAQIRVVMYGD-----EE-KDLITGFTTP---TQFGRPKWDFEF     | 469 |
| Dd-NoxB  | ILEIHIFLTGALELDYAKIKN-----AQ-KCHITNLHSK---TLFGRPNFRSIF        | 650 |
| At-rbohC | VIEMHNYCTSVYEEGDARSALIHMLQSLNHAKNG-VDIVSGTRVM---SHFAKPNWRNVY  | 857 |
| At-rbohG | VIELHNHCTSVYEEGDVRSALIRMLQSLNYAKNG-LDIVAGTRVM---SHFARPNWKNVY  | 801 |
| At-rbohA | VIELHNYCTSVYEEGDARSALITMLQSLNHAKHG-VDVVSIGTRVM---SHFARPNWRSVF | 854 |
| At-rbohB | MIELHNYCTSVYEEGDARSALITMLQSLHAKSG-IDIVSGTRVR---THFARPNWRSVF   | 795 |

At-rbohD I IELHNYCTSVYEEGDARVALIAMLQSLQHAKNG-VDVVSGTRVK---SHFAKPNWRQVY 873  
 At-rbohF V IEMHNYLTSVYEEGDARSALITMVQALNHAKNG-VDIVSGTRVR---THFARPNWKKVL 896  
 At-rbohI V IEMHNYLTSVYEEGDTRSNLLTMIQTLNHAKNG-VDIFSGTKVR---THFGRPKWKKVL 894  
 At-rbohE Q IELHNYLTSVYDEGDARSTLIKVMQALNHAKHG-VDILSGTRVR---THFARPNWKEVF 878  
 At-rbohH V IEMHNYLTSMYEAGDARSALIAMVQKLQHAHNG-VDIVSESRH----- 825  
 At-rbohJ V IEMHNYLTSMYEAGDARSALIAMVQKLQHAHNG-VDIVSESRIR---THFARPNWRKVF 864  
 Hs-Nox5 F LELHMYMTSALGKNDMKAIGLQMALDILLAKKEK-KDSITGLQTR---TQPGRPDWSKVF 696  
 Cf-Nox5 F LELHMYMTSALGKNDMKAIGLQMALDILLAKKEK-KDSITGLQTR---TQPGRPDWNKVF 724  
 Bt-Nox5 F LELHMYMTSALSKNDIKAIIGLQMALDILLAKKEK-KDSITGLQTR---TQPGRPDWNKVF 732  
 Md-Nox5 F LELHMYMTSALSKNDMKAIGLQMALDILLAKKEN-KDSITGLKTR---TQPGRPDWSKVF 705  
 Xt-Nox5 F LEMHMYMTSALSKNDMKAIGLQMALDILLAKKEK-KDSITGLRTR---TQPGRPDWNKVF 722  
 Tr-Nox5 F LEMHMYMTSALSKNDMKAIGLQMALDILLAKKEK-RDSITGMRTR---TQPGRPDWGKLF 833  
 Tn-Nox5 F LEMHMYMTSALSKNDMKAIGLQMALDILLAKKEK-RDSITGLRTR---TQPGRPDWGV- 592  
 Gg-Nox5 F LELHLYMTSALGRSDVKAVGLQALDILLAAKEQ-RDSITGLRTR---TQPGRPDWSQVL 895  
 Ol-Nox5 F LEMHMYMTSALSKNDMKAIGLQMALDILLAKKEK-KDSITGLRTR---TQPGRPEWGVKVF 711  
 Dr-Nox5 F LEMHMYMTSALSKNDMKAIGLQMALDILLAKKEK-RDSITGLRTR---TQPGRPDWAKVF 592  
 Sp-Nox5A F LELHMYMTSAMAKNDMKGIGLQMALDIMHKKGH-RDLITGLKTR---TQPGRPDWNKIF 782  
 Sp-Nox5B F LDHLYMTSALSPSDMKAIGLHVALDLIHKKKK-RDLITGLKTR---TQAGRPDWEDEV 871  
 Ag-Nox5 F LEMHMYITSALQKTDMAVGLQALDILLHEKEK-RDLITGLKTR---TNAGRPNWDKVF 995  
 Am-Nox5 F LEMHMYITSALQKSDMKAIVTLQALMDLVHMEK-RDLITGLKTR---TNAGRPNWDKVF 897  
 Dm-Nox5 F LDMHMYITSALQRTDMAVGLQALDILLHEKGG-RDLITGLKTR---TNAGRPNWDKVF 1046  
 Dd-NoxC K I SINTFNTRVFPKNDVRFVWNLGDKLFKAQG-LDPTTNLPPK---THWGRPNWDTIF 1092  
 Mg-NoxC D I RMQTHVTQKRKNVSTHVYRWL----EQHRTPEHPASPITGLINPTQFGRPDFVSI 769  
 Fg-NoxC D I RINTHVTAQKKISTHVYRWL----EMHRTDEHPASPLTGLLNPTHFGRPDFLIL 673  
 Cc-NoxD E LKLRHYVTR-AKEVD-----MEAGS-EFITS-----SNTGRPEWDAIF 740  
 Py-NoxD T VRLHRHITRSAAEVPEP-----WMLDYD-EVPLK-----TTYKRPDWAEIF 845  
 Xt-Duox1 L LSVHIYITQLAEKFDLRTTMLYICEQHFQKVLN-QSLMTGLRSV---THFGRPPFAGFF 1455  
 Xt-Duox2 L VSVHIYITQLAEKFDLRTTMLYICERHFQKVLN-RSLFTGLRSI---THFGRPPFQFF 1508  
 Gg-Duox L VSVHIYITQLAEKFDLRTTMLYICERHFQKVLN-KSLFTGLRSI---THFGRPPFIPFF 1394  
 Tr-Duox L VSVHTYITQVAEKFDLRTTMLYVCERRFQKVVN-RSLFTGLRSV---THFGRPPFSLFF 1451  
 Tn-Duox L VSVHTYITQVAEKFDLRTTMLYVCERHFQKVVN-RSLFTGLRSV---THFGRPPFSLFF 1583  
 Ol-Duox L VSVHTYITQVAEKFDLRTTMLYVCERHFQKVVN-RSLFTGLRSV---THFGRPPFVSLFF 1503  
 Dr-Duox L VSVHIYITQLPEKFDLRTTMLYVCERHFQKVVN-RSLFTGLRSV---THFGRPPFLAFL 1454  
 Mm-Duox2 L VSVHIYITQLAEKFDLRTTMLYICERHFQKALN-RSLFTGLRSI---THFGRPPFELFF 1468  
 Rn-Duox2 L VSVHIYITQLAEKFDLRTTMLYICERHFQKVLN-RSLFTGLRSV---THFGRPPFELFL 1468  
 Hs-Duox2 L VSVHIYITQLAEKFDLRTTMLYICERHFQKVLN-RSLFTGLRSI---THFGRPPFEPFF 1499  
 Cf-Duox2 L VSVHIYITQLAEKFDLRTTMLYICERHFQKVLN-RSLFTGLRSI---THFGRPPFEPFF 1251  
 Hs-Duox1 L VSVHIYITQLAEKFDLRTTMLYICERHFQKVLN-RSLFTGLRSI---THFGRPPFEPFF 1502  
 Cf-Duox1 L VSVHIYITQLAEKFDLRTTMLYICERHFQKVLN-RSLFTGLRSI---THFGRPPFEPFF 1503  
 Rn-Duox1 L VSVHIYITQLAEKFDLRTTMLYICERHFQKVLN-RSLFTGLRSV---THFGRPPFEPFF 1498  
 Mm-Duox1 L VSVHIYITQLAEKFDLRTTMLYICERHFQKVLN-RSLFTGLRSI---THFGRPPFEPFF 1502  
 Ci-DuoxA L LDTHIFITQFPQKFDLRTTMLYICERHFQKQVAG-KSLFTGLRAVT---HFGRPEFKSFF 1526  
 Ci-DuoxC I LNTHIFITQFPQKFDLRTKMLYICEENFQKIAG-KSLFTGLRAIT---HFGRPDPPDF 1391  
 Ci-DuoxD I LSTHIFITEIPNKFDLRTTMLYVCEQHFQKQVSE-KSMFTGLNAV---HFGRPNPDDL 1465  
 Sp-Duox L VSVHIFVTQFFQKFDLRTTMLYICERHFQKISN-RSLFTGLKSI---HFGRPQTSFL 1622  
 Dm-Duox V LEIHIFITQFFHKFDLRTTMLYICENHFQRLSK-TSIFTGLKAVN---HFGRPDMSSFL 1424  
 Ag-Duox V LEIHIFITQFFHKFDLRTTMLYICENHFQRLSK-TSMFTGLKAVN---HFGRPDMSSFL 1425  
 Am-Duox V LEIHIFITQFFHKFDLRTTMLYICENHFQRLSK-KSIFTGLKAIN---HFGRPDMSSFL 1431  
 Ci-DuoxB L VSTHIYITQFANKYDLRTTMLYICERYFQKVAN-KSMFTGLKAIT---HFGRPQFEAFL 1447  
 Ce-Duox1 I LEHIFVTQFHKFDLRTTMLYICEKHFRATNSGISMFTGLHAKN---HFGRPNFKAFF 1447  
 Ce-Duox2 I LEHIFVTQMFHKFDLRTTMLYICEKHFRATNSGISMFTGLHAKN---HFGRPNFKAFF 1453

\*\*\* \*

|          |                           |                              |     |
|----------|---------------------------|------------------------------|-----|
| Hs-Nox1  | STIATSHP-----             | KSVVGVFLCGPRTLAKSLRKCCHRY    | 548 |
| Cf-Nox1  | STIANAHP-----             | RSVVGVFLCGPQLAKSLSKCCCQYS    | 548 |
| Mm-Nox1  | SRIATAHP-----             | KSAVGVFLCGPRTLAKSLRKCQRYS    | 547 |
| Rn-Nox1  | SRIATAHP-----             | KSVVGVFLCGPPTLAKSLRKCRRYS    | 547 |
| Gg-Nox1  | SAVATAHP-----             | RSVVGVFLCGPEALAKVLRRSCHQHS   | 549 |
| Xt-Nox1  | SKVAEWHP-----             | KSTVGVFLCGPQALGKTLKQCCHQYS   | 549 |
| Tn-Nox1  | EQVRKENP-----             | TSVVGTFFLCGPEALAEVLEKCKVKYS  | 546 |
| Tr-Nox1  | EQVRKENP-----             | TSVVGTFFLCGPEALGEVLAKKCGKYS  | 544 |
| O1-Nox1  | DQVRKENP-----             | ASVVGTFFLCGPAALAKVLQKCKAKYS  | 549 |
| Dr-Nox1  | EQVRQENP-----             | SSVVGTFFLCGPQALAKDLEKCKVKYS  | 560 |
| Mm-Nox2  | KTIASEHP-----             | NTTIGVFLCGPEALAEATLSKQISISNS | 554 |
| Rn-Nox2  | KTIASQHP-----             | NTRIGVFLCGPEALAKTSLKQISISNS  | 553 |
| Hs-Nox2  | KTIASQHP-----             | NTRIGVFLCGPEALAEATLSKQISISNS | 554 |
| Cf-Nox2  | KTIASQHP-----             | NTRIGVFLCGPEALAEATLSKQISISNS | 554 |
| Gg-Nox2  | KTIARQHP-----             | GSRIGVFLCGPEGLADTLNKQISISNS  | 554 |
| Xt-Nox2  | KTIANAHT-----             | SSRVGVFLCGPESLAETLNKQISANS   | 554 |
| Tn-Nox2  | ASIASQHP-----             | RSKVGVFLCGPPKLGQSLKQCLSYS    | 552 |
| Tr-Nox2  | TNIASKHP-----             | GSKVGVFLCGPPQLGKSLKQCLSHS    | 552 |
| O1-Nox2  | TNIASTHP-----             | GSKVGVFLCGPPMLGKSLEKESISHT   | 553 |
| Dr-Nox2  | SLIASQHP-----             | GTKVGVFLCGPTALGKALSQCLSHT    | 552 |
| Hs-Nox3  | KQIAYNHP-----             | SSSIGVFFCGPKALSRTLQKMCHLYS   | 552 |
| Cf-Nox3  | RQLAYAHP-----             | SSSIGVFFCGPKALSRTLQRMCHLYS   | 551 |
| Mm-Nox3  | KQIAYNHP-----             | SSSIGVFFCGSKAMSKTLQKMCRLYS   | 552 |
| Rn-Nox3  | KQIAYNHP-----             | SSSIGVFFCGPKAMSKTLQKMCRLYS   | 552 |
| Gg-Nox3  | KQLAENHP-----             | SNSIGVFFCGPKNLKILQKMCSSYS    | 551 |
| Ci-Nox2  | SKTARDYP-----             | NTHIGVFFCGVAALSAKLHKMSNKHS   | 568 |
| Sp-Nox2A | KMIAEENPG----RVS-----     | SVFFCGPKALSSVLHENANKFT       | 566 |
| Sp-Nox2B | SYIAEKNP----RVSRI-----    | WNATIGVFFCGPKSLSTILHQSCNKHT  | 546 |
| Mm-Nox4  | DEIAKCNRGK-----           | TVGVFCCGPSSISKTLHLSNRNN      | 564 |
| Rn-Nox4  | DEIAKCNRGK-----           | TVGVFCCGPSSISKTLHLSNRNN      | 564 |
| Hs-Nox4  | DEIAKYNRGK-----           | TVGVFCCGPNSLTKLHKLNSQNN      | 564 |
| Cf-Nox4  | DEIAKCNRGK-----           | TVGVFCCGPNSISKTLHKLNSRNN     | 570 |
| Gg-Nox4  | DEIAKYNRRK-----           | TIGVFFCCGPKMSKILHKLNSSN      | 529 |
| Xt-Nox4  | EEVAKSSRGK-----           | TVGVFCCGPKGISKELHKLNSAN      | 557 |
| O1-Nox4  | DEIGKSNKDK-----           | RVGVFCCGPKGISRTLHRLNSAK      | 544 |
| Tr-Nox4  | NELGKTNKHK-----           | RIGVFFCCGPKAISRTLHRFCNSFQ    | 543 |
| Ci-Nox4  | EEIRTAAYQR-----           | STVGVFCCGHRLLVSSVKHHCLKTK    | 798 |
| Ag-Nox   | IDLVTLYPKK-----           | SVSVFSCGPKELTKEIRLKCKEYS     | 541 |
| Pa-NoxA  | QSMSEGIQNRTYLNGLEGN-----  | MRTTVGVYFCGPSAAARDIKKAAKAAS  | 541 |
| Mg-NoxA  | ASMRDGIIMDRTYLSGLEGS----- | MKTTVGVYFCGPSAAARDIKAACKTAS  | 567 |
| Fg-NoxA  | TTMRNGILDRTYLNGLSH-----   | IRTTVGVYFCGPSAAARDIKLACKAAT  | 544 |
| An-NoxA  | TAMRNGLDQSYMRLHHT-----    | SRTEIGVYFCGPNVAARQIKAAAASSAS | 537 |
| Pa-NoxB  | RGIRK-----LH-----         | TPAEAGVFFCGPKGLGSQLHVFCNKYS  | 566 |
| Fg-NoxB  | RGIRK-----IH-----         | SPAEGVYFYGPKGLGSSLHTYCNKYT   | 557 |
| Mg-NoxB  | RGIRK-----LH-----         | TPAEAGVFFCGPKGLGSSLHTYCNKYT  | 569 |
| Dd-NoxA  | ADHAL-----RY-----         | AEKDVGVFFCGPKLLSKSLYKASTHYT  | 503 |
| Dd-NoxB  | NQLTQ-----LH-----         | QREKIGVYFCGNKALGKNIKNCNKFN   | 684 |
| At-rbohC | KRIAMDHPNT-----           | KVGVFYCGAPALTKELRHLALDFT     | 891 |
| At-rbohG | KQIAMDHPGA-----           | NVGVFYCGAPVLTKELRQLALEFT     | 835 |
| At-rbohA | KRIAVNHPKT-----           | RVGVFYCGAAGLVKELRHLSLDFS     | 888 |
| At-rbohB | KHVAVNHVQ-----            | RVGVFYCGNTCIIIGELKRLAQDFS    | 829 |
| At-rbohD | KKIAVQHPGK-----           | RIGVYFCGMPGMIKELKNLALDFS     | 907 |
| At-rbohF | TKLSSKHCNA-----           | RIGVYFCGVPVLKELSKLNCNTFN     | 930 |
| At-rbohI | SKISTKHRNA-----           | RIGVYFCGVPVSLGKELSTLCHEFN    | 928 |
| At-rbohE | SSIARKHPNS-----           | TVGVFYCGIQTVAKELKKQAQDMS     | 912 |



|          |                                        |      |
|----------|----------------------------------------|------|
| At-rbohH | SLSSYKYLN-----YISTP-----               | 839  |
| At-rbohJ | SELSNKHETS-----RIGVFYCGSPTLVRPLKSLCQEF | 898  |
| Hs-Nox5  | QKVAAEKKG-----KVQVFFCGSPALAKVLKGHC     | 729  |
| Cf-Nox5  | QKVAAEKK-----GKVQVFFCGSPALAKVLKGHC     | 757  |
| Bt-Nox5  | QKVAAEKK-----GKVQVFFCGSPALAKILKGHC     | 765  |
| Md-Nox5  | QKVAAEKK-----GKVQVFFCGSPALAKVLKSHC     | 738  |
| Xt-Nox5  | QKIEQENK-----GKVQVFFCGSPALAKIKAHC      | 755  |
| Tr-Nox5  | QKVSEKK-----GKVHVFCGSPALAKVIKAQCEHY    | 866  |
| Tn-Nox5  | -----                                  |      |
| Gg-Nox5  | GRVAEERK-----GKVHVFFCGSPALAKVVRMHC     | 928  |
| Ol-Nox5  | QKLSKENKG-----KVHVFCGAPSLAKAIKAQC      | 744  |
| Dr-Nox5  | QKVSEKKG-----KVHVFCGSPALAKVIKAQC       | 625  |
| Sp-Nox5A | TQIAREKKG-----KVQVFFCGSPTLAKIIKKS      | 815  |
| Sp-Nox5B | QNLKQQHKG-----KITVFFCGSPALGKVLSTK      | 904  |
| Ag-Nox5  | KQIQDQKKG-----KVTVFCGPPQLAKTLRYK       | 1028 |
| Am-Nox5  | KHLQDQKKG-----KVTIFFCGPPQLARILRYK      | 930  |
| Dm-Nox5  | KQLQAQKKG-----KVTVFCGPPQLAKTLRYK       | 1079 |
| Dd-NoxC  | QYYSK-----KY-----SGESISVFCGPP          | 1126 |
| Mg-NoxC  | DRHYDDMRKYKAGLVARASRGGGGEDDAASVAD      | 829  |
| Fg-NoxC  | DEHYEMLKFRASKRTSTR---NKEDENYEDEEL      | 729  |
| Cc-NoxD  | GKIAAEAPSNS-----VVGVFFCGPHKMGDSV       | 775  |
| Py-NoxD  | AGITERSRSGS-----VVGVFFCGPHMKSISQD      | 880  |
| Xt-Duox1 | SSLQDVHPKVK-----KIGVFSCGPPGMTKN        | 1490 |
| Xt-Duox2 | ISLQEVHPEVR-----KIGVFSCGPPGMTKN        | 1543 |
| Gg-Duox  | DSLQEVHPEVH-----KIGVFSCGPPGMTKS        | 1429 |
| Tr-Duox  | NSLQDVHPEVG-----KIGVFSCGPPGLTKN        | 1486 |
| Tn-Duox  | NSLQDVHPEVG-----KMGVFSCGPPGLTKN        | 1618 |
| Ol-Duox  | NSLQEVHPEVG-----KMGVFSCGPPGLTKN        | 1538 |
| Dr-Duox  | SSLQEVHPEVE-----KVGVFSCGPPGLTKN        | 1489 |
| Mm-Duox2 | NSLQEVHPQVR-----KIGVFSCGPPGMTKN        | 1503 |
| Rn-Duox2 | DSLQEVHPQVH-----KIGVFSCGPPGMTKN        | 1503 |
| Hs-Duox2 | NSLQEVHPQVR-----KIGVFSCGPPGMTKN        | 1534 |
| Cf-Duox2 | KSLQEVHPQVP-----KIGVFSCGP---RNDQ       | 1282 |
| Hs-Duox1 | NSLQEVHPQVR-----KIGVFSCGPPGMTKN        | 1537 |
| Cf-Duox1 | KSLQEVHPQVR-----KIGVFSCGPPGMTKN        | 1538 |
| Rn-Duox1 | NSLQEVHPQVR-----KIGVFSCGPPGMTKN        | 1533 |
| Mm-Duox1 | NSLQEVHPQVR-----KIGVFSCGPPGMTKN        | 1537 |
| Ci-DuoxA | VSLTEEHAEVE-----KFGVFSCGPPMTSCV        | 1561 |
| Ci-DuoxC | VTLGEHSSVE-----TFGVFSCGPPMTGEV         | 1426 |
| Ci-DuoxD | KTLSWKHSEVK-----KIGVFSCGPPSMTES        | 1500 |
| Sp-Duox  | QSLEDEHPGVG-----KIGVFSCGPPMTGGV        | 1657 |
| Dm-Duox  | KFVQKKHSYVS-----KIGVFSCGPRPLTKS        | 1459 |
| Ag-Duox  | KFVQKKHSYVS-----KIGVFSCGPRPLTKS        | 1460 |
| Am-Duox  | KFVQKKHSYVS-----KIGVFSCGPRPLTKS        | 1466 |
| Ci-DuoxB | DSLQTKHKEVR-----TLGVFSCGPPGLTNG        | 1482 |
| Ce-Duox1 | QFIQSEHKEQS-----KIGVFSCGPVNLNES        | 1482 |
| Ce-Duox2 | QFIQSEHKEQS-----EIGVFSCGPVNLNES        | 1488 |

\*\* \*\* \*

|         |                            |     |
|---------|----------------------------|-----|
| Hs-Nox1 | SLDP-----RKVQFYFNKENF----- | 564 |
| Cf-Nox1 | SLDP-----RKVQFYFNKENF----- | 564 |
| Mm-Nox1 | SLDP-----RKVQFYFNKETF----- | 563 |
| Rn-Nox1 | SLDP-----RKVQFYFNKETF----- | 563 |

|          |            |                   |       |
|----------|------------|-------------------|-------|
| Gg-Nox1  | SLDP-----  | RKVIFYFNKENF----  | 565   |
| Xt-Nox1  | SLDP-----  | RKVQIFYFNKENF---- | 565   |
| Tn-Nox1  | DVDP-----  | RKTKIFYFNKENF---- | 562   |
| Tr-Nox1  | DVDP-----  | RKTKIFYFNKENF---- | 560   |
| O1-Nox1  | DVDP-----  | RKTKIFYFNKENF---- | 565   |
| Dr-Nox1  | DVDP-----  | RRTKIFYFNKENF---- | 576   |
| Mm-Nox2  | ESGP-----  | RGVHFI FNKENF---- | 570   |
| Rn-Nox2  | ESGP-----  | RGVHFI FNKENF---- | 569   |
| Hs-Nox2  | ESGP-----  | RGVHFI FNKENF---- | 570   |
| Cf-Nox2  | ESGP-----  | RGVHFI FNKENF---- | 570   |
| Gg-Nox2  | EADP-----  | RGVHFI FNKENF---- | 570   |
| Xt-Nox2  | TVDP-----  | RGVHFI FNKENF---- | 570   |
| Tn-Nox2  | GAD-----   | VKFI FNKENF----   | 565   |
| Tr-Nox2  | EAD-----   | VKFI FNKENF----   | 565   |
| O1-Nox2  | EAG-----   | VKFI FNKENF----   | 566   |
| Dr-Nox2  | EGG-----   | TEFI FNKENF----   | 565   |
| Hs-Nox3  | SADP-----  | RGVHFYYNKESF----  | 568   |
| Cf-Nox3  | SADP-----  | RGVHFYYNKESF----  | 567   |
| Mm-Nox3  | SVDP-----  | RGVHFYYNKENF----  | 568   |
| Rn-Nox3  | SSDP-----  | RGVHFYYNKENF----  | 568   |
| Gg-Nox3  | TVDP-----  | RGVQFHYNEESF----  | 567   |
| Ci-Nox2  | GGG-----   | VYFHYNKENF----    | 581   |
| Sp-Nox2A | SLTP-----  | DGAKFFYNKENF----  | 582   |
| Sp-Nox2B | SDES-----  | DGTRFVYYKENF----  | 562   |
| Mm-Nox4  | ---S-----  | YGTRFEYNKESFS---- | 578   |
| Rn-Nox4  | ---S-----  | YGTRFEYNKESFS---- | 578   |
| Hs-Nox4  | ---S-----  | YGTRFEYNKESFS---- | 578   |
| Cf-Nox4  | ---S-----  | YGTRFEYNKESFS---- | 584   |
| Gg-Nox4  | ---P-----  | YGTRFEYNKESFS---- | 543   |
| Xt-Nox4  | ---Q-----  | YGTTFEYNKESFT---- | 571   |
| O1-Nox4  | ---S-----  | SGATFEFNKESFS---- | 558   |
| Tr-Nox4  | ---S-----  | SETVFEFNKES----   | 555   |
| Ci-Nox4  | ---S-----  | SKVKFLFNKEAF----  | 811   |
| Ag-Nox   | ---K-----  | HGCKLSYFHEGFG---- | 555   |
| Pa-NoxA  | ---S-----  | SEVFRFRWKEHF----  | 554   |
| Mg-NoxA  | ---V-----  | NEVEFRWKEHF----   | 580   |
| Fg-NoxA  | ---V-----  | PDVDFRWFKEHF----  | 557   |
| An-NoxA  | ---T-----  | NEVKFKFWKEHF----  | 550   |
| Pa-NoxB  | ---E-----  | PGFNFWGKKNF----   | 579   |
| Fg-NoxB  | ---E-----  | PGFSFWGKKNF----   | 570   |
| Mg-NoxB  | ---E-----  | PDFAFVWGKKNF----  | 582   |
| Dd-NoxA  | ---KT----- | TTCRFHYNKKNF----  | 517   |
| Dd-NoxB  | ---GK----- | NNCHLIFHKKNF----  | 698   |
| At-rbohC | HKTS-----  | TRFSFHKKNF----    | 905   |
| At-rbohG | HKTS-----  | TRFSFHKKNF----    | 849   |
| At-rbohA | HKTS-----  | TKFIFHKKNF----    | 902   |
| At-rbohB | RKTT-----  | TKFEFHKKNF----    | 843   |
| At-rbohD | RKTT-----  | TKFDFHKKNF----    | 921   |
| At-rbohF | QKGS-----  | TKFEFHKKEHF----   | 944   |
| At-rbohI | QTGI-----  | TRFDFHKEQF----    | 942   |
| At-rbohE | QKTT-----  | TRFEFHKKEHF----   | 926   |
| At-rbohH | -----      | -----             | ----- |
| At-rbohJ | LESS-----  | TRFTFHKKNF----    | 912   |
| Hs-Nox5  | -----      | FRFFQKNF----      | 737   |
| Cf-Nox5  | -----      | FKFFQKNF----      | 765   |

|          |                                                          |      |
|----------|----------------------------------------------------------|------|
| Bt-Nox5  | -----FKFFQENF-----                                       | 773  |
| Md-Nox5  | -----FKFFKENF-----                                       | 746  |
| Xt-Nox5  | -----FKFFKENF-----                                       | 763  |
| Tr-Nox5  | -----FNFYKENF-----                                       | 874  |
| Tn-Nox5  | -----                                                    |      |
| Gg-Nox5  | -----FRFFKENF-----                                       | 936  |
| O1-Nox5  | -----FNFYKENF-----                                       | 752  |
| Dr-Nox5  | -----FHFYKENF-----                                       | 633  |
| Sp-Nox5A | -----FSFHKENF-----                                       | 823  |
| Sp-Nox5B | -----MEFRKENF-----                                       | 912  |
| Ag-Nox5  | -----FQFRKEVF-----                                       | 1036 |
| Am-Nox5  | -----FNFRKESF-----                                       | 938  |
| Dm-Nox5  | -----FAFRKECF-----                                       | 1087 |
| Dd-NoxC  | -----CLKT-----GGTKFYFHKENF-----                          | 1142 |
| Mg-NoxC  | -----ARGRHDGS-----KIEYHFMIEVFN-----                      | 849  |
| Fg-NoxC  | -----LRGWQDGIHEL-----GRIEWLVNYDGYDDHIN                   | 757  |
| Cc-NoxD  | INSNLRGAYLRSTKEKTLMKDLGLPQRGLIKMLMGTGCSVRFVFREEENFG----- | 825  |
| Py-NoxD  | ALSLARG-YRRGAIGLDGSREMRT-----                            | 903  |
| Xt-Duox1 | -----KRDE-----SYFVHHYENF-----                            | 1504 |
| Xt-Duox2 | -----KENQ-----AHFSSHFFENF-----                           | 1557 |
| Gg-Duox  | KKDQ-----AYFAHQ-----                                     | 1439 |
| Tr-Duox  | KRDQ-----AHFIIHHYENF-----                                | 1500 |
| Tn-Duox  | KRDQ-----THFIIHHYENF-----                                | 1632 |
| O1-Duox  | KRDQ-----AHFIIHHYENF-----                                | 1552 |
| Dr-Duox  | KRDQ-----THFVHHYENF-----                                 | 1503 |
| Mm-Duox2 | RQDR-----AHFVHHYENF-----                                 | 1517 |
| Rn-Duox2 | RQDR-----AHFVHHYENF-----                                 | 1517 |
| Hs-Duox2 | RQDR-----AHFMHHYENF-----                                 | 1548 |
| Cf-Duox2 | AHQQ-----AGPGPLR-----                                    | 1293 |
| Hs-Duox1 | RQDR-----THFSSHYYENF-----                                | 1551 |
| Cf-Duox1 | RQDR-----THFSSHYYENF-----                                | 1552 |
| Rn-Duox1 | KQDR-----THFSSHYYENF-----                                | 1547 |
| Mm-Duox1 | RQDR-----THFSSHYYENF-----                                | 1551 |
| Ci-DuoxA | K-YEGAS-----F-----                                       | 1568 |
| Ci-DuoxC | K-YEGPT-----FSHHFFENF-----                               | 1440 |
| Ci-DuoxD | K-HKGPM-----YAHFFENF-----                                | 1514 |
| Sp-Duox  | K-FDGAA-----FIHHYENF-----                                | 1671 |
| Dm-Duox  | KTRKLPY-----FIHHFFENFG-----                              | 1475 |
| Ag-Duox  | KSRKWPY-----FIHHFFENFG-----                              | 1476 |
| Am-Duox  | KGRRLPY-----FIHHFFENFG-----                              | 1482 |
| Ci-DuoxB | K-LNKAR-----FNHFYENF-----                                | 1496 |
| Ce-Duox1 | RQRDAPS-----FAHRFETF-----                                | 1497 |
| Ce-Duox2 | RQRDAPS-----FAHRFETF-----                                | 1503 |

\* \* \*
