# Supplementary material for: Molecular evolution of the reactive oxygen-generating NADPH oxidase (Nox/Duox) family of enzymes
Source: Springer Nature journal article supplement (doi:10.1186/1471-2148-7-109), 2007-07-06
Supplement: 12862_2007_403_MOESM7_ESM.pdf [file 12862_2007_403_MOESM7_ESM.pdf]

Additional file 7

**Alignment of vertebrate p47phox, NOXO1, p67phox, NOXA1, and p22phox proteins to estimate substitution rates**

To describe species of the genes, we used the following naming: human (*H. sapiens*), dog (*C. familiaris*), rat (*R. norvegicus*), mouse (*M. musculus*), chicken (*G. gallus*), frog (*X. tropicalis*), zebrafish (*D. rerio*), fugu (*T. rubripes*), and tetraodon (*T. nigroviridis*).

Amino acid sequences of p67phox, NOXA1 and p22phox listed in Additional file 6 were aligned. Several sequences of NOXO1 proteins contained partial sequences: the minimum length was 281 amino acids for frog NOXO1 (see Additional file 6). To accurately compare substitution rates, we prepared the trimmed NOXO1 and p47phox sequences corresponding to the region of the minimum length of the NOXO1 (e.g., residues 30-273 in human NOXO1 or residues 32-267 in human p47phox) for alignment.

Alignments of p47phox, NOXO1, p67phox, NOXA1 and p22phox were used to estimate R1 and R2 in Additional file 3.

**p47phox (vertebrates)**

|                   |                                                                |     |
|-------------------|----------------------------------------------------------------|-----|
| human-p47phox     | WQDLSEKVVYRRFTEIYEFHKTLKEMFPIEAGAINPENRIIPHLPAKWFWDGQRAAENHQ   | 122 |
| dog-p47phox       | WHDLSEKVVYRRFTEIYEFHKMLKEMFPIEAGDINPENRIIPHLPAKWFWDGQRAAESRQ   | 122 |
| mouse-p47phox     | WQDLSEKVVYRKFTTEIYEFHKMLKEMFPIEAGEIHTENRVIIPHLPAKWFWDGQRAAESRQ | 122 |
| rat-p47phox       | WQDLSEKVVYRKFTTEIYEFHKMLKEMFPIEAGEIHTENRVIIPHLPAKWFWDGQRAAESRQ | 122 |
| chicken-p47phox   | WNDLSEKLIYRRFTDIYEFHKALKEMFPIESGDINAENRIIPHLPAKWFWDGQRSTQSRQ   | 122 |
| frog-p47phox      | WQDLTEKLVYRKFTTEIYEFHKSLKEMFPIEAGDISKEHRTIIPHLPAKWFWDGLRSTENRQ | 122 |
| tetraodon-p47phox | WSDLTEKLIYRYPEIYTFHKALKEMFPIEAGKIEKRDRIPSLAPPWLDQSKSTETRQ      | 122 |

|                           |                                                                  |     |
|---------------------------|------------------------------------------------------------------|-----|
| fugu-p47 <i>phox</i>      | WSDLTEKLIYRTYPEIYTFHKSLKEMFPPIEAGKIEKRDRIPSPSAPPWLDQSKSTETRQ     | 122 |
| zebrafish-p47 <i>phox</i> | WSDQSEKLVYRRYPEVHTLHKTLKEMFPPIEAGDIDEKDRIPITLPAPKWLNDQKTTETRQ    | 122 |
|                           | * * * * *                                                        |     |
| human-p47 <i>phox</i>     | GTLTEYCGTLMSLPTKISRCPHLLDFFKVRPDDLKLPD-NQTKKPETYLMPKD-GKST-      | 179 |
| dog-p47 <i>phox</i>       | GTLTEYNTLMGLPVKISRCPQLLDFFFRVRPDDLKLPD-SQVKKPETYLVPKD-GKSS-      | 179 |
| mouse-p47 <i>phox</i>     | GTLTEYFNGLMGLPVKISRCPHLLDFFKVRPDDLKLPD-SQAKKPETYLVPKD-GKNN-      | 179 |
| rat-p47 <i>phox</i>       | GTLTEYFNSLMGLPMKISRCPHLLNFFKVRPDDLKLPD-SQVKKPETYLTAKD-GKNN-      | 179 |
| chicken-p47 <i>phox</i>   | GTLAEYCYTLVNLPHKISRCRHVVSFFEVPRDDMNPVTD-SQIRKPEVFLPKD-AKKN-      | 179 |
| frog-p47 <i>phox</i>      | VTLSDYFSSLLSLPPKISRCPHVLFNFQVRSDDVNPVANNNGRKPETFLKLVDTAKKN-      | 181 |
| tetraodon-p47 <i>phox</i> | TLSLDYQCALVNLPPHISRCTHLTSLFKVRPEDENPAAP-NLKRNETFVVSRLARGN-       | 180 |
| fugu-p47 <i>phox</i>      | TLSLDYCHSLVNLPPHISRCTHLTGFFTVRPEDENPPSP-NILKRNETFVVSRLARGN-      | 180 |
| zebrafish-p47 <i>phox</i> | ATLAEYCRSLLNLPANISRCQLIRDFFKMRPEDETPPAP-HPYKRNETFIMSTNRVRSNT     | 181 |
|                           | * * * * *                                                        |     |
| human-p47 <i>phox</i>     | ATDITGPIILQTYRAIANYEKTSGSEMALSTGDVVVEKSESQWFCQMKAKRGWIPAS        | 239 |
| dog-p47 <i>phox</i>       | VTDITGPIILQTYRAIADFEKTSSSQMALATGDDVDDVVEKSESQWFCQTKTKRGWVPAS     | 239 |
| mouse-p47 <i>phox</i>     | VADITGPIILQTYRAIADYEKSSGTEMTVATGDDVDDVVEKSESQWFCQMKTKRGWVPAS     | 239 |
| rat-p47 <i>phox</i>       | VADITGPIILQTYRAIADYEKSSGTEMTVATGDDVDDVVEKSESQWFCQMKTKRGWVPAS     | 239 |
| chicken-p47 <i>phox</i>   | TSDITGPIIVLQTYRAIADYEKSSKSEMAVKAGDAVDVVEKSETGWWFCQLKTKRGWVPA     | 239 |
| frog-p47 <i>phox</i>      | VSDITGPIILQSYRVIADYEKSSKSELAAKNGDVVEIVEKSENGWWFCQLRNKRGWMPAA     | 241 |
| tetraodon-p47 <i>phox</i> | ASEISGPIILDMYRAIADYTKTKTYEINLLAGDQVEIVEKNQNGWWFCQMDSKRGWVPAS     | 240 |
| fugu-p47 <i>phox</i>      | VSEISGPIILDMYRAIADYTKTKTYEINLHAGDQVEIVEKNQNGWWFCQCDKSKRGWVPAS    | 240 |
| zebrafish-p47 <i>phox</i> | TSEITGPIILETYRVIADYSSKSYELTLKMGDMVDIVEKSPNGWWFCQCESRRGWVPAS      | 241 |
|                           | * * * * *                                                        |     |
| human-p47 <i>phox</i>     | FLEPLDSPDETEDPEPNYAG---EPYVAIKAYTAVEGDEVSLLEGEAVEVIHKLLDGWWV     | 296 |
| dog-p47 <i>phox</i>       | YLEPLDSPDEAEDPEPNYEG---EPYVTIKAYTAEMEDEMSELQEGEAIEVIHKLLDGWWV    | 296 |
| mouse-p47 <i>phox</i>     | YLEPLDSPDEAEDPDPNYAG---EPYVTIKAYAAVEEDEMSELSEGEAIEVIHKLLDGWWV    | 296 |
| rat-p47 <i>phox</i>       | YLEPLDSPDEAEDPDPNYAG---EPYVTIKAYAAVEEDEVSLSEGEAIEVIHKLLDGWWV     | 296 |
| chicken-p47 <i>phox</i>   | YLEPMDGPDESEEQEPNYAG---ELYVVQKSYTAVEEDELTLKEGDTIEVIHKLLDGWWV     | 296 |
| frog-p47 <i>phox</i>      | YLEPLDGPDESEEQDPNYEG---DLHITTKDYSGELDDELSELQEGENVEVIHKLLDGWWV    | 298 |
| tetraodon-p47 <i>phox</i> | YLEPLDGPDESEEAADPDYEGS---ELFITIKAYKAEQEDEISLDLGESEIEVIHKLLDGWWV  | 298 |
| fugu-p47 <i>phox</i>      | YLEPLDGPDESEEAADPDYEGS---ELFITIKAYKAEQEDEITLDELGESEIEVIHKLLDGWWV | 300 |
| zebrafish-p47 <i>phox</i> | YLEPLDGADESEEPPEPNYAG---ELYKTRGRYKAVEQDEMTLEAGVIEVIHKLLDGWWV     | 298 |
|                           | * * * * *                                                        |     |
| human-p47 <i>phox</i>     | IR                                                               | 298 |
| dog-p47 <i>phox</i>       | VR                                                               | 298 |
| mouse-p47 <i>phox</i>     | VR                                                               | 298 |
| rat-p47 <i>phox</i>       | VR                                                               | 298 |
| chicken-p47 <i>phox</i>   | IR                                                               | 298 |
| frog-p47 <i>phox</i>      | VR                                                               | 300 |
| tetraodon-p47 <i>phox</i> | VR                                                               | 300 |
| fugu-p47 <i>phox</i>      | VR                                                               | 302 |
| zebrafish-p47 <i>phox</i> | VR                                                               | 300 |
|                           | *                                                                |     |

## NOXO1 (vertebrates)

|                 |                                                             |     |
|-----------------|-------------------------------------------------------------|-----|
| zebrafish-NOXO1 | WSDGNEITVYRSLEDFFKMKHRQLKKKFPF-SNPFKRSARIVPEFK-----GNKWSG-  | 112 |
| tetraodon-NOXO1 | WSDHNEIVVYRTFQDFRKMHK-----LKRS-----GKKKSP-                  | 135 |
| chicken-NOXO1   | WSDQNNILYRTLLEEFKRFHKELKRKFPPIESGLRRSDRTIPRFKD----INGKQKSGK | 93  |
| fugu-NOXO1      | WSDHNEILYRTFEDFKLNRQLKKKFPLEAGLFRKSDNLLPKLKD----VPIFRKNRTT  | 56  |





human-p67 *phox* SVPMMP-YTLKVHYKYTVVMKTPGLPYSQVRDMVSKKLELREHTKLSYRPRDSNELVPL 405  
 dog-p67 *phox* RVPMP-YTVKVHYKYTVVMEIQAGLPYSQLRDMVAKKLELLPEHTKLSYRPPDSHELEPL 407  
 rat-p67 *phox* SVPMMP-YMLKVHYKYTVVMEIQLGLPYSQLRDMVSKKLELLPEHTKLSYRQRDSPELLLL 405  
 chicken-p67 *phox* DIPKP-YVLKVHYKYTVAMQVKPDLSEKLLGLVCDKLELQPEHTMLRYKSAASGELVPL 407  
 frog-p67 *phox* AVAVASYLVKVVYKYTVAIQISSKLPFADLLTLISSKQLLPSRMKLSFK--EDQDDVLL 401  
 tetraodon-p67 *phox* QLVDDSYVVKVRFVTFVAVIPRGSYATLAQKVGEKLSVPADAVILSLSEAAEEDVIN 410  
 fugu-p67 *phox* ELADDSCVVKVRYTFVAVIPRGSYATLAEKISEKLSVPANAIVLSLSEATEQNVID 403  
 zebrafish-p67 *phox* REFSG-CVVKVHFQFTIAIAIAHGQPYGVILQMISSKLLKPASTLTLYAKEGSAERVII 410

:\*\* : :\*.:. : . : : : .\*\* : . \* :

human-p67 *phox* SEDSMKDAWQVKNYCLTLWCENTVGDQGFDPDEPKESEKADANNQTTEPQLKKSQVEAL 465  
 dog-p67 *phox* SEDNMKAAWQVKNYCLTLWCENTVGDQGFDPDEPQSEKSEANNQTTEPTLKEGGHVVAL 467  
 rat-p67 *phox* SEESMKDAWAQVKNYCLTLWCEHTVGDQGFVDEPKEKENSADNRTEPQKPEGTQVVAI 465  
 chicken-p67 *phox* SAQNLEEAWSHSDQCLTVWCDCTEGE-GFLPDSKPEEPQAAAETGP-----TQVVAQ 460  
 frog-p67 *phox* NEENTEKAWSLATDNCLKTKCT-----EVQVRQARSLYCSTMQGYFKAQKYPIAL 452  
 tetraodon-p67 *phox* GSTDMEAVWGRASGRCLTLWCR-----LAEQTSETEPRETFLAL 451  
 fugu-p67 *phox* GGTDMEGVWSRVSGRCLTLWCR-----LAQTNERVQ--KESSLAL 442  
 zebrafish-p67 *phox* EDSEMEAVWNSAKDGRLLTWCS-----VTEGKSASH----AKVVAL 447

. : .\* . : : \*

human-p67 *phox* FSYEATQPEDLEFQEGDIILVLSKVNEDWLEGECKGKIGIFPKVVEDCATTDLESTRRE 525  
 dog-p67 *phox* FTYEATQPEDLEFQQGDI IQIISMVNDWLEGECKGKIGIFPKAFVEEHATDLESSPRG 527  
 rat-p67 *phox* FSYDATQPEDLEFVEGDVILVLSHVNEEDWLEGECKGKIGIFPKAFVEGCAAKNLEGTPRE 525  
 chicken-p67 *phox* YSYEATQPEDLEFQAGDVILVLSKVNEDWLEGCNGKIGIFPSAFVRDGTNDKDP----- 514  
 frog-p67 *phox* FEYEATQPEDLPFCKGDI IKILSHVSEDWWECEQGRMGIFPKVFTEE----- 500  
 tetraodon-p67 *phox* HTYDSPNPEDLTFQQGDKILLSKVNQDWLEGCNGKIGIFPAAFVEEVSVSE----- 504  
 fugu-p67 *phox* HSYDSSNPEDLSFHQDRITLLSKVNQDWLEGEFNGNTGIFPAAFVEEVVANG----- 495  
 zebrafish-p67 *phox* YSYESSTPEDLEFQGNVITVLSKVNEDWLEGCNGKIGIFPSSFVEPLNGDPH----- 501

. \* : . \*\*\*\*\* \* \* : \* : \* \* : \* \* : \* : \* \* : \* . \*\*\*\*\* \* .

human-p67 *phox* V 526  
 dog-p67 *phox* V 528  
 rat-p67 *phox* V 526  
 chicken-p67 *phox* -  
 frog-p67 *phox* -  
 tetraodon-p67 *phox* -  
 fugu-p67 *phox* -  
 zebrafish-p67 *phox* -

## NOXA1 (vertebrates)

human-NOXA1 MASLGDVLRVHLAGAQRDGRDWARALHLFSGVPAPPARLCFNAGCVHLLAGDPEAALRA 60  
 dog-NOXA1 MPSLGDVLDVHWRGVQAVARGDWGCALRLFSGDPDPPAKMCFNLGCVHLLAGDPEAALRA 60  
 mouse-NOXA1 MSSLGDQIRDWHRGVLAVAREDDWSDALCFSDVREPLARMYFNRCVHLMAGDPEAALRA 60  
 rat-NOXA1 MSSLGDQIRDWHRGVLAVAREDDWSDALCFSDVREPLAKMYFNMGCVHLMAGDPEAALRA 60  
 frog-NOXA1 -MHYKEVVRWHEGVVAEKGDYDAALRSFTAIEDPPSRIWVFNVGGIYLLRGDLPRALEA 59  
 zebrafish-NOXA1 -MLYIELIRLWDEAVKAIDIRDWQGALSCLNQTIDHNCRTMFVASTHIALGQVDLAIKA 59

\* \* \* \*\* \* \* \*

human-NOXA1 FDQAVTKDTCMAVGGFFQRGVANFQLARFQEALSDFWLALQLRGHAAIDYTLGLRFLKQ 120  
 dog-NOXA1 FDQAVTKDTCMAVGGFFQRGVANFQLERFQEALSDFRLALQLRGHAAIDYTLGLRFLK 120



human-NOXA1 LAPGEDGHWVPIPEEESLQRAWQDAAACPRGLQLQCRG-AGGRPVLYQVVAQHSYSAQGP 415  
 dog-NOXA1 RDPSHEARWVALPGEALQGAWRDTAASPRGLQLQCRA-AGSRPVLYQAVAQHNYCAQGP 393  
 mouse-NOXA1 KAPGEERSWIPISTEESLQSIWRNVVPGGGLQLQCG- VWGRPVLYQVVAQYNYRAQRP 385  
 rat-NOXA1 KARGEDRAWVPISTEDSLQSVWRNVVSPRGLQLQCRG-AWGRPVLYQVVAQYDYRAQRP 387  
 frog-NOXA1 RDPE-SRGLTPVTGSKDWQEVLLKSRANQVTLCKETTLCAGRPVLYRMRQAQYDYLAAQGP 536  
 zebrafish-NOXA1 RRPG-TRVLTPLNGDDGLDCLGVAESGRAQIWCQNEPLANRTILYQMVALYDYNAQGP 447

\* \*\* \* \* \*\* \*

human-NOXA1 EDLGRFRQDGTVDVLCV--PDVPL-AVDQAWLEGHCDGRIGIFPKCFVVPAGPRMSGAPG 472  
 dog-NOXA1 EDLDRRQGDMDVLCAGQGPVPLHVVDPAWLEGHCDGRIGIFPKCFVVPAG----- 445  
 mouse-NOXA1 EDLDFHQDGTVDVLCV-----DEAWLEGHDRDGCVGIFPKCFVVPAGAYVEAML- 434  
 rat-NOXA1 EDLDFRQDGTVDVLCV-----DEAWLEGHDRDGRVIGIFPKCFVVPAAATCVEALP- 436  
 frog-NOXA1 ADLSFQQGDLISILSEVN-----GEWLEGHCHRIGIFPKCFQAQR-AEGI----- 580  
 zebrafish-NOXA1 EDLEFSEGDTIDILSEVN-----EEWLEGHVAGNIGIFPQSFHRDTSISGAST 497

\*\* \*\* \* \*\*\*\*\* \*\* \*

human-NOXA1 RLPRSQQGDQP 483  
 dog-NOXA1 -----  
 mouse-NOXA1 -VLGPQPGDQN 444  
 rat-NOXA1 -VPEPQPGEQH 446  
 frog-NOXA1 -----  
 zebrafish-NOXA1 D----- 498

## p22phox (vertebrates)

mouse-p22phox MGQIEWAMWANEQALASGLILITGGIVATAGRFTQWYFGAYSIAAGVLICLLEYPRGKRK 60  
 rat-p22phox MGQIEWAMWANEQALASGLILITGGIVATAGRFTQWYFGAYSIVAGVLICLLEYPRGKRK 60  
 Human-p22phox MGQIEWAMWANEQALASGLILITGGIVATAGRFTQWYFGAYSIVAGVFCVCLLEYPRGKRK 60  
 dog-p22phox MGQIEWAMWANEQALASGLILIMGGIVATAGFTKWYFGAYSIGAGVFCVCLLEYPRGKRK 60  
 frog-p22phox MGQIEWAMWANEQALASGLILLAGGIVAVAGQFKGWQFGAYGVAAGVFITLLEYPRSKRK 60  
 tetraodon-p22phox MGKIEWAMWANEQALASGFILLAGGIVGVAGFRGWEFAAYAVAAGVFCVCLLEYPRSKRS 60  
 fugu-p22phox MGKIEWAMWANEQALASGFILLTGGVVGAGQFRGWQFAAYAVAAGVFCVCLLEYPRSKRS 60  
 zebrafish-p22phox MAKIEWAMWANEQALAAGLIYLTGGIVGVAGQFRGWQFAAFGIAAGVFCVCLLEYPRSKRG 60

\* \*\*\*\*\* \* \* \*\* \* \*\* \* \* \* \* \*\* \*\*\*\*\* \*\*

mouse-p22phox KGSTMERCQKYLTSVVKLFGPLTRNYVRAALHFLLSVPAFLLATILGTVCLAIASVI 120  
 rat-p22phox KGSTMERCQKYLTAUVKLFGLPLTRNYVRAVLHLLLSVPAFLLATILGTVCLAIASVI 120  
 Human-p22phox KGSTMERCQKYLTAUVKLFGLPLTRNYVRAVLHLLLSVPAFLLATILGTACLAIASGI 120  
 dog-p22phox KGSTMERCQKYLTAUVKLVFGLPLSRNYVIRAFHLGLSVPAFLLATILGTACLAIASI 120  
 frog-p22phox KGSTMERCQKYLAAVVKLFGPLTRNYVRAILHAGLAVPGGFILSTILGTVCLGII 120  
 tetraodon-p22phox KGTSVERPGQCFIVCVKAFGPVTRNYVRAVLHAAICVPGGFMLATVLCVCLGII 120  
 fugu-p22phox KGTSVERPGQCFIVCVKAFGPVTRNYVRAVLHAAICVPGGFMLATVLCVCLGII 120  
 zebrafish-p22phox KGTSIERSGQYCFIVCVKSFGLPLTRNYVRAFLHAAICVPGGFMLATVLCVCLGII 120

\*\* \*\* \*\* \*\* \*\* \*\* \* \*\* \*\* \* \*\* \* \* \*\* \* \*\* \* \*\* \*

mouse-p22phox YLLAAIRGEQWPIIEPKKERPVGGTIKQPPTNPPRPPAEVRKKPSEEEEEASAG-- 178  
 rat-p22phox YLLAAIRGEQWPIIEPKKERPVGGTIKQPPTNPPRPPAEVRKKPSEEEEEASAG-- 178  
 Human-p22phox YLLAAVIRGEQWPIIEPKPRERQIGGTIKQPPSNPPRPPAEARKKPSEEEAAVAGGPP 180  
 dog-p22phox YLLAAVIRGEQWPIIEPKKERPVGGTIKQPPSNPPRPPAEARKKPSEEEAAVAGVVS 180  
 frog-p22phox YFLAAIRGEWRPIIEKQAEKPRAGETIKRPPENPPRPPAEVRRK----QADEVSVG-- 174  
 tetraodon-p22phox YLVAAIRGEHWEPILPKKEIQKVAESIKNPPQNPPRPPAEVRRKRVDDLEAAAYDN-- 178  
 fugu-p22phox YLVAAIRGEHWEPILPSKEIRKVAESIKNPPQNPPRPPADTRRRKRVDDLEAAAYDN-- 178  
 zebrafish-p22phox YLSAPIHGEHWEPILH-IETKRLGESIKEPQNPPRPPPELRRKADNLDAAAYDN-- 177

\* \* \*\* \* \*\* \*\* \*\* \* \*\* \*\*\*\*\* \* \*

mouse-p22phox -GPQVNPMPVTDEVV 192  
 rat-p22phox -GPQVNPMPVTDEVV 192  
 Human-p22phox GGPQVNPMPVTDEVV 195

|                           |                 |     |
|---------------------------|-----------------|-----|
| dog-p22 <i>phox</i>       | GGPQENPVPVIDEVV | 195 |
| frog-p22 <i>phox</i>      | -GGHVNPIPVTDNV- | 187 |
| tetraodon-p22 <i>phox</i> | -----P-----     | 179 |
| fugu-p22 <i>phox</i>      | -----PISVTANE-  | 186 |
| zebrafish-p22 <i>phox</i> | -----PMSVTINE-  | 185 |

\*
