# Supplementary material for: Molecular evolution of the reactive oxygen-generating NADPH oxidase (Nox/Duox) family of enzymes
Source: Springer Nature journal article supplement (doi:10.1186/1471-2148-7-109), 2007-07-06
Supplement: 12862_2007_403_MOESM8_ESM.pdf [file 12862_2007_403_MOESM8_ESM.pdf]

Additional file 8

**Alignment of EF-hand regions of plant Nox, NoxC, Nox5, and Duox**

Gray-boxes indicate EF-hand motifs. EF-I to EF-IV shown above the alignment correspond to the number of the four EF-hands of Nox5. *Underlines* represent a “helix-loop-helix (HLH)” region of Duox orthologs, and *Bold letters* represent the loop region of the “HLH” region. The letters X, Y, Z, -Y, -X, and -Z indicate the six residues that participate in calcium-binding. The 1<sup>st</sup> transmembrane domains (the 2<sup>nd</sup> for Duox) were indicated as TM1 (or TM2 for Duox) above the alignment. To describe species of the genes, we use the same abbreviations as in Additional file 4.

|                 | -EF-I                              |          |
|-----------------|------------------------------------|----------|
|                 | X                                  |          |
| human-Nox5alpha | QTGPEGCRGTMSAEEDARWLRWVTQQFKTIAGE  | 41       |
| dog-Nox5        | -----MSTEEDAKWLQVWTHQFETIAEK       | 36       |
| cow-Nox5        | -----MNAEEDAKWLQVWTHQFKTIAGE       | 41       |
| chicken-Nox5    | -----MGTAEDAARWLRWVTERFQSIAGH      | 32       |
| frog-Nox5       | -----MSTEDDSKWLEWVTKQFENIAGD       | 24       |
| opossum-Nox5    | -----MNADDDAKRLEWVSFQFE-IAGE       |          |
| fugu-Nox5       | -----                              |          |
| medaka-Nox5     | SSGCSGVSCIMSVEEDARWLEWVTKQFESIAGD  | 44       |
| Sp-Nox5A        | LAFSSVCGNAQPADEDSQWLSWAEEKQFCQIAGE | 42       |
| Sp-Nox5B        | -----MAGMQEKDEKWLVKLEKHFQEVAGD     | 25       |
| fruit fly-Nox5  | ---SHLTNSRPRTGFDKSSSLARLEQLFRTTVGN | 90       |
| mosquito-Nox5   | ---SNLTNSRPRTGFDKSSLERLEQLFIKTVGN  | 89       |
| honeybee-Nox5   | ---SNISDTRPLAGFDKRSLEWLEKIFKQTVGN  | 88       |
| Mg-NoxC         | ---TAAASPNDHVKIEPSTKDKGEDKPKAADA   | 50       |
| Fg-NoxC         | -----                              |          |
| At-rbohF        | LRKQRAQLDRTRSS-AQRALRGLRFISNKQKNV  | DGWN 97  |
| At-rbohI        | LSQRPTRPNRDGSG-TERAIHGLKFISSKENG   | VDWN 186 |
| At-rbohC        | PRP--AKLDRTKSA-ASQALKGLKFI SKTDGG  | AGWS 158 |
| At-rbohG        | PR----LDRSKST-AGQALKGLKI SKTDGN    | AAWT 108 |
| At-rbohA        | PRPQLAKLRRSKSR-AELALKGLKFI TKTDGV  | TGWP 153 |
| At-rbohD        | PSPAVRRFDRTSSA-AIHALKGLKFIATKT     | AAWP 183 |
| At-rbohB        | -----RLDRSKSFGAMFALRGLRFIAKNDAVG   | RGWD 104 |

|                |                                                             |     |
|----------------|-------------------------------------------------------------|-----|
| At-rbohE       | KRKEDAKLQRSTSS-AQRALKGLQFINKTTRGNSC-----VCDWDCDCDQMWK       | 201 |
| At-rbohH       | KKTGPQRVERTTSS-AARGLQSLRFLDRTVTGRE-----RDAWR                | 127 |
| At-rbohJ       | KRPGPQRVERTTSS-AARGLQSLRFLDRTVTGRE-----RDSWR                | 137 |
| Dd-NoxC        | NNNNNNNNNNNNNNYNNNIDNNNNNNNNNNNNINNCNNNNINNDNNNNNNNDNNDNNIN | 273 |
| mouse-Duox1    | -----FRHLFSQVLDINQADAGTLPLDSS-----                          | 792 |
| mouse-Duox2    | -----FRQLFAQVLDINQADAGTLPLDSSQ-----                         | 796 |
| rat-Duox1      | -----FRHLFSQVLDINQADAGTLPLDSS-----                          | 788 |
| dog-Duox1      | -----FRHLFSQVLDIDQADAGTLPLDSSQ-----                         | 792 |
| human-Duox1    | -----FRHLFSQVLDINQADAGTLPLDSSQ-----                         | 792 |
| dog-Duox2      | -----FRYLFAQVLDIDQADAGTLPLNSSQ-----                         | 555 |
| human-Duox2    | -----FRHLFAQVLDINQADAGTLPLDSSQ-----                         | 796 |
| rat-Duox2      | -----FRQLFAQVLDINQADAGTLPLDSSQ-----                         | 796 |
| chicken-Duox   | -----FRHLFARMLDIDKTDAGELNFESSQ-----                         | 764 |
| frog-Duox1     | -----IRHLSHVIDINKEHAGTT--QGG-----                           | 759 |
| frog-Duox2     | -----FRQSFAQVHLITQSDN-MG--SSD-----                          | 759 |
| tetraodon-Duox | -----IRHAFSKVLEIDKCDAGDMSDVSrk843                           |     |
| fugu-Duox      | -----IRHAFSKVLEIDKCDAGDMSGVSRK-----                         | 769 |
| zebrafish-Duox | -----FKHAFSKVLDIDKSDAGDLSRTR-----                           | 769 |
| medaka-Duox    | -----FSKVLEIQKCDAGDMSGVSPRRARE-----                         | 800 |
| Ci-Duox-B      | -----LRQTFAEALNIDDAVEQNSKAKYRH-----                         | 773 |
| Ci-Duox-A      | -----FKAALIAVSSIKVEDGDMSDVINSR-----                         | 749 |
| Ci-Duox-C      | -----FRTALSQVA-MNIESEDL-DRPKRK-----                         | 686 |
| Ci-Duox-D      | -----SMALTSVVLQSMRMEFG--IQISS-----                          | 702 |
| Sp-Duox        | -----FLMAFSQAFKLDLDFPENLESLNKTK-----                        | 919 |
| fruit fly-Duox | -----FREAYALTFGLRPGERRRRSDASSDG-----                        | 770 |
| mosquito-Duox  | -----FREAYALTFGLRPGERRRRSDASLDG-----                        | 771 |
| honeybee-Duox  | -----FREAYALTFGLRPGERRRRSEDSDSG-----                        | 775 |
| Celeg-Duox2    | -----FREAYAKAFND---SELQDSETSFD-----                         | 802 |
| Celeg-Duox1    | -----FREAYAKAFND---SELQDSETSFD-----                         | 794 |

|                 | --EF-I--                                                    | -EF-II- |     |
|-----------------|-------------------------------------------------------------|---------|-----|
|                 | Z-Y-X -Z                                                    | X Y Z-Y |     |
| human-Nox5alpha | -----DGEISLQEFKAALHVKES--FFAERFFALFDSDRSGT-----             |         | 76  |
| dog-Nox5        | -----DREINLQQFKTALNVKEAI-LFAERFFTLFDSDGSGT-----             |         | 72  |
| cow-Nox5        | -----DGEINLQDFKALKVKEASSFFAERFFVLFDSDGSGT-----              |         | 78  |
| chicken-Nox5    | -----DEEIGLEEFKAALQVKES--FFAERFFALFDVDGSGT-----             |         | 67  |
| frog-Nox5       | -----DKEIDLEEFKTKALKVKES--FFAERFFALFDSDGSGS-----            |         | 59  |
| opossum-Nox5    | -----DREIDLQEFKALKVKES--FFAERFFALFDSDGSGT-----              |         | 57  |
| fugu-Nox5       | -----DKEINLQDFKALKVKES--FFAERFFALFDSDGSSS-----              |         | 17  |
| medaka-Nox5     | -----DKEINLCEFKTALKVKES--FFAERFFALFDSDGSGS-----             |         | 79  |
| Sp-Nox5A        | -----DRQIDEDEFKMLNIKKS--FFAERFFHLFDQDGSGY-----              |         | 77  |
| Sp-Nox5B        | -----DNLIDLDEFINALNVKKS--FFAERFFELIDTDQSGS-----             |         | 60  |
| fruit fly-Nox5  | -----EQEIRREEFKKIIVTSKNP--FFTERVFQIFDKDNSGS-----            |         | 125 |
| mosquito-Nox5   | -----EKEIRREEFKKIIVTSKNP--FFTERVFQIFDKDNSGS-----            |         | 124 |
| honeybee-Nox5   | -----EKEIRREEFNKIIVTSKNP--FFTDRVFQIFDKDNSGT-----            |         | 123 |
| Mg-NoxC         | -----RDDGSEAEARADQHPEKPAQANGPETADGDHHPFANS-----             |         | 87  |
| Fg-NoxC         | -----KSVAADHPVRSSQ-----                                     |         | 21  |
| At-rbohF        | DVQSNFEKFEK--NGYIYRSDFACIGMKD---SKEFALELFDALSRRLKVEK---     |         | 247 |
| At-rbohI        | DVQNNFAHLSK--DGYLFKSDFAHCIGLENEN--SKEFALELFDALCRRRRIMVDK--- |         | 238 |
| At-rbohC        | AVEKRFNQITATTGGLLRKTFGECIGMT---SKDFALELFDALARRRNITGEV---    |         | 209 |
| At-rbohG        | VVEKRYLKITANTDGLLRKTFGECIGMN---SKEFALELFDALARSHLKGDV---     |         | 159 |
| At-rbohA        | EVEKRFYVMTTNGLLHRSRFGECIGMK---STEFALALFDALARRENVSGDS---     |         | 204 |
| At-rbohD        | AVDQRFDKLSADSNGLLSAKFWECLGMNKE--SKDFADQLFRALARNNVSGDA---    |         | 236 |
| At-rbohB        | EVAMRFDKLAV--EGKLPKSKFGHCIGMVE---SSEFVNELFEALVRRRGTSSS---   |         | 154 |

|                |                                                               |     |
|----------------|---------------------------------------------------------------|-----|
| At-rbohE       | KVEKRFESLSK--NGLLARDDFGECVGMVD---SKDFAVSVFDALARRRRQKLEK----   | 251 |
| At-rbohH       | SIENRFNQFSV--DGKLPKEKFGVCIGMGD----TMEFAAEVYEALGRRRQIETENG---- | 178 |
| At-rbohJ       | SIENRFNQFAV--DGRLPKDKFGVCIGMGD----TLEFAAKVYEALGRRRQIKTENG---- | 188 |
| Dd-NoxC        | TVDNHDDDIINNSNFNKNEYSPSSNISPISPKSSISSFPTNLNNSINNTGSMVSDSLSSC  | 333 |
| mouse-Duox1    | -----KVREALTCELSRAEFADSLGLKPQD-MFVESMFSLADKDGNGY-----         | 834 |
| mouse-Duox2    | -----QVREALTCELSRAEFADSLGLKPQD-MFVESMFSLADKDGNGY-----         | 838 |
| rat-Duox1      | -----KVREALTCELSRAEFADSLGLKPQD-MFVESMFSLADKDGNGY-----         | 830 |
| dog-Duox1      | -----KVQEALTCELSRAEFAESLGLKPQD-MFVESMFSLADKDGNGY-----         | 834 |
| human-Duox1    | -----KVREALTCELSRAEFAESLGLKPQD-MFVESMFSLADKDGNGY-----         | 834 |
| dog-Duox2      | -----KVREALTCELSRAEFAESLGLKPQD-MFVESMFSLADKDGNGY-----         | 597 |
| human-Duox2    | -----KVREALTCELSRAEFAESLGLKPQD-MFVESMFSLADKDGNGY-----         | 838 |
| rat-Duox2      | -----QVREALTCELSRAEFADSLGLKPQD-MFVESMFSLADKDGNGY-----         | 838 |
| chicken-Duox   | -----KARESLTCELSRAEFAEALGLKVNS-MFVDSMFSLADKDGNGY-----         | 806 |
| frog-Duox1     | -----NFRDVLQCELSREEFADSLGLNPNA-QFVESMFSMADKDHNGY-----         | 801 |
| frog-Duox2     | -----KVKEALKCELSRTEFAESLGLKPQS-MFVESMFSLADEDGNGY-----         | 831 |
| tetraodon-Duox | -----KAKEVLQCELTAGEFADALGLKPDS-LFVDSMFTLADKDGNGY-----         | 885 |
| fugu-Duox      | -----KAKEVLQCELTAAEFADALGLKADS-LFVDSMFTLADKDGNGS-----         | 810 |
| zebrafish-Duox | -----EALQCELTAEFASVGLKSDS-LFVESMFTLADKDGNGY-----              | 808 |
| medaka-Duox    | -----VLQCELTASEFADALCLKPDS-LFVDSMFTLADKDGNGY-----             | 836 |
| Ci-Duox-B      | -----KTMEVADCELTQMELAETMGMPDS-LFVTQMFQLADTDHSGY-----          | 815 |
| Ci-Duox-A      | -----EARKFIHVELSKKEFADYLKLPNS-LFVDQMFSSADSDGSGA-----          | 791 |
| Ci-Duox-C      | -----TLKDLMKVNI TKSEFAEYLKLEDKDS-LFVEQMFLVADSDDEDGT-----      | 728 |
| Ci-Duox-D      | -----FPENLVDIKLSQEEFASLLQMKSSS-LFVQHIFTTADEDQDGF-----         | 744 |
| Sp-Duox        | -----ETKDILECELTKEFADVLTMPKDS-LFVEQMFELVDQDNSGS-----          | 958 |
| fruit fly-Duox | -----EVMTVMRTSLSKAEFAAALGMKPNP-MFVRKMFNIVDKDQDGR-----         | 812 |
| mosquito-Duox  | -----EVMTVMRTSLSKSEFAAALGMKQDD-MFVRKMFNIVDKDKDGR-----         | 813 |
| honeybee-Duox  | -----EVVTVMRTSLSKSEFASALGMRADA-VFVKKMFNIVDKDRDGR-----         | 817 |
| Celeg-Duox2    | -----SNDDILNETISREELASAMGMKANN-EFVKRMFAMTAKHNEDS-----         | 844 |
| Celeg-Duox1    | -----SNDDILNETISREELASAMGMKANN-EFVKRMFAMTAKHNEDS-----         | 836 |

|                 | EF-II-                               | EF-III |
|-----------------|--------------------------------------|--------|
|                 | -X -Z                                | X      |
| human-Nox5alpha | -----ITLQELQEALTLLIHGSPMDKLFQVYDI    | 107    |
| dog-Nox5        | -----ITLQELLEALTLLIHGNPMDKLFQVYDV    | 103    |
| cow-Nox5        | -----ITLQELQKALTLLIHGSPMDKLFQVYDV    | 109    |
| chicken-Nox5    | -----ISLAELHGALALLRGTAAADKLRFQVYDV   | 98     |
| frog-Nox5       | -----ISLDELLKALNLLIHGNETDKLRFLQVYDV  | 90     |
| opossum-Nox5    | -----ITLQELLGALNLLIHGNTMDKLFQVYDV    | 88     |
| fugu-Nox5       | -----ISLDELLKALDLLIHGSETDKLRFLQVYDV  | 48     |
| medaka-Nox5     | -----ISLDELLKALDLLIHGTETDKLRFLQVYDV  | 110    |
| Sp-Nox5A        | -----ISLDELMEGLYLLTKGDPVDKLRFLFSVYDV | 108    |
| Sp-Nox5B        | -----ISLKELIGALRLLVNGTEQEKLHFLQVYDV  | 91     |
| fruit fly-Nox5  | -----ISLQEFIDAIHQFSGQSADDKIRFLFKVYDI | 156    |
| mosquito-Nox5   | -----ISLQEFIDAIHQFAGQSPEDKIKFLFKVYDI | 155    |
| honeybee-Nox5   | -----ISLQEFVDAMHQFAGKSPDDKIKFLFKVYDI | 154    |
| Mg-NoxC         | -----YQVDSARAADPNVYLRDDEIETFLDELHDH  | 118    |
| Fg-NoxC         | -----NVEFLTDKEISDFLDDLHDH            | 40     |
| At-rbohF        | -----INHDELYEYWSQINDESFDRLQIFFDIVDK  | 278    |
| At-rbohI        | -----INLQELYEFWYQITDESFDRLQIFFNMYCY  | 269    |
| At-rbohC        | -----IDGDLKKEFWEQINDQSFDSRLKTFDMVVK  | 240    |
| At-rbohG        | -----ITETELKKFWEQINDKSFDSRLITFFDLMDK | 190    |
| At-rbohA        | -----ININELKEFWKQITDQDFDSRLRTFFAMVVK | 235    |
| At-rbohD        | -----ITKEQLRIFWEQISDESFDAKLQVFFDMVVK | 267    |
| At-rbohB        | -----ITKTELFEFWEQITGNSFDDRLQIFFDMVVK | 185    |

|                |                                                              |     |
|----------------|--------------------------------------------------------------|-----|
| At-rbohE       | -----ITKDELHDFWLQISDQSF DARLQIFFDMA                          | 282 |
| At-rbohH       | -----IDKEQLKLFWEDMIKKDLDCRLQIFFDMDK                          | 209 |
| At-rbohJ       | -----IDKEQLKLFWEDMIKKDLDCRLQIFFDMDK                          | 219 |
| Dd-NoxC        | RNSISSSSIDSSVASIPITIQSIDFEDKNIKSDQFKIISKSNIENTIETNP IPPFNQTN | 393 |
| mouse-Duox1    | -----LSFREFLDILVVFMKGSPEEKSRMLFRMYDF                         | 865 |
| mouse-Duox2    | -----ISFREFLDILVVFMKGSSEDKSRMLFTMYDL                         | 869 |
| rat-Duox1      | -----LSFREFLDILVVFMKGSPEEKSRMLFRMYDF                         | 861 |
| dog-Duox1      | -----LSFREFLDILVVFMKGSPEEKSRMLFRMYDF                         | 865 |
| human-Duox1    | -----LSFREFLDILVVFMKGSPEEKSRMLFRMYDF                         | 865 |
| dog-Duox2      | -----LSFREFLDILVVFMKGSPEDKSRMLFTMYDL                         | 628 |
| human-Duox2    | -----LSFREFLDILVVFMKGSPEDKSRMLFTMYDL                         | 869 |
| rat-Duox2      | -----ISFREFLDILVVFMKGSPEKSRMLFTMYDL                          | 869 |
| chicken-Duox   | -----ISFREFLDILVVFMKGSSEKSKLMFRMYDI                          | 837 |
| frog-Duox1     | -----LSFEFCFICSLIKGSAEDKLFIFSMHDV                            | 832 |
| frog-Duox2     | -----LSFREFLNILVIFMTGTPKEKSELMFKMYDV                         | 862 |
| tetraodon-Duox | -----LSFQEFLDVIVIFMKG-----                                   | 901 |
| fugu-Duox      | -----LSFQEFLDVIVIFMKGSSSEKSSLMFMSNDI                         | 841 |
| zebrafish-Duox | -----LSFQEFLDVIVIFMTGTSEEKSKLLFSTHDI                         | 839 |
| medaka-Duox    | -----LSFQEFLDVMVIFMKGSPEEKSKLMFMSNDV                         | 869 |
| Ci-Duox-B      | -----LSFREFADLIILLMNGSPEQKAKMLFDMDV                          | 846 |
| Ci-Duox-A      | -----ISFREFLDIMVLFTKGSPEEKAKLMFNMYDL                         | 822 |
| Ci-Duox-C      | -----ISFREFLDIIVLFTKGTPEKAQLMFNMYDL                          | 759 |
| Ci-Duox-D      | -----ISFHDFRKIIVLVFKGSPNEKLRLLFDMFDL                         | 775 |
| Sp-Duox        | -----ISFREFLDVIVVFAKQPEDKLLMFNMYDI                           | 989 |
| fruit fly-Duox | -----ISFQEFLDTVLLFSRGKTDDKLRIIFDMCDN                         | 843 |
| mosquito-Duox  | -----ISFQEFLDTVLLFSRGKTDDKLRIIFDMCDN                         | 844 |
| honeybee-Duox  | -----ISFQEFLDTVLLFSRGKTEDKLRIIFDMCDK                         | 848 |
| Celeg-Duox2    | -----LSFNEFLTIVLREFVNAPQKQKLQTLFKMCDL                        | 875 |
| Celeg-Duox1    | -----LSFNEFLTIVLREFVNAPQKQKLQTLFKMCDL                        | 867 |

|                 |                               |     |
|-----------------|-------------------------------|-----|
| -               | -                             |     |
| Y               |                               |     |
| human-Nox5alpha | D-----                        | 108 |
| dog-Nox5        | DGWARQGGVCRYRVGPSTRP-----     | 123 |
| cow-Nox5        | DVCARQGAFASTEGAGAG-----       | 127 |
| chicken-Nox5    | D-----                        | 99  |
| frog-Nox5       | DIWCLCPPTGSRTDSEWNSRHTVH----- | 114 |
| opossum-Nox5    | DGLCYRSYSPS-TGSQWSLGKCSS----- | 111 |
| fugu-Nox5       | D-----                        | 49  |
| medaka-Nox5     | D-----                        | 111 |
| Sp-Nox5A        | D-----                        |     |
| Sp-Nox5B        | D-----                        |     |
| fruit fly-Nox5  | D-----                        | 157 |
| mosquito-Nox5   | D-----                        | 156 |
| honeybee-Nox5   | D-----                        | 155 |
| Mg-NoxC         | N-----                        | 119 |
| Fg-NoxC         | D-----                        | 41  |
| At-rbohF        | N-----                        | 279 |
| At-rbohI        | Q-----                        | 270 |
| At-rbohC        | D-----                        | 241 |
| At-rbohG        | D-----                        | 191 |
| At-rbohA        | D-----                        | 236 |
| At-rbohD        | D-----                        | 268 |
| At-rbohB        | N-----                        | 186 |

|                |                                                            |       |     |
|----------------|------------------------------------------------------------|-------|-----|
| At-rbohE       | N                                                          | ----- | 283 |
| At-rbohH       | N                                                          | ----- | 210 |
| At-rbohJ       | D                                                          | ----- | 220 |
| Dd-NoxC        | QCEVQLQSHSLPTILKQPHIYKSKSFSSINSNSKIKKIKKSRSEIESKINLFDVINHI |       | 453 |
| mouse-Duox1    | D                                                          | ----- | 866 |
| mouse-Duox2    | D                                                          | ----- | 870 |
| rat-Duox1      | D                                                          | ----- | 862 |
| dog-Duox1      | D                                                          | ----- | 866 |
| human-Duox1    | D                                                          | ----- | 866 |
| dog-Duox2      | D                                                          | ----- | 629 |
| human-Duox2    | D                                                          | ----- | 870 |
| rat-Duox2      | D                                                          | ----- | 870 |
| chicken-Duox   | D                                                          | ----- | 838 |
| frog-Duox1     | N                                                          | ----- | 833 |
| frog-Duox2     | D                                                          | ----- | 863 |
| tetraodon-Duox |                                                            | ----- |     |
| fugu-Duox      | G                                                          | ----- | 842 |
| zebrafish-Duox | K                                                          | ----- | 840 |
| medaka-Duox    | G                                                          | ----- | 870 |
| Ci-Duox-B      | D                                                          | ----- | 847 |
| Ci-Duox-A      | D                                                          | ----- | 823 |
| Ci-Duox-C      | D                                                          | ----- | 760 |
| Ci-Duox-D      | N                                                          | ----- | 776 |
| Sp-Duox        | D                                                          | ----- | 990 |
| fruit fly-Duox | D                                                          | ----- | 844 |
| mosquito-Duox  | D                                                          | ----- | 845 |
| honeybee-Duox  | D                                                          | ----- | 849 |
| Celeg-Duox2    | E                                                          | ----- | 876 |
| Celeg-Duox1    | E                                                          | ----- | 868 |

**--EF-III--**

Z-Y-X -Z

|                 |       |                                               |     |
|-----------------|-------|-----------------------------------------------|-----|
| human-Nox5alpha | ----- | GSGSIDPDELRTVLQSCLRESAISLPDEKLDQLTLA          | 144 |
| dog-Nox5        | ----- | HSAASPLGTGSGSIDADELRTVLRSCMRESAISLPDEKLDQLTLA | 168 |
| cow-Nox5        | ----- | PQASSSPETGSGSIDADELRTVLQSCLYESAISLPKEKLDQLTLA | 172 |
| chicken-Nox5    | ----- | GSGSIDAAELLLVLRACLRESAISLPPQRLHDMARV          | 135 |
| frog-Nox5       | ----- | WQCLEPFSFPGSGSIDPSELRTVLKSCRESAISLPEEKLDDLTLV | 160 |
| opossum-Nox5    | ----- | PLGHGNGSIDPDELRVVLQSCLKESAISLPEEKLDDLTLA      | 151 |
| fugu-Nox5       | ----- | GSGSIDPDELRIVLKSCRESAISLPEEKLDDLTLV           | 85  |
| medaka-Nox5     | ----- | ACFMMKVTGSGSIDPDELRTVLKSCLESASISLPEEKLDDLTLV  | 153 |
| Sp-Nox5A        | ----- | GNGAIDHEELKVVLRACLCESSMTISEATIDAL TSA         | 95  |
| Sp-Nox5B        | ----- | GSGFIDFDELKTVLRSC TAESAMTLCDETLTELTEI         | 78  |
| fruit fly-Nox5  | ----- | GDGLIQHKELHDVIRHC IKENGMEFSEDQIEDL TSA        | 193 |
| mosquito-Nox5   | ----- | GDGLIQHRELQHV MRACMEENGMRFS EDQIEDL TMA       | 192 |
| honeybee-Nox5   | ----- | GDGLIQLRELEHVMRACLEENGIRFSEEQIEEL TMA         | 191 |
| Mg-NoxC         | ----- | GDGCIDYSEVERKLDDEVHDELAPTAQPHHLHHD--S         | 153 |
| Fg-NoxC         | ----- | NDGHINYEEVERKLDQEHANLVPKPSAHHVISTDHS          | 77  |
| At-rbohF        | ----- | EDGRITEEEVKEIIMLSASANKLSRLKEQAE EYAAL         | 315 |
| At-rbohI        | ----- | LSSNLVKHIDQHIIILSASANNLSRLRERAE EYAAL         | 306 |
| At-rbohC        | ----- | ADGRLTEDEVREIISLSASANNLSTIQKRADEYAAL          | 277 |
| At-rbohG        | ----- | SDGRLTEDEVREI IKLSSSANHLSCIQNKADEYAAM         | 227 |
| At-rbohA        | ----- | SDGRLNEAEVREIITLSASANELDNIRRQADEYAAL          | 272 |
| At-rbohD        | ----- | EDGRVTEEEV AEIISLSASANKLSNIQKQAE EYAAL        | 304 |
| At-rbohB        | ----- | LDGRITGDEVKEI IALSASANKLSKIKEN VDEYAAL        | 222 |

|                |                              |                                       |      |
|----------------|------------------------------|---------------------------------------|------|
| At-rbohE       | -----                        | EDGKITREEIKELLMLSASANKLAKLKEQAEYASL   | 319  |
| At-rbohH       | -----                        | GDGKLTREEVKEVIVLSASANRLGNLKKNAAYASL   | 246  |
| At-rbohJ       | -----                        | GDGKLTREEVKEVIVLSASANRLVNLKKNAAASYASL | 256  |
| Dd-NoxC        | YLNSKVGSEEQKITSVFKLYDIYDKGFI | SRDDLKEVLNRYRTKQGLKFQDFTMESLIDH       | 513  |
| mouse-Duox1    | -----                        | GNGLISKDEFIRMLRSFIEISNNCLSKAQLAEVVES  | 902  |
| mouse-Duox2    | -----                        | GNGFLSKDEFFTMRSFIEISNNCLSKAQLAEVVES   | 906  |
| rat-Duox1      | -----                        | GNGLISKDEFIRMLRSFIEISNNCLSKDQLAEVVES  | 898  |
| dog-Duox1      | -----                        | GNGLISKDEFIRMLRSFIEISNNCLSKAQLTEVVES  | 902  |
| human-Duox1    | -----                        | GNGLISKDEFIRMLRSFIEISNNCLSKAQLAEVVES  | 902  |
| dog-Duox2      | -----                        | ANGFLSKDEFFTMRSFIEISNNCLSKAQLTEVVES   | 665  |
| human-Duox2    | -----                        | ENGFLSKDEFFTMRSFIEISNNCLSKAQLAEVVES   | 906  |
| rat-Duox2      | -----                        | GNGFLSKDEFFTMRSFIEISNNCLSKDQLAEVVES   | 906  |
| chicken-Duox   | -----                        | ENGFLSKEEFLRMLRYFSSAQQTFSQRLQLQVSAQA  | 874  |
| frog-Duox1     | -----                        | GNGILPKEEFSRMLRSFRNVS-SFLSNEKTENVIES  | 868  |
| frog-Duox2     | -----                        | GNGFLSKDEFFTMLKSFIEISNNCLSKDQTEQVIEI  | 899  |
| tetraodon-Duox | -----                        | -----RSFLEISNCTLSKAQAEDGIRA           | 923  |
| fugu-Duox      | -----                        | GTGSLSKGEF-----                       | 852  |
| zebrafish-Duox | -----                        | GDGFLSKEEFTSLLRSFIDIS-GALSQSQADDGIAA  | 875  |
| medaka-Duox    | -----                        | GNGYLSKEEFARMLRSFIEISNGALSKTQAEDGIIKA | 906  |
| Ci-Duox-B      | -----                        | HSGEINREEGRNMIKSFLEMAGANLGPDEVSAAVST  | 883  |
| Ci-Duox-A      | -----                        | KSGELSKKEFKVMLKSMMDMVNASVDSEQVEELVNT  | 859  |
| Ci-Duox-C      | -----                        | KSGGLSKDEFFTMLKSMEMVNSSADVNDISVVD     | 796  |
| Ci-Duox-D      | -----                        | QNGSLTKQFKEMCMCTADTYQSTVDQNVLENVLSK   | 812  |
| Sp-Duox        | -----                        | RSGHLSREEFRQMLKSMEMVSASVETDLDKLIHD    | 1026 |
| fruit fly-Duox | -----                        | RNGVIDKGELSEMMRSLVEIARTTSLGDDQVTELD   | 880  |
| mosquito-Duox  | -----                        | RNGVIDKGELSEMMRSLVEIARTTSLTDEQVNELID  | 881  |
| honeybee-Duox  | -----                        | CNGVIDKEELSEMLRSLVEIARTTSLSDDHVTELD   | 885  |
| Celeg-Duox2    | -----                        | GKNKVLRKDLAELVKSLNQTAGVHITESVQLRLFND  | 912  |
| Celeg-Duox1    | -----                        | GKNKVLRKDLAELVKSLNQTAGVHITESVQLRLFNE  | 904  |

-----EF-IV-----

X Y Z -Y-X -Z

|                 |               |                           |       |     |
|-----------------|---------------|---------------------------|-------|-----|
| human-Nox5alpha | LFESADADGNG   | AITFEELRDELQRFPGVMENLTI   | ----- | 178 |
| dog-Nox5        | LFESADKDCNG   | AITFDELRLDELQRFPGVMENLTI  | ----- | 203 |
| cow-Nox5        | LFESADKDCSG   | TITFEELRDELQRFPGVLENLTI   | ----- | 206 |
| chicken-Nox5    | LLEAADQDGNG   | SITFQELQQLEAVPGLMESLTI    | ----- | 169 |
| frog-Nox5       | LFESADKDHSNG  | SITFQELKEELERFPEVMENLTI   | ----- | 194 |
| opossum-Nox5    | LFESADKDHSNG  | SITFEELQEELDKFPEVMENLTI   | ----- | 185 |
| fugu-Nox5       | LFESADKDKSG   | AITFEELKAELESFPEVMENLTI   | ----- | 119 |
| medaka-Nox5     | LFESADTDNSG   | SITFEELKEELENFPEVMENLTI   | ----- | 188 |
| Sp-Nox5A        | LFEAADTDGSG   | AISFEELKEELENPDMENLTI     | ----- | 129 |
| Sp-Nox5B        | LFDDADVVDGNG  | EVSFEELSEQLQRYPGITSNLTI   | ----- | 112 |
| fruit fly-Nox5  | MFEDADPHNSG   | EITYEALKNQLHKHGLENLSI     | ----- | 227 |
| mosquito-Nox5   | MFEDADKYNRG   | AITYEALKNQLEKHGLENLSI     | ----- | 226 |
| honeybee-Nox5   | LFDDADQSNRG   | AITFEALKQLEKHEGLENLSI     | ----- | 225 |
| Mg-NoxC         | KQDRERHVFLR   | SVIG-SDQDRIPRADFARVVKSWR  | ----- | 187 |
| Fg-NoxC         | DDRTRHAFRLR   | RMMGDSGVDQIPRDEFAMVKEWK   | ----- | 112 |
| At-rbohF        | IMEELDPERLG   | YIELWQLETLLQKDTYLNYSQAL   | ----- | 350 |
| At-rbohI        | IMEELAPDGLYSQ | YIELKDLLEILLKEDISHSYSLPF  | ----- | 343 |
| At-rbohC        | IMEELDPDNIG   | YIMLESLETLLQAATQSVITSTG   | ----- | 312 |
| At-rbohG        | IMEELDPDHMG   | YIMMESLKKLLQAETKSVSTDINSE | ----- | 264 |
| At-rbohA        | IMEELDPYHYG   | YIMIENLEILLQAPMQDVRDGE    | ----- | 307 |
| At-rbohD        | IMEELDPDNAG   | FIMIENLEMLLQAPNQSVRMGDS   | ----- | 339 |
| At-rbohB        | IMEELDRDNLG   | YIELHNLETLLQVPSQSNNSPSS-A | ----- | 259 |

|                |                                                                     |      |
|----------------|---------------------------------------------------------------------|------|
| At-rbohE       | IMEELDPENFG--YIELWQLETLLLRDAYMN-----                                | 349  |
| At-rbohH       | IMEELDPDHKG--YIEMWQLEILLTGMVTNADTEKMK-----                          | 281  |
| At-rbohJ       | IMEELDPNEQG--YIEMWQLEVLLTGIVSNADSHKVVR-----                         | 292  |
| Dd-NoxC        | IFQQFDKNMDG--YIDFEEFKSELTINNENKVKEKEE-----                          | 548  |
| mouse-Duox1    | <u>MFRESGF-QDKEELTWEDFHFML-RDHSDLRFTQLCVKGVEVPEVIKNLCRRASYISQE</u>  | 960  |
| mouse-Duox1    | <u>MFRESGF-QDKEELTWEDFHFML-RDHSDLRFTQLCVKG</u> -----                | 944  |
| rat-Duox1      | <u>MFRESGF-QDKEELTWEDFHFML-RDHSDLRFTQLCVKGVEVPEVIKNLCRRASYISQE</u>  | 956  |
| dog-Duox1      | <u>MFRESGF-QDKEELTWEDFHFML-RDHSDLRFTQLCVKGVEVPEVIKDLRASYISQE</u>    | 960  |
| human-Duox1    | <u>MFRESGF-QDKEELTWEDFHFML-RDHNSLRFTQLCVKGVEVPEVIKDLRASYISQD</u>    | 960  |
| dog-Duox2      | <u>MFRESGF-QDKEELTWEDFHFML-RDHSDLRFTQLCVRGVG</u> -----DIFKPN        | 711  |
| human-Duox2    | <u>MFRESGF-QDKEELTWEDFHFML-RDHSDLRFTQLCVKGGGGGGNGI</u> ----RDIFKQN  | 959  |
| rat-Duox2      | <u>MFRESGF-QDKEELTWEDFHFML-RDHSDLRFTQLCVKGGAGGTG</u> -----DIFKQS    | 956  |
| chicken-Duox   | AHCFSSS-VPK-EATWPKMGSTL-TTR-----                                    | 898  |
| frog-Duox1     | <u>MFNEAGI-SNKELAWEDFYGLF-KDHKNILNQTNYFDGIHVIN</u> -----QSY         | 914  |
| frog-Duox1     | <u>MFRDSGF-QNKEELTLEDFHYLL-RDHDKELRFSQICIAGMDAPEVFNQMCRRVSFVDTT</u> | 957  |
| tetraodon-Duox | <u>MMQATGF-DRKEKITWKDFHFLL-QDHEKELQFAQLNVKGMKRGQRRLSRDQVRSFICP</u>  | 981  |
| fugu-Duox      | -----ARMLRFDPHFLFIL-APVPI TRPILPFCRSFIEISN-----CTLS                 | 891  |
| zebrafish-Duox | <u>MLQTAGL-YNKDRFSWEDFHFLL-RDHSAQLNIKGMVVLGK</u> -----KCLG          | 918  |
| medaka-Duox    | <u>MMQAAGF-NNKEQISWEDFHFLL-ADHDKELQFAKLVKGGQTCIVKEVPLWMEKEGRKR</u>  | 964  |
| Ci-Duox-B      | <u>IFKEAGIGENKDSLTLEDFTYVLLKDHREAFESSELSMPGRSNLYKDQGESEQNKMSDQ</u>  | 943  |
| Ci-Duox-A      | <u>MLATHGY-EHKESLTLEDFQTVM-QKYSTELSDASLTVPAVKSFYFCLRYFFIYFCTNE</u>  | 917  |
| Ci-Duox-C      | <u>MMRANGF-SSKDSLDFLMLL-GQYS-DISNQQSTSNHGK</u> -----TYQAKRQ         | 842  |
| Ci-Duox-D      | <u>VVPLKND-EEIQYLKFDFFKML-DLPEMDEAMLNLTAPVIG</u> -----KNKKS         | 857  |
| Sp-Duox        | <u>MFQNAAGL-GDKEALSDDFIAVM-AEHKDELNNAKLDIAGNIPQIAGQKDGPPGGAAT</u>   | 1084 |
| fruit fly-Duox | <u>GMFQDVGLEHKNHLYQDFKLM-KEYKGDVFAIGLDCKGA</u> -----                | 920  |
| mosquito-Duox  | <u>GMFQDVGLEHKNHLYEDFKLM-KEYKGDVFAIGLDCKGA</u> -----                | 921  |
| honeybee-Duox  | <u>GMFQDAGLERKDYLTYNDFKLM-KEYKGDVFAIGLDCKGA</u> -----               | 925  |
| Celeg-Duox2    | <u>VLHKSQVSDDAEYLTCNFDALF-SEISDVQPIGLPFN</u> -----                  | 949  |
| Celeg-Duox1    | <u>VLHYAGVSNDAKYLYDDFNALF-SDIPDKQPVGLPFN</u> -----                  | 941  |

|                 |       |                 |     |
|-----------------|-------|-----------------|-----|
| human-Nox5alpha | ----- | SAHWLTAPAPR     | 190 |
| dog-Nox5        | ----- | CGSASRVGTARVQV  | 217 |
| cow-Nox5        | ----- | SAHWLTPAPQ      | 218 |
| chicken-Nox5    | ----- | SAASWLKPPAPT    | 181 |
| frog-Nox5       | ----- | SAANWLKPPAVQ    | 206 |
| opossum-Nox5    | ----- | SAANWLKPPSSK    | 197 |
| fugu-Nox5       | ----- | SAANWLKPPDLE    | 131 |
| medaka-Nox5     | ----- | SAANWLKPPDLD    | 201 |
| Sp-Nox5A        | ----- | SAASWLKPPSLK    | 141 |
| Sp-Nox5B        | ----- | -----           | 112 |
| fruit fly-Nox5  | ----- | TIDRWLVPIAED    | 239 |
| mosquito-Nox5   | ----- | SIDRWLVPLPQE    | 238 |
| honeybee-Nox5   | ----- | SIDRWLVPPKPE    | 237 |
| Mg-NoxC         | ----- | VPSMKQEGDKDDQ   | 201 |
| Fg-NoxC         | ----- | IPSLKQAKKEEED   | 126 |
| At-rbohF        | ----- | SYTSQALSQNLQG   | 363 |
| At-rbohI        | ----- | SQTSRALSQNLK-   | 355 |
| At-rbohC        | ----- | ERKNLSHMMSQRLKP | 327 |
| At-rbohG        | ----- | ERKELSDMLTESLKP | 279 |
| At-rbohA        | ----- | KKLSKMLSQNLMV   | 320 |
| At-rbohD        | ----- | RILSQMLSQKLRP   | 352 |

|                |                                                               |      |
|----------------|---------------------------------------------------------------|------|
| At-rbohB       | -----NKRALNKMLSQKLIP                                          | 273  |
| At-rbohE       | -----YSRPLSTTSGG                                              | 360  |
| At-rbohH       | -----KSQTLTRAMIP                                              | 292  |
| At-rbohJ       | -----KSQQLTRAMIP                                              | 303  |
| Dd-NoxC        | -----NTNYNFKEENIG                                             | 560  |
| mouse-Duox1    | KICPSPRMSAHCARNN---MKTASSPQRLQCPMDTDPPEIIRRRFGKKVTSFQPL--LF   | 1014 |
| mouse-Duox2    | -----GAGGTKDIFK--FKQSSACR-----VSFINRTPGNRMGSPR--LY            | 980  |
| rat-Duox1      | KICPSPRMSAHCARNN---TKTASSPQRLQCPVDTDPPEIIRRRFGKKVTSFQPL--LF   | 1010 |
| dog-Duox1      | KICPSPRVSARCPHSN---TEVEWTPQRLQCPVDTDPPEIIRRRFGKKVTSFQPL--LF   | 1014 |
| human-Duox1    | MICPSPRVSARCSRS---IETELTPQRLQCPMDTDPPEIIRRRFGKKVTSFQPL--LF    | 1014 |
| dog-Duox2      | ISCRVSFITRTPGKRS---CSQDLEFSASEAPELGGP--GLKKRFGKKVVGTPR--LY    | 763  |
| human-Duox2    | ISCRVSFITRTPGERS---HPQGLGPPAPEAPELGGP--GLKKRFGKKAAPTTPR--LY   | 1011 |
| rat-Duox2      | NACRVSFLTRTPGNR-----VMAPSPR--LY                               | 980  |
| chicken-Duox   | ----SPFLLAN-----QYQLH--LY                                     | 912  |
| frog-Duox1     | VLCIICSDSNINYNI---SSALCFILFICFIALLLIKHLCHPNRNTSQIQLPN--IY     | 968  |
| frog-Duox2     | NMCQSPNPSSLTGRIRKKVRNTTFLMHINFFRTNPHLFDLEKQTRKLIKPKTSS--EA    | 1015 |
| tetraodon-Duox | ASRWGHWFSI-----IFNCNDHFNTSCSMAASARRKYTRFADRKSQFLPN--VF        | 1029 |
| fugu-Duox      | KKQAEDAIG-----AMMTAAGFDHKEKITWEDFHLLRDHEKELHVRPN--VY          | 938  |
| zebrafish-Duox | RQHKVSFIRK-----NSSSSVEELTHTPEEEHGQELRQRQTKKAGQSQAQ--LY        | 966  |
| medaka-Duox    | LSQCQRVSFICPKKSVICFWLCLTVCSNKD-----KAEGLELRRRKNKTSIKTPN--VY   | 1015 |
| Ci-Duox-B      | RRVDKPYI IKDNNQ-----LLSTYSTYNLSDDVICIPNNNIRQNI TVQNFFFRSNGKVF | 997  |
| Ci-Duox-A      | SFLHVRLLRITQNFL-----VFIKLSLLIKNYEPKIYRKNPEKKNRTPETS-RIQ       | 967  |
| Ci-Duox-C      | SKYHRYSKRKFEK-----YVRLHCIKSMFTKLYITHRPQTPQRRLTR---K           | 885  |
| Ci-Duox-D      | LAKSSKNERPNRGNFI-----QTAEGQGIVRNNHPQIIAPPCEKSPNVST--VEN       | 906  |
| Sp-Duox        | VIRRGNLNSRARQTII-----RAYKDRDQASTKANGAAKAGGSGGGVVRKRAQSKSVR    | 1137 |
| fruit fly-Duox | -----KQNFLDTSTNVARMTSFN                                       | 938  |
| mosquito-Duox  | -----KQNFLDTSTNVARMTSFH                                       | 939  |
| honeybee-Duox  | -----KQNFLDTSTNVARMTSFH                                       | 943  |
| Celeg-Duox2    | -----RKNYNSHIKEPSCHTSFP                                       | 967  |
| Celeg-Duox1    | -----RKNYQPSIGETSSLNSFA                                       | 959  |

---TM1-(TM2 for Duox)--

|                 |                                                             |     |
|-----------------|-------------------------------------------------------------|-----|
| human-Nox5alpha | PR-----PRRPRQLTRAYWHNHRSLFCLATYAGLHVLLFGLAASAHRDL-----      | 235 |
| dog-Nox5        | PL-----QLRRLALTWAYWHNHRSHLLCLAAAFAGLHLLLFALAASEHRAR-----    | 262 |
| cow-Nox5        | RH-----RRQPRLLTSAYWHNHRSHVLCIAVAVGLHMLLFALAASAYRAF-----     | 263 |
| chicken-Nox5    | RH-----SRRPRCPTSRSWHNHRGQLAFLGGYVSLNLLFTLAALRHFGG-----      | 226 |
| frog-Nox5       | NK-----SHTPRYLTRTYWHNHRSKLLFMCCYWCLNVLLFGLAAVNHASL-----     | 251 |
| opossum-Nox5    | KR-----PQIPRHLTSAYWHNNC183-AVLAVYIGLNILLFTLAALKYQS-----     | 241 |
| fugu-Nox5       | QKKQ-----NHTPRYLTRAYWHNCRKLLFLCMYAFFSLMLFVNAMLQHSYG-----    | 178 |
| medaka-Nox5     | QNKH-----QTPRYLTRAYWQNSRKLFLFGYGVNLLLFVVAAMLRHSDG-----      | 247 |
| Sp-Nox5A        | PSR-----RVLPRYLTRWYVHNRYRILFVVFILINVALFTEAARYAKK-----       | 237 |
| Sp-Nox5B        | -----SYNTRLRNHFSVIFWIVFVMINAGLAAWAGAYEGYQS-----             | 198 |
| fruit fly-Nox5  | RQAGGAAKSGFWNSLPHQFSLAYMKNQVFTYLYFFYITVNLCLFISRAIQYRAS----- | 294 |
| mosquito-Nox5   | DTKKRKKK---PLPHQLTAPYIKNNYVYLSFLTIVFTLINVGLFVSRAIQYRNS----- | 289 |
| honeybee-Nox5   | SKRKSRLQLLAS-LRPYQLTKPYMKNYVYIFFISIFILINVSFLVSRLEYRKS-----  | 291 |
| Mg-NoxC         | DKYLR-----DMSTFRVRVAYVAVHGPETIAFLGIVVGLQLGLGIWQCHKYASGEQ--  | 251 |
| Fg-NoxC         | KSYIK-----RLPGWRRIRSYVAVHGPETIVFLGVVISMQLAFGIWQLVKYQTPG--   | 176 |
| At-rbohF        | LRGKSR-----IHRMSSDFVYIMQENWKRIWVLSLWIMIMIGLFLWKFFQYKQKD--   | 413 |
| At-rbohI        | ---DR-----RWRMSRNLLYSLQDNWKRIWVLTWVFWIMAWLFMWKCYQYKHKD--    | 401 |
| At-rbohC        | TFNRNP-----LKRWYRGLRFFLLDNWQRCWVIVLWFIVMAILFTYKYIQYRRSP--   | 377 |
| At-rbohG        | TRDPNH-----LRRWYQRLRFFVLDWSQRVWVIALWLTIMAILFAYKYIQYKNRA--   | 329 |
| At-rbohA        | PQSRNL-----GARFCRGMKYFLFDNWKRVVVMALWIGAMAGLFTWKFMEYRKRK--   | 370 |



|                |                                                                |      |
|----------------|----------------------------------------------------------------|------|
| At-rbohD       | AKESNP-----LVRWSEKIKYFILDNQRLWIMMLWLGICGGLFTYKFIQYKNKA----     | 402  |
| At-rbohB       | TKDRNP-----VKRFAMNISYFFLENWKRIVVLTWLTWISICITLFTWKFLQYKRKT----  | 323  |
| At-rbohE       | -----VNNWQRSWVLLVWVMLMALFVWKFLEYREKA----                       | 392  |
| At-rbohH       | ERYRTP-----MSKYVSVTAELMHENWKKLWVLAALWAIINVYLFMWKYEEFMRNP----   | 342  |
| At-rbohJ       | KRYRTP-----TSKYVVVTAELMYEHWKKIWWVTLWLAVNVVLFMWKYEEFTTSP----    | 353  |
| Dd-NoxC        | IYTEKE-----SFHSLKRYLKIEGSKLFFISLFFIINSLVITSFLNVHANNKR--        | 1542 |
| mouse-Duox1    | TEAHREKFQRRRHQTVQQFKRFIENYRRHIGCVAVFYTITGALFLERAYYYAFAAHHSG    | 1074 |
| mouse-Duox2    | TEALQEKKQSGFLAQKFKQYKRFVFNRRHIVCVTIFSAICIGLFADRAYYYGFASPPD     | 1040 |
| rat-Duox1      | TEAHREKFQRRRHQTVQQFKRFIENYRRHIGCVAVFYTITGALFLERAYYYAFAAHHSG    | 1070 |
| dog-Duox1      | TEAQRKFKQRRRHQTVQQFKRFIENYRRHIGCVAVFYAITGGLFLERAYYYAFGAHHMG    | 1074 |
| human-Duox1    | TEAHREKFQRRSCLHQTVQQFKRFIENYRRHIGCVAVFYAIAAGGLFLERAYYYAFAAHHGT | 1074 |
| dog-Duox2      | TEALKEKMQRGLLAQKLRQYKRFVFNRRHIVCVVFSIAICAGLFAERAYYYAFASPPSG    | 823  |
| human-Duox2    | TEALQEKMQRGFLAQKLRQYKRFVFNRRHIVCVVFSIAICAGLFAERAYYYGFASPPSD    | 1071 |
| rat-Duox2      | TEALQEKMQRGFLAQKLRQYKRFVFNRRHIVCVTIFSAICAGLFAERAYYYGFASPPD     | 1040 |
| chicken-Duox   | TEAQRKKYQNKVKVQKIQEFKRFIENYRRHIVCVVLSAITAGLFLERAYYYAFASPSTG    | 972  |
| frog-Duox1     | TVARREKYETSTFRQKIQQFKRVLVFNRRHIVCLIFVYGISAGLFAERAYYYGFASPSG    | 1028 |
| frog-Duox2     | RLYKKEKYPKGIHQKLEKRFVFNRRHIVCVVIFVYGISVGLFLERAYHYAFESQHRG      | 1075 |
| tetraodon-Duox | VDPKREYIRSPVIRQKIQQFKRFVFNRRHIVCFIVVYGITAGLCLERCYYYGFQAESTG    | 1089 |
| fugu-Duox      | VDPRRERYIRSPVIRQKIQHFKRFVFNRRHIVCSALVYVYMAAGLCLERCYYYGFQAESTG  | 998  |
| zebrafish-Duox | VRPQRERFNRNPVQQCVQQFKRFIENYRRHICTVVIYVYISAGLALERICIYYGLQAHSSG  | 1026 |
| medaka-Duox    | VKAKRQEYIRNPVQQKIQQFKRFIENYRRHIVCFIITYSITVGVTLERCYYYGLQAEATG   | 1075 |
| Ci-Duox-B      | SDATVSHEEKTWFARTWKYLRNENYRRHIFCMVIFVYGITIALVVERATFYAFGAEHIG    | 1057 |
| Ci-Duox-A      | IKVYEKVFKPGRLNNWLRAMENYVNHRLQIFWLTLYLLVLAGIFIERAYFYSVEREFAG    | 1027 |
| Ci-Duox-C      | VKTVREDYKTKSYEKFFVALVKLTEHYANHFCLSLYSLITAGVFLN-AFFVVYSKNATG    | 944  |
| Ci-Duox-D      | VMPDVYFQNSSKFRLAYRAIRRLFECYALHIFWTSLYIWIWITIGVFLW-AFSMTIYPSFIF | 965  |
| Sp-Duox        | VETVQQEEAKTQSSKAYNTVVRFFENNRLQIFVYVLYLLVLAGVFIERAYYSVEREFAG    | 1168 |
| fruit fly-Duox | IEPMQ-DKPRHWLLAKWDAYITFLEENRQNIYFLFLFYVVTIVLFFVERFIHYSFMAEHTD  | 997  |
| mosquito-Duox  | IEPIS-DSRRHWMQEKWDCYTTFLEENRQNIYFLFLFYVVTIVLFFVERFIHYSFMAEHTD  | 998  |
| honeybee-Duox  | IDQLPPEDSKTWAQKQWDAISTFLEENRQNIYFLFVYVVTIALFFVERFIYYSFMAEHTD   | 1003 |
| Celeg-Duox2    | IVDHST--PAPLSLIQR--ICAFLETYRQHVFIIFCFVAINIVLFFELFWHSRYLNEDRD   | 1023 |
| Celeg-Duox1    | VVDRSINSSAPLTLIHK--VSAFLETYRQHVFIIFCFVAINIVLFFERFWHYRYMAENRD   | 1017 |
