# Supplementary material for: Molecular evolution of the reactive oxygen-generating NADPH oxidase (Nox/Duox) family of enzymes
Source: Springer Nature journal article supplement (doi:10.1186/1471-2148-7-109), 2007-07-06
Supplement: 12862_2007_403_MOESM9_ESM.pdf [file 12862_2007_403_MOESM9_ESM.pdf]

Additional file 9

## **Amino acid sequences of ferric reductase (FRE) proteins of fungi and alignment of FRE protein and human Nox2 protein sequences**

Sequences were obtained from the GenBank™ databases

(<http://www.ncbi.nlm.nih.gov/>). To describe species of the genes, we used the following

abbreviations: An, *A. nidulans*; Scerevisiae, *Saccharomyces cerevisiae*; Spombe,

*Schizosaccharomyces pombe*. Gray boxes in alignment indicate the

Nox/Duox-conserved amino acid residues shown in Figure 6.

>Scerevisiae-FRE1: GenBank™ No. NP\_013315

MVRTRVLFCLFISFFATVQSSATLISTSCISQAALYQFGCSSKSKSCYCKNINWLGSVTACAYENSKSNKTLDS  
ALMKLASQCSSIKVYTLEDMKNIYLNASNYLRAPEKSDKKTVVVSQPLMANETAYHYYYEENYGIHLNLMR  
SQWCAWGLVFFWVAVLTAATILNILKRVRFGKNIMANSVKKSLIYPSVYKDYNERTFYLWKRLPFNFTRGK  
GLVVLIFVILTILSLSFHGNIKLPHPYDRPRWRRSMAFVSRRADLMAIALFPVVYLFGIRNPNFIPITGLSFSTFN  
FYHKWSAYVCFMLAVVHSIVMTASGVKRGVFQSLVRKFRWGVIVATILMSIIIFQSEKVFNRNGYEIFLLIH  
KAMNIMFIAMYYHCHTLGWMGWISWAGILCFDRFCRIVRIIMNGGLKTATLSTDDSNVIKISVKKPKFF  
KYQVGAFAYMYFLSPKSAWFYSFQSHPFVLSERHRDPNPDQLTMYVKANKGITRVLLSKVLSAPNHTVD  
CKIFLEGPYGVTVPHIAKLRNLVGVAAGLVAAIYPHFVECLRLPSTDQLQHKFYWIVNDLSHLKWFENEL  
QWLKEKSCEVSVIYTGSSVEDTNSDESTKGFDDKEESEITVECLNKRPDKELVRSEIKLSELENNITFYSCG  
PATFNDDFRNAVVGIDSSLKIDVELEEEESFTW

>Spombe-FRE1: GenBank™ No. NP\_595271

MILARDDKWTLGSIALIFVLLIGFALLFLLERFRVKEKSRTFKDCVNVYQCPSKGERVYLALRHWIFLATHK  
AQMTLILSPLVMLVTIPFTGKETKNSIASYDWNLTGVAARLGYLSCGLFFVSYFFSLKNNPFCLMLFSSHEK  
MNYLHRWLSVYAVLISVLHGILFMIFSAQSYKPLLYDKISYGYFITVVLFLMTVASLPSVRRKFFEFFVLH  
HTCSVLIIFLIWLHHPRTIVYMKACIIYAFDRGCRLEFRSIWNRNFRILYLLNEDMIYMVGRKPKRSFFALPWA  
AGSHVYINIPSLSYWQVHPFTLASAPFDDFIELFVAVHSGFTERLANRLYSMPHEYPNFSLAPGTPESLSNTYR  
ELNSFKSYAVEIENTAQGHYEPEDLYLETTVMFDGPYGTTSNVFKEYSYVLLIAGGVGFSYTLPIRLDLIK  
ECNVTISITFIWSCRSLKLVASKSLNLLHQSNVRLKIINHFTGSISCKESSEFSNQTENSEMEFFDDRPDL  
MYIQKFFDYVGYQTAALAACGSQSFLKRIKNSVNKSISSTTDIYQHYEEL

>Spombe-FRE2: GenBank™ No. NP\_595065

MAINSSDKWTVIAICLILGILLAFILMFWLERFRVIKSNAHKHDPSPDKRQIWLEKYYLFVRQIYTYLVTHKVI  
LTLIAVPVVFAISIPFIGMQTPASSHGKQTTQVSTGNWSKNAVAARLGFLACGLYVTSYFFSIKNNPFALLIS  
SHEKMNYVHRRLSQYAIMIGAIHGFAIYGLAAQGKRALLTARVTIIGYVILGLMVIMIVSSLPFFRRRFYEW  
FVLHMHCSIGFLITIWLHHRRCVVYMKVCVAVYVDFRGCRLRSFLNRSKFDVVLVEDDLIYMKGPRPKKS  
FFGLPWGAGNHMYINIPSLSYWQIHPFTIASVPSDDFIELFVAVRAGFTKRLAKKVSSKSLSDVSDINISDEKIE  
KNGDVGIEVMERHLSLQEDLVFESSAAKVSFLMDGPYGPVSNPYKDYSYFLFAGGVGVSYLPIILDITIKKQ

SRTVHITFVWSARSSALLNIVHKSACEAVRYTEMNINIFCHLTNSYPVEEVSSLNSQSARNYSLQYLNGRPDV  
NDYFKDFLHATGTQTAALASCGSDKLLRHLKSCVNTHSPSTVDLYQHYYEEI

>An-FRE: GenBank™ No. AAN61438

MGVDLLPPGQERQRHVHPPMNIALATPLFALAGGFLILFVGRLAIRMRHHLRLRAVLRNDDQTPFTNRNGF  
MAWTNRHVYFAPLFGARHSRELRIGRAHMGTVPLRIETLILALYIAINFAFFVCLVDWWEDYQEKLYQVKY  
AGGH LAVMNT PGLVLA AARNNPLIPLLGISFDTFNLFHRWVGRVIVVGAIIHMSAVIAGLIAEHGFETTTHII  
WEVPPFIWGMIALFGFILIAIQSVLLRHAFYEVFLHLHVALAVMSFVGLWYHLRGLSEQQNVVLGTIILWGL  
ERVTRVASLVWRNVGKQRTVADFELLPGNVIRATVTLARTGEFRAGQHMYLYVPSVGLWTSHPFSVAWTS  
TEEVSVDSDSNESFKMLLDRKQPQTISFLIKREDGFTRELQRKAANS DTCQFTTTVFAEGPYGLEDLNSYGT  
VLLIASGVGITNTMSYLYQFLEGFSARKTAVRRVNLVWVTRSVEDLHWIDPWMKSVFTHPAIATKESFQNN  
RLAVSVQVYVTRKEASEASVG DSEN LWAFSAPSGVSVSVGFGRPGFAVVIEREMETQVGAMAVSVCNGC  
VTDDVRQAVREAQKGAKTISLHDEAFCW

|                  |                                                                 |     |
|------------------|-----------------------------------------------------------------|-----|
| Spombe-FRE1      | -----MILARDDKWTLSIALIFVLLIGFALLFLERFRVKEKSR                     | 40  |
| Spombe-FRE2      | -----MAINSSDKWTVIAICLILGILLAFILMFWLERFRVIKSN                    | 40  |
| Scerevisiae-FRE1 | -----                                                           |     |
| Aspergillus-FRE  | MGVDLLPPGQERQRHVHPPMNIALATPLFALAGGFLILFVGRLAIRMRHHLRLRAVLRND    | 60  |
| human-Nox2       | -----MGNWAVNEGLSIFVILVWGLNVFLFVWYRVDI                           | 35  |
| Spombe-FRE1      | TFKDCVNVYQCPKGERVYLALRHWFIFLATHK--AQMTLILSPLVMLVTIPFTGKETKN     | 98  |
| Spombe-FRE2      | AHKHDP-SDKRQIWLEKYLVFRQIYTYLVTHK--VILTIAVPVFAISIPFIMGQTPA       | 97  |
| Scerevisiae-FRE1 | -----YLWKRLPFNFTTRGK--GLVVLIFVILTILSLSFGHNIKLPH                 | 40  |
| Aspergillus-FRE  | DQTPFTNRNGFMAWTNRHVYFAPLFGARHSRELRIGRAHMGTVPLRIETLILALYIAINF    | 120 |
| human-Nox2       | P-----PKFFYTRKLLGSALALARA PAACLNFNCMLILLPVCRNLSFLR              | 81  |
| Spombe-FRE1      | S-----IASYDWNLTGVAARLGYLSCGLFFVSYFFSLKNNPFCLMLFSSHEKMNLYLH      | 150 |
| Spombe-FRE2      | SSHGKQTTQVSTGNWSKNAVAARLGFACGLYVTSYFFS IKNPFALLL I SSHEKMNLYVH  | 157 |
| Scerevisiae-FRE1 | PYD-----RPRWRRSMAFVSRADLMAIALFPVVYLFGRNPFIPITGLSFSTFNFYH        | 94  |
| Aspergillus-FRE  | AFFVCLVDWWEDYQEKLYQVKYAGGH LAVMNT PGLVLA AARNNPLIPLLGISFDTFNLFH | 180 |
| human-Nox2       | SSACCSTRVRRQLDRNLTFFHKMVAWMI ALHSAIHTIAHLFNVEVCVNARVNSDPYSVAL   | 141 |
| Spombe-FRE1      | RWLSVYAVLISVLHGILFMIFSAQS-----YKPLLYDKISYGYFITVVLFLMTVASLP      | 204 |
| Spombe-FRE2      | RRLSQYAIMIGAIHGFAIYGLAAG-----KRALLTARVTIIGYVILGLMVIIVSSLP       | 211 |
| Scerevisiae-FRE1 | KWSAYVCFMLAVVHSIVMTASGVKRG----VFQSLVRKFYFRWIVATILMSIIFQSEK      | 150 |
| Aspergillus-FRE  | RWVGRVIVVGAIIHMSAVIAGLIAEHGFETTTHIIWEVPPFIWGMIALFGFILIAIQSVS    | 240 |
| human-Nox2       | SELGDRQNESYLNFAKRRIKNPEGG-----LYLAVTLLAGITGVVITLCLILITTSSTK     | 195 |
| Spombe-FRE1      | SVRRKFFEFVFLHHTCSVLIIFLIWLHHPRT--IVYMKACIIYAFDRGRCRLFRSIWNR     | 262 |
| Spombe-FRE2      | FFRRRFYEFVFLHHCISIGFLITIWLHHRRC--VVYMKVCVAVYVDRGRCRLRSFLNR      | 269 |
| Scerevisiae-FRE1 | VFRNRGYEIFLLIHKAMNIMFIIAMYYHCHTLGWMGWIWSMAGILCFDRFCRIVRIIMNG    | 210 |
| Aspergillus-FRE  | LLRHAFYEVFLHLHVALAVMSFVGLWYHLRGLSEQQNVVLGTIILWGLERVTRVASLVWRN   | 300 |
| human-Nox2       | TIRRSYFEVFWYTHHLFVIFFIG--LAIHGAERI VRGQTAESLAVHNI TVCEQKISEWG   | 252 |
| Spombe-FRE1      | -SNFRIYLLNEDMIYVGRKPKRSFFALPWAAGSHVYINIPS--LSYWQVHPFTLASAP      | 318 |
| Spombe-FRE2      | -SKFDVVLVEDDLIYMKGPRPKSFFGLPWGAGNHMYINIPS--LSYWQIHPFTIASVP      | 325 |
| Scerevisiae-FRE1 | GLKTATLSTDDSNVIKISVKKPKFFKYQVGAFAYMYFLSPKSAWFYSFQSHPFVLSER      | 270 |
| Aspergillus-FRE  | VGKQRTVADFELLPGNVIRATVTLARTGEFRAGQHMYLYVPS--VGLWTSHPFSVAWTS     | 357 |
| human-Nox2       | KIKECPIQFAGNPPMTWKWIVGPMFLYLCELRVRFWRSQOK-VVITKVVTHPFKTIELQ     | 311 |
| Spombe-FRE1      | PDFDIELFVAVHSGFTERLANRLYSMPHEYNFSIAPGTPESLSNTYRELNSFKSYAVEI     | 378 |
| Spombe-FRE2      | SDDFIELFVAVRAGFTKRLAKKVSSK-----SLSDVSDINI SDEKTEKNGDVGIEVME     | 378 |
| Scerevisiae-FRE1 | HR-----DPNPDQLTMYVKANKG-----I                                   | 290 |

|                  |                                                              |     |
|------------------|--------------------------------------------------------------|-----|
| Aspergillus-FRE  | TEEVSVSDSDSNES-----FKMLDRKPOTTISFLIKREDG-----F               | 393 |
| human-Nox2       | MKKKGFKMEVQYIFVKCPKVKLEWHP----FTLTSAPPEEDFFSIHIRIVG--DWTEGL  | 365 |
| Spombe-FRE1      | ENTAQGHTEPEDLYLETTVMFMDGPYGTTS-NVFKEYSYVLLIAGGVGFSYTLPILRDLI | 437 |
| Spombe-FRE2      | RHSLSQEDLVFESSAAKVSVLMDGPYGPVS-NPYKDYSYLFLFAGGVGVSYLPIILDTI  | 437 |
| Scerevisiae-FRE1 | TRVLLSKVLSAPNHTVDCKIFLEGPYGTVPHIAKLRNLVGVAAAGLVAAIYPHFVECL   | 350 |
| Aspergillus-FRE  | TRELQRKAANSBTCQFTTTVFAEGPYGGLE--DLNSYGTVLLIASGVGITNTMSYLYQFL | 451 |
| human-Nox2       | FNACGCDKQEFQDAWKLPKIAVDGPPGTAS-EDVFSYEVVMLVGAGIGVTPFASILKSVW | 424 |
| Spombe-FRE1      | LK-----ECNVTSITFIWSCRSLSLKVKASKLSNLLHQ-----SNVRLKIIN--       | 480 |
| Spombe-FRE2      | KK-----QSRTVHITFVWSARSSALLNI VHKS LCEAVRY-----TEMNINIFC--    | 480 |
| Scerevisiae-FRE1 | RLP-----STDQLQHKFYWIVNDLSHLKWFENELQWLKEK-----SCEVSVIYTG      | 396 |
| Aspergillus-FRE  | EGFS--ARKTAVRRVNLVWVTRSVEDLHWIDPMMKSVFTHPAIATKESFQNNRLAVSVQV | 509 |
| human-Nox2       | YKYCNNATNLKLLKIYFYWLCRDTHAFEFADLLQLLESQMQE-----RNNAGFLSYNI   | 478 |
| Spombe-FRE1      | HFTGSI SCKESSEFSN----QTTENSEMEFFDDRPDLDMYIQKFFDYVGYQT--AALAA | 533 |
| Spombe-FRE2      | HLTNSYPVEEVSSLNS----QSARNYSLQYLNGRPDVNDYFKDFLHATGTQT--AALAS  | 533 |
| Scerevisiae-FRE1 | SVEDTNSDESTKGFDD----KEESEITVECLNKRPDLKELVRSEIKLSELENNNITFYS  | 451 |
| Aspergillus-FRE  | YVTRKEASEASVGDSENWAFSAPSGVSVSVGFGRPGFAVVIEREMET---QVGAMAVSV  | 566 |
| human-Nox2       | YLTGWDESQANHFVHHDEEKDVI TGLKQKTLYGRPNWDNEFKTIASQHPNTR--IGVEL | 536 |
| Spombe-FRE1      | CGSQSFLKRIKN-SVNKSI SSTTDIYQHYEEL----                        | 564 |
| Spombe-FRE2      | CGSDKLLRHLKS-CVNTHSPSTVDLYQHYEEL----                         | 564 |
| Scerevisiae-FRE1 | CGPATFNDDFRN-AVVQGI DSSLKIDVELEEEESFTW                       | 486 |
| Aspergillus-FRE  | CGNGCVTDDVRQ-AVREAQKGAKTISLHDEAFCW--                         | 599 |
| human-Nox2       | CGPEALAEI LSKQSI SNSESGPRGVHIFNKENE--                        | 570 |
