# Supplementary material for: Molecular evolution of the reactive oxygen-generating NADPH oxidase (Nox/Duox) family of enzymes
Source: Springer Nature journal article supplement (doi:10.1186/1471-2148-7-109), 2007-07-06
Supplement: 12862_2007_403_MOESM11_ESM.pdf [file 12862_2007_403_MOESM11_ESM.pdf]

Additional file 11

### **Exceptions of amino acid residues conserved in all Nox/Duox proteins**

We identified 68 amino acid residues that were highly conserved in eukaryote Noxes and showed them in Figure 6. Possibly due to mis-sequencing of the part of the genome or to tolerance of evolutionary changes in the species, some of conserved amino acids contained rare exceptions, as indicated by *asterisks* in Figure 6. The residue numbers shown below correspond to the numbers that are shown in Figure 6 with *asterisks*. The single letter amino acid code is used. Sequences of *A. thaliana* rbohH and *T. nigroviridis* Nox5 are truncated in the C-terminus (alignment was shown in Additional file 5), and they failed to conserve many of the identified 68 amino acids (9 residues of *A. thaliana* rbohH and 16 residues of *T. nigroviridis* Nox5). Therefore, we did not list exceptions in these two sequences here.

\*1 = L (*C. elegans* Duox2), \*2 = L (*C. familliaris* Duox1 and *X. tropicalis* Duox2), \*3 = A (*X. tropicalis* Nox4), \*4 = I/T (*C. elegans* Duox1/2, respectively), \*5 = P (*G. gallus* Nox1), K (*X. tropicalis* Nox1), \*6 = T (*C. familliaris* Nox4), \*7 = G (*G. gallus* Nox1), M (*X. tropicalis* Nox1), \*8 = I (*R. norvegicus* Nox3), \*9 = deletion (*C. familliaris* Nox4), \*14 = S (*X. tropicalis* Duox2), \*11 = M (*X. tropicalis* Nox2), \*12 = T (*D.*

*discoideum* NoxA), \*13 = M (*D. rerio* Nox2), \*14 = F (*P. anserine* NoxB, *M. grisea* NoxB), \*15 = M (*T. nigroviridis* Nox1, *T. rubripes* Nox1, *O. latipes* Nox1), \*16 = A (*C. elegans* Duox1/2), \*17 = S (*A. thaliana* rbohB), \*18 = Y (*C. elegans* Duox1/2), \*19 = R (*T. nigroviridis* Nox5), \*20 = Q (*T. nigroviridis* Nox5), \*21 = A (*T. nigroviridis* Nox5), \*22 = E (*T. nigroviridis* Nox5), \*23 = T (*C. intestinalis* Nox4), \*24 = S (*C. crispus* NoxD), \*25 = C (*C. crispus* NoxD), \*26 = M (*A. thaliana* rboh H and J), \*27 = A (*P. yezoensis* NoxD), \*28 = Y (*O. latipes* Nox2), \*29 = L (*C. intestinalis* Nox4), \*30 = R (*O. latipes* Nox2), \*31 = S (*C. intestinalis* Nox4), \*32 = deletion (*R. norvegicus* Nox2), L (*O. latipes* Nox2), \*33 = M (*O. latipes* Nox2), \*34 = M (*C. intestinalis* DuoxD), \*35 = T (*T. nigroviridis*, *T. rubripes*, *D. rerio* Nox1), \*36 = D (*C. familliaris* Duox2), \*37 = M (*S. purpuratus*-Nox5B), \*38 = P (*C. familliaris* Duox2), Y (*C. intestinalis* Duox-D), \*39 = W (*F. graminearum* NoxC), \*40 = deletion (*P. yezoensis* NoxD), \*41 = L (*D. discoideum* NoxB), \*42 = deletion (*C. familliaris* Duox2, *G. gallus* Duox1, *C. intestinalis* Duox-A), \*43 = D (*F. graminearum* NoxC), \*44 = deletion (*P. yezoensis* NoxD), \*45 = deletion (*T. rubripes* Nox4), \*46 = deletion (*C. familliaris* Duox2, *G. gallu* Duox1, *C. intestinalis* Duox-A), \*47 = Y (*F. graminearum* NoxC), \*48 = deletion (*P. yezoensis* NoxD).
