# Supplementary material for: Molecular evolution of the reactive oxygen-generating NADPH oxidase (Nox/Duox) family of enzymes
Source: Springer Nature journal article supplement (doi:10.1186/1471-2148-7-109), 2007-07-06
Supplement: 12862_2007_403_MOESM18_ESM.pdf [file 12862_2007_403_MOESM18_ESM.pdf]

| No. | residue | consensus | CGD          | location    | Nox1             | Nox2               | Nox3            | Nox4             | Nox5             | Duox               | At-rboh            | NoxM                 | (Ag-NoxM) (fungus) (amoeba)(amoeba) (fungus) |                  |      |                  | NoxD               |
|-----|---------|-----------|--------------|-------------|------------------|--------------------|-----------------|------------------|------------------|--------------------|--------------------|----------------------|----------------------------------------------|------------------|------|------------------|--------------------|
|     |         |           |              |             |                  |                    |                 |                  |                  |                    |                    |                      | NoxC                                         | NoxC             | NoxC | NoxC             |                    |
| 1   | R54     | R/K       | <b>R54M</b>  | TM2         | R                | R                  | R               | R                | K/R              | R* <sub>1</sub>    | K                  | R                    | R                                            | R                | R    | R                | R                  |
| 2   | A57     | A/G       | <b>A57E</b>  | TM2         | A                | A/G                | A               | A                | G                | A                  | A                  | A                    | G                                            | A                | A    | A                | A                  |
| 3   | R73     | R/K       |              | B-loop      | R                | R                  | R               | R                | R                | R                  | R                  | K                    | R                                            | R                | K    | R                | R                  |
| 4   | R80     | R/K       |              | B-loop      | R                | R                  | R               | R                | R                | R/K                | R                  | H*                   | R                                            | R                | R    | R                | R                  |
| 5   | L94     | a         |              | B-loop      | L                | L                  | L               | L                | L                | V/F/L              | F                  | L                    | L/F                                          | F/I              | V    | W                | F                  |
| 6   | D95     | D/E       |              | B-loop      | D                | D                  | D               | D                | D/E              | D                  | D                  | E                    | D                                            | D                | D    | D                | D                  |
| 7   | H101    | H         | <b>H101Y</b> | TM3-heme    | H                | H                  | H               | H                | H                | H                  | H                  | H                    | H                                            | H                | H    | H                | H                  |
| 8   | H115    | H         |              | TM3-heme    | H                | H                  | H               | H                | H                | H* <sub>2</sub>    | H                  | H                    | H                                            | H                | H    | H                | H                  |
| 9   | H119    | H         |              | TM3         | H                | H                  | H               | H* <sub>3</sub>  | H                | H                  | H                  | H                    | H                                            | H                | W*   | H                | H                  |
| 10  | T178    | T/S       |              | TM4         | T                | T/S                | T               | T/S              | T                | T                  | T                  | T                    | T                                            | T                | T    | T                | T                  |
| 11  | G179    | G         |              | TM4         | G                | G                  | G               | G                | G                | G                  | G                  | G                    | G                                            | G                | G    | G                | G                  |
| 12  | R198    | R         |              | D-loop      | R                | R                  | R               | R                | R                | R*                 | R                  | R                    | R                                            | R                | R    | R                | R                  |
| 13  | F205    | F         |              | TM5         | F                | F                  | F               | F                | F                | F                  | F                  | F                    | F                                            | F                | F    | F                | F                  |
| 14  | H209    | H         | <b>H209R</b> | TM5-heme    | H                | H                  | H               | H                | H                | H                  | H                  | H                    | H                                            | H                | H    | H                | H                  |
| 15  | H222    | H         |              | TM5-heme    | H                | H                  | H               | H                | H                | H                  | H                  | H                    | H                                            | H                | H    | H                | H                  |
| 16  | E283    | D/E       |              | TM6         | E* <sub>5</sub>  | E                  | E               | E* <sub>6</sub>  | E                | D                  | E                  | D*                   | E                                            | E                | D    | E                | D                  |
| 17  | R284    | R/K       |              | TM6         | R* <sub>7</sub>  | R                  | R* <sub>8</sub> | R* <sub>9</sub>  | K/R              | K/R*               | R                  | L*                   | R                                            | R                | R    | R                | R                  |
| 18  | L310    | V/I/L     |              | TM6-FAD     | L                | L                  | L               | L/I/V            | L                | L/I                | L/I                | I                    | I                                            | V/L              | L    | I                | L                  |
| 19  | M312    | a         |              | TM6-FAD     | M/L              | M                  | M               | M/L              | I/V              | F/Y                | M/L/V              | L                    | F/I/M                                        | M                | F    | S*               | L/V                |
| 20  | K314    | K/R       |              | TM6-FAD     | K                | K/R*               | K               | K/R              | R                | R                  | K/R                | L*                   | K                                            | R* <sub>12</sub> | K    | R                | R                  |
| 21  | G322    | G         |              | TM6-FAD     | G                | G                  | G               | G                | G                | G                  | G                  | G                    | G                                            | G                | G    | G                | G                  |
| 22  | V327    | V/I/L     |              | TM6-FAD     | V/I/L            | V/I* <sub>13</sub> | V/I/L           | L/V              | L/V              | I/L/V              | I/L/V              | L                    | L/I* <sub>14</sub>                           | L                | I    | L*               | V                  |
| 23  | H338    | H         | <b>H338Y</b> | FAD1        | H                | H                  | H               | H                | H                | H                  | H                  | H                    | H                                            | H                | H    | H                | H                  |
| 24  | F340    | F         |              | FAD1        | F                | F                  | F               | F                | F                | F                  | F                  | F                    | F                                            | F                | F    | F                | F                  |
| 25  | T341    | T/S       | <b>T341K</b> | FAD1        | T                | T                  | T               | T/S              | T/S              | T/S                | T/S                | T                    | T                                            | T                | T    | T                | T                  |
| 26  | L342    | L/I/V     |              | FAD1        | L* <sub>15</sub> | L                  | L               | L                | L                | I/L                | L/I                | I                    | I                                            | I/L              | I/L  | M*               | I/V                |
| 27  | T343    | T/S       |              | FAD1        | T                | T                  | T               | T                | S                | T/S* <sub>16</sub> | T                  | T                    | T                                            | T                | T    | S                | A*                 |
| 28  | P346    | P         |              | FAD1        | P                | P                  | P               | P                | P                | P                  | P* <sub>17</sub>   | P                    | P                                            | P                | P    | V/R*             | P                  |
| 29  | F351    | a         |              | FAD2        | F                | F                  | F               | F                | I/M/L            | L                  | L/I                | I*                   | V/I                                          | V/I              | I    | M                | L/M                |
| 30  | H354    | H         |              | FAD2        | H                | H                  | H               | H                | H                | H                  | H* <sub>18</sub>   | I*                   | H                                            | H                | H    | H                | Y*                 |
| 31  | I355    | a         |              | FAD2        | I                | I/V                | I               | F/L/I/V          | I                | I                  | I* <sub>20</sub>   | I                    | I/V/M                                        | I                | I    | I                | I                  |
| 32  | R356    | R/K       |              | FAD2        | R                | R                  | R               | R                | K/R              | R                  | R/K                | R/K                  | K                                            | R                | N*   | R                | K                  |
| 33  | G359    | G         |              | FAD2        | G                | G                  | G               | G                | G                | G                  | G                  | G                    | G                                            | G                | G    | G                | K                  |
| 34  | W361    | W/F       |              | FAD2-NADPH1 | W                | W                  | W               | W                | W                | W                  | W* <sub>22</sub>   | W                    | F                                            | W                | W    | W                | W                  |
| 35  | T362    | T         |              | FAD2-NADPH1 | T                | T                  | T               | T                | T                | T                  | T                  | T                    | T                                            | T                | T    | T                | T                  |
| 36  | V387    | a         |              | VXGPFPG     | V                | V/I                | V/I             | I/V              | I/V/L            | L/I/V/M            | I/V                | L                    | I/V                                          | I                | I    | I                | I                  |
| 37  | G389    | G         | <b>G389E</b> | VXGPFPG     | G                | G                  | G               | G                | G                | G                  | G                  | G                    | G                                            | G                | G    | G                | G                  |
| 38  | P390    | P         |              | VXGPFPG     | P                | P                  | P               | P                | P                | P                  | P                  | P                    | P                                            | P                | P    | P                | P                  |
| 39  | F391    | F/Y       |              | VXGPFPG     | F                | F                  | F/Y             | F* <sub>23</sub> | Y                | F/Y                | Y                  | Y                    | F/Y                                          | F                | F    | F                | Y                  |
| 40  | G392    | G         |              | VXGPFPG     | G                | G                  | G               | G                | G                | G                  | G                  | P*                   | G                                            | G                | G    | G                | G                  |
| 41  | M405    | a         |              | NADPH1      | V/M              | M/I                | V               | L/M              | V/I              | V/I                | L                  | L                    | V                                            | I/V              | I    | I                | V                  |
| 42  | G408    | G/A       | <b>G408E</b> | NADPH1      | G                | G                  | A               | A                | G/A              | G                  | G                  | G                    | G                                            | G                | G    | G                | G/S* <sub>24</sub> |
| 43  | G410    | G         |              | NADPH1      | G                | G                  | G               | G                | G                | G                  | G                  | G                    | G                                            | G                | G    | G                | G                  |
| 44  | I411    | I         |              | NADPH1      | I                | I                  | I               | I                | I                | I                  | I                  | I                    | I                                            | I                | I    | I                | I                  |
| 45  | G412    | G         |              | NADPH1      | G                | G                  | G               | G                | G                | G                  | G                  | G                    | G                                            | G                | G    | G                | G                  |
| 46  | V413    | a         |              | NADPH1      | V                | V                  | V               | V                | I/V              | V                  | A                  | I                    | V                                            | V                | V    | V                | L/V                |
| 47  | T414    | T/S       |              | NADPH1      | T                | T                  | T               | T                | T                | T                  | T                  | T                    | T                                            | T                | S    | T                | T                  |
| 48  | P415    | P         | <b>P415H</b> | NADPH1      | P                | P                  | P               | P                | P                | P                  | P                  | P                    | P                                            | P                | P    | P                | P                  |
| 49  | L420    | L/I/V     | <b>L420P</b> | NADPH1      | L                | L                  | L               | L                | L                | L                  | L                  | L/V/I                | M*                                           | L                | L    | L                | L                  |
| 50  | V423    | L/I/V     |              | NADPH1-2    | I                | V                  | I/V             | L                | I                | L/I                | I                  | I/V/L* <sub>26</sub> | L                                            | I                | I/L  | I                | L                  |
| 51  | F441    | F         |              | NADPH2      | F                | F* <sub>28</sub>   | F               | F                | F* <sub>29</sub> | F                  | F                  | F                    | L                                            | F                | F    | F                | F                  |
| 52  | W443    | W         |              | NADPH2      | W                | W* <sub>30</sub>   | W               | W                | W                | W                  | W                  | W                    | W                                            | W                | W    | W                | W                  |
| 53  | L444    | L/I/V     |              | NADPH2      | I/L              | L                  | I               | V* <sub>31</sub> | I                | V/I                | V                  | I                    | V/I                                          | I                | L    | M*               | T                  |
| 54  | W453    | W         |              | NADPH2-3    | W                | W* <sub>32</sub>   | W               | W                | W                | W                  | W                  | W                    | W                                            | W                | W    | W                | W                  |
| 55  | L457    | L/I/V     |              | NADPH2-3    | L                | L* <sub>33</sub>   | L               | L                | L                | L                  | I/V* <sub>34</sub> | I/V                  | E*                                           | L                | L/I  | L                | L                  |
| 56  | L458    | a         |              | NADPH2-3    | L                | L/V                | L               | L/I              | L                | L/V                | M                  | I                    | L                                            | I/L              | L    | L                | L                  |
| 57  | G512    | G/A       |              | NADPH3      | G                | G                  | G               | G                | G                | G                  | A                  | G                    | G                                            | G                | G    | G                | G                  |
| 58  | R513    | R/K       |              | NADPH3      | R                | R/K                | R               | R                | R                | R                  | R                  | R/K                  | R                                            | R                | R    | R                | R                  |
| 59  | P514    | P         |              | NADPH3-4    | P                | P                  | P               | P                | P                | P                  | P                  | P                    | P                                            | P                | P    | P                | P                  |
| 60  | W516    | a         | <b>W516R</b> | NADPH3-4    | W                | W                  | W               | W/V              | W                | F/M                | W                  | W                    | F/W                                          | W/F              | W    | F                | W                  |
| 61  | V534    | V         |              | NADPH3-4    | V* <sub>35</sub> | V                  | V               | V                | V                | V                  | V                  | V                    | V                                            | V                | V    | V                | V                  |
| 62  | F535    | F/Y       |              | NADPH4      | F                | F                  | F               | F                | F                | F                  | F                  | F                    | F/Y                                          | F                | F    | F                | F                  |
| 63  | C537    | C         | <b>C537R</b> | NADPH4      | C                | C                  | C               | C                | C                | C                  | C                  | C                    | C                                            | C                | C    | C                | C                  |
| 64  | G538    | G         |              | NADPH4      | G                | G                  | G               | G                | G                | G                  | G                  | G                    | G                                            | G                | G    | G                | G                  |
| 65  | L546    | L/I/V     | <b>L546P</b> | C-terminus  | L                | L                  | L               | L/V              | L/V              | V/I* <sub>36</sub> | L                  | I                    | I/L                                          | L/I              | L    | V                | I/V                |
| 66  | F563    | F/Y       |              | C-terminus  | F                | F                  | F               | F                | F* <sub>37</sub> | F* <sub>38</sub>   | F                  | L                    | F                                            | F* <sub>41</sub> | F    | Y* <sub>39</sub> | F* <sub>40</sub>   |
| 67  | E568    | E         | <b>E568K</b> | C-terminus  | E                | E                  | E               | E                | E                | E* <sub>42</sub>   | E                  | E                    | E                                            | E                | E    | E* <sub>43</sub> | E* <sub>44</sub>   |
| 68  | F570    | F         |              | C-terminus  | F                | F                  | F               | F* <sub>45</sub> | F                | F* <sub>46</sub>   | F                  | F                    | F                                            | F                | F    | F* <sub>47</sub> | F* <sub>48</sub>   |
