# Supplementary material for: Molecular evolution of the reactive oxygen-generating NADPH oxidase (Nox/Duox) family of enzymes
Source: Springer Nature journal article supplement (doi:10.1186/1471-2148-7-109), 2007-07-06

**A**EF-hand-containing Nox/Duox

|               |                        |                         |
|---------------|------------------------|-------------------------|
|               | <i>H. sapiens</i>      | Nox5/Duox1/Duox2        |
|               | <i>C. familiaris</i>   | Nox5/Duox1/Duox2        |
|               | <i>R. norvegicus</i>   | Duox1/Duox2             |
|               | <i>M. musculus</i>     | Duox1/Duox2             |
|               | <i>G. gallus</i>       | Nox5/Duox               |
|               | <i>X. tropicalis</i>   | Nox5/Duox1/Duox2        |
| deuterostomes | <i>D. rerio</i>        | (Nox5)/Duox             |
|               | <i>O. latipes</i>      | Nox5/Duox               |
|               | <i>T. nigroviridis</i> | (Nox5)/Duox             |
|               | <i>T. rubripes</i>     | Nox5/Duox               |
|               | <i>C. intestinalis</i> | DuoxA/DuoxB/DuoxC/DuoxD |
| nematode      | <i>S. purpuratus</i>   | Nox5A/Nox5B/Duox        |
|               | <i>C. elegans</i>      | Duox1/Duox2             |
| insect        | <i>D. melanogaster</i> | Nox5/Duox               |
|               | <i>A. gambiae</i>      | Nox5/Duox               |
|               | <i>A. mellifera</i>    | Nox5/Duox               |
| fungi         | <i>M. grisea</i>       | NoxC                    |
|               | <i>F. graminearum</i>  | NoxC                    |
| amoeba        | <i>D. discoideum</i>   | NoxC                    |
| green plant   | <i>A. thaliana</i>     | At-rboh (A-J)           |

**B**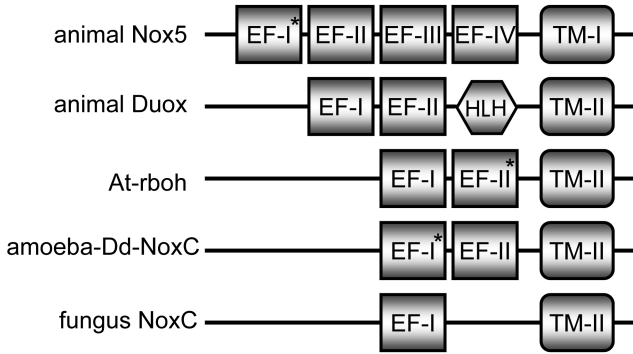**C**

## human Nox5

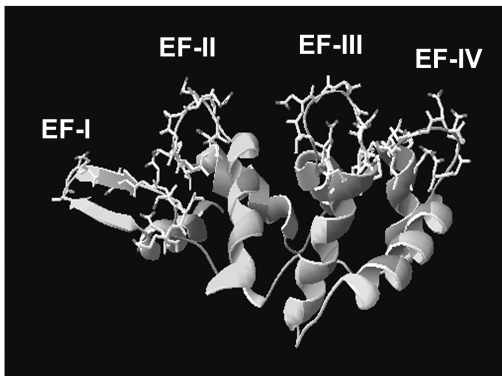

## human Duox1

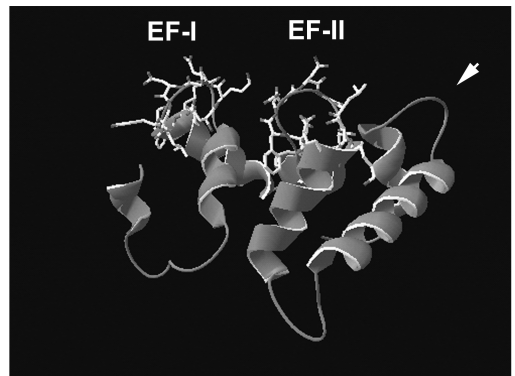

Supplement: 12862_2007_403_MOESM20_ESM.pdf [file 12862_2007_403_MOESM20_ESM.pdf]
