# Supplementary material for: Molecular evolution of the reactive oxygen-generating NADPH oxidase (Nox/Duox) family of enzymes
Source: Springer Nature journal article supplement (doi:10.1186/1471-2148-7-109), 2007-07-06
Supplement: 12862_2007_403_MOESM21_ESM.pdf [file 12862_2007_403_MOESM21_ESM.pdf]

# EF-hand-containing Nox/Duox

green plant  
(*A. thaliana*)

NoxA/NoxB

amoeba  
(*D. discoideum*)

fungi \*  
(not yeast)

NoxD

red algae

(Ancestor of eukaryotes)

mammal

Nox3

avian  
(*G. gallus*)

amphibian (*X. tropicalis*)

teleostei (*O. latipes*, *D. rerio*,  
*T. rubripes*, *T. nigroviridis*)

urochordate (*C. intestinalis*)

echinodermate (*S. purpuratus*)

insect  
(*D. melanogaster*, *A. mellifera*, *A. gambiae*)

nematode (*C. elegans*)

NoxM

Nox1

Nox4

Nox2
