# Supplementary figures and images for: Molecular evolution of the reactive oxygen-generating NADPH oxidase (Nox/Duox) family of enzymes
Source: Springer Nature journal article supplement (doi:10.1186/1471-2148-7-109), 2007-07-06

A

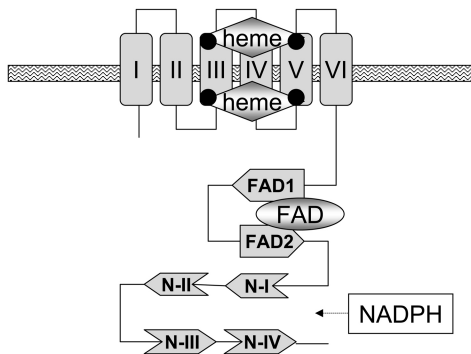

B

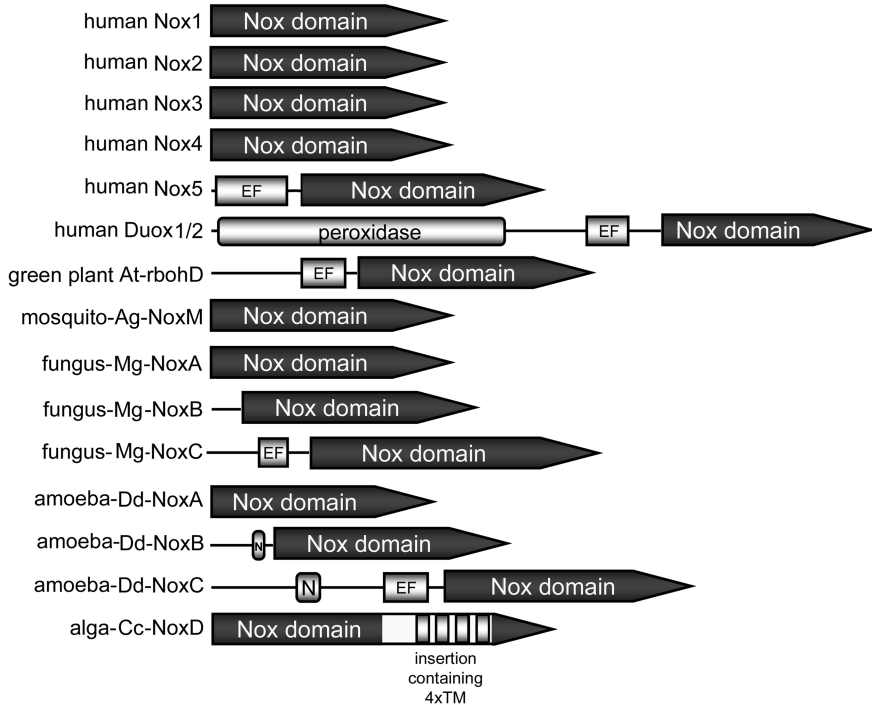

100 aa.

Supplement: 12862_2007_403_MOESM13_ESM.pdf [file 12862_2007_403_MOESM13_ESM.pdf]

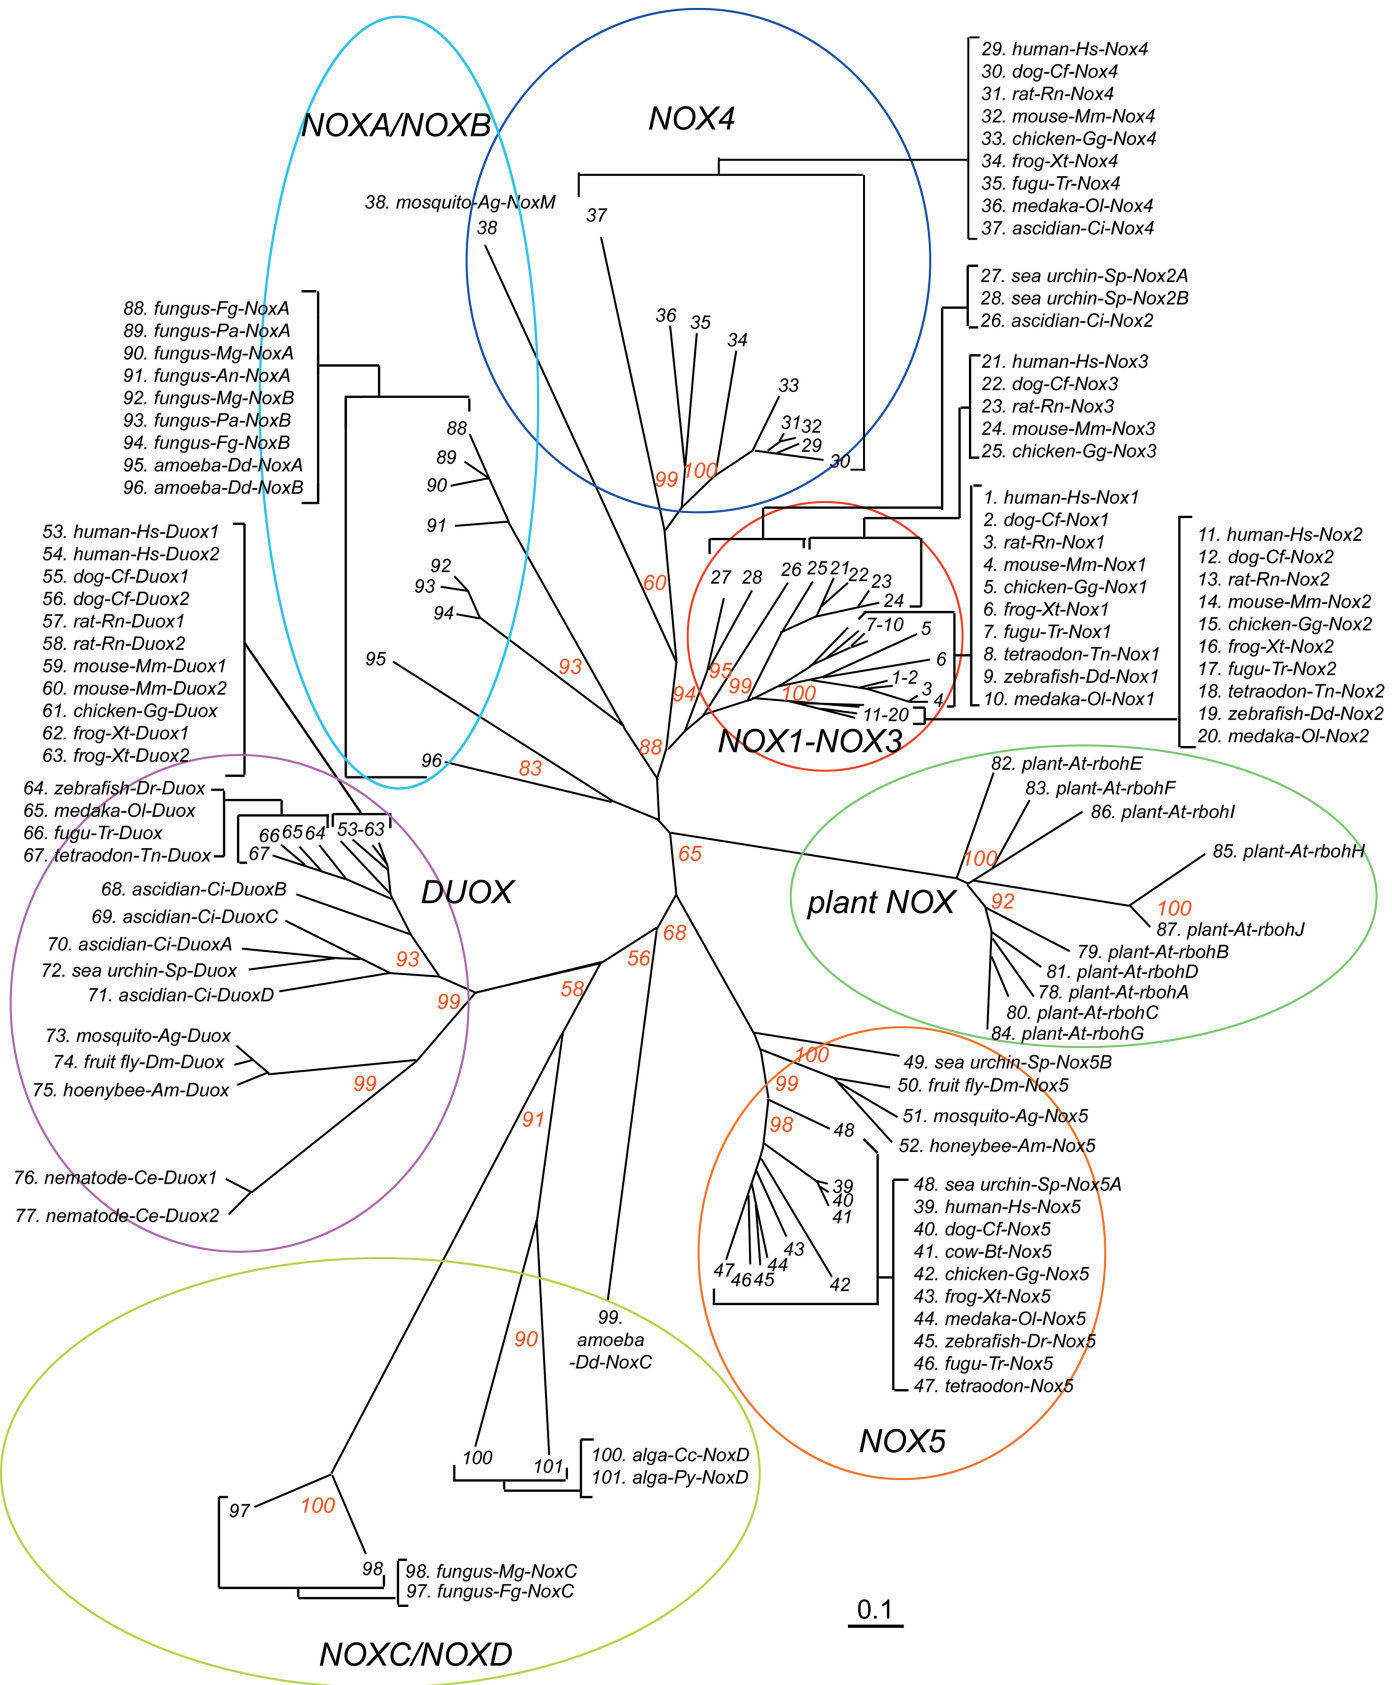

Supplement: 12862_2007_403_MOESM14_ESM.pdf [file 12862_2007_403_MOESM14_ESM.pdf]

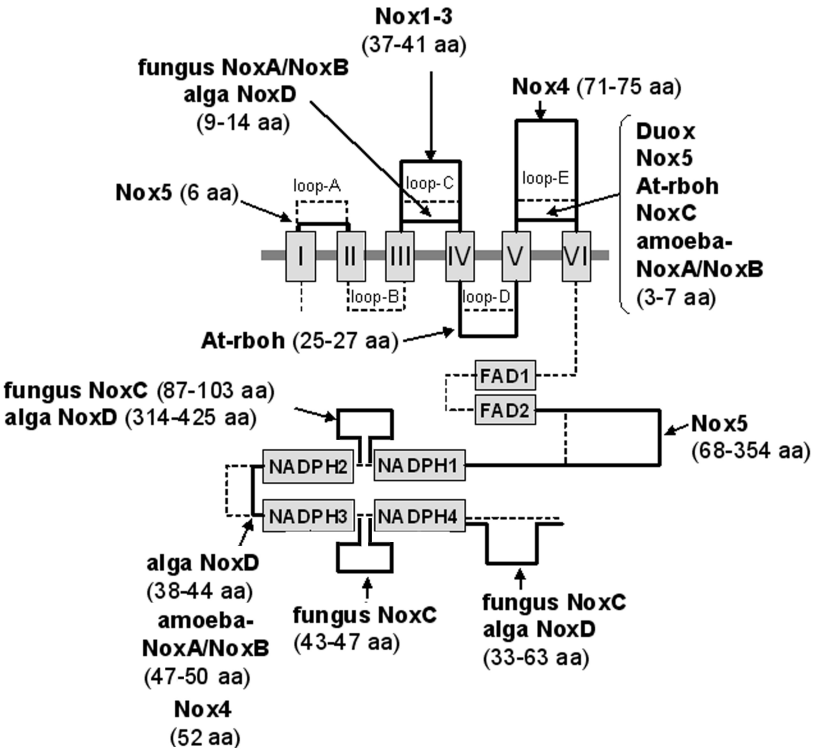

Supplement: 12862_2007_403_MOESM16_ESM.pdf [file 12862_2007_403_MOESM16_ESM.pdf]

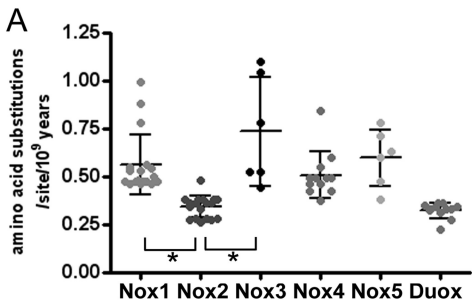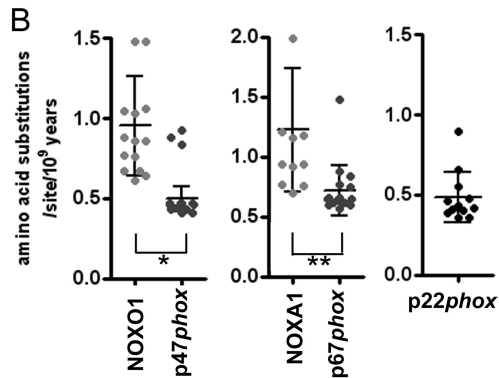

Supplement: 12862_2007_403_MOESM17_ESM.pdf [file 12862_2007_403_MOESM17_ESM.pdf]

A

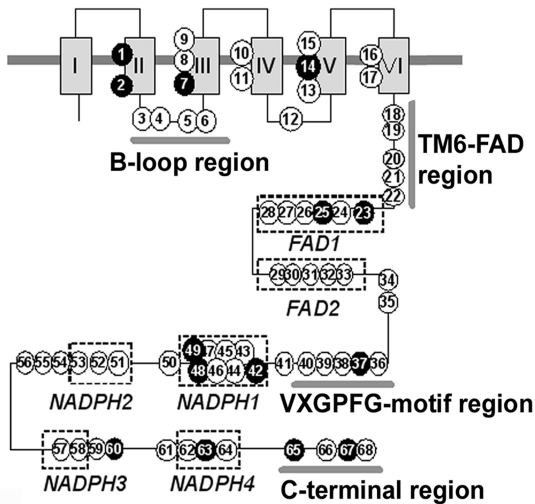

B

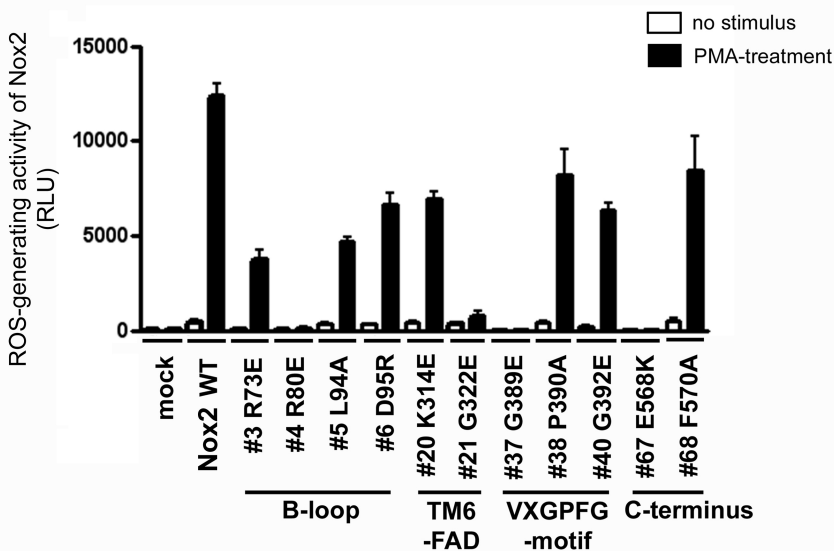

C

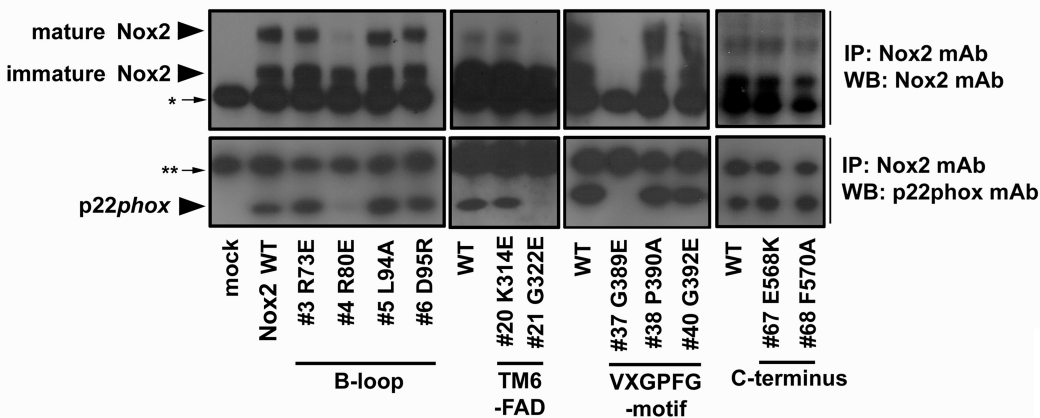

Supplement: 12862_2007_403_MOESM19_ESM.pdf [file 12862_2007_403_MOESM19_ESM.pdf]
